# Supplementary material for: Transcriptional activation of Jun and Fos members of the AP-1 complex is a conserved signature of immune aging that contributes to inflammaging
Source: bioRxiv preprint, doi:10.1101/2022.08.15.503978, version 1 (2022-08-15)
Supplement: Table S3 [file 503978_file17.xlsx]

## Sheet: SPLEEN_Age18vs3_NZO
Gene.Ensembl	logFC	AveExpr	t	P.Value	adj.P.Val	B
ENSMUSG00000052684	6.41658	7.04567	48.7517	3.44684e-31	5.83516e-27	58.3945
ENSMUSG00000054364	3.62786	6.7325	32.2042	1.22228e-25	8.76344e-22	48.2785
ENSMUSG00000021250	6.96101	7.08906	31.9526	1.55298e-25	8.76344e-22	47.1368
ENSMUSG00000052837	4.23777	8.30437	29.9601	1.10416e-24	4.65474e-21	46.1796
ENSMUSG00000003545	7.98505	6.26029	29.7448	1.37478e-24	4.65474e-21	44.1555
ENSMUSG00000024190	3.83132	7.01846	29.1778	2.46639e-24	6.95892e-21	45.3906
ENSMUSG00000023034	3.5595	7.14006	25.4851	1.46693e-22	3.54765e-19	41.458
ENSMUSG00000053560	2.71676	6.98858	22.8575	3.78441e-21	8.00829e-18	38.279
ENSMUSG00000044786	3.08092	9.04298	22.765	4.26833e-21	8.02872e-18	38.1502
ENSMUSG00000038418	3.90984	7.08293	22.3646	7.22528e-21	1.22317e-17	37.6302
ENSMUSG00000089788	-1.9517	5.4131	-21.928	1.29496e-20	1.99295e-17	37.0556
ENSMUSG00000028680	2.61606	4.19431	21.571	2.10278e-20	2.9665e-17	36.3869
ENSMUSG00000026826	3.88384	2.16474	21.4818	2.37608e-20	3.0942e-17	34.9747
ENSMUSG00000067928	-2.00432	3.49663	-21.1385	3.81911e-20	4.61813e-17	35.8689
ENSMUSG00000032501	2.53632	5.40162	20.4845	9.61313e-20	1.08494e-16	35.0634
ENSMUSG00000008348	1.36672	9.99152	20.2683	1.31152e-19	1.38767e-16	34.7576
ENSMUSG00000026628	5.47978	3.89207	19.9421	2.10767e-19	2.09887e-16	33.789
ENSMUSG00000035356	2.00074	5.96473	18.5834	1.63659e-18	1.53921e-15	32.2486
ENSMUSG00000019850	3.15822	7.25037	18.4384	2.052e-18	1.82833e-15	32.0222
ENSMUSG00000034765	2.64565	5.32702	17.9485	4.45533e-18	3.77122e-15	31.2579
ENSMUSG00000020863	-1.31446	7.43574	-17.4676	9.70082e-18	7.82025e-15	30.461
ENSMUSG00000000982	4.22141	3.00313	16.789	2.99901e-17	2.30774e-14	28.9512
ENSMUSG00000032515	2.476	6.49424	16.0712	1.03055e-16	7.58531e-14	28.1006
ENSMUSG00000000078	1.94267	7.77919	15.9939	1.18008e-16	8.07363e-14	27.9527
ENSMUSG00000055170	3.6124	2.40412	15.988	1.19228e-16	8.07363e-14	27.4467
ENSMUSG00000024042	2.80831	7.33454	15.8082	1.6377e-16	1.06633e-13	27.6258
ENSMUSG00000071076	2.25603	8.04486	15.7263	1.894e-16	1.18754e-13	27.4794
ENSMUSG00000037266	-0.970871	9.04296	-15.4409	3.15953e-16	1.91028e-13	26.9844
ENSMUSG00000042406	1.24564	7.79902	15.2535	4.43861e-16	2.59107e-13	26.6206
ENSMUSG00000072915	-2.4164	3.1549	-15.2254	4.6721e-16	2.63647e-13	26.626
ENSMUSG00000030103	2.29427	6.08513	14.921	8.17867e-16	4.46635e-13	26.0197
ENSMUSG00000043090	-1.5816	5.16067	-14.8221	9.83058e-16	5.20068e-13	25.8575
ENSMUSG00000041459	-0.976316	7.98404	-14.4249	2.07605e-15	1.06501e-12	25.0702
ENSMUSG00000026064	1.10675	6.34311	14.3923	2.2089e-15	1.09984e-12	24.9893
ENSMUSG00000026864	1.01249	9.30426	14.2403	2.95435e-15	1.42898e-12	24.7376
ENSMUSG00000056708	1.967	8.15475	14.1354	3.61486e-15	1.69989e-12	24.5089
ENSMUSG00000090086	-1.13353	5.45116	-13.9612	5.06771e-15	2.31868e-12	24.1674
ENSMUSG00000026754	-0.921888	4.80901	-13.9391	5.29081e-15	2.35705e-12	24.1586
ENSMUSG00000095123	-2.16928	3.9747	-13.7915	7.06363e-15	3.06616e-12	23.9342
ENSMUSG00000046351	-1.28905	4.59662	-13.7507	7.65523e-15	3.23989e-12	23.8175
ENSMUSG00000024521	1.9504	5.19988	13.592	1.04777e-14	4.32626e-12	23.4867
ENSMUSG00000097125	4.53002	1.76149	13.5249	1.19747e-14	4.82666e-12	22.8315
ENSMUSG00000051495	1.30807	6.72941	13.4568	1.3718e-14	5.40073e-12	23.1455
ENSMUSG00000014905	1.66215	5.48118	13.3909	1.56564e-14	6.02379e-12	23.0467
ENSMUSG00000031266	1.67112	2.93762	13.2008	2.29733e-14	8.64257e-12	22.7763
ENSMUSG00000066880	-1.18682	4.94787	-13.135	2.62591e-14	9.66394e-12	22.5352
ENSMUSG00000058427	8.03122	-0.0812406	13.0586	3.06862e-14	1.10529e-11	19.3971
ENSMUSG00000056749	2.10672	3.10522	12.8308	4.90257e-14	1.72907e-11	22.0203
ENSMUSG00000027589	-0.83655	5.95857	-12.7553	5.73302e-14	1.9807e-11	21.6967
ENSMUSG00000036192	-3.23329	9.07022	-12.5602	8.61549e-14	2.91703e-11	21.3556
ENSMUSG00000085438	-1.25676	7.76764	-12.5478	8.8436e-14	2.93555e-11	21.2774
ENSMUSG00000027981	-1.4129	4.68829	-12.5278	9.22221e-14	3.00236e-11	21.2832
ENSMUSG00000041362	1.86458	4.1372	12.4166	1.16607e-13	3.70739e-11	21.1347
ENSMUSG00000035828	2.24278	4.90256	12.4099	1.18258e-13	3.70739e-11	21.0753
ENSMUSG00000028214	2.4543	4.29792	12.3128	1.45332e-13	4.47333e-11	20.916
ENSMUSG00000033191	4.00614	0.91464	12.2848	1.54249e-13	4.66301e-11	20.5037
ENSMUSG00000047945	1.55501	6.02578	12.2612	1.62219e-13	4.8179e-11	20.6656
ENSMUSG00000021025	1.41237	7.40425	12.2397	1.69827e-13	4.95689e-11	20.6053
ENSMUSG00000018930	4.13669	2.00272	12.2261	1.74825e-13	5.0163e-11	20.4166
ENSMUSG00000076441	1.39898	5.89069	12.1633	1.99995e-13	5.57587e-11	20.449
ENSMUSG00000053218	-3.01445	0.109838	-12.1612	2.00914e-13	5.57587e-11	20.1623
ENSMUSG00000072612	3.03837	0.581125	12.1285	2.15507e-13	5.88438e-11	19.7483
ENSMUSG00000079138	6.96477	-0.945358	12.063	2.48169e-13	6.66865e-11	17.8214
ENSMUSG00000020205	2.12275	2.05026	12.0357	2.63216e-13	6.8961e-11	20.3011
ENSMUSG00000078899	-1.07384	5.91967	-12.033	2.6478e-13	6.8961e-11	20.156
ENSMUSG00000026023	-2.35475	1.68046	-11.9224	3.36452e-13	8.63e-11	20.0987
ENSMUSG00000027677	-0.950237	6.74822	-11.8485	3.95219e-13	9.98606e-11	19.7435
ENSMUSG00000086429	-1.5956	3.00263	-11.7256	5.17231e-13	1.28768e-10	19.694
ENSMUSG00000090509	-3.14785	-0.427456	-11.6419	6.21865e-13	1.52573e-10	18.8382
ENSMUSG00000032199	-0.858492	6.26724	-11.5631	7.40286e-13	1.79033e-10	19.1074
ENSMUSG00000097588	-2.53804	1.5104	-11.5206	8.13502e-13	1.93571e-10	19.1462
ENSMUSG00000003032	3.12236	5.08822	11.5095	8.33739e-13	1.93571e-10	19.1479
ENSMUSG00000074056	-3.86599	-0.298267	-11.509	8.34703e-13	1.93571e-10	18.4252
ENSMUSG00000031146	1.18599	6.42244	11.4442	9.6422e-13	2.20585e-10	18.842
ENSMUSG00000026358	2.76476	4.85038	11.3919	1.08379e-12	2.44634e-10	18.9062
ENSMUSG00000021974	-2.55441	0.925396	-11.36	1.16408e-12	2.59299e-10	18.7098
ENSMUSG00000060989	-1.45119	4.15825	-11.3508	1.18832e-12	2.61261e-10	18.6977
ENSMUSG00000035530	0.863833	9.09707	11.2936	1.35128e-12	2.9328e-10	18.5523
ENSMUSG00000038894	1.68784	5.30575	11.2802	1.39239e-12	2.98378e-10	18.5296
ENSMUSG00000051316	0.890236	4.68408	11.2653	1.43999e-12	3.04719e-10	18.5151
ENSMUSG00000036432	1.98598	4.60912	11.2567	1.46804e-12	3.0682e-10	18.5603
ENSMUSG00000042622	2.83221	1.47821	11.2183	1.60102e-12	3.30532e-10	18.4308
ENSMUSG00000053113	1.66844	5.70682	11.0863	2.15962e-12	4.40484e-10	18.0854
ENSMUSG00000029401	1.44409	5.50748	11.0703	2.23978e-12	4.51395e-10	18.0174
ENSMUSG00000059772	-1.86273	6.50501	-11.038	2.41044e-12	4.80075e-10	17.9189
ENSMUSG00000027368	2.65831	6.98869	11.022	2.50054e-12	4.92229e-10	17.9043
ENSMUSG00000037868	1.8775	4.08636	10.9743	2.78845e-12	5.42593e-10	17.9447
ENSMUSG00000026360	1.48871	6.59634	10.9438	2.98987e-12	5.75176e-10	17.7033
ENSMUSG00000020893	1.85606	6.40907	10.9342	3.05645e-12	5.81379e-10	17.6888
ENSMUSG00000050714	-1.65818	3.50093	-10.8918	3.36915e-12	6.33738e-10	17.8065
ENSMUSG00000072739	-2.04792	2.44076	-10.8483	3.72377e-12	6.92744e-10	17.7601
ENSMUSG00000001946	2.42624	1.70691	10.7517	4.65547e-12	8.56658e-10	17.4913
ENSMUSG00000030156	2.39537	5.79914	10.741	4.77238e-12	8.68727e-10	17.291
ENSMUSG00000097188	1.06213	5.87781	10.7054	5.18365e-12	9.33553e-10	17.147
ENSMUSG00000085178	3.29227	1.39329	10.6726	5.59477e-12	9.96988e-10	17.1805
ENSMUSG00000041417	-0.58901	7.43169	-10.6371	6.07682e-12	1.07161e-09	16.9867
ENSMUSG00000026249	1.8862	2.52523	10.5852	6.85914e-12	1.1971e-09	17.1056
ENSMUSG00000089978	-2.22208	2.31438	-10.5802	6.94081e-12	1.19899e-09	17.1391
ENSMUSG00000022257	1.77312	2.77237	10.5595	7.28426e-12	1.23765e-09	17.0916
ENSMUSG00000049892	3.28452	0.766815	10.558	7.31096e-12	1.23765e-09	16.8875
ENSMUSG00000028889	1.12948	4.77201	10.5537	7.38396e-12	1.23765e-09	16.8874
ENSMUSG00000036931	1.93378	6.22114	10.4946	8.48225e-12	1.4078e-09	16.6713
ENSMUSG00000017421	-0.814064	7.71533	-10.4677	9.03563e-12	1.48509e-09	16.5921
ENSMUSG00000026349	-0.642011	6.80688	-10.4453	9.52639e-12	1.55069e-09	16.5181
ENSMUSG00000024276	-1.10012	5.72451	-10.4065	1.04384e-11	1.68297e-09	16.4433
ENSMUSG00000091227	-2.92218	0.479925	-10.3583	1.16997e-11	1.86853e-09	16.3948
ENSMUSG00000052477	2.6354	6.61848	10.2742	1.42816e-11	2.25956e-09	16.132
ENSMUSG00000073485	-1.94804	1.02197	-10.2369	1.56086e-11	2.44665e-09	16.29
ENSMUSG00000061510	-2.74288	0.566392	-10.2177	1.63386e-11	2.53758e-09	16.1446
ENSMUSG00000045954	2.56554	1.89165	10.2023	1.69524e-11	2.60898e-09	16.2694
ENSMUSG00000086568	-2.86808	0.455615	-10.1929	1.73344e-11	2.64373e-09	16.0103
ENSMUSG00000029919	-1.46985	3.66389	-10.169	1.8353e-11	2.77409e-09	16.0961
ENSMUSG00000046546	1.9334	6.37858	10.1498	1.92155e-11	2.87876e-09	15.8439
ENSMUSG00000085622	-1.88861	3.17673	-10.1107	2.11068e-11	3.12691e-09	15.9992
ENSMUSG00000086502	-1.50628	2.55657	-10.1064	2.13236e-11	3.12691e-09	16.0279
ENSMUSG00000026728	1.22008	8.43618	10.1044	2.1426e-11	3.12691e-09	15.7339
ENSMUSG00000022668	-0.779023	3.96833	-10.0902	2.21683e-11	3.20758e-09	15.8477
ENSMUSG00000052031	1.29122	5.12475	10.0702	2.32617e-11	3.33726e-09	15.6816
ENSMUSG00000028034	-1.00168	7.06223	-9.99418	2.79382e-11	3.9745e-09	15.4332
ENSMUSG00000046785	-0.96482	5.89134	-9.96512	2.99705e-11	4.22809e-09	15.3581
ENSMUSG00000024232	4.38979	0.818164	9.94928	3.11414e-11	4.35697e-09	15.2104
ENSMUSG00000053889	-2.03726	1.14866	-9.89839	3.52294e-11	4.88851e-09	15.546
ENSMUSG00000062014	-1.04206	6.63499	-9.84774	3.98437e-11	5.46663e-09	15.0688
ENSMUSG00000055872	-3.57593	-1.07172	-9.84571	4.00415e-11	5.46663e-09	14.94
ENSMUSG00000032487	8.53879	1.67038	9.83632	4.09674e-11	5.5483e-09	13.9739
ENSMUSG00000028793	0.825181	6.32472	9.79368	4.5455e-11	6.1072e-09	14.938
ENSMUSG00000038650	0.888911	6.03828	9.79014	4.58493e-11	6.11167e-09	14.9355
ENSMUSG00000004865	-0.90549	7.28394	-9.76522	4.87272e-11	6.44455e-09	14.8779
ENSMUSG00000020723	-1.67595	0.580787	-9.73806	5.20745e-11	6.83386e-09	15.1464
ENSMUSG00000097194	-2.61535	3.64053	-9.71765	5.47436e-11	7.12888e-09	15.0284
ENSMUSG00000049047	-0.875596	3.78512	-9.68977	5.86172e-11	7.57504e-09	14.8994
ENSMUSG00000085289	2.85039	1.36753	9.66697	6.19939e-11	7.95072e-09	14.8826
ENSMUSG00000052253	0.958355	5.96579	9.65994	6.30734e-11	7.97219e-09	14.618
ENSMUSG00000073455	-0.74304	4.41569	-9.65975	6.31032e-11	7.97219e-09	14.6435
ENSMUSG00000045140	-0.963436	3.38307	-9.63774	6.66138e-11	8.35337e-09	14.8011
ENSMUSG00000089726	-1.36612	3.61222	-9.63067	6.77831e-11	8.43749e-09	14.7384
ENSMUSG00000021701	4.09305	2.55944	9.62067	6.94735e-11	8.58479e-09	14.7817
ENSMUSG00000020385	-0.579955	6.45987	-9.60377	7.24277e-11	8.88499e-09	14.4595
ENSMUSG00000097052	-1.49465	2.55494	-9.54016	8.47481e-11	1.03216e-08	14.6563
ENSMUSG00000057666	0.561202	8.4252	9.53305	8.62535e-11	1.04299e-08	14.3001
ENSMUSG00000055926	2.26644	2.59033	9.52543	8.7895e-11	1.0553e-08	14.5381
ENSMUSG00000028937	1.11854	3.71653	9.5144	9.03284e-11	1.07688e-08	14.5277
ENSMUSG00000058755	2.021	4.10654	9.50595	9.22415e-11	1.092e-08	14.4831
ENSMUSG00000069237	-0.870775	4.81519	-9.50139	9.32881e-11	1.09672e-08	14.2871
ENSMUSG00000030157	-1.32262	5.78182	-9.49827	9.40138e-11	1.09763e-08	14.2303
ENSMUSG00000029245	-2.33497	1.46501	-9.48692	9.66967e-11	1.11399e-08	14.5596
ENSMUSG00000030614	-1.0831	3.57635	-9.48678	9.6731e-11	1.11399e-08	14.4238
ENSMUSG00000031613	-1.35319	4.49444	-9.48234	9.78013e-11	1.1187e-08	14.3127
ENSMUSG00000027281	-1.05415	3.57859	-9.45543	1.0456e-10	1.18799e-08	14.3361
ENSMUSG00000055148	1.79805	8.27304	9.43678	1.09523e-10	1.23608e-08	14.0808
ENSMUSG00000078122	-2.20358	2.34594	-9.41006	1.17055e-10	1.31233e-08	14.3369
ENSMUSG00000022114	1.96437	3.34396	9.39517	1.21482e-10	1.35301e-08	14.2532
ENSMUSG00000030342	0.948944	6.02236	9.36027	1.32534e-10	1.46644e-08	13.8614
ENSMUSG00000020994	-0.77162	7.14663	-9.34026	1.3933e-10	1.53163e-08	13.8099
ENSMUSG00000024197	0.84024	4.76813	9.31234	1.49411e-10	1.63186e-08	13.837
ENSMUSG00000031200	-1.58635	3.64298	-9.27824	1.6274e-10	1.76605e-08	13.854
ENSMUSG00000058385	3.22986	1.68112	9.25645	1.71887e-10	1.85342e-08	14.0014
ENSMUSG00000029642	0.726966	5.82967	9.24885	1.75202e-10	1.87722e-08	13.6029
ENSMUSG00000027829	0.691341	7.53968	9.22594	1.85585e-10	1.97595e-08	13.5286
ENSMUSG00000030214	0.922965	7.14533	9.17947	2.08623e-10	2.20737e-08	13.4004
ENSMUSG00000046223	1.30394	5.73523	9.16928	2.14057e-10	2.25079e-08	13.4223
ENSMUSG00000027398	2.37657	5.91858	9.1544	2.2225e-10	2.32251e-08	13.4159
ENSMUSG00000025794	0.541622	8.9831	9.13846	2.31377e-10	2.40306e-08	13.3438
ENSMUSG00000084283	-2.15427	0.0198103	-9.02075	3.11806e-10	3.21863e-08	13.302
ENSMUSG00000097375	-1.93885	1.31527	-9.01642	3.15255e-10	3.23452e-08	13.4063
ENSMUSG00000001025	1.81516	5.18247	8.98143	3.44614e-10	3.50125e-08	13.008
ENSMUSG00000053898	0.623431	5.60392	8.98055	3.45389e-10	3.50125e-08	12.9048
ENSMUSG00000058706	-0.796686	6.31368	-8.97483	3.50455e-10	3.53146e-08	12.866
ENSMUSG00000097015	-2.31153	-0.0736071	-8.96315	3.61047e-10	3.61667e-08	13.138
ENSMUSG00000096802	1.44449	2.51009	8.92454	3.9844e-10	3.96776e-08	13.1226
ENSMUSG00000035385	4.84383	-1.6947	8.90988	4.13645e-10	4.07749e-08	11.8822
ENSMUSG00000051451	-0.719913	6.35334	-8.90929	4.14276e-10	4.07749e-08	12.695
ENSMUSG00000030031	-1.25941	3.38425	-8.9068	4.16915e-10	4.07975e-08	12.9979
ENSMUSG00000034037	1.93085	0.529937	8.90017	4.24047e-10	4.11921e-08	13.1181
ENSMUSG00000095079	3.92098	7.16592	8.89667	4.27857e-10	4.11921e-08	12.7771
ENSMUSG00000002083	1.24715	3.48985	8.89244	4.32515e-10	4.11921e-08	12.9101
ENSMUSG00000003541	2.61881	2.63631	8.89155	4.335e-10	4.11921e-08	13.0532
ENSMUSG00000004535	-0.502055	7.95151	-8.89084	4.34294e-10	4.11921e-08	12.6821
ENSMUSG00000071456	-1.39499	3.24068	-8.88971	4.35548e-10	4.11921e-08	12.9499
ENSMUSG00000050530	3.04315	-0.745349	8.88543	4.40342e-10	4.14141e-08	12.7333
ENSMUSG00000053398	0.892209	5.99117	8.88167	4.44601e-10	4.15409e-08	12.6445
ENSMUSG00000055240	-1.08333	4.57814	-8.87964	4.46916e-10	4.15409e-08	12.7294
ENSMUSG00000046447	2.77608	3.18959	8.87778	4.49051e-10	4.15409e-08	12.9216
ENSMUSG00000087305	-1.30396	1.72225	-8.87559	4.51579e-10	4.15477e-08	13.0478
ENSMUSG00000059839	-0.841513	4.35491	-8.87297	4.54626e-10	4.1602e-08	12.742
ENSMUSG00000042202	-0.752536	5.52352	-8.86121	4.68532e-10	4.26439e-08	12.5948
ENSMUSG00000002346	-0.975659	4.21667	-8.8302	5.0731e-10	4.59265e-08	12.6173
ENSMUSG00000060036	0.574243	10.5172	8.81444	5.28264e-10	4.7422e-08	12.5681
ENSMUSG00000002058	0.969485	5.43452	8.81358	5.29432e-10	4.7422e-08	12.498
ENSMUSG00000059796	0.720474	7.63701	8.81051	5.33634e-10	4.75468e-08	12.4534
ENSMUSG00000028248	-0.679134	7.77883	-8.80263	5.44552e-10	4.82655e-08	12.4489
ENSMUSG00000026548	1.74871	3.0412	8.78259	5.73342e-10	5.05526e-08	12.6769
ENSMUSG00000089929	1.15693	4.93035	8.77182	5.89472e-10	5.17055e-08	12.453
ENSMUSG00000055531	-0.573934	7.15346	-8.7672	5.96513e-10	5.20535e-08	12.337
ENSMUSG00000023067	1.95476	2.39367	8.73161	6.5382e-10	5.67616e-08	12.6684
ENSMUSG00000054641	3.20846	1.9432	8.71932	6.74891e-10	5.8292e-08	12.6659
ENSMUSG00000044220	3.42821	-1.53192	8.70606	6.98402e-10	6.00165e-08	12.257
ENSMUSG00000015575	0.633357	5.80837	8.6722	7.62299e-10	6.51766e-08	12.1004
ENSMUSG00000047123	1.00687	5.07156	8.65664	7.93628e-10	6.75142e-08	12.1258
ENSMUSG00000098024	-2.23126	-0.373065	-8.62784	8.55131e-10	7.23826e-08	12.1995
ENSMUSG00000022365	0.568138	6.9588	8.59063	9.41826e-10	7.93243e-08	11.8714
ENSMUSG00000089756	-1.58871	3.56972	-8.57635	9.77456e-10	8.17838e-08	12.1164
ENSMUSG00000078700	-1.09833	2.77028	-8.57508	9.80691e-10	8.17838e-08	12.1709
ENSMUSG00000092474	1.84509	0.566083	8.56686	1.00188e-09	8.3141e-08	12.2607
ENSMUSG00000022037	1.66244	3.58506	8.56095	1.0174e-09	8.40171e-08	12.0957
ENSMUSG00000022440	1.57176	1.67897	8.54881	1.05005e-09	8.6293e-08	12.2253
ENSMUSG00000025804	1.30859	4.70528	8.52189	1.12635e-09	9.21159e-08	11.7739
ENSMUSG00000090069	2.4521	2.04574	8.50779	1.16853e-09	9.50511e-08	12.1293
ENSMUSG00000058260	-1.45586	2.98629	-8.50617	1.17347e-09	9.50511e-08	11.9468
ENSMUSG00000074629	-1.65746	1.17183	-8.50186	1.18675e-09	9.56688e-08	12.1151
ENSMUSG00000089844	1.92494	4.73574	8.49596	1.20516e-09	9.66929e-08	11.7461
ENSMUSG00000071192	2.72038	0.512433	8.45136	1.35413e-09	1.08132e-07	11.8304
ENSMUSG00000036376	0.767324	4.02014	8.43865	1.39993e-09	1.10651e-07	11.6803
ENSMUSG00000011752	0.651381	6.4515	8.43642	1.40811e-09	1.10651e-07	11.4606
ENSMUSG00000031770	0.849284	6.95959	8.43548	1.41159e-09	1.10651e-07	11.4583
ENSMUSG00000086047	-1.85444	0.246905	-8.43542	1.41181e-09	1.10651e-07	11.9107
ENSMUSG00000021866	0.642087	6.89777	8.42827	1.43847e-09	1.12221e-07	11.4393
ENSMUSG00000047604	0.953846	3.95367	8.42265	1.45983e-09	1.13364e-07	11.6379
ENSMUSG00000026407	2.10083	2.48075	8.41624	1.48455e-09	1.14758e-07	11.8448
ENSMUSG00000084911	-1.83077	1.92017	-8.4112	1.50428e-09	1.14991e-07	11.8304
ENSMUSG00000015568	-1.10088	5.22602	-8.41077	1.50597e-09	1.14991e-07	11.437
ENSMUSG00000026922	1.06805	3.73661	8.41027	1.50795e-09	1.14991e-07	11.6769
ENSMUSG00000034160	-0.665938	8.6793	-8.36878	1.68139e-09	1.27642e-07	11.3368
ENSMUSG00000085882	-2.40046	1.15005	-8.36075	1.71722e-09	1.2978e-07	11.6491
ENSMUSG00000014599	1.49141	4.33944	8.35056	1.76385e-09	1.32574e-07	11.403
ENSMUSG00000049404	4.23035	-2.13071	8.34926	1.76985e-09	1.32574e-07	11.1056
ENSMUSG00000023367	1.32296	3.78533	8.32809	1.87123e-09	1.39551e-07	11.491
ENSMUSG00000057375	0.692492	4.92935	8.324	1.89149e-09	1.40443e-07	11.2543
ENSMUSG00000059742	-1.35456	2.18471	-8.3211	1.90598e-09	1.40901e-07	11.6197
ENSMUSG00000028675	-0.626445	6.74523	-8.30963	1.96443e-09	1.44523e-07	11.1201
ENSMUSG00000022240	-1.4992	2.04691	-8.30816	1.97205e-09	1.44523e-07	11.5681
ENSMUSG00000024384	-0.610409	6.58493	-8.30166	2.00608e-09	1.46383e-07	11.0992
ENSMUSG00000049606	-0.796815	5.63066	-8.28546	2.0936e-09	1.51723e-07	11.0757
ENSMUSG00000045248	0.688443	4.31111	8.28482	2.09718e-09	1.51723e-07	11.2435
ENSMUSG00000066760	-0.587707	6.10029	-8.2767	2.14254e-09	1.54345e-07	11.0338
ENSMUSG00000040152	1.51769	3.87971	8.25485	2.26976e-09	1.62817e-07	11.3062
ENSMUSG00000048878	0.688137	6.03276	8.2497	2.30088e-09	1.64353e-07	10.968
ENSMUSG00000097277	-1.55634	2.23534	-8.2457	2.32532e-09	1.654e-07	11.4175
ENSMUSG00000091705	1.10182	4.18724	8.21115	2.54774e-09	1.80463e-07	10.8779
ENSMUSG00000050890	-0.970269	4.64255	-8.19801	2.63792e-09	1.86072e-07	10.9224
ENSMUSG00000023010	0.432284	8.82194	8.13944	3.08116e-09	2.16435e-07	10.7231
ENSMUSG00000022205	0.718647	6.76767	8.13192	3.14329e-09	2.19887e-07	10.6511
ENSMUSG00000053062	2.81024	-0.355134	8.11921	3.25124e-09	2.26503e-07	11.0257
ENSMUSG00000016637	0.950163	4.11957	8.10688	3.35967e-09	2.33098e-07	10.7566
ENSMUSG00000003283	1.29378	7.01466	8.10017	3.42016e-09	2.36326e-07	10.5725
ENSMUSG00000002996	-0.580894	6.66933	-8.09517	3.46592e-09	2.38514e-07	10.5486
ENSMUSG00000020077	0.870219	8.19685	8.0931	3.48509e-09	2.38863e-07	10.577
ENSMUSG00000042682	0.599255	5.63843	8.08374	3.57296e-09	2.43897e-07	10.5406
ENSMUSG00000097290	-0.65716	4.47346	-8.07849	3.62327e-09	2.46338e-07	10.6184
ENSMUSG00000048546	1.06607	6.87326	8.06492	3.75665e-09	2.54385e-07	10.4712
ENSMUSG00000005506	-0.528724	7.80739	-8.06233	3.78267e-09	2.55127e-07	10.4893
ENSMUSG00000035399	0.626727	5.38418	8.05396	3.86799e-09	2.59846e-07	10.4825
ENSMUSG00000074406	0.611953	4.98009	8.04732	3.93712e-09	2.63445e-07	10.5123
ENSMUSG00000003970	0.604519	10.1089	8.03272	4.09349e-09	2.7283e-07	10.4868
ENSMUSG00000030711	1.62038	1.38454	8.02106	4.22295e-09	2.80355e-07	10.8679
ENSMUSG00000090252	2.08538	3.4018	8.00827	4.36963e-09	2.88959e-07	10.587
ENSMUSG00000029173	-0.548309	4.61823	-7.96771	4.87035e-09	3.20818e-07	10.3188
ENSMUSG00000056418	-2.05978	2.14446	-7.94212	5.21575e-09	3.41805e-07	10.632
ENSMUSG00000020053	-1.53098	4.07407	-7.94115	5.22934e-09	3.41805e-07	10.3426
ENSMUSG00000034163	-0.59088	6.76207	-7.93564	5.30721e-09	3.45561e-07	10.1186
ENSMUSG00000051439	2.06041	3.8122	7.93259	5.35082e-09	3.47065e-07	10.4154
ENSMUSG00000007029	0.81102	8.9113	7.92508	5.45961e-09	3.5277e-07	10.1546
ENSMUSG00000023904	0.682628	4.0874	7.91933	5.54442e-09	3.56888e-07	10.3013
ENSMUSG00000028676	-0.512121	7.29855	-7.91125	5.66601e-09	3.63333e-07	10.065
ENSMUSG00000032640	0.921118	6.41929	7.90677	5.73449e-09	3.66036e-07	10.0429
ENSMUSG00000016528	0.660741	7.07503	7.90567	5.7514e-09	3.66036e-07	10.0415
ENSMUSG00000068120	0.686273	6.61682	7.88256	6.11978e-09	3.88021e-07	9.97401
ENSMUSG00000026011	2.82934	4.0681	7.87925	6.17446e-09	3.90028e-07	10.313
ENSMUSG00000041633	-1.33869	2.328	-7.87258	6.28605e-09	3.95601e-07	10.3745
ENSMUSG00000027447	1.06368	7.44103	7.86273	6.45483e-09	4.04718e-07	9.93509
ENSMUSG00000031431	2.07264	8.27064	7.84725	6.72929e-09	4.2037e-07	9.90751
ENSMUSG00000029455	0.785212	8.16213	7.84576	6.75638e-09	4.2051e-07	9.91329
ENSMUSG00000024993	-0.589129	4.48219	-7.8411	6.8417e-09	4.24261e-07	9.97017
ENSMUSG00000042677	1.17509	5.67044	7.83495	6.95598e-09	4.29773e-07	9.88338
ENSMUSG00000032076	-1.24873	4.70991	-7.83309	6.99076e-09	4.30351e-07	9.96197
ENSMUSG00000000326	-2.09507	7.605	-7.83086	7.03291e-09	4.31377e-07	9.87836
ENSMUSG00000021279	1.01758	4.78119	7.82687	7.10888e-09	4.33673e-07	9.91914
ENSMUSG00000086322	2.27218	0.793634	7.82621	7.12158e-09	4.33673e-07	10.3349
ENSMUSG00000027540	0.755507	7.94678	7.82316	7.18031e-09	4.34515e-07	9.84191
ENSMUSG00000022895	1.32506	5.5982	7.82283	7.18672e-09	4.34515e-07	9.85027
ENSMUSG00000027800	4.16459	-0.958388	7.82053	7.23137e-09	4.35658e-07	9.84656
ENSMUSG00000001473	1.09171	3.02045	7.81854	7.27038e-09	4.36455e-07	10.1905
ENSMUSG00000058503	-0.648516	4.56059	-7.79281	7.79268e-09	4.66157e-07	9.84679
ENSMUSG00000026223	0.759573	6.27131	7.78842	7.88538e-09	4.70041e-07	9.72273
ENSMUSG00000022346	1.17984	6.73711	7.78344	7.99212e-09	4.74732e-07	9.7113
ENSMUSG00000038459	0.676045	4.55763	7.77916	8.08512e-09	4.77204e-07	9.82229
ENSMUSG00000027995	1.04875	4.34064	7.77893	8.09011e-09	4.77204e-07	9.87533
ENSMUSG00000015053	2.38881	2.76601	7.75956	8.52461e-09	5.01087e-07	10.0838
ENSMUSG00000030737	-1.82725	3.31795	-7.74569	8.85017e-09	5.17419e-07	9.98239
ENSMUSG00000063229	0.48454	7.82408	7.74513	8.86358e-09	5.17419e-07	9.62104
ENSMUSG00000066613	-0.861058	4.20931	-7.73736	9.05183e-09	5.26593e-07	9.80758
ENSMUSG00000030695	0.659036	8.13698	7.728	9.28389e-09	5.38243e-07	9.58376
ENSMUSG00000076587	4.87444	5.21703	7.72294	9.4118e-09	5.43796e-07	9.77211
ENSMUSG00000079179	0.684897	5.07501	7.70526	9.87332e-09	5.68522e-07	9.55992
ENSMUSG00000028180	-0.734378	6.12061	-7.69429	1.01712e-08	5.83691e-07	9.45989
ENSMUSG00000032294	0.651213	8.2448	7.69207	1.02325e-08	5.85221e-07	9.48137
ENSMUSG00000033585	3.29741	-2.26257	7.68765	1.0356e-08	5.90293e-07	9.63825
ENSMUSG00000019194	1.59531	1.02982	7.68289	1.04902e-08	5.95937e-07	9.9987
ENSMUSG00000037997	-0.586262	5.2419	-7.68156	1.05282e-08	5.96096e-07	9.47706
ENSMUSG00000020832	-0.817565	4.63718	-7.67431	1.07373e-08	6.05887e-07	9.50174
ENSMUSG00000034855	1.57827	1.97859	7.67309	1.07728e-08	6.05887e-07	9.9188
ENSMUSG00000078503	-1.21547	2.10509	-7.66459	1.10243e-08	6.17982e-07	9.46219
ENSMUSG00000096931	-1.59422	1.5206	-7.66104	1.11308e-08	6.21892e-07	9.86302
ENSMUSG00000068220	0.902886	5.51305	7.6554	1.13025e-08	6.29407e-07	9.39134
ENSMUSG00000020857	0.842282	6.69014	7.65402	1.13451e-08	6.29709e-07	9.35225
ENSMUSG00000097583	-2.3139	-0.709087	-7.65006	1.14675e-08	6.34421e-07	9.76683
ENSMUSG00000035367	-0.698377	5.26971	-7.64239	1.17088e-08	6.45664e-07	9.37323
ENSMUSG00000036427	0.629639	8.13694	7.63925	1.18093e-08	6.49089e-07	9.33759
ENSMUSG00000052712	0.602745	5.86094	7.63209	1.20412e-08	6.59692e-07	9.29709
ENSMUSG00000047694	-0.702957	5.30506	-7.62884	1.21479e-08	6.63393e-07	9.3114
ENSMUSG00000090936	-2.27459	-0.363422	-7.62196	1.23774e-08	6.73751e-07	9.7757
ENSMUSG00000003484	1.48048	6.15712	7.60791	1.28594e-08	6.97744e-07	9.26474
ENSMUSG00000040688	0.471734	5.16528	7.59994	1.31413e-08	7.10762e-07	9.26923
ENSMUSG00000037605	-1.90104	1.32294	-7.5943	1.33443e-08	7.19447e-07	9.75418
ENSMUSG00000004842	-1.90811	1.00112	-7.58942	1.35228e-08	7.26365e-07	9.74453
ENSMUSG00000014769	0.490992	6.6899	7.58845	1.35585e-08	7.26365e-07	9.17026
ENSMUSG00000022234	0.428315	7.94277	7.58572	1.36595e-08	7.2947e-07	9.19413
ENSMUSG00000037169	3.53145	-0.382989	7.57793	1.39523e-08	7.42765e-07	9.66859
ENSMUSG00000079455	1.81319	4.53294	7.5716	1.41951e-08	7.53318e-07	9.2528
ENSMUSG00000002981	0.38183	6.74344	7.55801	1.47307e-08	7.7799e-07	9.08755
ENSMUSG00000071324	2.58535	1.09735	7.55748	1.47519e-08	7.7799e-07	9.63512
ENSMUSG00000050578	-4.37196	-1.81781	-7.55361	1.49082e-08	7.83793e-07	9.16344
ENSMUSG00000048379	-0.614749	6.58624	-7.54875	1.51074e-08	7.90592e-07	9.06176
ENSMUSG00000040128	0.859687	7.12755	7.54817	1.51309e-08	7.90592e-07	9.06978
ENSMUSG00000063524	0.613649	7.51721	7.54179	1.53966e-08	8.01999e-07	9.04202
ENSMUSG00000079144	-1.08962	4.00742	-7.5372	1.55905e-08	8.08163e-07	9.2216
ENSMUSG00000025579	0.465936	5.77176	7.53674	1.56105e-08	8.08163e-07	9.04096
ENSMUSG00000097061	-1.3746	2.50316	-7.53408	1.57238e-08	8.11548e-07	9.458
ENSMUSG00000097536	-1.60942	2.20097	-7.5301	1.58957e-08	8.17928e-07	9.45886
ENSMUSG00000097944	-1.65098	1.57212	-7.52514	1.61122e-08	8.26555e-07	9.55016
ENSMUSG00000021891	-0.454728	4.27197	-7.51028	1.67796e-08	8.58193e-07	9.12435
ENSMUSG00000022309	2.00628	2.48241	7.5063	1.6963e-08	8.64962e-07	9.36066
ENSMUSG00000038375	1.34106	4.07983	7.49739	1.73808e-08	8.83604e-07	9.1514
ENSMUSG00000019872	0.766995	6.24246	7.49536	1.74777e-08	8.85866e-07	8.92092
ENSMUSG00000044338	2.45582	-1.02652	7.48229	1.81133e-08	9.15344e-07	9.30521
ENSMUSG00000052291	-1.51166	1.8605	-7.4752	1.8468e-08	9.30489e-07	9.39112
ENSMUSG00000020644	0.748958	6.07026	7.47248	1.86061e-08	9.34665e-07	8.85889
ENSMUSG00000057143	-0.557206	6.33974	-7.46903	1.8782e-08	9.40712e-07	8.84339
ENSMUSG00000024014	1.32087	7.40909	7.46585	1.89462e-08	9.46138e-07	8.86011
ENSMUSG00000035293	-1.29985	4.89696	-7.46088	1.92058e-08	9.56281e-07	8.88318
ENSMUSG00000020423	0.507408	8.4396	7.44858	1.98636e-08	9.8613e-07	8.83517
ENSMUSG00000025268	1.35106	1.66048	7.4475	1.99225e-08	9.86165e-07	9.32174
ENSMUSG00000023886	1.68844	0.194825	7.4445	2.00868e-08	9.91399e-07	9.315
ENSMUSG00000029595	-2.11955	-0.418632	-7.43503	2.06145e-08	1.01449e-06	9.30425
ENSMUSG00000002504	1.53077	1.477	7.42225	2.13495e-08	1.04761e-06	9.22069
ENSMUSG00000046324	-0.528071	6.01709	-7.41424	2.18235e-08	1.06587e-06	8.69027
ENSMUSG00000063273	-0.469802	6.82063	-7.41383	2.18476e-08	1.06587e-06	8.69043
ENSMUSG00000025130	0.503823	7.80299	7.4121	2.19518e-08	1.06788e-06	8.70841
ENSMUSG00000029322	1.01163	7.82529	7.40772	2.22171e-08	1.07769e-06	8.7022
ENSMUSG00000006386	2.9943	-0.654294	7.405	2.23835e-08	1.08266e-06	9.18085
ENSMUSG00000098274	0.553137	8.48509	7.39512	2.29983e-08	1.10681e-06	8.68251
ENSMUSG00000072653	-0.815264	3.67266	-7.39488	2.30137e-08	1.10681e-06	8.89823
ENSMUSG00000031483	-0.403008	5.44207	-7.39068	2.32803e-08	1.11646e-06	8.6604
ENSMUSG00000004359	-1.01093	5.33962	-7.38601	2.35805e-08	1.12767e-06	8.64732
ENSMUSG00000022091	1.44817	2.10631	7.38143	2.38792e-08	1.13874e-06	9.1138
ENSMUSG00000048621	1.25635	4.63678	7.37824	2.40892e-08	1.14283e-06	8.75466
ENSMUSG00000042992	0.780719	2.92757	7.37808	2.41001e-08	1.14283e-06	9.04571
ENSMUSG00000089998	-3.39728	0.252992	-7.37254	2.44696e-08	1.15711e-06	9.17781
ENSMUSG00000018196	-0.487955	4.40656	-7.36115	2.52475e-08	1.19057e-06	8.70169
ENSMUSG00000057894	-1.12988	5.10908	-7.35899	2.53977e-08	1.19433e-06	8.60816
ENSMUSG00000068854	-1.48326	3.91334	-7.34866	2.61287e-08	1.22326e-06	8.69955
ENSMUSG00000085794	-1.56645	0.113895	-7.34696	2.62511e-08	1.22326e-06	9.10736
ENSMUSG00000097729	-1.04609	5.11291	-7.34622	2.63046e-08	1.22326e-06	8.5622
ENSMUSG00000071713	1.16328	6.60616	7.34559	2.63504e-08	1.22326e-06	8.50614
ENSMUSG00000031618	1.79142	2.8902	7.34526	2.63743e-08	1.22326e-06	8.88346
ENSMUSG00000027122	-0.68273	4.3835	-7.33315	2.72674e-08	1.26027e-06	8.62071
ENSMUSG00000089652	2.44936	1.62396	7.33244	2.73211e-08	1.26027e-06	9.0367
ENSMUSG00000046768	1.74231	-0.348914	7.32892	2.75869e-08	1.26907e-06	9.00944
ENSMUSG00000038274	1.22694	8.87385	7.32434	2.79369e-08	1.28169e-06	8.49061
ENSMUSG00000038550	1.80426	1.92909	7.31134	2.8955e-08	1.32481e-06	8.96462
ENSMUSG00000051343	1.00436	2.76803	7.31004	2.90585e-08	1.32596e-06	8.83044
ENSMUSG00000020044	2.53494	1.05884	7.30197	2.97118e-08	1.35212e-06	8.98112
ENSMUSG00000037211	2.18033	1.35463	7.29872	2.99784e-08	1.3606e-06	8.98492
ENSMUSG00000074075	2.66599	-0.895857	7.2863	3.10228e-08	1.4039e-06	8.80806
ENSMUSG00000097634	1.70265	4.32102	7.28541	3.10983e-08	1.4039e-06	8.56875
ENSMUSG00000097379	-1.76502	1.05628	-7.28166	3.14217e-08	1.41473e-06	8.93888
ENSMUSG00000045767	-0.581726	6.59088	-7.2793	3.1627e-08	1.41921e-06	8.31461
ENSMUSG00000004044	1.61577	0.903185	7.27794	3.17456e-08	1.41921e-06	8.88982
ENSMUSG00000014867	0.48899	7.06773	7.27763	3.17727e-08	1.41921e-06	8.31564
ENSMUSG00000097571	-1.39724	1.50315	-7.27435	3.20616e-08	1.42835e-06	8.86175
ENSMUSG00000023495	1.29454	2.75841	7.26945	3.24976e-08	1.44397e-06	8.7452
ENSMUSG00000022500	0.773406	5.25871	7.26441	3.29528e-08	1.45843e-06	8.34894
ENSMUSG00000002204	1.11479	7.92124	7.26394	3.29953e-08	1.45843e-06	8.30152
ENSMUSG00000056851	0.440351	8.56317	7.26221	3.31529e-08	1.46157e-06	8.31776
ENSMUSG00000042178	0.557512	4.95098	7.25834	3.35092e-08	1.47345e-06	8.35493
ENSMUSG00000037475	-0.633885	6.96439	-7.25536	3.37859e-08	1.48176e-06	8.25502
ENSMUSG00000072640	-0.781222	4.35739	-7.24615	3.46556e-08	1.51598e-06	8.36131
ENSMUSG00000080727	-1.54337	1.69806	-7.23148	3.60887e-08	1.5746e-06	8.77384
ENSMUSG00000096262	-0.868861	3.14313	-7.22645	3.65939e-08	1.59254e-06	8.55761
ENSMUSG00000069206	-0.995194	3.44839	-7.2104	3.82533e-08	1.66049e-06	8.52268
ENSMUSG00000022617	0.716435	6.45357	7.20934	3.83649e-08	1.66107e-06	8.122
ENSMUSG00000097151	-1.12541	1.98718	-7.20533	3.87933e-08	1.67534e-06	8.61758
ENSMUSG00000024219	0.582822	5.27119	7.2044	3.88931e-08	1.67537e-06	8.16141
ENSMUSG00000028664	-1.39879	1.099	-7.20103	3.92566e-08	1.68674e-06	8.7022
ENSMUSG00000097785	-2.31673	-0.403646	-7.19992	3.93773e-08	1.68764e-06	8.58043
ENSMUSG00000036067	1.01599	3.7393	7.19799	3.95883e-08	1.6924e-06	8.41607
ENSMUSG00000018379	-0.798325	8.27546	-7.18996	4.04775e-08	1.72243e-06	8.11711
ENSMUSG00000002550	0.637723	5.62068	7.18936	4.05448e-08	1.72243e-06	8.09823
ENSMUSG00000061477	1.177	7.69234	7.1889	4.05961e-08	1.72243e-06	8.07055
ENSMUSG00000052673	1.41039	1.96258	7.18291	4.12745e-08	1.74684e-06	8.62551
ENSMUSG00000030729	-0.884094	5.01274	-7.1782	4.18162e-08	1.76535e-06	8.09611
ENSMUSG00000032125	2.15441	-0.309269	7.16704	4.31292e-08	1.81625e-06	8.63422
ENSMUSG00000092558	-0.653663	5.33776	-7.16113	4.38403e-08	1.84162e-06	8.02681
ENSMUSG00000039953	0.567526	4.87177	7.15101	4.50866e-08	1.88928e-06	8.00938
ENSMUSG00000073437	-0.96993	3.6696	-7.14874	4.53713e-08	1.89557e-06	8.203
ENSMUSG00000086877	-1.91423	0.643457	-7.14748	4.55297e-08	1.89557e-06	8.58033
ENSMUSG00000048707	0.737051	3.88499	7.14714	4.55726e-08	1.89557e-06	8.20299
ENSMUSG00000003949	1.93146	0.437179	7.14517	4.58223e-08	1.90129e-06	8.57572
ENSMUSG00000087277	2.87318	-1.46218	7.14146	4.62961e-08	1.9151e-06	8.10752
ENSMUSG00000086924	-2.94443	-1.94426	-7.1408	4.63814e-08	1.9151e-06	8.19068
ENSMUSG00000055897	-0.585893	4.6789	-7.13583	4.70248e-08	1.93345e-06	8.0268
ENSMUSG00000021189	-0.536916	5.57442	-7.1356	4.70542e-08	1.93345e-06	7.94102
ENSMUSG00000029810	1.2615	4.63834	7.13332	4.7353e-08	1.94101e-06	8.10967
ENSMUSG00000081512	-1.30879	2.41338	-7.12996	4.77963e-08	1.95445e-06	8.30615
ENSMUSG00000091996	1.84169	1.30058	7.12623	4.82926e-08	1.96889e-06	8.51796
ENSMUSG00000019828	-2.41461	-1.11986	-7.12557	4.83819e-08	1.96889e-06	8.41327
ENSMUSG00000011263	2.23896	-0.975612	7.11462	4.98732e-08	2.02471e-06	8.41258
ENSMUSG00000067942	-0.719288	4.68276	-7.11135	5.03279e-08	2.03828e-06	7.97081
ENSMUSG00000031788	1.40233	3.19111	7.10791	5.08112e-08	2.05294e-06	8.16528
ENSMUSG00000043140	-0.580887	4.43916	-7.10275	5.1544e-08	2.0762e-06	7.96694
ENSMUSG00000076613	4.5222	6.22918	7.10213	5.16322e-08	2.0762e-06	8.222
ENSMUSG00000046916	2.95054	-0.0287163	7.0958	5.25475e-08	2.108e-06	8.42144
ENSMUSG00000037706	0.670392	6.64397	7.08009	5.48922e-08	2.19686e-06	7.76085
ENSMUSG00000020372	0.607744	10.2108	7.06823	5.67312e-08	2.26392e-06	7.83966
ENSMUSG00000021306	1.27603	5.77087	7.06682	5.69529e-08	2.26392e-06	7.75249
ENSMUSG00000034648	4.35315	-1.56716	7.06659	5.69904e-08	2.26392e-06	7.82822
ENSMUSG00000012848	0.709542	9.30854	7.06588	5.71029e-08	2.26392e-06	7.79377
ENSMUSG00000045665	0.719254	4.95212	7.05879	5.82392e-08	2.30358e-06	7.81234
ENSMUSG00000026547	0.722625	7.55917	7.05638	5.86316e-08	2.31369e-06	7.71019
ENSMUSG00000074029	-1.84752	0.390695	-7.04757	6.00857e-08	2.36556e-06	8.3123
ENSMUSG00000023963	1.44318	3.97006	7.04667	6.02358e-08	2.36597e-06	7.82678
ENSMUSG00000094936	-0.558774	4.48453	-7.04533	6.04615e-08	2.36934e-06	7.80593
ENSMUSG00000051790	1.36736	2.08962	7.03624	6.20091e-08	2.41997e-06	8.13855
ENSMUSG00000059897	-0.911655	3.11798	-7.03606	6.20396e-08	2.41997e-06	8.01495
ENSMUSG00000016529	4.44766	0.672119	7.03051	6.30066e-08	2.45204e-06	8.24198
ENSMUSG00000090330	-0.950839	4.19125	-7.02895	6.32799e-08	2.45703e-06	7.77951
ENSMUSG00000085822	-3.86416	-2.98591	-7.02673	6.36734e-08	2.46278e-06	7.60786
ENSMUSG00000097418	-1.90621	0.157734	-7.02647	6.3719e-08	2.46278e-06	8.25835
ENSMUSG00000090907	-3.18767	-2.3782	-7.0235	6.4247e-08	2.47351e-06	7.69123
ENSMUSG00000061410	1.67929	1.28172	7.02266	6.43982e-08	2.47351e-06	8.20134
ENSMUSG00000033906	-1.03029	3.22926	-7.02245	6.44349e-08	2.47351e-06	7.90179
ENSMUSG00000091183	-1.59224	1.53296	-7.019	6.50577e-08	2.49177e-06	8.17262
ENSMUSG00000078889	-1.40679	2.84995	-7.01377	6.60121e-08	2.52262e-06	7.99487
ENSMUSG00000092274	-0.88734	8.7661	-7.01213	6.63149e-08	2.52848e-06	7.64486
ENSMUSG00000018476	0.829956	6.97992	7.00717	6.72378e-08	2.55321e-06	7.56354
ENSMUSG00000054612	1.87382	1.42816	7.00674	6.73176e-08	2.55321e-06	8.10925
ENSMUSG00000001240	2.64253	1.57961	7.00622	6.74159e-08	2.55321e-06	8.19779
ENSMUSG00000022371	-3.75342	3.36461	-7.00262	6.80955e-08	2.57319e-06	7.97324
ENSMUSG00000079426	0.520959	6.92638	6.99966	6.86577e-08	2.58866e-06	7.53561
ENSMUSG00000040659	0.640687	6.65099	6.99881	6.88222e-08	2.58909e-06	7.53231
ENSMUSG00000038622	0.541638	4.10624	6.99691	6.91871e-08	2.59705e-06	7.73556
ENSMUSG00000034438	-1.46139	4.41591	-6.99073	7.03877e-08	2.63627e-06	7.74534
ENSMUSG00000026475	2.89117	1.62456	6.98633	7.12571e-08	2.66294e-06	8.15101
ENSMUSG00000039159	-0.768769	7.50745	-6.98421	7.16804e-08	2.66825e-06	7.51294
ENSMUSG00000025907	-0.75216	6.28522	-6.98365	7.17912e-08	2.66825e-06	7.48892
ENSMUSG00000028184	1.40017	2.96322	6.98325	7.18719e-08	2.66825e-06	7.93193
ENSMUSG00000006360	1.37527	6.29332	6.9789	7.2748e-08	2.69486e-06	7.49779
ENSMUSG00000027881	-0.591035	7.61452	-6.96916	7.47524e-08	2.75813e-06	7.47188
ENSMUSG00000032997	0.887518	3.86697	6.96902	7.47818e-08	2.75813e-06	7.74258
ENSMUSG00000049090	-0.423073	5.5975	-6.95983	7.67239e-08	2.82347e-06	7.44674
ENSMUSG00000052534	2.26672	3.36569	6.95907	7.68869e-08	2.82347e-06	7.9083
ENSMUSG00000047583	-1.06524	2.33233	-6.95024	7.88055e-08	2.88766e-06	7.90635
ENSMUSG00000032353	0.704532	4.77186	6.94497	7.99734e-08	2.92412e-06	7.48563
ENSMUSG00000024290	-0.533337	7.5223	-6.94201	8.06361e-08	2.942e-06	7.393
ENSMUSG00000036572	-0.519312	5.67277	-6.94078	8.09143e-08	2.9458e-06	7.3764
ENSMUSG00000022312	0.521	7.7639	6.93896	8.13254e-08	2.95442e-06	7.38869
ENSMUSG00000042265	2.07855	3.19869	6.93651	8.18841e-08	2.96834e-06	7.8112
ENSMUSG00000098702	-1.00324	1.95897	-6.93271	8.27583e-08	2.99362e-06	7.86041
ENSMUSG00000074024	-1.40918	2.18114	-6.92971	8.34536e-08	3.01234e-06	7.86327
ENSMUSG00000090112	-0.887289	5.72476	-6.92769	8.39264e-08	3.02296e-06	7.36099
ENSMUSG00000006389	2.40961	1.68714	6.91894	8.60027e-08	3.09117e-06	7.90911
ENSMUSG00000002222	-0.526194	7.28848	-6.91554	8.68243e-08	3.11409e-06	7.31735
ENSMUSG00000024735	0.352539	6.6932	6.91242	8.75853e-08	3.13474e-06	7.28888
ENSMUSG00000037573	0.948458	4.48218	6.90301	8.99191e-08	3.20526e-06	7.43904
ENSMUSG00000058670	-4.07774	-2.42462	-6.90295	8.99343e-08	3.20526e-06	7.5044
ENSMUSG00000082088	2.06864	1.4173	6.8999	9.07049e-08	3.22593e-06	7.87263
ENSMUSG00000068036	0.910092	4.14046	6.87525	9.71819e-08	3.44904e-06	7.36992
ENSMUSG00000022246	1.75192	0.496867	6.87266	9.78869e-08	3.46679e-06	7.83454
ENSMUSG00000020178	1.28083	4.78557	6.87029	9.8539e-08	3.4826e-06	7.29078
ENSMUSG00000070814	-0.775079	2.79527	-6.84997	1.04308e-07	3.67637e-06	7.52352
ENSMUSG00000028798	0.437006	6.78372	6.84947	1.04456e-07	3.67637e-06	7.11329
ENSMUSG00000026211	3.39143	-1.94103	6.84192	1.06688e-07	3.74713e-06	7.62864
ENSMUSG00000008318	0.721734	5.79178	6.8409	1.06995e-07	3.75014e-06	7.10066
ENSMUSG00000024885	0.755273	4.79722	6.84002	1.07259e-07	3.75163e-06	7.19802
ENSMUSG00000073866	-2.03805	-0.770529	-6.83625	1.08398e-07	3.78365e-06	7.70029
ENSMUSG00000028173	0.922775	4.85496	6.83135	1.09896e-07	3.82805e-06	7.18515
ENSMUSG00000090622	-1.53701	-0.204789	-6.83042	1.10182e-07	3.83013e-06	7.67965
ENSMUSG00000024732	0.471371	4.39746	6.82468	1.1197e-07	3.88432e-06	7.212
ENSMUSG00000051864	0.679917	5.35999	6.82172	1.12904e-07	3.90871e-06	7.08371
ENSMUSG00000052752	0.352861	6.79547	6.81762	1.1421e-07	3.94583e-06	7.02135
ENSMUSG00000029413	0.763926	5.62573	6.81034	1.16565e-07	4.019e-06	7.04374
ENSMUSG00000005087	0.469215	7.65806	6.80764	1.17451e-07	4.04054e-06	7.01247
ENSMUSG00000025283	0.616116	7.50806	6.80697	1.17672e-07	4.04054e-06	7.00886
ENSMUSG00000029064	0.395475	7.85482	6.80626	1.17906e-07	4.04054e-06	7.01772
ENSMUSG00000043439	1.26616	3.01592	6.80406	1.18636e-07	4.05737e-06	7.38854
ENSMUSG00000097090	-1.72805	0.69601	-6.80033	1.19885e-07	4.09181e-06	7.64739
ENSMUSG00000056737	0.851435	7.28715	6.79615	1.21298e-07	4.13169e-06	6.97486
ENSMUSG00000028557	-1.66084	5.69595	-6.79527	1.21598e-07	4.13359e-06	6.97194
ENSMUSG00000074794	-0.909311	5.84564	-6.79443	1.21887e-07	4.13511e-06	6.9607
ENSMUSG00000043279	-0.718186	7.80935	-6.79008	1.23383e-07	4.17749e-06	6.97686
ENSMUSG00000097346	0.760901	6.3711	6.78848	1.2394e-07	4.18798e-06	6.98734
ENSMUSG00000024121	0.65256	6.50597	6.78583	1.24863e-07	4.20764e-06	6.94579
ENSMUSG00000044968	-0.799738	2.27885	-6.78539	1.25019e-07	4.20764e-06	7.41714
ENSMUSG00000060657	-0.452149	7.24481	-6.77553	1.28529e-07	4.31516e-06	6.91481
ENSMUSG00000015882	-0.903358	3.57168	-6.77499	1.28723e-07	4.31516e-06	7.19777
ENSMUSG00000012076	-0.578679	4.40546	-6.77382	1.29145e-07	4.32073e-06	7.03828
ENSMUSG00000030630	1.6322	3.44909	6.77298	1.29453e-07	4.32249e-06	7.16206
ENSMUSG00000032340	1.71846	1.66064	6.7644	1.32608e-07	4.41913e-06	7.42165
ENSMUSG00000025875	1.34963	2.49819	6.76244	1.33341e-07	4.42673e-06	7.41174
ENSMUSG00000039585	-1.00422	5.68588	-6.76239	1.33359e-07	4.42673e-06	6.89331
ENSMUSG00000001794	0.428169	6.94147	6.76162	1.3365e-07	4.4277e-06	6.86769
ENSMUSG00000000600	-0.458734	5.57199	-6.75077	1.37786e-07	4.55581e-06	6.84981
ENSMUSG00000036733	0.562946	5.96362	6.74972	1.38195e-07	4.56043e-06	6.84468
ENSMUSG00000001229	0.426237	6.05244	6.74741	1.39094e-07	4.58117e-06	6.82918
ENSMUSG00000032184	1.34406	2.75255	6.74131	1.415e-07	4.65138e-06	7.20496
ENSMUSG00000024353	0.813273	6.95665	6.73863	1.4257e-07	4.67745e-06	6.80659
ENSMUSG00000037003	2.15209	0.691872	6.73363	1.44589e-07	4.73451e-06	7.46194
ENSMUSG00000019132	-0.364936	8.41209	-6.72631	1.47595e-07	4.82364e-06	6.81658
ENSMUSG00000035901	0.398534	6.96165	6.72294	1.49e-07	4.86014e-06	6.76053
ENSMUSG00000025508	0.789372	8.69282	6.71452	1.52574e-07	4.96208e-06	6.7822
ENSMUSG00000001227	2.05847	2.20879	6.71394	1.5282e-07	4.96208e-06	7.25972
ENSMUSG00000002980	3.62891	-0.0556939	6.7133	1.53098e-07	4.96208e-06	7.24062
ENSMUSG00000026573	1.34403	2.04322	6.71284	1.53297e-07	4.96208e-06	7.33383
ENSMUSG00000032207	1.67983	3.40401	6.71126	1.5398e-07	4.97468e-06	6.98056
ENSMUSG00000028753	-2.55882	-2.20687	-6.70573	1.56392e-07	5.04298e-06	6.99627
ENSMUSG00000030043	-1.81122	-0.0878987	-6.70206	1.58019e-07	5.08574e-06	7.38626
ENSMUSG00000035354	0.834	6.88709	6.69938	1.59217e-07	5.11457e-06	6.69275
ENSMUSG00000048807	1.72817	1.62235	6.69428	1.61515e-07	5.17049e-06	7.32809
ENSMUSG00000025584	0.879897	4.4591	6.69417	1.61568e-07	5.17049e-06	6.81294
ENSMUSG00000078838	-1.92148	-1.0161	-6.69125	1.62899e-07	5.20326e-06	7.30965
ENSMUSG00000013846	0.446055	7.7347	6.6889	1.63983e-07	5.22799e-06	6.68921
ENSMUSG00000033032	2.18335	0.135232	6.68256	1.66935e-07	5.31211e-06	7.33247
ENSMUSG00000021576	0.435924	5.29706	6.68101	1.67667e-07	5.3249e-06	6.69077
ENSMUSG00000083097	0.43352	5.17058	6.68038	1.67966e-07	5.3249e-06	6.70479
ENSMUSG00000047434	0.883802	4.09521	6.67773	1.69225e-07	5.3548e-06	6.91372
ENSMUSG00000023020	0.849517	4.06194	6.6768	1.69669e-07	5.35881e-06	6.87386
ENSMUSG00000097723	-1.15815	2.8456	-6.67376	1.71129e-07	5.39487e-06	7.02618
ENSMUSG00000007564	0.563289	7.35711	6.6712	1.72368e-07	5.42381e-06	6.61997
ENSMUSG00000039810	0.74274	5.01602	6.66762	1.74115e-07	5.46863e-06	6.69656
ENSMUSG00000053935	-0.586017	5.44757	-6.66422	1.75791e-07	5.50521e-06	6.63193
ENSMUSG00000064368	-0.979045	9.36007	-6.66394	1.7593e-07	5.50521e-06	6.68435
ENSMUSG00000062006	0.776802	8.06022	6.66222	1.76785e-07	5.50723e-06	6.61441
ENSMUSG00000060938	1.16377	7.80269	6.66198	1.76903e-07	5.50723e-06	6.59182
ENSMUSG00000002524	0.400366	6.88622	6.66185	1.7697e-07	5.50723e-06	6.58423
ENSMUSG00000061759	-0.424678	5.4163	-6.65524	1.80297e-07	5.60046e-06	6.59427
ENSMUSG00000029823	-0.620331	8.3215	-6.64754	1.84254e-07	5.71288e-06	6.59408
ENSMUSG00000020773	1.51515	1.2903	6.6461	1.85004e-07	5.72564e-06	7.16156
ENSMUSG00000020160	1.69152	1.47475	6.6449	1.85633e-07	5.73462e-06	7.13865
ENSMUSG00000084796	-1.48958	2.49053	-6.64171	1.87309e-07	5.77588e-06	6.97479
ENSMUSG00000034912	-1.10505	2.37042	-6.63345	1.91725e-07	5.89533e-06	6.97943
ENSMUSG00000041231	-0.618992	5.73372	-6.63316	1.91879e-07	5.89533e-06	6.52415
ENSMUSG00000014349	0.38663	6.71744	6.63212	1.92442e-07	5.90191e-06	6.49644
ENSMUSG00000067288	0.890951	8.3176	6.63132	1.92881e-07	5.90214e-06	6.53229
ENSMUSG00000032890	-1.05411	3.85773	-6.63083	1.93147e-07	5.90214e-06	6.73189
ENSMUSG00000073405	1.28684	4.12241	6.62956	1.9384e-07	5.91265e-06	6.61401
ENSMUSG00000022450	0.600706	5.24438	6.62697	1.9526e-07	5.94525e-06	6.54561
ENSMUSG00000027611	1.55302	0.672946	6.62363	1.97112e-07	5.9908e-06	7.16512
ENSMUSG00000044646	3.67561	-2.10859	6.62299	1.97464e-07	5.9908e-06	6.89107
ENSMUSG00000033467	0.834073	5.29145	6.61502	2.01959e-07	6.11622e-06	6.54366
ENSMUSG00000040952	0.916083	8.95731	6.60711	2.06519e-07	6.24316e-06	6.48636
ENSMUSG00000009633	1.4927	1.5993	6.60623	2.07033e-07	6.24539e-06	7.07115
ENSMUSG00000028434	1.73011	0.316094	6.60572	2.07331e-07	6.24539e-06	7.12623
ENSMUSG00000009535	-0.539838	5.15873	-6.60121	2.09988e-07	6.31419e-06	6.46521
ENSMUSG00000040441	2.84558	-0.376044	6.59896	2.11324e-07	6.3431e-06	6.99624
ENSMUSG00000024725	0.594923	6.77476	6.59555	2.13373e-07	6.38172e-06	6.39393
ENSMUSG00000030082	0.377746	7.29102	6.595	2.13705e-07	6.38172e-06	6.40204
ENSMUSG00000074661	-1.36426	1.90773	-6.59494	2.13742e-07	6.38172e-06	7.02408
ENSMUSG00000022051	-1.83696	7.93143	-6.59216	2.15422e-07	6.42056e-06	6.45423
ENSMUSG00000091509	-1.03124	2.78194	-6.58724	2.1844e-07	6.49392e-06	6.78818
ENSMUSG00000025776	3.10183	-1.64584	6.5869	2.18651e-07	6.49392e-06	6.88616
ENSMUSG00000034707	0.800659	8.03205	6.58468	2.20027e-07	6.52336e-06	6.39747
ENSMUSG00000027187	-1.29926	7.76391	-6.57567	2.257e-07	6.6697e-06	6.38649
ENSMUSG00000000579	-0.94484	5.00399	-6.57559	2.25751e-07	6.6697e-06	6.41422
ENSMUSG00000062397	0.704197	7.05267	6.57419	2.26641e-07	6.68433e-06	6.33988
ENSMUSG00000097006	0.821774	3.23383	6.57337	2.27167e-07	6.68723e-06	6.70797
ENSMUSG00000031504	1.0174	3.00949	6.57281	2.27529e-07	6.68723e-06	6.77651
ENSMUSG00000096145	0.827112	3.15887	6.56967	2.29557e-07	6.73512e-06	6.71959
ENSMUSG00000098066	-2.24727	-0.733194	-6.56845	2.30347e-07	6.74663e-06	6.90599
ENSMUSG00000005360	-1.5107	2.35104	-6.56616	2.31848e-07	6.77886e-06	6.82794
ENSMUSG00000046519	-0.710485	5.61121	-6.56547	2.32302e-07	6.78042e-06	6.31659
ENSMUSG00000079065	-1.05527	3.58452	-6.56366	2.33489e-07	6.80332e-06	6.60393
ENSMUSG00000078894	-0.728656	3.19779	-6.56285	2.34028e-07	6.80731e-06	6.66589
ENSMUSG00000039081	2.64703	-1.23794	6.55907	2.36539e-07	6.86857e-06	6.94163
ENSMUSG00000001785	0.466495	5.383	6.55751	2.37585e-07	6.88713e-06	6.32036
ENSMUSG00000029071	0.574402	6.18878	6.55445	2.3965e-07	6.93511e-06	6.27776
ENSMUSG00000058153	-3.45868	-1.90239	-6.55219	2.41187e-07	6.95967e-06	6.67373
ENSMUSG00000056216	-0.501386	5.83303	-6.55199	2.41321e-07	6.95967e-06	6.28055
ENSMUSG00000043241	-0.355282	6.26503	-6.54869	2.43588e-07	7.01309e-06	6.25722
ENSMUSG00000024985	-1.34813	2.74304	-6.54554	2.45768e-07	7.06385e-06	6.68257
ENSMUSG00000087424	-1.3841	1.12981	-6.54374	2.47024e-07	7.08714e-06	6.87411
ENSMUSG00000090186	1.11276	5.8146	6.54289	2.47613e-07	7.08714e-06	6.2582
ENSMUSG00000078771	0.763103	5.73548	6.54258	2.47834e-07	7.08714e-06	6.25636
ENSMUSG00000097414	0.600144	3.21586	6.54133	2.48711e-07	7.10022e-06	6.60935
ENSMUSG00000029920	-0.600588	5.10295	-6.53913	2.50263e-07	7.13249e-06	6.29114
ENSMUSG00000001082	0.53716	4.80094	6.53638	2.52216e-07	7.17608e-06	6.34535
ENSMUSG00000024571	0.363341	6.34884	6.5342	2.53777e-07	7.20838e-06	6.21766
ENSMUSG00000016559	0.762458	9.44629	6.5321	2.55288e-07	7.23916e-06	6.31798
ENSMUSG00000047789	-0.755274	5.65005	-6.52661	2.59293e-07	7.32069e-06	6.21537
ENSMUSG00000033475	0.665725	5.52513	6.52658	2.5931e-07	7.32069e-06	6.24678
ENSMUSG00000043061	-0.426757	4.35003	-6.52638	2.59461e-07	7.32069e-06	6.35665
ENSMUSG00000003380	1.00289	6.07586	6.52471	2.60684e-07	7.33136e-06	6.2158
ENSMUSG00000027404	0.671116	6.88791	6.52469	2.60705e-07	7.33136e-06	6.19494
ENSMUSG00000027907	0.870243	6.47175	6.52121	2.6328e-07	7.39149e-06	6.18676
ENSMUSG00000072235	1.0628	6.53648	6.52019	2.64042e-07	7.39867e-06	6.1856
ENSMUSG00000034926	0.654529	4.47328	6.5197	2.6441e-07	7.39867e-06	6.34048
ENSMUSG00000032875	2.94762	-0.88727	6.51723	2.66265e-07	7.43209e-06	6.81148
ENSMUSG00000007892	0.797831	9.35946	6.51636	2.6692e-07	7.43209e-06	6.24151
ENSMUSG00000097180	-0.938036	2.93705	-6.51636	2.66921e-07	7.43209e-06	6.50638
ENSMUSG00000069170	-1.00532	0.991151	-6.50832	2.73069e-07	7.59077e-06	6.81234
ENSMUSG00000030469	-0.897513	2.79166	-6.50574	2.75072e-07	7.63393e-06	6.57605
ENSMUSG00000026073	1.82967	1.61239	6.49791	2.81235e-07	7.79218e-06	6.82184
ENSMUSG00000025937	-0.54119	4.1463	-6.49546	2.83197e-07	7.83373e-06	6.29742
ENSMUSG00000034684	2.51436	0.349919	6.49264	2.85466e-07	7.8836e-06	6.82036
ENSMUSG00000089762	3.01973	0.0659463	6.49143	2.86447e-07	7.89782e-06	6.72559
ENSMUSG00000014361	-1.43415	4.68244	-6.49017	2.87469e-07	7.91068e-06	6.23823
ENSMUSG00000015094	2.03641	-0.531579	6.48971	2.87848e-07	7.91068e-06	6.79987
ENSMUSG00000059142	-1.11822	4.43932	-6.48808	2.89179e-07	7.93438e-06	6.21697
ENSMUSG00000063354	1.35593	2.82502	6.48443	2.92187e-07	8.00393e-06	6.49417
ENSMUSG00000032423	-0.459141	7.52221	-6.47931	2.96452e-07	8.10766e-06	6.08558
ENSMUSG00000027613	0.517068	5.88413	6.47617	2.99103e-07	8.16697e-06	6.06686
ENSMUSG00000025439	0.402943	5.60218	6.47401	3.00939e-07	8.20386e-06	6.07226
ENSMUSG00000008384	0.694344	4.36352	6.46823	3.05912e-07	8.3232e-06	6.22858
ENSMUSG00000027351	-0.659381	4.24274	-6.46779	3.063e-07	8.3232e-06	6.20464
ENSMUSG00000060510	-0.590431	5.51158	-6.46129	3.11994e-07	8.45507e-06	6.03568
ENSMUSG00000043953	1.21693	3.90938	6.46111	3.12152e-07	8.45507e-06	6.14538
ENSMUSG00000041130	0.426169	6.11151	6.45728	3.15558e-07	8.51424e-06	6.00266
ENSMUSG00000028195	4.33059	-2.57409	6.45711	3.15709e-07	8.51424e-06	6.32105
ENSMUSG00000072109	1.14933	6.36566	6.45696	3.15845e-07	8.51424e-06	6.00638
ENSMUSG00000062794	-1.27528	1.38954	-6.4538	3.18692e-07	8.57734e-06	6.64162
ENSMUSG00000007041	0.571373	7.7169	6.45214	3.20194e-07	8.60406e-06	6.0068
ENSMUSG00000028436	-1.42273	7.63975	-6.44574	3.26056e-07	8.7477e-06	6.01546
ENSMUSG00000022711	-0.361056	5.52655	-6.4442	3.27486e-07	8.77217e-06	5.98328
ENSMUSG00000062960	2.18982	2.09085	6.43837	3.32954e-07	8.90453e-06	6.51103
ENSMUSG00000074862	-0.752288	3.8525	-6.43754	3.33733e-07	8.9113e-06	6.1642
ENSMUSG00000020170	-0.554868	5.63645	-6.43634	3.34869e-07	8.92756e-06	5.95453
ENSMUSG00000049649	3.65167	-2.64593	6.42939	3.4154e-07	9.09109e-06	6.19927
ENSMUSG00000020390	-0.756532	6.47011	-6.4283	3.42597e-07	9.10489e-06	5.91841
ENSMUSG00000035954	-1.10586	3.28697	-6.42677	3.44096e-07	9.13041e-06	6.25954
ENSMUSG00000072763	-0.995181	3.62765	-6.42567	3.45163e-07	9.1444e-06	6.21081
ENSMUSG00000044156	1.44284	4.82876	6.4205	3.50271e-07	9.26523e-06	5.96345
ENSMUSG00000024404	-0.890576	7.18589	-6.41911	3.51651e-07	9.27532e-06	5.91379
ENSMUSG00000041378	4.11208	-0.118849	6.41902	3.51749e-07	9.27532e-06	6.57611
ENSMUSG00000078087	0.573644	8.83031	6.41807	3.52692e-07	9.28574e-06	5.95223
ENSMUSG00000021327	-0.516261	6.18626	-6.41543	3.55344e-07	9.34101e-06	5.87885
ENSMUSG00000028483	-0.873841	4.52815	-6.41467	3.56115e-07	9.3437e-06	6.02217
ENSMUSG00000021120	-0.705034	3.49167	-6.41424	3.5655e-07	9.3437e-06	6.19694
ENSMUSG00000020865	-1.29663	5.02604	-6.41288	3.57933e-07	9.36545e-06	5.9464
ENSMUSG00000037434	-0.713128	4.83802	-6.40812	3.62802e-07	9.47821e-06	5.94061
ENSMUSG00000035295	-1.6467	0.146185	-6.40708	3.63878e-07	9.49168e-06	6.58743
ENSMUSG00000034845	2.28355	2.42562	6.40505	3.65981e-07	9.53183e-06	6.34335
ENSMUSG00000070003	0.601376	5.04272	6.40353	3.67559e-07	9.55823e-06	5.95866
ENSMUSG00000071552	1.93513	2.71775	6.39856	3.72784e-07	9.67042e-06	6.42885
ENSMUSG00000020362	-0.471588	7.30489	-6.39834	3.73016e-07	9.67042e-06	5.84928
ENSMUSG00000025967	0.514173	8.69746	6.39269	3.79057e-07	9.81201e-06	5.87162
ENSMUSG00000090626	-0.933842	4.25355	-6.39133	3.80517e-07	9.83476e-06	5.94175
ENSMUSG00000026761	-0.639645	4.88344	-6.3881	3.84029e-07	9.9104e-06	5.89403
ENSMUSG00000035726	-0.774069	7.49613	-6.38425	3.88254e-07	9.98486e-06	5.81859
ENSMUSG00000018102	-1.54151	4.14308	-6.38407	3.88455e-07	9.98486e-06	5.88372
ENSMUSG00000042444	-0.531346	7.00453	-6.38385	3.88692e-07	9.98486e-06	5.7994
ENSMUSG00000026580	3.22126	0.860009	6.38333	3.89273e-07	9.98486e-06	6.52263
ENSMUSG00000027673	0.480682	5.14669	6.38243	3.90266e-07	9.99519e-06	5.86898
ENSMUSG00000053510	-0.372091	7.68528	-6.37924	3.93824e-07	1.00711e-05	5.80648
ENSMUSG00000097354	-0.844339	4.33791	-6.37491	3.98692e-07	1.01802e-05	5.85866
ENSMUSG00000045377	3.22328	-1.43983	6.3743	3.9939e-07	1.01826e-05	6.1845
ENSMUSG00000023048	0.57311	6.62699	6.37271	4.012e-07	1.02134e-05	5.75915
ENSMUSG00000021824	-0.434928	6.18197	-6.37098	4.03173e-07	1.02482e-05	5.75107
ENSMUSG00000030934	0.397927	6.50689	6.369	4.05453e-07	1.02907e-05	5.74689
ENSMUSG00000031880	1.23298	3.75371	6.36338	4.11978e-07	1.04407e-05	6.07516
ENSMUSG00000024940	2.12722	0.499263	6.35978	4.16221e-07	1.05324e-05	6.42794
ENSMUSG00000040325	-0.340272	6.79485	-6.35914	4.16973e-07	1.05357e-05	5.72285
ENSMUSG00000014592	-0.658995	3.34667	-6.35766	4.18737e-07	1.05645e-05	6.03936
ENSMUSG00000060935	-0.509595	4.10512	-6.35394	4.2319e-07	1.0661e-05	5.91668
ENSMUSG00000003762	0.932462	4.14085	6.35224	4.25244e-07	1.06859e-05	5.91026
ENSMUSG00000024308	0.537086	8.29548	6.35205	4.25464e-07	1.06859e-05	5.73987
ENSMUSG00000022126	4.54437	0.299956	6.35155	4.26072e-07	1.06859e-05	6.30352
ENSMUSG00000017485	-0.670429	8.09516	-6.35099	4.26756e-07	1.06872e-05	5.73171
ENSMUSG00000040229	-1.24528	2.53531	-6.35001	4.27943e-07	1.07011e-05	6.18059
ENSMUSG00000056612	0.639788	4.80691	6.34771	4.30758e-07	1.07389e-05	5.79637
ENSMUSG00000033287	1.48255	1.3953	6.34723	4.31348e-07	1.07389e-05	6.38673
ENSMUSG00000023781	-1.95035	0.0934981	-6.34722	4.31356e-07	1.07389e-05	6.42499
ENSMUSG00000000320	1.46763	3.19062	6.34539	4.33604e-07	1.0779e-05	6.10972
ENSMUSG00000033763	1.54581	1.43638	6.34421	4.35063e-07	1.07994e-05	6.27606
ENSMUSG00000027708	-0.928552	6.03979	-6.34091	4.3916e-07	1.08851e-05	5.6698
ENSMUSG00000030403	0.591223	8.15461	6.32964	4.5348e-07	1.12236e-05	5.66955
ENSMUSG00000044501	-1.15202	3.90094	-6.32869	4.54706e-07	1.12375e-05	5.91415
ENSMUSG00000035596	0.670887	6.08537	6.32306	4.62052e-07	1.14024e-05	5.62849
ENSMUSG00000029135	1.40895	4.83088	6.31711	4.69933e-07	1.158e-05	5.75223
ENSMUSG00000020564	-0.476052	6.12	-6.31371	4.74505e-07	1.16604e-05	5.58879
ENSMUSG00000028211	-0.790905	7.68492	-6.31367	4.74569e-07	1.16604e-05	5.61449
ENSMUSG00000004951	3.17517	-0.0212867	6.3131	4.75334e-07	1.16622e-05	6.33321
ENSMUSG00000098905	-0.871009	3.6258	-6.3105	4.7887e-07	1.1732e-05	5.9042
ENSMUSG00000034910	-2.70096	-1.86123	-6.30788	4.82447e-07	1.18025e-05	6.08337
ENSMUSG00000031997	2.13796	-1.92419	6.30478	4.86732e-07	1.18902e-05	6.28279
ENSMUSG00000075042	-1.3353	2.01734	-6.30329	4.88794e-07	1.19233e-05	6.05802
ENSMUSG00000034009	-1.58233	0.301243	-6.29957	4.94003e-07	1.20331e-05	6.28762
ENSMUSG00000051147	-0.704928	3.95856	-6.29891	4.94928e-07	1.20383e-05	5.74046
ENSMUSG00000098206	-2.84131	-1.71496	-6.29633	4.98583e-07	1.21098e-05	6.2259
ENSMUSG00000090222	-1.11207	1.27617	-6.29421	5.01606e-07	1.21532e-05	6.01327
ENSMUSG00000027712	0.627449	5.96313	6.29407	5.01806e-07	1.21532e-05	5.54709
ENSMUSG00000021112	-0.736277	4.6478	-6.29304	5.0328e-07	1.21715e-05	5.64313
ENSMUSG00000027843	0.875998	7.05653	6.2903	5.07221e-07	1.22493e-05	5.533
ENSMUSG00000066798	-0.608085	5.00249	-6.28618	5.132e-07	1.23623e-05	5.58974
ENSMUSG00000051616	-1.85533	0.159032	-6.28607	5.1336e-07	1.23623e-05	6.25257
ENSMUSG00000047213	-0.603811	6.66025	-6.28048	5.21608e-07	1.2543e-05	5.49459
ENSMUSG00000020268	-0.663407	2.45908	-6.2786	5.24406e-07	1.2588e-05	5.82466
ENSMUSG00000085213	-1.35833	0.441436	-6.2779	5.25455e-07	1.2588e-05	6.23326
ENSMUSG00000027642	0.391638	7.39925	6.27773	5.2571e-07	1.2588e-05	5.50265
ENSMUSG00000070031	0.824195	7.31358	6.27562	5.28888e-07	1.26463e-05	5.49791
ENSMUSG00000060044	-0.884785	4.22681	-6.27507	5.29713e-07	1.26481e-05	5.68932
ENSMUSG00000032604	0.286098	6.90697	6.27357	5.31979e-07	1.26843e-05	5.47732
ENSMUSG00000025505	-0.550857	4.45216	-6.27206	5.34279e-07	1.27212e-05	5.62979
ENSMUSG00000024472	-0.608409	6.19345	-6.26309	5.48114e-07	1.30323e-05	5.44631
ENSMUSG00000021500	-0.358593	7.61563	-6.24857	5.7127e-07	1.35639e-05	5.42701
ENSMUSG00000027684	3.2234	-0.962886	6.24375	5.79186e-07	1.37028e-05	6.14466
ENSMUSG00000023019	-1.21142	2.32378	-6.24352	5.7955e-07	1.37028e-05	5.89279
ENSMUSG00000024074	0.993179	4.74547	6.24287	5.8064e-07	1.37028e-05	5.49741
ENSMUSG00000042747	0.694053	5.18968	6.24269	5.80926e-07	1.37028e-05	5.47032
ENSMUSG00000062373	-0.676397	4.74495	-6.24255	5.81171e-07	1.37028e-05	5.47793
ENSMUSG00000029299	-0.710398	5.60678	-6.23955	5.86151e-07	1.3801e-05	5.42226
ENSMUSG00000059974	-2.77758	-0.922807	-6.23338	5.96564e-07	1.40267e-05	6.09284
ENSMUSG00000027134	0.877794	4.56648	6.23074	6.01078e-07	1.41133e-05	5.52038
ENSMUSG00000038332	-0.515921	6.63659	-6.22908	6.03927e-07	1.41605e-05	5.34775
ENSMUSG00000092260	-1.12445	2.30522	-6.22847	6.04984e-07	1.41657e-05	5.90842
ENSMUSG00000033538	0.679065	4.37261	6.22485	6.11262e-07	1.42929e-05	5.52119
ENSMUSG00000030269	0.48946	5.58097	6.22141	6.17289e-07	1.44139e-05	5.35602
ENSMUSG00000021400	0.535376	5.53297	6.21994	6.19875e-07	1.44544e-05	5.36368
ENSMUSG00000046470	2.54696	-1.09295	6.21806	6.23219e-07	1.45123e-05	6.06028
ENSMUSG00000016984	-0.707061	4.26689	-6.21488	6.28887e-07	1.46242e-05	5.502
ENSMUSG00000040412	2.77252	-0.217053	6.20732	6.42608e-07	1.49228e-05	6.046
ENSMUSG00000030591	0.414252	6.52401	6.20249	6.51534e-07	1.51093e-05	5.27095
ENSMUSG00000046541	-0.888244	4.64814	-6.20005	6.56093e-07	1.51943e-05	5.36442
ENSMUSG00000037805	0.894349	7.87325	6.19548	6.64703e-07	1.53726e-05	5.27794
ENSMUSG00000024335	0.548482	8.52756	6.19291	6.69596e-07	1.54647e-05	5.29314
ENSMUSG00000054945	-1.91786	0.128728	-6.18849	6.78094e-07	1.56396e-05	5.98798
ENSMUSG00000038718	0.888574	3.91397	6.18768	6.79675e-07	1.56547e-05	5.34674
ENSMUSG00000005846	0.274297	6.38634	6.18709	6.80819e-07	1.56598e-05	5.22559
ENSMUSG00000002111	0.803745	6.51613	6.18607	6.82802e-07	1.56841e-05	5.22831
ENSMUSG00000021294	-1.33844	-0.358496	-6.18342	6.8798e-07	1.57816e-05	5.80068
ENSMUSG00000024870	0.460613	6.48588	6.18151	6.91757e-07	1.58219e-05	5.21084
ENSMUSG00000036928	-1.45019	0.961951	-6.18137	6.92034e-07	1.58219e-05	5.83193
ENSMUSG00000047407	1.04303	5.37067	6.18111	6.9254e-07	1.58219e-05	5.28339
ENSMUSG00000002015	0.547893	6.3685	6.17843	6.97861e-07	1.5922e-05	5.20345
ENSMUSG00000024424	1.03314	1.84387	6.17694	7.00843e-07	1.59685e-05	5.85594
ENSMUSG00000028191	0.638624	6.32899	6.17551	7.03704e-07	1.60121e-05	5.19733
ENSMUSG00000030681	0.590978	5.77255	6.17388	7.06992e-07	1.60653e-05	5.21342
ENSMUSG00000045817	1.5561	8.97023	6.17115	7.12535e-07	1.61696e-05	5.24301
ENSMUSG00000006589	0.695653	4.70556	6.17037	7.14125e-07	1.6184e-05	5.33283
ENSMUSG00000027456	1.68482	1.2278	6.16941	7.16069e-07	1.62063e-05	5.922
ENSMUSG00000024392	0.312311	7.71498	6.16611	7.22856e-07	1.63381e-05	5.19629
ENSMUSG00000097320	-1.10517	1.96528	-6.15877	7.38181e-07	1.66432e-05	5.70065
ENSMUSG00000023272	0.827997	5.45098	6.1587	7.38323e-07	1.66432e-05	5.17863
ENSMUSG00000037062	-0.792833	7.56003	-6.15701	7.41899e-07	1.67016e-05	5.1799
ENSMUSG00000032621	-0.422219	5.81687	-6.15463	7.4696e-07	1.67932e-05	5.1383
ENSMUSG00000095687	1.8582	5.45412	6.15331	7.49789e-07	1.68345e-05	5.24282
ENSMUSG00000027931	3.65965	-1.09035	6.15065	7.55503e-07	1.69403e-05	5.73254
ENSMUSG00000071847	2.62025	-1.82369	6.14458	7.68729e-07	1.7214e-05	5.67832
ENSMUSG00000075569	-1.20699	0.451849	-6.14286	7.72509e-07	1.72758e-05	5.84735
ENSMUSG00000017754	1.28023	4.91705	6.13989	7.79112e-07	1.74005e-05	5.19251
ENSMUSG00000030595	0.68813	5.01423	6.13548	7.88995e-07	1.7598e-05	5.1886
ENSMUSG00000078903	-1.23103	3.93564	-6.13369	7.93033e-07	1.76648e-05	5.33168
ENSMUSG00000056758	1.01423	0.511949	6.12666	8.09127e-07	1.79996e-05	5.71362
ENSMUSG00000026712	-1.3045	6.41518	-6.12478	8.13498e-07	1.8049e-05	5.05615
ENSMUSG00000015709	1.76924	1.18775	6.12456	8.14007e-07	1.8049e-05	5.80197
ENSMUSG00000086841	0.702999	4.92793	6.12433	8.14544e-07	1.8049e-05	5.16731
ENSMUSG00000001576	0.545493	5.46072	6.11997	8.24763e-07	1.82515e-05	5.07474
ENSMUSG00000091264	-0.538281	4.03434	-6.11853	8.28168e-07	1.8303e-05	5.23858
ENSMUSG00000053347	-0.942753	4.54753	-6.11566	8.34992e-07	1.84297e-05	5.19551
ENSMUSG00000031871	1.97046	1.9274	6.11402	8.38923e-07	1.84924e-05	5.64954
ENSMUSG00000035448	-1.57845	4.9513	-6.11297	8.41447e-07	1.85239e-05	5.09833
ENSMUSG00000024780	-0.644844	4.67107	-6.10976	8.49201e-07	1.86703e-05	5.13135
ENSMUSG00000026333	-0.834177	3.04132	-6.10703	8.55853e-07	1.87774e-05	5.37264
ENSMUSG00000034035	-0.763215	2.56416	-6.10685	8.56293e-07	1.87774e-05	5.51507
ENSMUSG00000056537	-0.737866	6.4155	-6.10598	8.58432e-07	1.87777e-05	4.99733
ENSMUSG00000024991	-0.501036	8.86686	-6.10561	8.59345e-07	1.87777e-05	5.06595
ENSMUSG00000079492	1.37571	0.974627	6.10549	8.5963e-07	1.87777e-05	5.17673
ENSMUSG00000001767	-0.36839	5.62285	-6.10249	8.67039e-07	1.89151e-05	5.00352
ENSMUSG00000015312	0.832999	4.16158	6.10043	8.72161e-07	1.90023e-05	5.25263
ENSMUSG00000044533	0.473647	10.0199	6.09586	8.83658e-07	1.9218e-05	5.06644
ENSMUSG00000063049	0.627949	3.88365	6.09559	8.84331e-07	1.9218e-05	5.24285
ENSMUSG00000009927	0.652047	8.04155	6.09514	8.85468e-07	1.92181e-05	4.99925
ENSMUSG00000032420	1.68142	4.56282	6.09272	8.91624e-07	1.93269e-05	5.27301
ENSMUSG00000070282	-0.991364	1.78236	-6.09017	8.98148e-07	1.94434e-05	5.57898
ENSMUSG00000044021	-1.65103	1.09193	-6.08848	9.02522e-07	1.95131e-05	5.66835
ENSMUSG00000019782	0.434754	4.97893	6.08441	9.13072e-07	1.97112e-05	5.03207
ENSMUSG00000097119	-0.972407	3.87355	-6.08372	9.14887e-07	1.97112e-05	5.14785
ENSMUSG00000032293	-0.49421	6.59613	-6.08361	9.15174e-07	1.97112e-05	4.93054
ENSMUSG00000042903	-0.827513	5.90073	-6.08135	9.21124e-07	1.98141e-05	4.9277
ENSMUSG00000086725	-0.979715	2.34819	-6.07987	9.25016e-07	1.98498e-05	5.45962
ENSMUSG00000089719	-1.06004	1.8819	-6.07983	9.25129e-07	1.98498e-05	5.54233
ENSMUSG00000093682	-2.53857	-2.00383	-6.07931	9.26516e-07	1.98544e-05	5.61003
ENSMUSG00000025544	-0.36139	6.90358	-6.07685	9.3306e-07	1.99511e-05	4.91405
ENSMUSG00000079011	-0.806899	2.03531	-6.07665	9.33601e-07	1.99511e-05	5.45539
ENSMUSG00000036478	1.04294	9.40972	6.07608	9.35103e-07	1.99511e-05	4.98733
ENSMUSG00000074357	-2.18266	-0.794021	-6.07585	9.35741e-07	1.99511e-05	5.66414
ENSMUSG00000086247	-1.05119	0.73021	-6.07413	9.4034e-07	2.00097e-05	5.63736
ENSMUSG00000022744	0.571726	5.18849	6.07394	9.40855e-07	2.00097e-05	4.96703
ENSMUSG00000021796	1.82074	1.94639	6.06986	9.51913e-07	2.02088e-05	5.58494
ENSMUSG00000043079	2.0079	1.91865	6.06929	9.53465e-07	2.02088e-05	5.55295
ENSMUSG00000035840	-0.659741	4.74615	-6.06917	9.53796e-07	2.02088e-05	4.98914
ENSMUSG00000026509	0.736825	6.08939	6.06724	9.59079e-07	2.02953e-05	4.88998
ENSMUSG00000035735	1.68148	-0.0191046	6.06466	9.66186e-07	2.04202e-05	5.62168
ENSMUSG00000026640	-0.754962	2.71228	-6.06324	9.70119e-07	2.04599e-05	5.31222
ENSMUSG00000000346	0.394043	8.66325	6.06311	9.70484e-07	2.04599e-05	4.93243
ENSMUSG00000027168	-1.75572	0.820214	-6.06079	9.76963e-07	2.05709e-05	5.5899
ENSMUSG00000041453	0.638034	8.89043	6.05687	9.87975e-07	2.07769e-05	4.88618
ENSMUSG00000020522	-0.517881	5.78781	-6.05575	9.91148e-07	2.08178e-05	4.86729
ENSMUSG00000032548	1.99977	1.08995	6.05218	1.00136e-06	2.10061e-05	5.55772
ENSMUSG00000054568	-1.38706	0.227029	-6.05017	1.00714e-06	2.11013e-05	5.61067
ENSMUSG00000026819	0.458234	4.69475	6.04311	1.02771e-06	2.15056e-05	4.94901
ENSMUSG00000029267	-0.448273	5.67954	-6.04139	1.03278e-06	2.15851e-05	4.82572
ENSMUSG00000087485	3.29332	-1.99148	6.03859	1.04108e-06	2.17318e-05	5.3617
ENSMUSG00000020189	-0.798667	7.09024	-6.03174	1.06171e-06	2.2135e-05	4.79534
ENSMUSG00000002602	-1.15719	6.97378	-6.03097	1.06405e-06	2.21566e-05	4.78861
ENSMUSG00000049516	0.565838	6.3717	6.03055	1.06536e-06	2.21566e-05	4.77883
ENSMUSG00000031390	-1.34843	2.85301	-6.02934	1.06903e-06	2.22057e-05	5.2547
ENSMUSG00000006519	0.715769	7.14638	6.02692	1.07648e-06	2.2311e-05	4.77585
ENSMUSG00000073411	0.848911	10.9345	6.02662	1.07741e-06	2.2311e-05	4.91779
ENSMUSG00000039084	-1.99956	0.604333	-6.02641	1.07806e-06	2.2311e-05	5.54434
ENSMUSG00000039357	-0.517632	4.32973	-6.02493	1.08263e-06	2.23783e-05	4.94968
ENSMUSG00000054135	-2.03943	0.459467	-6.02437	1.08439e-06	2.23874e-05	5.48105
ENSMUSG00000039316	0.867286	7.13726	6.02297	1.08875e-06	2.245e-05	4.77327
ENSMUSG00000061904	0.40653	8.48168	6.02193	1.09197e-06	2.24891e-05	4.80448
ENSMUSG00000062647	0.310637	9.65086	6.02145	1.0935e-06	2.24932e-05	4.84954
ENSMUSG00000073771	0.679011	4.30809	6.01884	1.10171e-06	2.26345e-05	4.94192
ENSMUSG00000028860	0.970507	2.7699	6.01805	1.1042e-06	2.26581e-05	5.20205
ENSMUSG00000057863	0.843724	7.55436	6.01422	1.11638e-06	2.28289e-05	4.75112
ENSMUSG00000053693	-0.921075	2.53668	-6.01406	1.11689e-06	2.28289e-05	5.2267
ENSMUSG00000001323	-0.646594	3.62369	-6.01375	1.11788e-06	2.28289e-05	5.01176
ENSMUSG00000040651	-0.763237	6.44147	-6.01337	1.11911e-06	2.28289e-05	4.7295
ENSMUSG00000074733	-0.77262	5.13931	-6.01332	1.11926e-06	2.28289e-05	4.79927
ENSMUSG00000085445	-1.28955	0.986182	-6.00916	1.13268e-06	2.30747e-05	5.44505
ENSMUSG00000048076	0.321591	7.87095	6.00382	1.15015e-06	2.34024e-05	4.72989
ENSMUSG00000024446	0.657003	3.97413	5.99843	1.16809e-06	2.37282e-05	4.92521
ENSMUSG00000023262	0.696396	3.12185	5.99817	1.16896e-06	2.37282e-05	5.07103
ENSMUSG00000039233	-0.411348	5.29483	-5.99253	1.18798e-06	2.40695e-05	4.71275
ENSMUSG00000059923	0.603123	8.07278	5.99235	1.18862e-06	2.40695e-05	4.70165
ENSMUSG00000020003	0.468162	4.08866	5.98959	1.19805e-06	2.42314e-05	4.89211
ENSMUSG00000044477	0.467158	5.91924	5.98799	1.20357e-06	2.43142e-05	4.66855
ENSMUSG00000027200	-1.16365	4.43762	-5.98719	1.20632e-06	2.43407e-05	4.83543
ENSMUSG00000033350	1.26046	2.41585	5.98298	1.22098e-06	2.46071e-05	5.19272
ENSMUSG00000030380	-1.10384	1.17938	-5.9816	1.22581e-06	2.46752e-05	5.31283
ENSMUSG00000060548	2.65139	2.72418	5.98014	1.23097e-06	2.47496e-05	5.01186
ENSMUSG00000090862	0.753519	8.88709	5.97883	1.23559e-06	2.4813e-05	4.69052
ENSMUSG00000032468	-0.370246	5.42842	-5.9756	1.24709e-06	2.50143e-05	4.65893
ENSMUSG00000022174	0.455883	5.97694	5.97218	1.25938e-06	2.52071e-05	4.62642
ENSMUSG00000024772	0.487657	7.3194	5.97185	1.26057e-06	2.52071e-05	4.63434
ENSMUSG00000028618	0.373871	6.7991	5.97169	1.26118e-06	2.52071e-05	4.61168
ENSMUSG00000064356	-1.62646	6.36056	-5.96966	1.26854e-06	2.53245e-05	4.61572
ENSMUSG00000027984	0.50617	4.74366	5.96916	1.27035e-06	2.53307e-05	4.74276
ENSMUSG00000064127	-0.535088	6.04802	-5.96399	1.28932e-06	2.56489e-05	4.58842
ENSMUSG00000027358	2.52719	0.497395	5.96399	1.28934e-06	2.56489e-05	5.37202
ENSMUSG00000037905	0.514728	5.98184	5.95914	1.30739e-06	2.59499e-05	4.57816
ENSMUSG00000059070	0.593323	9.07348	5.9591	1.30753e-06	2.59499e-05	4.64163
ENSMUSG00000021127	1.03927	8.69822	5.95799	1.31173e-06	2.59714e-05	4.62075
ENSMUSG00000021807	0.437363	5.59635	5.95789	1.31208e-06	2.59714e-05	4.62762
ENSMUSG00000026849	0.440715	4.65647	5.95731	1.31427e-06	2.59714e-05	4.71273
ENSMUSG00000047675	0.486777	9.85935	5.95718	1.31476e-06	2.59714e-05	4.672
ENSMUSG00000010608	-0.496436	8.33201	-5.95475	1.32395e-06	2.61225e-05	4.61175
ENSMUSG00000050088	-0.577725	4.64454	-5.95251	1.3325e-06	2.62606e-05	4.68151
ENSMUSG00000036282	-0.629418	5.15424	-5.95047	1.3403e-06	2.63837e-05	4.61887
ENSMUSG00000008429	0.399288	5.59987	5.94916	1.34539e-06	2.6453e-05	4.57771
ENSMUSG00000062312	-1.53285	1.1188	-5.94519	1.36079e-06	2.67248e-05	5.21253
ENSMUSG00000035042	1.31575	6.33112	5.94306	1.36914e-06	2.68576e-05	4.56094
ENSMUSG00000031059	0.527282	5.76312	5.94265	1.37075e-06	2.68582e-05	4.5447
ENSMUSG00000097142	1.49375	5.09051	5.94186	1.37387e-06	2.68713e-05	4.68619
ENSMUSG00000057506	0.667466	4.89262	5.94167	1.3746e-06	2.68713e-05	4.64316
ENSMUSG00000040537	-1.02003	2.60446	-5.93911	1.38475e-06	2.70386e-05	4.9679
ENSMUSG00000020225	0.464781	4.64257	5.93582	1.39786e-06	2.72432e-05	4.64758
ENSMUSG00000011960	-0.373597	6.82963	-5.93568	1.39845e-06	2.72432e-05	4.50836
ENSMUSG00000029616	0.536936	7.01373	5.93479	1.40201e-06	2.7271e-05	4.5101
ENSMUSG00000097718	-1.33299	0.646695	-5.93452	1.4031e-06	2.7271e-05	5.27524
ENSMUSG00000022490	2.55891	-2.41294	5.93151	1.41529e-06	2.74559e-05	4.90924
ENSMUSG00000035517	0.477942	4.72805	5.93127	1.41626e-06	2.74559e-05	4.62078
ENSMUSG00000003072	0.569374	6.72098	5.93057	1.41908e-06	2.74559e-05	4.49253
ENSMUSG00000055200	-1.07978	3.89334	-5.93057	1.4191e-06	2.74559e-05	4.71091
ENSMUSG00000097327	-1.05497	2.78952	-5.92807	1.42932e-06	2.76112e-05	4.90074
ENSMUSG00000005881	0.410828	5.74281	5.92781	1.43039e-06	2.76112e-05	4.50264
ENSMUSG00000035898	-0.707219	4.85456	-5.9272	1.4329e-06	2.76281e-05	4.58094
ENSMUSG00000097479	1.4287	2.40665	5.92533	1.44059e-06	2.77388e-05	5.04439
ENSMUSG00000050335	1.05954	5.73211	5.92501	1.44191e-06	2.77388e-05	4.51042
ENSMUSG00000025369	-0.309073	7.73711	-5.92454	1.44389e-06	2.77454e-05	4.50448
ENSMUSG00000091176	-2.44547	-1.72535	-5.92118	1.45785e-06	2.79818e-05	5.01544
ENSMUSG00000076666	3.77068	4.41314	5.92025	1.46176e-06	2.80251e-05	4.72521
ENSMUSG00000087574	-0.794745	1.05151	-5.91979	1.46371e-06	2.80307e-05	5.07359
ENSMUSG00000040097	0.5421	4.21072	5.91789	1.47168e-06	2.81516e-05	4.67238
ENSMUSG00000019139	0.428225	5.56643	5.91627	1.47858e-06	2.82515e-05	4.48907
ENSMUSG00000062825	0.661452	10.7631	5.91527	1.48281e-06	2.82808e-05	4.58568
ENSMUSG00000040711	1.02942	2.14308	5.91512	1.48345e-06	2.82808e-05	5.06453
ENSMUSG00000028692	0.417055	7.57078	5.91406	1.48797e-06	2.83351e-05	4.4647
ENSMUSG00000043716	0.426912	10.0616	5.90907	1.50947e-06	2.87121e-05	4.54577
ENSMUSG00000042742	-0.770601	4.79072	-5.90816	1.51338e-06	2.87542e-05	4.52837
ENSMUSG00000034993	0.557672	5.51338	5.90669	1.5198e-06	2.88438e-05	4.45121
ENSMUSG00000054115	-1.19433	3.49003	-5.90525	1.52609e-06	2.89286e-05	4.6887
ENSMUSG00000056167	0.333063	5.68062	5.90489	1.52769e-06	2.89286e-05	4.4338
ENSMUSG00000031134	-0.605079	5.97629	-5.90378	1.53254e-06	2.89882e-05	4.41903
ENSMUSG00000036180	0.292213	6.84674	5.90203	1.54029e-06	2.91023e-05	4.411
ENSMUSG00000033066	0.626295	5.26624	5.89947	1.55164e-06	2.92839e-05	4.43614
ENSMUSG00000029624	0.390008	4.72175	5.89896	1.55394e-06	2.92946e-05	4.53361
ENSMUSG00000038733	-1.11881	9.02979	-5.89253	1.58289e-06	2.98072e-05	4.48289
ENSMUSG00000028712	-2.67201	-1.86984	-5.8911	1.5894e-06	2.98966e-05	5.02148
ENSMUSG00000073775	0.485778	4.79395	5.89011	1.5939e-06	2.9948e-05	4.49859
ENSMUSG00000032562	0.371832	9.25977	5.88761	1.60539e-06	3.01304e-05	4.44772
ENSMUSG00000076674	-1.49677	2.87708	-5.88484	1.61823e-06	3.03378e-05	4.63785
ENSMUSG00000008140	0.461438	6.29684	5.8834	1.62493e-06	3.04297e-05	4.35573
ENSMUSG00000025899	-0.794179	4.79562	-5.88235	1.62987e-06	3.04764e-05	4.42929
ENSMUSG00000025269	-0.731258	3.87105	-5.88186	1.63216e-06	3.04764e-05	4.57109
ENSMUSG00000016554	0.333431	7.17821	5.88164	1.6332e-06	3.04764e-05	4.36274
ENSMUSG00000055991	-0.621671	3.38629	-5.88133	1.63462e-06	3.04764e-05	4.6815
ENSMUSG00000015437	0.973235	3.26389	5.87957	1.6429e-06	3.0597e-05	4.70473
ENSMUSG00000047747	-0.936208	2.27867	-5.87704	1.65491e-06	3.07843e-05	4.91614
ENSMUSG00000062300	1.51031	0.62039	5.87668	1.6566e-06	3.07843e-05	5.06049
ENSMUSG00000004980	-0.535341	9.90111	-5.87384	1.6702e-06	3.09807e-05	4.44869
ENSMUSG00000033272	0.277337	6.22298	5.87371	1.67082e-06	3.09807e-05	4.32738
ENSMUSG00000071715	0.715551	6.73381	5.87011	1.68816e-06	3.12679e-05	4.32071
ENSMUSG00000031068	0.39622	5.49531	5.8657	1.70973e-06	3.16328e-05	4.33963
ENSMUSG00000029605	-0.840384	3.68997	-5.86344	1.72084e-06	3.18037e-05	4.60757
ENSMUSG00000078348	0.572364	4.71911	5.8628	1.72401e-06	3.18274e-05	4.45331
ENSMUSG00000029569	-0.579842	5.88369	-5.86201	1.72793e-06	3.1865e-05	4.30313
ENSMUSG00000006463	-0.730662	3.87612	-5.86099	1.73299e-06	3.19237e-05	4.49725
ENSMUSG00000046814	2.5024	-1.15771	5.85704	1.7528e-06	3.2219e-05	5.04864
ENSMUSG00000019806	0.668114	3.25139	5.85703	1.75283e-06	3.2219e-05	4.70561
ENSMUSG00000024425	0.51774	6.2904	5.85254	1.77562e-06	3.26025e-05	4.2694
ENSMUSG00000002985	1.02549	8.26128	5.85093	1.78383e-06	3.27177e-05	4.30591
ENSMUSG00000017418	-0.909836	4.35739	-5.84939	1.79177e-06	3.28279e-05	4.4434
ENSMUSG00000035992	-0.678341	5.42127	-5.84786	1.79968e-06	3.2937e-05	4.28997
ENSMUSG00000067274	0.447199	10.2266	5.8456	1.81138e-06	3.31155e-05	4.34607
ENSMUSG00000067344	0.570396	7.50311	5.84344	1.82268e-06	3.3286e-05	4.25925
ENSMUSG00000085156	0.816332	3.2433	5.83712	1.85611e-06	3.386e-05	4.62939
ENSMUSG00000034118	0.398029	5.14738	5.83604	1.86184e-06	3.38796e-05	4.2831
ENSMUSG00000015869	0.58329	5.57395	5.83545	1.86503e-06	3.38796e-05	4.25784
ENSMUSG00000033565	1.83136	-0.57484	5.8352	1.86633e-06	3.38796e-05	5.02873
ENSMUSG00000022463	0.801084	8.15607	5.83514	1.86669e-06	3.38796e-05	4.25088
ENSMUSG00000009291	0.372679	6.16093	5.83504	1.86719e-06	3.38796e-05	4.21739
ENSMUSG00000022607	0.670712	3.98364	5.83397	1.87296e-06	3.39478e-05	4.45821
ENSMUSG00000028246	3.6796	-1.75224	5.83267	1.87996e-06	3.40384e-05	4.80731
ENSMUSG00000040525	2.82512	-0.382261	5.83088	1.8897e-06	3.41781e-05	5.01856
ENSMUSG00000055704	-1.20673	2.14228	-5.82966	1.8963e-06	3.4261e-05	4.8169
ENSMUSG00000032845	1.08908	3.81685	5.82767	1.9072e-06	3.44211e-05	4.55067
ENSMUSG00000083165	-3.58324	-3.30502	-5.82653	1.91347e-06	3.44975e-05	4.61274
ENSMUSG00000079641	0.729169	7.92349	5.82319	1.93192e-06	3.47931e-05	4.21096
ENSMUSG00000023868	2.11425	-0.564408	5.81979	1.95092e-06	3.50979e-05	4.99237
ENSMUSG00000035067	1.89382	0.240963	5.81546	1.97535e-06	3.54775e-05	4.98098
ENSMUSG00000020228	-0.415429	5.72636	-5.81531	1.97621e-06	3.54775e-05	4.16676
ENSMUSG00000027253	-1.16702	2.11104	-5.81276	1.99075e-06	3.57007e-05	4.71848
ENSMUSG00000024077	-0.381119	6.0405	-5.81077	2.00215e-06	3.58297e-05	4.14789
ENSMUSG00000071203	0.740215	4.83766	5.81077	2.00218e-06	3.58297e-05	4.31431
ENSMUSG00000072692	1.04678	6.39361	5.80874	2.01391e-06	3.60016e-05	4.15219
ENSMUSG00000037405	0.872102	6.12509	5.80762	2.02039e-06	3.60793e-05	4.15497
ENSMUSG00000016496	0.797048	6.24171	5.80716	2.02306e-06	3.6089e-05	4.13947
ENSMUSG00000028234	0.835224	8.85147	5.79562	2.09133e-06	3.72022e-05	4.15912
ENSMUSG00000022372	0.817504	7.77783	5.79557	2.09165e-06	3.72022e-05	4.12766
ENSMUSG00000044072	1.37778	2.46246	5.7955	2.09206e-06	3.72022e-05	4.66128
ENSMUSG00000032387	2.31366	-0.137434	5.79142	2.11679e-06	3.76025e-05	4.91458
ENSMUSG00000030256	1.38509	5.14349	5.7894	2.1291e-06	3.77815e-05	4.12398
ENSMUSG00000006333	0.500575	10.1694	5.78852	2.13449e-06	3.78374e-05	4.20079
ENSMUSG00000045065	3.34061	-3.12376	5.78558	2.15264e-06	3.81122e-05	4.54285
ENSMUSG00000056144	-0.857716	5.94284	-5.78528	2.15449e-06	3.81122e-05	4.125
ENSMUSG00000034664	1.2389	4.56859	5.78362	2.1648e-06	3.82547e-05	4.23907
ENSMUSG00000031928	-0.392534	5.41276	-5.78198	2.17507e-06	3.83959e-05	4.09305
ENSMUSG00000021486	0.395176	6.82246	5.78116	2.18021e-06	3.84467e-05	4.06152
ENSMUSG00000087362	-1.07936	0.913085	-5.78039	2.18499e-06	3.84909e-05	4.72633
ENSMUSG00000084949	-0.98462	1.51634	-5.77844	2.19734e-06	3.86681e-05	4.78145
ENSMUSG00000097301	2.32422	-2.02981	5.77785	2.20107e-06	3.86937e-05	4.81371
ENSMUSG00000072582	-0.487105	4.00722	-5.77581	2.21399e-06	3.88804e-05	4.27432
ENSMUSG00000027474	2.6381	-1.41585	5.7729	2.23259e-06	3.91664e-05	4.82962
ENSMUSG00000026781	-0.418086	5.41094	-5.77156	2.24127e-06	3.92778e-05	4.06452
ENSMUSG00000028645	1.00269	5.39803	5.77007	2.25088e-06	3.93817e-05	4.11017
ENSMUSG00000035885	0.548005	6.52666	5.76992	2.25184e-06	3.93817e-05	4.02963
ENSMUSG00000014956	-1.21958	8.04982	-5.7694	2.2552e-06	3.93997e-05	4.08583
ENSMUSG00000041361	0.872833	2.52208	5.76698	2.27097e-06	3.96342e-05	4.53271
ENSMUSG00000084315	-0.905488	1.89561	-5.76301	2.29709e-06	4.00488e-05	4.58572
ENSMUSG00000020516	-0.384775	5.95304	-5.76016	2.31597e-06	4.03365e-05	4.00429
ENSMUSG00000029676	-0.517121	4.80247	-5.75877	2.32527e-06	4.04569e-05	4.08229
ENSMUSG00000095432	-1.0762	4.45134	-5.75678	2.33866e-06	4.0648e-05	4.19155
ENSMUSG00000035759	-0.817909	1.49121	-5.75615	2.3429e-06	4.06799e-05	4.65064
ENSMUSG00000038552	1.86747	-1.37205	5.75553	2.34704e-06	4.07101e-05	4.78933
ENSMUSG00000008668	0.56905	8.53723	5.74651	2.40881e-06	4.17388e-05	3.98558
ENSMUSG00000097308	-0.875464	2.67848	-5.74501	2.41924e-06	4.18389e-05	4.36988
ENSMUSG00000059355	0.399205	4.74854	5.74496	2.41954e-06	4.18389e-05	4.09214
ENSMUSG00000039114	2.13759	0.698511	5.74398	2.4264e-06	4.19149e-05	4.78466
ENSMUSG00000037262	-0.50559	4.51483	-5.74341	2.43041e-06	4.19413e-05	4.08882
ENSMUSG00000020709	-1.03624	2.79819	-5.74196	2.44058e-06	4.2074e-05	4.38422
ENSMUSG00000043683	0.569111	6.5649	5.73949	2.45797e-06	4.23307e-05	3.94209
ENSMUSG00000026921	1.60587	1.06683	5.73785	2.46957e-06	4.24463e-05	4.61388
ENSMUSG00000008999	1.04486	1.99075	5.73784	2.4697e-06	4.24463e-05	4.55444
ENSMUSG00000096956	1.83676	1.26117	5.73724	2.47391e-06	4.24755e-05	4.64209
ENSMUSG00000036918	0.431653	7.56495	5.73475	2.49177e-06	4.27358e-05	3.9472
ENSMUSG00000034974	0.563977	4.46457	5.73442	2.49412e-06	4.27358e-05	4.10696
ENSMUSG00000052748	-0.508089	5.21428	-5.73228	2.50953e-06	4.29563e-05	3.9701
ENSMUSG00000006262	-0.537384	5.16265	-5.73153	2.51494e-06	4.30055e-05	3.97519
ENSMUSG00000026829	-1.66129	-0.220459	-5.73067	2.52121e-06	4.30692e-05	4.74833
ENSMUSG00000028885	1.60193	2.24689	5.72434	2.56757e-06	4.3817e-05	4.5379
ENSMUSG00000060600	0.875897	4.67195	5.72388	2.57094e-06	4.38302e-05	3.9976
ENSMUSG00000024420	1.86499	0.0237124	5.72108	2.59178e-06	4.41411e-05	4.70492
ENSMUSG00000037818	-0.749807	3.39869	-5.71508	2.63695e-06	4.48653e-05	4.21889
ENSMUSG00000041945	-1.27733	1.57075	-5.71448	2.64149e-06	4.48973e-05	4.47922
ENSMUSG00000027009	-0.648441	9.09381	-5.71192	2.66101e-06	4.51838e-05	3.94268
ENSMUSG00000031556	0.530723	3.92511	5.71148	2.66443e-06	4.51965e-05	4.12225
ENSMUSG00000068856	0.322788	6.24454	5.71112	2.66716e-06	4.51976e-05	3.85891
ENSMUSG00000029713	0.444364	8.01821	5.7046	2.71772e-06	4.60083e-05	3.87689
ENSMUSG00000001964	0.355764	5.7018	5.70361	2.72553e-06	4.60944e-05	3.8576
ENSMUSG00000042745	1.98074	0.724614	5.70278	2.73199e-06	4.61575e-05	4.62261
ENSMUSG00000097236	-2.42293	-1.44447	-5.6993	2.75954e-06	4.65424e-05	4.62857
ENSMUSG00000027962	-1.18674	7.64409	-5.69921	2.76027e-06	4.65424e-05	3.84918
ENSMUSG00000037060	2.53266	-1.43029	5.69743	2.77447e-06	4.67353e-05	4.6451
ENSMUSG00000029528	0.487248	6.79888	5.69022	2.83265e-06	4.7646e-05	3.80043
ENSMUSG00000036257	-0.418382	5.55877	-5.69004	2.83416e-06	4.7646e-05	3.81887
ENSMUSG00000036501	-0.519498	5.96883	-5.68916	2.8413e-06	4.77185e-05	3.79804
ENSMUSG00000023092	1.39245	1.78527	5.68759	2.85421e-06	4.7888e-05	4.43535
ENSMUSG00000031242	-0.484475	4.96338	-5.68626	2.86518e-06	4.80243e-05	3.85598
ENSMUSG00000052146	0.554595	8.99651	5.68168	2.90317e-06	4.85716e-05	3.84484
ENSMUSG00000032244	-0.470228	6.16406	-5.68164	2.90356e-06	4.85716e-05	3.77376
ENSMUSG00000078945	0.607372	5.03613	5.68068	2.91159e-06	4.86109e-05	3.86668
ENSMUSG00000062381	0.572795	5.95796	5.68067	2.91166e-06	4.86109e-05	3.78435
ENSMUSG00000033578	3.26223	-0.928217	5.68027	2.91499e-06	4.86186e-05	4.60146
ENSMUSG00000040818	-0.537514	6.11862	-5.67884	2.92708e-06	4.87722e-05	3.76656
ENSMUSG00000046516	-0.525302	5.42346	-5.67815	2.93292e-06	4.88214e-05	3.79443
ENSMUSG00000047238	1.50141	0.0703237	5.67749	2.93843e-06	4.88652e-05	4.60023
ENSMUSG00000026994	-1.37162	2.72335	-5.67485	2.9609e-06	4.91905e-05	4.24901
ENSMUSG00000054889	3.08037	-1.67983	5.67183	2.98673e-06	4.95275e-05	4.47425
ENSMUSG00000026663	0.437316	6.78547	5.6718	2.98704e-06	4.95275e-05	3.74873
ENSMUSG00000059588	-0.971613	4.2513	-5.67135	2.99094e-06	4.95437e-05	3.93265
ENSMUSG00000044562	1.41137	1.07184	5.66719	3.02695e-06	5.00911e-05	4.4389
ENSMUSG00000060601	0.387319	6.59415	5.66591	3.03818e-06	5.02279e-05	3.72924
ENSMUSG00000032959	0.46982	6.36543	5.66398	3.05514e-06	5.0459e-05	3.72394
ENSMUSG00000063362	-0.671126	4.19882	-5.66308	3.06302e-06	5.05398e-05	3.93826
ENSMUSG00000024511	0.922072	1.76175	5.66022	3.08835e-06	5.09082e-05	4.267
ENSMUSG00000053641	-0.988409	8.1156	-5.65813	3.10703e-06	5.11478e-05	3.75932
ENSMUSG00000042579	-1.1612	2.55183	-5.65792	3.10893e-06	5.11478e-05	4.23232
ENSMUSG00000074922	0.617539	3.59936	5.65641	3.12247e-06	5.13207e-05	3.9897
ENSMUSG00000037762	-1.1432	2.66468	-5.65574	3.12847e-06	5.13389e-05	4.19483
ENSMUSG00000038065	-1.00318	2.81956	-5.65561	3.12964e-06	5.13389e-05	4.15988
ENSMUSG00000059291	0.570216	8.64868	5.65229	3.15974e-06	5.17528e-05	3.75272
ENSMUSG00000046364	0.71913	8.18971	5.65215	3.16099e-06	5.17528e-05	3.72932
ENSMUSG00000045038	1.168	5.64177	5.6486	3.19354e-06	5.22352e-05	3.75109
ENSMUSG00000031785	1.69516	4.41491	5.64775	3.20142e-06	5.23135e-05	3.78205
ENSMUSG00000043794	1.37759	0.224295	5.64651	3.21286e-06	5.24498e-05	4.50017
ENSMUSG00000033543	-0.504784	5.186	-5.64427	3.23361e-06	5.27377e-05	3.71249
ENSMUSG00000004945	0.480229	4.40343	5.63907	3.2825e-06	5.34836e-05	3.82921
ENSMUSG00000067430	-0.682133	2.72884	-5.63633	3.30845e-06	5.38546e-05	4.12087
ENSMUSG00000015854	1.62534	4.88351	5.63574	3.31412e-06	5.38863e-05	3.87924
ENSMUSG00000032112	0.545282	4.85016	5.63546	3.31676e-06	5.38863e-05	3.76673
ENSMUSG00000021786	-0.60852	3.64095	-5.63306	3.33986e-06	5.41951e-05	3.98306
ENSMUSG00000028843	0.836988	7.91445	5.63282	3.34218e-06	5.41951e-05	3.65808
ENSMUSG00000030345	2.44528	0.353185	5.62706	3.39813e-06	5.50497e-05	4.41648
ENSMUSG00000033767	-0.404743	7.79074	-5.62578	3.41062e-06	5.51992e-05	3.64054
ENSMUSG00000070034	0.819276	8.11894	5.62443	3.42396e-06	5.53622e-05	3.65308
ENSMUSG00000074247	0.459965	5.89786	5.62397	3.42851e-06	5.53759e-05	3.62381
ENSMUSG00000087326	-2.56405	-0.570646	-5.62368	3.43135e-06	5.53759e-05	4.46015
ENSMUSG00000052852	-1.80522	-0.749773	-5.6193	3.47492e-06	5.59778e-05	4.44102
ENSMUSG00000040605	3.67724	-2.11375	5.61927	3.47526e-06	5.59778e-05	4.19474
ENSMUSG00000034145	2.27748	-1.11725	5.61854	3.48253e-06	5.60416e-05	4.40776
ENSMUSG00000015305	-1.10136	4.81841	-5.6181	3.487e-06	5.60603e-05	3.71097
ENSMUSG00000023036	0.848984	2.66605	5.61598	3.50833e-06	5.63497e-05	4.14902
ENSMUSG00000031633	0.482367	6.16119	5.61417	3.52675e-06	5.65918e-05	3.58478
ENSMUSG00000042286	2.00909	1.33709	5.61094	3.5597e-06	5.70664e-05	4.30246
ENSMUSG00000028402	2.44953	-2.22214	5.60764	3.59369e-06	5.75569e-05	4.37878
ENSMUSG00000021716	-0.433131	4.05305	-5.60323	3.6397e-06	5.82386e-05	3.71449
ENSMUSG00000024287	-0.422434	5.38106	-5.60258	3.64651e-06	5.82926e-05	3.58158
ENSMUSG00000037563	0.88746	8.7567	5.60131	3.65997e-06	5.84525e-05	3.59863
ENSMUSG00000032393	-0.325703	7.10714	-5.60079	3.66544e-06	5.84846e-05	3.55319
ENSMUSG00000024401	0.827435	3.42922	5.60032	3.67043e-06	5.85091e-05	3.91599
ENSMUSG00000051650	0.879654	6.70533	5.59546	3.72222e-06	5.92429e-05	3.53079
ENSMUSG00000039485	-0.837443	3.70714	-5.59534	3.72346e-06	5.92429e-05	3.83337
ENSMUSG00000062198	-0.68518	3.37457	-5.593	3.74869e-06	5.95883e-05	3.8349
ENSMUSG00000087174	-0.794172	3.8554	-5.59254	3.75362e-06	5.96108e-05	3.77136
ENSMUSG00000056899	1.00329	1.57633	5.59158	3.76407e-06	5.97207e-05	4.19796
ENSMUSG00000069208	-0.855698	2.65769	-5.59079	3.77266e-06	5.97806e-05	3.99197
ENSMUSG00000047215	0.545906	9.55374	5.59034	3.77754e-06	5.97806e-05	3.60364
ENSMUSG00000029769	3.10106	-1.4784	5.59026	3.77844e-06	5.97806e-05	4.23751
ENSMUSG00000045215	-2.13825	-2.53833	-5.58838	3.79894e-06	6.00388e-05	4.27055
ENSMUSG00000020074	-0.342196	6.78304	-5.58812	3.80185e-06	6.00388e-05	3.50914
ENSMUSG00000027524	2.56526	-1.31552	5.58688	3.81542e-06	6.01969e-05	4.23594
ENSMUSG00000071644	0.340224	9.39535	5.58538	3.83201e-06	6.04023e-05	3.58579
ENSMUSG00000022184	0.690432	3.95697	5.5842	3.84502e-06	6.0551e-05	3.74144
ENSMUSG00000084416	0.617109	8.11295	5.57466	3.95231e-06	6.21827e-05	3.50486
ENSMUSG00000048191	-1.20057	3.04638	-5.57391	3.96085e-06	6.22592e-05	3.80875
ENSMUSG00000048277	0.515617	6.40526	5.5735	3.96556e-06	6.22755e-05	3.47188
ENSMUSG00000034518	-0.31078	5.07961	-5.57303	3.97086e-06	6.23009e-05	3.52122
ENSMUSG00000037112	-0.642789	4.91656	-5.57094	3.99485e-06	6.25819e-05	3.55265
ENSMUSG00000035329	0.400384	5.36797	5.57083	3.99616e-06	6.25819e-05	3.50471
ENSMUSG00000025034	0.719356	6.28248	5.56662	4.04504e-06	6.32888e-05	3.45343
ENSMUSG00000098183	-1.54588	1.29614	-5.56233	4.09533e-06	6.40165e-05	4.08511
ENSMUSG00000052160	0.818546	7.69165	5.56167	4.10313e-06	6.40792e-05	3.45301
ENSMUSG00000053291	0.702309	5.96831	5.56125	4.10817e-06	6.40988e-05	3.44327
ENSMUSG00000044966	-1.45499	1.94184	-5.56066	4.11508e-06	6.41475e-05	3.9661
ENSMUSG00000059005	-0.474929	9.6632	-5.5581	4.14562e-06	6.45641e-05	3.52458
ENSMUSG00000012429	-0.528533	4.15005	-5.55504	4.18234e-06	6.50618e-05	3.6251
ENSMUSG00000041797	-0.933214	3.22062	-5.5545	4.18885e-06	6.50618e-05	3.78029
ENSMUSG00000054939	-0.986482	1.42785	-5.55448	4.1891e-06	6.50618e-05	4.12576
ENSMUSG00000070923	-0.370401	5.79562	-5.55246	4.21357e-06	6.53818e-05	3.40905
ENSMUSG00000024037	0.493157	4.82071	5.55132	4.22751e-06	6.55357e-05	3.50841
ENSMUSG00000009376	2.33111	1.97148	5.55101	4.23123e-06	6.55357e-05	4.05848
ENSMUSG00000071657	0.431214	5.76591	5.54176	4.34571e-06	6.72472e-05	3.38854
ENSMUSG00000058571	-0.973248	1.96556	-5.54052	4.36126e-06	6.74262e-05	3.87326
ENSMUSG00000036943	-0.695713	7.03802	-5.53948	4.37439e-06	6.75676e-05	3.37882
ENSMUSG00000044350	0.883939	4.87165	5.53881	4.38288e-06	6.7637e-05	3.38508
ENSMUSG00000050721	0.421056	7.34522	5.53649	4.41225e-06	6.79944e-05	3.37446
ENSMUSG00000045573	1.86862	0.70516	5.53631	4.41461e-06	6.79944e-05	4.21962
ENSMUSG00000004542	-1.73057	-1.07039	-5.53603	4.41809e-06	6.79944e-05	4.22232
ENSMUSG00000061462	3.416	2.665	5.53306	4.45609e-06	6.85169e-05	3.78345
ENSMUSG00000063894	-0.890855	4.87305	-5.53226	4.46638e-06	6.86129e-05	3.4322
ENSMUSG00000053626	-2.83458	-3.47755	-5.53004	4.49515e-06	6.89923e-05	3.85547
ENSMUSG00000008763	-0.353376	6.18066	-5.52775	4.52496e-06	6.93868e-05	3.33341
ENSMUSG00000041841	0.544068	7.7594	5.52738	4.52975e-06	6.93975e-05	3.35671
ENSMUSG00000047731	0.45372	6.7856	5.52705	4.53412e-06	6.94016e-05	3.3315
ENSMUSG00000001247	0.876356	2.01669	5.52639	4.54275e-06	6.94708e-05	3.96582
ENSMUSG00000028427	-1.59627	0.549168	-5.5251	4.55963e-06	6.9666e-05	4.12913
ENSMUSG00000055323	-3.28071	-1.8835	-5.52315	4.58531e-06	6.99952e-05	3.97727
ENSMUSG00000038665	-1.76365	1.23305	-5.52145	4.60785e-06	7.02759e-05	4.06049
ENSMUSG00000029416	0.944473	6.29873	5.52028	4.62354e-06	7.04518e-05	3.32216
ENSMUSG00000037703	-0.570834	2.36033	-5.51926	4.63709e-06	7.05946e-05	3.8047
ENSMUSG00000016541	0.448972	5.67603	5.51804	4.65353e-06	7.07814e-05	3.33192
ENSMUSG00000044150	-0.617917	4.38722	-5.51528	4.6907e-06	7.12827e-05	3.43657
ENSMUSG00000073197	-1.02828	2.61568	-5.5145	4.70124e-06	7.13787e-05	3.81969
ENSMUSG00000062101	-0.893023	2.2935	-5.51363	4.71307e-06	7.14942e-05	3.84046
ENSMUSG00000043895	0.997819	3.18267	5.5129	4.72306e-06	7.15816e-05	3.79946
ENSMUSG00000024737	0.731267	4.66385	5.51142	4.74324e-06	7.18232e-05	3.43253
ENSMUSG00000021540	-0.618571	5.69508	-5.50778	4.79326e-06	7.25157e-05	3.29733
ENSMUSG00000056234	-1.40024	8.11852	-5.50633	4.81331e-06	7.27436e-05	3.34168
ENSMUSG00000042289	1.05851	3.67226	5.50608	4.81691e-06	7.27436e-05	3.58082
ENSMUSG00000094248	-2.06343	3.70848	-5.50468	4.83634e-06	7.29446e-05	3.33411
ENSMUSG00000009630	0.401158	5.8313	5.50442	4.84e-06	7.29446e-05	3.28062
ENSMUSG00000035694	-1.41207	1.61766	-5.50419	4.84316e-06	7.29446e-05	3.89684
ENSMUSG00000026361	-0.442888	5.72532	-5.50281	4.86257e-06	7.31719e-05	3.27433
ENSMUSG00000071337	-0.628826	6.27773	-5.5005	4.89509e-06	7.35768e-05	3.25283
ENSMUSG00000036985	0.649041	5.25261	5.50028	4.89817e-06	7.35768e-05	3.30953
ENSMUSG00000033623	-0.519967	5.05484	-5.49677	4.94796e-06	7.42588e-05	3.30513
ENSMUSG00000021732	-1.82559	-1.23389	-5.4938	4.99065e-06	7.48332e-05	4.10332
ENSMUSG00000041762	-0.759743	4.77193	-5.49282	5.00466e-06	7.49768e-05	3.3547
ENSMUSG00000093514	1.07809	4.75315	5.49245	5.01007e-06	7.49915e-05	3.41428
ENSMUSG00000001687	0.724672	6.74532	5.49196	5.01714e-06	7.50311e-05	3.23139
ENSMUSG00000028826	-0.436645	5.84447	-5.49099	5.03126e-06	7.51758e-05	3.23088
ENSMUSG00000023456	0.50682	6.27208	5.49011	5.044e-06	7.52998e-05	3.22403
ENSMUSG00000085125	-1.19875	0.358905	-5.48933	5.05537e-06	7.54029e-05	4.05308
ENSMUSG00000055228	-0.943823	2.77261	-5.48331	5.14391e-06	7.6637e-05	3.67024
ENSMUSG00000097123	-2.05563	-0.0536099	-5.4831	5.14716e-06	7.6637e-05	4.07204
ENSMUSG00000030792	1.06288	2.09001	5.48199	5.16363e-06	7.68147e-05	3.72407
ENSMUSG00000078861	-0.808525	1.63881	-5.48081	5.18122e-06	7.70086e-05	3.85252
ENSMUSG00000037204	0.51353	4.13551	5.48008	5.1922e-06	7.71041e-05	3.44136
ENSMUSG00000053080	-0.666469	2.82284	-5.47883	5.21094e-06	7.73146e-05	3.66006
ENSMUSG00000048000	-0.340417	6.6147	-5.47497	5.26923e-06	7.8111e-05	3.17936
ENSMUSG00000045211	0.641626	3.58113	5.47378	5.28742e-06	7.82974e-05	3.52581
ENSMUSG00000040370	-0.496525	3.37359	-5.47354	5.29105e-06	7.82974e-05	3.51894
ENSMUSG00000029179	-0.41683	4.28496	-5.47273	5.30343e-06	7.8412e-05	3.37361
ENSMUSG00000074829	-0.893358	3.50631	-5.47113	5.32794e-06	7.87057e-05	3.48313
ENSMUSG00000033220	0.671949	9.53437	5.46961	5.35144e-06	7.89424e-05	3.25458
ENSMUSG00000083012	-2.81308	3.32409	-5.46944	5.3541e-06	7.89424e-05	3.4048
ENSMUSG00000022824	2.28047	1.99332	5.46919	5.35795e-06	7.89424e-05	3.76209
ENSMUSG00000030682	0.427588	6.34559	5.46871	5.36533e-06	7.89824e-05	3.16203
ENSMUSG00000087624	-1.27436	0.784322	-5.4677	5.381e-06	7.91119e-05	3.94809
ENSMUSG00000036241	-1.00967	7.01231	-5.46754	5.38348e-06	7.91119e-05	3.18253
ENSMUSG00000000278	0.608059	6.18065	5.46705	5.39104e-06	7.91543e-05	3.16143
ENSMUSG00000064068	0.347186	4.74415	5.46644	5.40063e-06	7.91728e-05	3.28503
ENSMUSG00000096929	-1.14007	1.89976	-5.46637	5.40166e-06	7.91728e-05	3.76417
ENSMUSG00000061311	-3.36837	-0.232915	-5.46602	5.40713e-06	7.91845e-05	3.90888
ENSMUSG00000078441	0.639706	5.40617	5.4654	5.41677e-06	7.92571e-05	3.20885
ENSMUSG00000029096	1.25484	-0.179438	5.46152	5.47787e-06	8.00308e-05	3.94042
ENSMUSG00000032383	0.409446	7.08312	5.46138	5.48002e-06	8.00308e-05	3.14969
ENSMUSG00000055629	1.1261	1.86563	5.46114	5.48383e-06	8.00308e-05	3.82396
ENSMUSG00000090674	-2.21114	-1.27798	-5.4565	5.55781e-06	8.10406e-05	4.00216
ENSMUSG00000019539	1.26873	3.84853	5.45042	5.65616e-06	8.24037e-05	3.41619
ENSMUSG00000089944	1.36491	1.47216	5.44842	5.68891e-06	8.28096e-05	3.78868
ENSMUSG00000078193	0.389602	6.98141	5.44538	5.7391e-06	8.34122e-05	3.10196
ENSMUSG00000098950	-0.522518	5.82569	-5.44531	5.74016e-06	8.34122e-05	3.10833
ENSMUSG00000027222	0.57423	3.71268	5.44485	5.74792e-06	8.34534e-05	3.39864
ENSMUSG00000021661	-0.402458	4.58586	-5.44309	5.77718e-06	8.38063e-05	3.22063
ENSMUSG00000022231	2.03587	3.36873	5.44203	5.79477e-06	8.39894e-05	3.50382
ENSMUSG00000033364	-0.520785	5.37699	-5.44161	5.80189e-06	8.40207e-05	3.12796
ENSMUSG00000097737	-1.19601	1.06897	-5.44035	5.82293e-06	8.42532e-05	3.86482
ENSMUSG00000098148	-0.56585	4.22543	-5.43817	5.8598e-06	8.47143e-05	3.26239
ENSMUSG00000046159	2.17319	-0.612048	5.43776	5.86676e-06	8.47426e-05	3.94241
ENSMUSG00000005553	1.51386	-0.329845	5.43512	5.91157e-06	8.53172e-05	3.81567
ENSMUSG00000005566	0.360624	7.64222	5.43165	5.97111e-06	8.61029e-05	3.07965
ENSMUSG00000084031	-1.10711	1.52126	-5.43098	5.98264e-06	8.61958e-05	3.70718
ENSMUSG00000040321	-0.679211	4.11393	-5.43025	5.99531e-06	8.63049e-05	3.25161
ENSMUSG00000050697	-0.382901	5.85551	-5.42866	6.02288e-06	8.66282e-05	3.04834
ENSMUSG00000054450	-2.08313	-1.71444	-5.42768	6.03992e-06	8.67282e-05	3.88433
ENSMUSG00000033420	1.86183	0.738806	5.42767	6.04008e-06	8.67282e-05	3.73528
ENSMUSG00000026192	0.317994	6.55132	5.42679	6.05547e-06	8.68754e-05	3.03999
ENSMUSG00000038807	0.66024	5.75062	5.42613	6.06706e-06	8.69681e-05	3.04746
ENSMUSG00000040811	0.440548	4.54205	5.42524	6.08258e-06	8.70867e-05	3.19151
ENSMUSG00000063108	-0.753036	5.42054	-5.42507	6.08563e-06	8.70867e-05	3.08249
ENSMUSG00000038535	-0.457521	5.48997	-5.42302	6.12168e-06	8.75286e-05	3.06231
ENSMUSG00000034842	1.37295	1.68469	5.42251	6.13078e-06	8.75848e-05	3.57122
ENSMUSG00000061787	0.442882	8.62479	5.41898	6.19347e-06	8.84058e-05	3.07698
ENSMUSG00000037253	0.409268	5.68997	5.41865	6.19938e-06	8.84155e-05	3.04044
ENSMUSG00000022387	0.519261	6.9048	5.41618	6.24376e-06	8.89736e-05	3.01482
ENSMUSG00000032826	-1.12104	1.59622	-5.41535	6.25876e-06	8.90557e-05	3.65791
ENSMUSG00000030744	0.453134	10.0167	5.41528	6.26004e-06	8.90557e-05	3.12248
ENSMUSG00000078706	-2.07336	-1.10358	-5.41238	6.31265e-06	8.97287e-05	3.88278
ENSMUSG00000024855	0.442206	7.1183	5.41159	6.32703e-06	8.98576e-05	3.00671
ENSMUSG00000037608	-0.35164	7.6519	-5.41082	6.34118e-06	8.99831e-05	3.02429
ENSMUSG00000063931	0.593718	4.97188	5.40982	6.35948e-06	9.01673e-05	3.05787
ENSMUSG00000034892	0.780493	9.17989	5.40812	6.39073e-06	9.04771e-05	3.05928
ENSMUSG00000027804	-0.448251	5.88043	-5.40788	6.39517e-06	9.04771e-05	2.99126
ENSMUSG00000038456	1.72999	0.91565	5.40776	6.39737e-06	9.04771e-05	3.69007
ENSMUSG00000041958	0.473877	6.19519	5.40423	6.46295e-06	9.13283e-05	2.98001
ENSMUSG00000037683	1.32355	0.881339	5.4034	6.47849e-06	9.14716e-05	3.82059
ENSMUSG00000030759	-0.432225	7.00657	-5.40171	6.51015e-06	9.17789e-05	2.97518
ENSMUSG00000037343	-0.388328	5.77253	-5.40166	6.5111e-06	9.17789e-05	2.97868
ENSMUSG00000052539	-1.02609	2.85503	-5.3992	6.55749e-06	9.23558e-05	3.47697
ENSMUSG00000040599	-0.641153	5.39581	-5.39779	6.5842e-06	9.2655e-05	2.99617
ENSMUSG00000009687	0.734655	7.48898	5.39697	6.59973e-06	9.27963e-05	2.97243
ENSMUSG00000049401	0.400714	6.59162	5.39588	6.62064e-06	9.30131e-05	2.95143
ENSMUSG00000040212	0.63521	5.89943	5.39019	6.73029e-06	9.44751e-05	2.95675
ENSMUSG00000025921	1.11231	3.79265	5.38518	6.82825e-06	9.57709e-05	3.19569
ENSMUSG00000046314	-1.29856	1.13972	-5.38407	6.8503e-06	9.60005e-05	3.67794
ENSMUSG00000033088	0.322304	5.92986	5.38088	6.91371e-06	9.68091e-05	2.91556
ENSMUSG00000049608	1.14067	3.62339	5.37686	6.99423e-06	9.78556e-05	3.21728
ENSMUSG00000078670	1.12434	1.85916	5.37643	7.00297e-06	9.7897e-05	3.59648
ENSMUSG00000027806	0.545638	5.54891	5.37467	7.03865e-06	9.83146e-05	2.9368
ENSMUSG00000027082	1.12415	2.55939	5.37411	7.0501e-06	9.83933e-05	3.36352
ENSMUSG00000031245	-0.676526	4.91766	-5.37332	7.06617e-06	9.85363e-05	2.96105
ENSMUSG00000002205	0.432465	6.00369	5.37235	7.08593e-06	9.87306e-05	2.89032
ENSMUSG00000027852	-0.283196	6.71697	-5.372	7.09313e-06	9.87497e-05	2.88408
ENSMUSG00000029304	2.55409	0.333047	5.37146	7.10424e-06	9.88231e-05	3.77435
ENSMUSG00000023050	1.10085	2.58782	5.37008	7.13266e-06	9.9137e-05	3.39637
ENSMUSG00000021460	0.738726	5.01581	5.36913	7.15211e-06	9.93258e-05	2.94583
ENSMUSG00000033768	-1.03267	0.697265	-5.36807	7.17416e-06	9.95503e-05	3.65481
ENSMUSG00000079614	-0.454228	5.83932	-5.36697	7.19697e-06	9.9785e-05	2.87575
ENSMUSG00000017978	2.54601	-2.04233	5.3631	7.27776e-06	0.00010078	3.70848
ENSMUSG00000022146	3.15041	-2.68489	5.36251	7.29018e-06	0.00010078	3.56486
ENSMUSG00000085408	-1.09293	0.482286	-5.36245	7.29152e-06	0.00010078	3.67167
ENSMUSG00000018593	1.88889	1.7767	5.3624	7.29253e-06	0.00010078	3.44065
ENSMUSG00000031029	0.602749	8.36644	5.36157	7.31005e-06	0.00010094	2.89782
ENSMUSG00000039153	0.993679	4.69156	5.35914	7.36144e-06	0.000101566	2.96156
ENSMUSG00000019998	0.485978	6.45486	5.35812	7.3831e-06	0.000101782	2.84338
ENSMUSG00000024248	0.562869	7.19192	5.35674	7.4127e-06	0.000102107	2.84531
ENSMUSG00000020459	-0.394055	4.85384	-5.35539	7.44151e-06	0.000102421	2.9472
ENSMUSG00000039470	-1.01947	2.41889	-5.35369	7.47824e-06	0.00010277	3.38325
ENSMUSG00000044471	2.00491	-0.555472	5.35321	7.48863e-06	0.00010277	3.72713
ENSMUSG00000038544	-0.402349	5.35865	-5.35315	7.48981e-06	0.00010277	2.88241
ENSMUSG00000057924	-1.2661	0.993452	-5.35309	7.49115e-06	0.00010277	3.56709
ENSMUSG00000085894	-0.818871	1.81266	-5.35215	7.51153e-06	0.000102966	3.46122
ENSMUSG00000057322	0.679224	7.53646	5.3509	7.53879e-06	0.000103256	2.83911
ENSMUSG00000005204	0.29452	6.20633	5.34724	7.61882e-06	0.000104268	2.81168
ENSMUSG00000029372	1.38818	3.60813	5.346	7.64621e-06	0.000104558	3.2522
ENSMUSG00000029263	-0.733402	3.37955	-5.34503	7.66746e-06	0.000104764	3.15291
ENSMUSG00000040732	1.79852	1.1054	5.34322	7.70775e-06	0.000105229	3.48327
ENSMUSG00000004591	-0.848699	6.47559	-5.34277	7.71771e-06	0.00010528	2.80313
ENSMUSG00000096917	-1.71503	1.79433	-5.34116	7.7537e-06	0.000105637	3.28214
ENSMUSG00000024182	0.495083	6.66944	5.34104	7.75635e-06	0.000105637	2.79483
ENSMUSG00000000594	0.674888	7.84505	5.34013	7.77686e-06	0.000105832	2.81144
ENSMUSG00000073628	1.093	4.2007	5.33829	7.81836e-06	0.000106311	2.9749
ENSMUSG00000051236	2.07889	-0.657794	5.33784	7.82838e-06	0.000106362	3.68388
ENSMUSG00000024174	-0.393687	5.64784	-5.3373	7.84073e-06	0.000106444	2.7946
ENSMUSG00000063663	-0.849448	4.93958	-5.3347	7.89973e-06	0.000107159	2.88717
ENSMUSG00000078896	-1.23368	0.8999	-5.33441	7.90624e-06	0.000107161	3.54327
ENSMUSG00000061136	-0.408806	6.98599	-5.33301	7.93824e-06	0.000107509	2.78069
ENSMUSG00000022000	-0.339658	6.54454	-5.32879	8.0356e-06	0.000108741	2.75826
ENSMUSG00000030322	-0.435239	5.20193	-5.32841	8.0446e-06	0.000108776	2.82086
ENSMUSG00000000753	1.3694	0.254618	5.32617	8.09661e-06	0.000109391	3.62441
ENSMUSG00000094924	-1.43372	4.71097	-5.32546	8.11337e-06	0.000109531	2.92917
ENSMUSG00000037315	-0.717556	3.60675	-5.32504	8.12306e-06	0.000109574	2.99864
ENSMUSG00000074874	0.986525	2.48335	5.32314	8.16777e-06	0.000110089	3.28111
ENSMUSG00000037966	0.687794	4.22292	5.32264	8.17973e-06	0.000110163	2.97976
ENSMUSG00000040242	-0.403738	7.21489	-5.32201	8.19446e-06	0.000110273	2.7565
ENSMUSG00000096433	-0.754053	4.39843	-5.31968	8.24979e-06	0.00011093	2.88811
ENSMUSG00000060477	0.629355	6.47601	5.3187	8.27316e-06	0.000111156	2.73129
ENSMUSG00000039449	-0.500736	6.31366	-5.31783	8.29413e-06	0.000111349	2.72617
ENSMUSG00000097769	-0.739737	2.30883	-5.31744	8.30347e-06	0.000111386	3.26683
ENSMUSG00000036599	0.598736	4.9019	5.31619	8.33341e-06	0.000111699	2.83801
ENSMUSG00000013787	0.536577	7.38087	5.31535	8.35361e-06	0.000111882	2.73782
ENSMUSG00000029772	0.485438	6.14338	5.31428	8.37957e-06	0.00011214	2.71786
ENSMUSG00000024048	0.429635	7.34612	5.31206	8.43336e-06	0.000112771	2.72686
ENSMUSG00000040774	-0.410088	5.52598	-5.31059	8.46921e-06	0.000113126	2.72993
ENSMUSG00000038615	0.322592	7.03754	5.31043	8.47324e-06	0.000113126	2.71319
ENSMUSG00000094509	3.43834	2.18295	5.30802	8.53237e-06	0.000113826	3.39797
ENSMUSG00000036356	1.17444	1.07922	5.30758	8.54325e-06	0.000113881	3.3649
ENSMUSG00000019579	0.382767	4.6899	5.30564	8.59121e-06	0.00011443	2.82942
ENSMUSG00000002103	-0.548792	5.37183	-5.30512	8.60402e-06	0.000114483	2.73307
ENSMUSG00000027132	-0.77585	3.76957	-5.30491	8.6094e-06	0.000114483	2.93529
ENSMUSG00000085008	-1.05734	1.40849	-5.30466	8.61548e-06	0.000114483	3.35433
ENSMUSG00000039208	1.29465	3.18378	5.30406	8.63051e-06	0.000114593	3.13407
ENSMUSG00000033047	0.303376	6.9523	5.30211	8.67912e-06	0.000115148	2.68978
ENSMUSG00000017670	0.506007	6.29994	5.30157	8.69284e-06	0.00011524	2.68114
ENSMUSG00000073403	0.579089	3.25376	5.29996	8.73314e-06	0.000115683	2.90819
ENSMUSG00000086682	-1.27464	1.05195	-5.29878	8.76313e-06	0.00011599	3.4373
ENSMUSG00000086130	-0.37681	5.99467	-5.29647	8.82172e-06	0.000116674	2.66913
ENSMUSG00000022912	0.850414	2.52041	5.29466	8.8679e-06	0.00011715	3.21641
ENSMUSG00000094942	-1.42732	1.63834	-5.29452	8.87154e-06	0.00011715	3.34381
ENSMUSG00000039706	3.04602	-2.27435	5.29304	8.90947e-06	0.000117559	3.48742
ENSMUSG00000035151	-0.485167	5.14629	-5.29183	8.94066e-06	0.000117879	2.71072
ENSMUSG00000030604	-1.12274	1.20227	-5.29102	8.96167e-06	0.000118064	3.41934
ENSMUSG00000006315	0.651862	4.36434	5.29032	8.97985e-06	0.000118211	2.82867
ENSMUSG00000038188	1.00132	1.41228	5.28965	8.99721e-06	0.000118348	3.34164
ENSMUSG00000030064	-0.937362	4.71868	-5.28499	9.11892e-06	0.000119826	2.763
ENSMUSG00000041058	-0.581795	5.09533	-5.28462	9.12868e-06	0.000119826	2.70941
ENSMUSG00000068463	-1.64007	0.324397	-5.28454	9.13081e-06	0.000119826	3.51789
ENSMUSG00000069874	-0.996129	6.36214	-5.28404	9.144e-06	0.000119906	2.63682
ENSMUSG00000066042	-0.741768	2.75811	-5.28291	9.17407e-06	0.000120207	3.10249
ENSMUSG00000037085	-0.748659	3.4561	-5.28168	9.20662e-06	0.00012054	2.92349
ENSMUSG00000029178	-0.53356	7.18332	-5.28007	9.24959e-06	0.00012101	2.63827
ENSMUSG00000033972	-0.84745	3.80293	-5.27969	9.25954e-06	0.000121046	2.90542
ENSMUSG00000030314	0.342493	4.93904	5.2784	9.29408e-06	0.000121333	2.71424
ENSMUSG00000032042	0.306137	7.05445	5.27834	9.2958e-06	0.000121333	2.6236
ENSMUSG00000026608	0.512827	5.26976	5.27737	9.32194e-06	0.00012158	2.67813
ENSMUSG00000047514	0.358349	6.52726	5.27552	9.37194e-06	0.000122138	2.60513
ENSMUSG00000049122	-2.76467	-2.48385	-5.27491	9.38825e-06	0.000122257	3.44378
ENSMUSG00000039244	0.364843	5.20551	5.27449	9.39962e-06	0.000122311	2.6677
ENSMUSG00000002847	2.72235	-2.49818	5.27346	9.42772e-06	0.000122582	3.39303
ENSMUSG00000030697	0.470737	6.79412	5.27291	9.44271e-06	0.000122644	2.5994
ENSMUSG00000033411	-0.474062	5.50563	-5.2727	9.44849e-06	0.000122644	2.62656
ENSMUSG00000055720	0.336287	5.50622	5.27249	9.4542e-06	0.000122644	2.62588
ENSMUSG00000038700	3.02552	-1.96126	5.27202	9.46708e-06	0.000122717	3.41579
ENSMUSG00000029598	0.403591	5.60137	5.27089	9.49796e-06	0.000123023	2.62708
ENSMUSG00000036810	-0.508355	4.6842	-5.26899	9.55028e-06	0.000123606	2.70241
ENSMUSG00000070369	-1.09656	6.05783	-5.26711	9.6021e-06	0.000124182	2.59261
ENSMUSG00000050332	-0.808218	4.26202	-5.26579	9.63886e-06	0.000124562	2.81514
ENSMUSG00000003948	0.60187	5.18628	5.26537	9.65051e-06	0.000124617	2.6323
ENSMUSG00000012422	-0.323759	5.58246	-5.26449	9.67508e-06	0.0001248	2.60005
ENSMUSG00000057842	-0.8266	4.12355	-5.26434	9.67941e-06	0.0001248	2.79479
ENSMUSG00000032740	-0.603179	4.83959	-5.25939	9.81877e-06	0.000126501	2.63516
ENSMUSG00000081291	-1.01461	4.19056	-5.25775	9.86533e-06	0.000127004	2.71733
ENSMUSG00000037913	-0.646138	3.27848	-5.2541	9.96983e-06	0.000128252	2.96185
ENSMUSG00000032525	-0.450347	7.61285	-5.25354	9.98594e-06	0.000128361	2.56523
ENSMUSG00000028337	0.686458	6.91709	5.25275	1.00086e-05	0.000128555	2.54988
ENSMUSG00000006527	-0.628286	5.3331	-5.25099	1.00597e-05	0.000129114	2.56286
ENSMUSG00000017837	0.408335	4.84613	5.25062	1.00706e-05	0.000129155	2.65387
ENSMUSG00000041134	2.90299	-1.47158	5.25032	1.00791e-05	0.000129167	3.41469
ENSMUSG00000032280	0.6743	7.44926	5.24857	1.01303e-05	0.00012967	2.54052
ENSMUSG00000079477	0.321426	7.59713	5.24845	1.01337e-05	0.00012967	2.54864
ENSMUSG00000071451	0.743857	2.86645	5.24573	1.02137e-05	0.000130595	3.0079
ENSMUSG00000008682	0.462915	10.0116	5.24374	1.02724e-05	0.000131246	2.62772
ENSMUSG00000003299	0.430233	4.95811	5.24285	1.02991e-05	0.000131488	2.61502
ENSMUSG00000022560	0.604094	4.06179	5.242	1.03241e-05	0.000131663	2.78356
ENSMUSG00000039384	1.05275	4.68224	5.24186	1.03284e-05	0.000131663	2.66013
ENSMUSG00000037638	0.834338	2.93427	5.24013	1.03801e-05	0.000132223	3.05808
ENSMUSG00000027365	-0.490486	6.77001	-5.23971	1.03928e-05	0.000132285	2.50544
ENSMUSG00000097715	1.03943	3.76272	5.23882	1.04194e-05	0.000132525	2.81384
ENSMUSG00000029291	-0.621033	3.38501	-5.23505	1.05336e-05	0.000133876	2.80381
ENSMUSG00000024044	-0.98465	3.86746	-5.23422	1.05588e-05	0.000134038	2.7513
ENSMUSG00000028478	0.384545	7.16414	5.23411	1.05622e-05	0.000134038	2.49713
ENSMUSG00000097793	-1.19419	1.29592	-5.23354	1.05796e-05	0.000134159	3.17173
ENSMUSG00000048924	-0.551797	4.40813	-5.23084	1.06624e-05	0.000135108	2.6769
ENSMUSG00000039167	1.75893	1.27686	5.23014	1.06839e-05	0.000135279	3.11785
ENSMUSG00000040423	-0.465394	6.81604	-5.22956	1.07018e-05	0.000135404	2.47745
ENSMUSG00000053565	0.324333	6.98024	5.22917	1.07139e-05	0.000135456	2.47867
ENSMUSG00000055900	-0.370398	3.95818	-5.22874	1.07271e-05	0.000135522	2.7018
ENSMUSG00000030814	0.49156	4.71516	5.22799	1.07505e-05	0.000135716	2.58178
ENSMUSG00000060636	0.734859	7.75292	5.22713	1.07773e-05	0.000135953	2.47159
ENSMUSG00000048031	1.4416	5.33679	5.22604	1.0811e-05	0.000136276	2.53561
ENSMUSG00000031827	0.606512	8.40567	5.22572	1.0821e-05	0.000136301	2.50209
ENSMUSG00000015757	-0.337689	6.4722	-5.22522	1.08367e-05	0.000136318	2.46013
ENSMUSG00000016150	-2.00746	-0.935209	-5.22517	1.08384e-05	0.000136318	3.38044
ENSMUSG00000041073	-1.00849	2.52061	-5.22306	1.09045e-05	0.000137017	3.04273
ENSMUSG00000025473	0.906124	4.64003	5.22288	1.09102e-05	0.000137017	2.66608
ENSMUSG00000042686	3.50575	-0.950585	5.22207	1.09359e-05	0.000137237	3.37207
ENSMUSG00000040009	1.67836	0.678282	5.21998	1.1002e-05	0.000137966	3.34257
ENSMUSG00000090576	1.69699	-0.975232	5.21625	1.1121e-05	0.000139254	3.35557
ENSMUSG00000001289	0.629545	6.73259	5.21625	1.11212e-05	0.000139254	2.43747
ENSMUSG00000006310	1.67108	4.2897	5.21338	1.12138e-05	0.000140309	2.55085
ENSMUSG00000020734	3.05262	-1.2968	5.21157	1.12723e-05	0.000140937	3.33165
ENSMUSG00000020321	0.474205	7.11814	5.20918	1.13503e-05	0.000141808	2.42527
ENSMUSG00000045176	0.587368	4.22999	5.20833	1.13784e-05	0.000141983	2.6451
ENSMUSG00000027314	2.08103	-0.59543	5.20825	1.13811e-05	0.000141983	3.33613
ENSMUSG00000020990	-1.5677	2.76603	-5.20749	1.14059e-05	0.000142187	2.83411
ENSMUSG00000084274	-0.844955	1.16713	-5.20655	1.14368e-05	0.000142372	3.12371
ENSMUSG00000029053	1.0743	4.01765	5.20653	1.14375e-05	0.000142372	2.70043
ENSMUSG00000031600	-0.44683	5.09645	-5.20497	1.14892e-05	0.00014291	2.46127
ENSMUSG00000048550	0.942036	2.31812	5.20256	1.15695e-05	0.000143804	2.98579
ENSMUSG00000044667	-2.0103	-1.05923	-5.20217	1.15824e-05	0.000143858	3.30336
ENSMUSG00000025173	0.445862	5.17499	5.20139	1.16086e-05	0.000144078	2.46855
ENSMUSG00000005823	0.447226	5.53137	5.20061	1.16349e-05	0.000144299	2.42974
ENSMUSG00000026096	-0.70239	3.72407	-5.19922	1.16814e-05	0.000144769	2.6506
ENSMUSG00000037649	0.972114	7.44469	5.19864	1.17012e-05	0.000144908	2.39881
ENSMUSG00000031488	0.676445	5.60024	5.19782	1.17289e-05	0.000145145	2.41254
ENSMUSG00000023439	4.1639	0.185687	5.19477	1.18327e-05	0.000146323	3.13208
ENSMUSG00000021771	0.30355	6.95256	5.19406	1.18569e-05	0.000146515	2.37824
ENSMUSG00000003206	0.962413	3.54233	5.18996	1.19981e-05	0.000148152	2.6953
ENSMUSG00000079457	1.00045	4.16229	5.1894	1.20173e-05	0.000148281	2.51953
ENSMUSG00000028382	-0.421997	8.95272	-5.18898	1.20321e-05	0.000148356	2.43193
ENSMUSG00000022553	0.431986	6.95384	5.18725	1.20922e-05	0.000148987	2.35687
ENSMUSG00000034659	0.669079	4.94138	5.18282	1.2248e-05	0.000150797	2.46954
ENSMUSG00000038058	0.758385	6.21688	5.18234	1.22651e-05	0.000150899	2.34568
ENSMUSG00000016200	-2.04957	-1.02609	-5.18087	1.23172e-05	0.000151429	3.06193
ENSMUSG00000022433	0.563738	5.34946	5.1797	1.23588e-05	0.00015183	2.37623
ENSMUSG00000085028	-0.964112	4.57359	-5.17894	1.23859e-05	0.000152053	2.48265
ENSMUSG00000029710	2.40703	0.06956	5.17645	1.24753e-05	0.00015304	3.10222
ENSMUSG00000039886	0.74579	3.24186	5.17381	1.25707e-05	0.000154098	2.75435
ENSMUSG00000069270	1.33086	1.82646	5.17226	1.26272e-05	0.000154679	2.8417
ENSMUSG00000028005	1.41876	0.619129	5.16934	1.2734e-05	0.000155839	3.17759
ENSMUSG00000054626	-1.52743	0.568127	-5.169	1.27464e-05	0.000155839	3.0617
ENSMUSG00000097589	-1.10527	3.3169	-5.16892	1.27496e-05	0.000155839	2.60981
ENSMUSG00000037347	1.73965	0.873855	5.16786	1.27886e-05	0.000156154	3.03682
ENSMUSG00000026141	-2.44555	-1.64747	-5.16747	1.28028e-05	0.000156154	3.21183
ENSMUSG00000032388	0.450502	5.5985	5.16725	1.28112e-05	0.000156154	2.33639
ENSMUSG00000097731	-2.79193	-1.92978	-5.16722	1.28122e-05	0.000156154	3.21062
ENSMUSG00000024370	-0.369903	5.76015	-5.16457	1.29107e-05	0.000157241	2.29386
ENSMUSG00000097254	-0.836455	1.73488	-5.16249	1.29884e-05	0.000157989	2.97796
ENSMUSG00000014837	-0.553166	2.5994	-5.16221	1.29988e-05	0.000157989	2.79425
ENSMUSG00000033760	-0.561938	5.23646	-5.16218	1.30001e-05	0.000157989	2.34154
ENSMUSG00000040812	-0.798936	2.99397	-5.16099	1.30445e-05	0.000158396	2.61345
ENSMUSG00000044708	-1.06877	5.15482	-5.16079	1.30523e-05	0.000158396	2.33764
ENSMUSG00000033126	-0.682679	2.44179	-5.16023	1.30734e-05	0.000158465	2.79412
ENSMUSG00000025272	2.94473	-3.21241	5.15993	1.30845e-05	0.000158465	3.0297
ENSMUSG00000053559	0.787123	3.53217	5.15989	1.30861e-05	0.000158465	2.65958
ENSMUSG00000056476	1.07926	1.85698	5.1585	1.31388e-05	0.00015899	2.9281
ENSMUSG00000097321	-1.25241	0.230059	-5.15709	1.31924e-05	0.000159524	3.15657
ENSMUSG00000024194	0.539621	4.45131	5.15585	1.32398e-05	0.000159984	2.42861
ENSMUSG00000022235	-1.14618	1.81671	-5.15375	1.332e-05	0.000160675	2.82805
ENSMUSG00000090137	0.469781	9.29039	5.15362	1.33252e-05	0.000160675	2.33657
ENSMUSG00000023973	0.630941	6.03866	5.15361	1.33255e-05	0.000160675	2.26714
ENSMUSG00000016946	0.436861	4.59668	5.15144	1.34092e-05	0.000161569	2.40496
ENSMUSG00000040026	4.4803	-1.70912	5.1506	1.3442e-05	0.000161849	3.15947
ENSMUSG00000090262	0.461079	4.25193	5.14965	1.34788e-05	0.000162177	2.45085
ENSMUSG00000018882	0.380334	4.67538	5.14924	1.34949e-05	0.000162255	2.38616
ENSMUSG00000028943	1.04666	2.30601	5.14863	1.35187e-05	0.000162426	2.7577
ENSMUSG00000078787	1.97285	-0.492131	5.14637	1.36071e-05	0.000163372	3.16963
ENSMUSG00000060538	0.547356	4.29659	5.14558	1.36381e-05	0.000163628	2.44456
ENSMUSG00000042650	0.332436	7.22318	5.14262	1.37551e-05	0.000164916	2.2341
ENSMUSG00000029614	0.336289	10.0576	5.13907	1.38967e-05	0.000166494	2.33185
ENSMUSG00000029373	1.81739	2.60885	5.13778	1.39488e-05	0.000166929	2.68646
ENSMUSG00000020271	0.325589	5.92571	5.13768	1.39526e-05	0.000166929	2.22249
ENSMUSG00000040722	-0.958461	1.8731	-5.13588	1.40253e-05	0.00016768	2.82195
ENSMUSG00000028522	-0.418976	7.23405	-5.13414	1.40961e-05	0.000168407	2.21708
ENSMUSG00000041189	0.786493	3.50504	5.13367	1.41152e-05	0.000168516	2.46627
ENSMUSG00000057137	-0.679299	3.92686	-5.133	1.41426e-05	0.000168645	2.45358
ENSMUSG00000053253	0.473544	5.20823	5.13291	1.41459e-05	0.000168645	2.27409
ENSMUSG00000021660	0.262174	7.73724	5.13112	1.42194e-05	0.000169364	2.21886
ENSMUSG00000045503	0.630424	5.25818	5.13095	1.42262e-05	0.000169364	2.28378
ENSMUSG00000040323	1.03044	4.48073	5.12935	1.4292e-05	0.000169967	2.40259
ENSMUSG00000040310	-1.7645	-0.602334	-5.12923	1.42969e-05	0.000169967	3.09135
ENSMUSG00000022407	0.309577	5.57719	5.12888	1.43115e-05	0.000170021	2.21421
ENSMUSG00000004285	0.531023	5.72479	5.1285	1.43274e-05	0.00017009	2.21275
ENSMUSG00000078317	0.874311	2.89303	5.12785	1.43542e-05	0.000170237	2.68809
ENSMUSG00000038417	0.327242	5.58045	5.12771	1.43599e-05	0.000170237	2.20286
ENSMUSG00000084319	0.616327	9.10764	5.12528	1.44612e-05	0.000171274	2.2469
ENSMUSG00000097534	-0.972402	2.42985	-5.12512	1.44676e-05	0.000171274	2.78152
ENSMUSG00000037772	0.688984	3.99287	5.12346	1.45371e-05	0.000171977	2.45433
ENSMUSG00000025203	0.599693	6.77642	5.12134	1.46265e-05	0.000172914	2.16413
ENSMUSG00000003444	0.542674	3.02217	5.12073	1.46523e-05	0.000173097	2.61556
ENSMUSG00000068735	1.02938	7.42625	5.11753	1.4788e-05	0.000174497	2.16746
ENSMUSG00000000958	0.613849	4.59302	5.11746	1.47913e-05	0.000174497	2.21878
ENSMUSG00000033450	1.15475	6.56057	5.11574	1.48649e-05	0.000175243	2.15593
ENSMUSG00000050666	-1.3091	1.83321	-5.11495	1.48987e-05	0.000175518	2.79014
ENSMUSG00000040165	-1.0042	3.09411	-5.11427	1.49281e-05	0.000175742	2.48213
ENSMUSG00000004105	1.63495	2.05148	5.11126	1.50581e-05	0.00017715	2.92238
ENSMUSG00000022283	-0.710474	10.9243	-5.11034	1.50982e-05	0.000177498	2.31377
ENSMUSG00000037001	-0.817227	4.44565	-5.10872	1.51688e-05	0.000178204	2.26251
ENSMUSG00000002319	0.283276	5.3597	5.10847	1.51801e-05	0.000178214	2.16701
ENSMUSG00000007039	0.956442	2.09826	5.10726	1.5233e-05	0.000178621	2.71458
ENSMUSG00000044285	-1.97367	2.39394	-5.10702	1.52434e-05	0.000178621	2.55269
ENSMUSG00000022557	0.477706	5.79051	5.10695	1.52465e-05	0.000178621	2.14106
ENSMUSG00000038462	0.54187	6.29471	5.10493	1.53357e-05	0.000179542	2.11697
ENSMUSG00000001642	0.544175	6.56839	5.1036	1.53948e-05	0.00018011	2.11276
ENSMUSG00000096991	-1.57474	1.10921	-5.102	1.54659e-05	0.000180816	2.94333
ENSMUSG00000030337	-0.875947	6.14782	-5.10112	1.55055e-05	0.000181078	2.11494
ENSMUSG00000022604	-0.630586	5.1182	-5.10086	1.55172e-05	0.000181078	2.18206
ENSMUSG00000007655	2.7815	-0.743951	5.10079	1.55203e-05	0.000181078	3.04732
ENSMUSG00000000441	0.323849	7.09408	5.09986	1.55616e-05	0.000181434	2.10826
ENSMUSG00000070601	-1.50251	0.132918	-5.09922	1.55905e-05	0.000181646	3.02199
ENSMUSG00000033111	-0.53454	3.98836	-5.09706	1.56882e-05	0.000182659	2.3311
ENSMUSG00000027198	0.373183	5.39691	5.09657	1.57103e-05	0.00018279	2.13624
ENSMUSG00000085241	-0.589993	3.25217	-5.09575	1.57474e-05	0.000183096	2.42073
ENSMUSG00000026784	-0.759088	2.3978	-5.0946	1.57997e-05	0.000183578	2.62918
ENSMUSG00000078866	-0.613481	4.00475	-5.09216	1.59114e-05	0.000184749	2.33592
ENSMUSG00000022180	-0.883964	3.52724	-5.09188	1.59244e-05	0.000184773	2.39028
ENSMUSG00000037513	0.452597	5.85951	5.09142	1.59453e-05	0.000184889	2.08795
ENSMUSG00000031147	-3.00367	-3.29354	-5.08902	1.60561e-05	0.000186047	2.82577
ENSMUSG00000006378	1.0778	1.15713	5.08818	1.60954e-05	0.000186374	2.84687
ENSMUSG00000029777	0.344004	6.53189	5.0856	1.62157e-05	0.000187531	2.06053
ENSMUSG00000051497	-1.22869	3.25531	-5.08542	1.6224e-05	0.000187531	2.44351
ENSMUSG00000046096	-0.455152	4.53056	-5.08532	1.62285e-05	0.000187531	2.20642
ENSMUSG00000042608	0.486911	5.99292	5.08436	1.62735e-05	0.000187909	2.06772
ENSMUSG00000096488	1.94889	-0.444937	5.08415	1.62835e-05	0.000187909	3.00276
ENSMUSG00000048814	-1.067	0.0714143	-5.0837	1.63046e-05	0.000187943	2.90897
ENSMUSG00000032563	0.374487	5.36792	5.08362	1.63086e-05	0.000187943	2.10563
ENSMUSG00000085929	-2.53142	-1.69	-5.0803	1.64654e-05	0.000189621	2.9756
ENSMUSG00000030588	0.484654	4.10277	5.07985	1.64869e-05	0.000189739	2.28633
ENSMUSG00000097649	-1.62652	0.325721	-5.07818	1.65667e-05	0.000190528	2.82794
ENSMUSG00000019877	-0.67651	7.14697	-5.07759	1.65946e-05	0.00019072	2.057
ENSMUSG00000035545	-0.428509	8.44229	-5.07616	1.66632e-05	0.000191378	2.08885
ENSMUSG00000074030	-0.541946	4.884	-5.07569	1.66861e-05	0.000191408	2.1472
ENSMUSG00000042487	-0.411552	4.46986	-5.07564	1.66884e-05	0.000191408	2.16902
ENSMUSG00000035273	1.05242	5.1724	5.07376	1.67791e-05	0.000192318	2.11523
ENSMUSG00000004931	0.61943	4.01653	5.07352	1.67907e-05	0.00019232	2.30197
ENSMUSG00000028517	0.872361	4.08182	5.07192	1.68687e-05	0.000193083	2.21988
ENSMUSG00000027763	-0.472144	9.0518	-5.07124	1.69016e-05	0.000193329	2.09621
ENSMUSG00000022404	0.335116	4.74307	5.07083	1.69218e-05	0.00019343	2.16326
ENSMUSG00000033207	3.36771	-1.98277	5.07048	1.69385e-05	0.00019349	2.87262
ENSMUSG00000032691	0.994625	3.53164	5.06825	1.70478e-05	0.000194495	2.39388
ENSMUSG00000040102	-1.05948	4.86082	-5.06822	1.70495e-05	0.000194495	2.16494
ENSMUSG00000083563	-0.605276	4.29437	-5.06697	1.71113e-05	0.000195069	2.09789
ENSMUSG00000022103	-1.11442	4.38641	-5.06474	1.72213e-05	0.000196191	2.16538
ENSMUSG00000018372	-0.350028	4.67303	-5.06337	1.72899e-05	0.00019684	2.1089
ENSMUSG00000006215	0.527609	4.88663	5.06242	1.73374e-05	0.000197248	2.11779
ENSMUSG00000025925	-0.635197	4.47333	-5.06179	1.73686e-05	0.00019747	2.12606
ENSMUSG00000021704	-0.727451	4.41702	-5.0591	1.75041e-05	0.000198877	2.13988
ENSMUSG00000071226	-0.971271	5.20958	-5.05841	1.7539e-05	0.00019914	2.01925
ENSMUSG00000046841	0.796279	5.38835	5.05793	1.75632e-05	0.000199282	2.0467
ENSMUSG00000079402	1.94889	-0.434327	5.05677	1.76222e-05	0.000199816	2.92927
ENSMUSG00000020849	0.30977	7.73954	5.05618	1.76522e-05	0.000200023	2.00681
ENSMUSG00000018068	-0.495174	4.92708	-5.0558	1.76712e-05	0.000200105	2.05188
ENSMUSG00000005893	-0.571157	6.90122	-5.05478	1.77235e-05	0.000200386	1.97684
ENSMUSG00000028857	0.464832	4.87252	5.05455	1.77353e-05	0.000200386	2.07008
ENSMUSG00000063802	0.358196	4.34091	5.05443	1.77416e-05	0.000200386	2.17851
ENSMUSG00000040254	2.38262	-0.18249	5.05439	1.77434e-05	0.000200386	2.90639
ENSMUSG00000021840	-0.301907	6.95629	-5.05129	1.79029e-05	0.000202053	1.96961
ENSMUSG00000016493	-1.32626	1.06423	-5.05009	1.79651e-05	0.000202619	2.76883
ENSMUSG00000058174	0.932274	7.38905	5.04815	1.80657e-05	0.000203618	1.96266
ENSMUSG00000035513	0.815141	4.07326	5.0471	1.81208e-05	0.000204103	2.18689
ENSMUSG00000070315	-0.567603	3.96751	-5.04669	1.81419e-05	0.000204205	2.17951
ENSMUSG00000034472	-0.923215	0.986942	-5.04645	1.81548e-05	0.000204214	2.64921
ENSMUSG00000021256	2.89119	-2.74851	5.0461	1.81728e-05	0.000204281	2.76009
ENSMUSG00000005501	-0.743843	3.78557	-5.04379	1.82946e-05	0.000205513	2.25226
ENSMUSG00000034220	0.716727	4.1771	5.04121	1.84312e-05	0.000206911	2.11918
ENSMUSG00000035278	0.510758	5.17741	5.04092	1.84467e-05	0.000206948	2.00993
ENSMUSG00000079559	-1.48267	0.116006	-5.04044	1.84721e-05	0.000207011	2.84569
ENSMUSG00000020277	0.418653	5.85088	5.04035	1.84768e-05	0.000207011	1.94761
ENSMUSG00000051314	-1.09938	2.96947	-5.03916	1.85407e-05	0.00020759	2.51506
ENSMUSG00000066800	-1.1276	6.45381	-5.03641	1.86878e-05	0.000209099	1.9305
ENSMUSG00000023043	3.74267	0.460448	5.03576	1.87234e-05	0.000209358	2.77578
ENSMUSG00000031636	2.38881	-1.59956	5.0336	1.88401e-05	0.000210524	2.81984
ENSMUSG00000072589	-2.0094	0.780918	-5.03133	1.89639e-05	0.000211768	2.39792
ENSMUSG00000054871	1.6909	-0.582667	5.02929	1.90758e-05	0.000212877	2.85527
ENSMUSG00000033910	1.28429	1.05975	5.02655	1.92273e-05	0.000214301	2.65712
ENSMUSG00000028757	0.412021	6.74157	5.02652	1.92288e-05	0.000214301	1.89297
ENSMUSG00000029622	0.507909	8.37424	5.02329	1.94091e-05	0.000216169	1.92578
ENSMUSG00000072809	-0.945403	0.956272	-5.02169	1.94986e-05	0.000217023	2.66029
ENSMUSG00000039656	0.53241	6.14423	5.02048	1.95667e-05	0.000217638	1.88238
ENSMUSG00000011256	0.634933	7.16057	5.01942	1.96265e-05	0.00021816	1.88004
ENSMUSG00000044456	0.688534	7.74152	5.01793	1.97112e-05	0.000218958	1.89568
ENSMUSG00000038836	-0.748391	2.3873	-5.01728	1.97483e-05	0.000219226	2.38058
ENSMUSG00000045294	0.585811	5.03209	5.01687	1.97715e-05	0.000219339	1.96581
ENSMUSG00000078879	-1.10075	2.4135	-5.01563	1.98422e-05	0.000219979	2.41056
ENSMUSG00000019970	0.744877	5.58839	5.01482	1.98888e-05	0.000220352	1.89755
ENSMUSG00000056124	1.12026	3.60785	5.01433	1.99172e-05	0.000220522	2.102
ENSMUSG00000036285	0.397995	4.83091	5.01379	1.9948e-05	0.000220718	1.98043
ENSMUSG00000062590	-0.859899	4.0005	-5.01346	1.99668e-05	0.000220755	2.05406
ENSMUSG00000032508	0.489626	5.81951	5.01328	1.99773e-05	0.000220755	1.8793
ENSMUSG00000026918	-0.257055	6.22774	-5.01298	1.99949e-05	0.000220778	1.85103
ENSMUSG00000023919	-0.613306	4.67939	-5.01279	2.00055e-05	0.000220778	1.93955
ENSMUSG00000022974	-0.413281	6.05151	-5.01218	2.00409e-05	0.000221024	1.84958
ENSMUSG00000001729	0.308139	7.1647	5.00852	2.02535e-05	0.000223224	1.84761
ENSMUSG00000027959	-0.996845	4.1442	-5.00652	2.03703e-05	0.000224365	1.99022
ENSMUSG00000041645	0.273238	6.96598	5.00289	2.05852e-05	0.000226585	1.8295
ENSMUSG00000029913	1.98659	-1.2874	5.00237	2.06157e-05	0.000226772	2.78101
ENSMUSG00000004127	-0.519866	3.44225	-5.00113	2.06898e-05	0.000227382	2.11733
ENSMUSG00000074865	-1.6087	0.679157	-5.00099	2.06979e-05	0.000227382	2.63688
ENSMUSG00000002845	0.383802	4.38818	4.99727	2.09214e-05	0.000229688	1.99958
ENSMUSG00000034832	-0.546272	7.03847	-4.99665	2.09585e-05	0.000229946	1.81038
ENSMUSG00000027506	0.47186	6.6686	4.9951	2.10527e-05	0.00023083	1.80173
ENSMUSG00000061119	0.312518	6.43884	4.99471	2.10764e-05	0.00023094	1.79875
ENSMUSG00000067736	-0.485187	6.99172	-4.99356	2.11462e-05	0.000231405	1.80972
ENSMUSG00000065947	-0.485187	6.99172	-4.99356	2.11462e-05	0.000231405	1.80972
ENSMUSG00000005447	0.837146	4.67356	4.99319	2.11689e-05	0.000231504	1.9469
ENSMUSG00000069792	1.59002	3.09556	4.99091	2.13084e-05	0.00023288	2.27276
ENSMUSG00000052632	-0.67825	3.96879	-4.99021	2.13518e-05	0.000233203	1.99078
ENSMUSG00000028906	-1.812	9.1503	-4.98907	2.14218e-05	0.000233816	1.91356
ENSMUSG00000048148	2.54161	-0.262286	4.98859	2.14514e-05	0.000233989	2.66941
ENSMUSG00000050390	0.822298	1.2188	4.98818	2.14766e-05	0.000234113	2.51988
ENSMUSG00000042312	0.633666	3.71393	4.98545	2.16462e-05	0.00023581	2.11755
ENSMUSG00000040850	-0.692208	6.96553	-4.98444	2.17096e-05	0.000236349	1.78447
ENSMUSG00000023972	1.67149	-1.47866	4.98353	2.17667e-05	0.000236818	2.72523
ENSMUSG00000090231	1.02638	3.53742	4.98192	2.18679e-05	0.000237765	2.07783
ENSMUSG00000022507	-0.478151	5.72007	-4.98148	2.18955e-05	0.000237765	1.78108
ENSMUSG00000020078	-0.35463	5.91428	-4.98148	2.18959e-05	0.000237765	1.76594
ENSMUSG00000056501	2.15364	2.90979	4.98042	2.19629e-05	0.000238339	2.31825
ENSMUSG00000047126	-0.694859	8.59317	-4.97403	2.23709e-05	0.000242611	1.80702
ENSMUSG00000028447	0.502423	4.44539	4.97337	2.24137e-05	0.00024292	1.91654
ENSMUSG00000036835	0.453743	5.33879	4.973	2.24377e-05	0.000243024	1.79778
ENSMUSG00000033307	0.487121	5.04461	4.97221	2.24885e-05	0.000243419	1.84857
ENSMUSG00000000740	0.465408	10.255	4.97119	2.25549e-05	0.000243982	1.85788
ENSMUSG00000061455	-0.451219	5.5523	-4.97017	2.26212e-05	0.000244543	1.75296
ENSMUSG00000024974	-0.444791	7.11089	-4.96928	2.26794e-05	0.000245016	1.74178
ENSMUSG00000040003	-1.14114	0.5399	-4.96305	2.30903e-05	0.000249234	2.53489
ENSMUSG00000025862	-0.433797	7.87622	-4.96292	2.30993e-05	0.000249234	1.74743
ENSMUSG00000061013	-1.36991	-0.967425	-4.96117	2.3216e-05	0.000250333	2.64818
ENSMUSG00000038179	-0.842888	3.88319	-4.96084	2.32377e-05	0.000250408	2.06429
ENSMUSG00000025880	1.11684	5.47794	4.95933	2.33396e-05	0.000251346	1.789
ENSMUSG00000063415	3.41844	-2.87141	4.95886	2.33712e-05	0.000251526	2.5695
ENSMUSG00000087095	-1.77433	-0.857496	-4.95839	2.34025e-05	0.000251704	2.65049
ENSMUSG00000097746	1.13961	-0.0801814	4.95642	2.35359e-05	0.000252977	2.62525
ENSMUSG00000078439	0.7038	2.34061	4.95588	2.35724e-05	0.000253164	2.2573
ENSMUSG00000061838	0.504865	5.53709	4.95572	2.35832e-05	0.000253164	1.71841
ENSMUSG00000030452	-0.348967	5.45123	-4.95478	2.36475e-05	0.000253693	1.72178
ENSMUSG00000058600	0.603734	9.01737	4.95368	2.37226e-05	0.000254338	1.75416
ENSMUSG00000097204	-0.885452	1.22129	-4.95319	2.37564e-05	0.000254539	2.43313
ENSMUSG00000097176	-1.99107	-1.59654	-4.95267	2.37917e-05	0.000254756	2.64042
ENSMUSG00000027669	-0.547484	3.42976	-4.95028	2.39561e-05	0.000256306	1.94073
ENSMUSG00000032300	0.424603	6.07553	4.95001	2.3975e-05	0.000256306	1.67606
ENSMUSG00000048960	-1.21983	0.850595	-4.94991	2.39819e-05	0.000256306	2.429
ENSMUSG00000098332	-0.975485	1.71515	-4.94934	2.40208e-05	0.00025656	2.35602
ENSMUSG00000024038	0.366246	4.84056	4.94816	2.4103e-05	0.000257276	1.78558
ENSMUSG00000026753	-0.340897	6.0599	-4.94777	2.41298e-05	0.0002574	1.6654
ENSMUSG00000045382	1.01442	7.62415	4.9446	2.43513e-05	0.000259599	1.67175
ENSMUSG00000036292	-0.714433	2.23025	-4.94288	2.44724e-05	0.000260726	2.21513
ENSMUSG00000030060	0.62565	4.61817	4.94239	2.45074e-05	0.000260916	1.83264
ENSMUSG00000025326	-0.545571	6.11211	-4.94219	2.45211e-05	0.000260916	1.65161
ENSMUSG00000028848	0.552309	3.67524	4.94142	2.45755e-05	0.00026133	1.99437
ENSMUSG00000041959	0.857028	6.38551	4.9411	2.45983e-05	0.000261409	1.65517
ENSMUSG00000042262	2.4771	-0.752826	4.94048	2.46425e-05	0.000261714	2.59182
ENSMUSG00000013858	0.385795	6.78716	4.93974	2.4695e-05	0.000262107	1.64445
ENSMUSG00000050373	-0.504231	3.35638	-4.93718	2.4878e-05	0.000263885	1.98652
ENSMUSG00000022175	0.455558	7.81805	4.93464	2.50602e-05	0.000265545	1.65456
ENSMUSG00000041117	1.33928	0.481646	4.93452	2.50691e-05	0.000265545	2.51062
ENSMUSG00000021794	0.427856	7.45531	4.93435	2.50816e-05	0.000265545	1.64349
ENSMUSG00000044468	-2.02076	8.5576	-4.92701	2.56179e-05	0.000271053	1.71871
ENSMUSG00000037656	0.528798	4.7089	4.92567	2.57166e-05	0.000271871	1.69786
ENSMUSG00000037234	-0.589569	6.01333	-4.92548	2.57308e-05	0.000271871	1.60677
ENSMUSG00000097825	-1.23124	-0.312665	-4.92531	2.57434e-05	0.000271871	2.49059
ENSMUSG00000046658	0.481583	3.60822	4.92468	2.57901e-05	0.000272195	1.91475
ENSMUSG00000032554	-0.97873	7.08881	-4.92394	2.58451e-05	0.000272606	1.60779
ENSMUSG00000016256	0.597036	7.52333	4.92244	2.59567e-05	0.000273315	1.61222
ENSMUSG00000005354	0.428833	6.3473	4.92242	2.59582e-05	0.000273315	1.59292
ENSMUSG00000029364	0.384174	5.3402	4.9223	2.59678e-05	0.000273315	1.64574
ENSMUSG00000031672	0.334887	6.73941	4.92217	2.5977e-05	0.000273315	1.59441
ENSMUSG00000031358	-0.307177	5.09031	-4.92194	2.59942e-05	0.000273326	1.6635
ENSMUSG00000022010	0.634707	5.77037	4.92021	2.61246e-05	0.000274527	1.5953
ENSMUSG00000094649	0.937239	2.04797	4.91912	2.62065e-05	0.000275217	2.1728
ENSMUSG00000024387	0.366664	6.18859	4.9187	2.62382e-05	0.00027538	1.5837
ENSMUSG00000082806	3.35786	-2.845	4.91542	2.64875e-05	0.000277823	2.42019
ENSMUSG00000097563	-1.80083	-1.22094	-4.91038	2.68751e-05	0.000281714	2.53792
ENSMUSG00000009863	0.346784	5.97626	4.90948	2.69441e-05	0.000282227	1.55949
ENSMUSG00000097120	2.32796	-2.63687	4.90931	2.69573e-05	0.000282227	2.38363
ENSMUSG00000059975	-0.672653	3.4149	-4.90835	2.70326e-05	0.00028284	1.93901
ENSMUSG00000025597	1.17347	0.637473	4.90812	2.70499e-05	0.000282846	2.40659
ENSMUSG00000033499	-0.558406	6.53017	-4.90665	2.71649e-05	0.000283873	1.54894
ENSMUSG00000006442	0.577794	4.74974	4.90628	2.71938e-05	0.000284	1.67151
ENSMUSG00000020737	0.445063	7.11475	4.9054	2.72626e-05	0.000284543	1.55186
ENSMUSG00000032064	-1.71636	-1.25063	-4.90443	2.73392e-05	0.000285167	2.50954
ENSMUSG00000031778	1.72813	-0.8045	4.90337	2.74229e-05	0.000285864	2.49081
ENSMUSG00000034022	0.457352	7.01875	4.90288	2.74615e-05	0.000286089	1.54468
ENSMUSG00000021185	0.849163	3.66324	4.90166	2.75586e-05	0.000286924	1.90714
ENSMUSG00000078789	0.582236	4.00134	4.90141	2.75778e-05	0.000286948	1.8265
ENSMUSG00000056919	-0.496542	5.03693	-4.90034	2.76634e-05	0.000287662	1.56493
ENSMUSG00000095642	1.43977	4.72463	4.89989	2.76995e-05	0.00028786	1.62332
ENSMUSG00000020659	-0.580696	4.85252	-4.89859	2.78027e-05	0.000288756	1.63827
ENSMUSG00000048163	0.624296	7.86381	4.89778	2.78679e-05	0.000289175	1.55076
ENSMUSG00000058569	0.302197	6.17144	4.89766	2.78772e-05	0.000289175	1.5245
ENSMUSG00000039130	0.298097	4.50203	4.8958	2.80272e-05	0.000290553	1.68093
ENSMUSG00000023191	1.28754	0.183356	4.894	2.81731e-05	0.000291886	2.39465
ENSMUSG00000097032	-0.758899	0.974271	-4.89285	2.82666e-05	0.000292676	2.25842
ENSMUSG00000045404	-1.02346	1.39057	-4.89176	2.83552e-05	0.000293414	2.31311
ENSMUSG00000078495	-0.968825	4.60218	-4.89059	2.84509e-05	0.000294114	1.69555
ENSMUSG00000032407	-0.465723	6.78323	-4.89051	2.84576e-05	0.000294114	1.50814
ENSMUSG00000037129	2.92419	0.25612	4.88993	2.85048e-05	0.000294422	2.48234
ENSMUSG00000048058	0.963038	3.51494	4.88843	2.86284e-05	0.000295519	1.87134
ENSMUSG00000087088	-1.13316	0.0693125	-4.88758	2.86985e-05	0.000296061	2.41765
ENSMUSG00000029063	0.493725	7.03089	4.88721	2.87293e-05	0.000296152	1.49886
ENSMUSG00000040385	0.304242	8.32322	4.88705	2.87423e-05	0.000296152	1.53841
ENSMUSG00000021041	0.85494	1.91321	4.88577	2.88489e-05	0.00029707	2.14878
ENSMUSG00000055435	-0.562481	5.23126	-4.88442	2.8961e-05	0.000298043	1.5737
ENSMUSG00000022905	-0.426707	6.43539	-4.88415	2.89832e-05	0.00029809	1.48295
ENSMUSG00000063146	0.66869	4.54071	4.88385	2.90087e-05	0.000298171	1.64095
ENSMUSG00000051444	-0.595786	2.41922	-4.88286	2.90916e-05	0.000298842	1.98491
ENSMUSG00000075054	-0.645273	3.43878	-4.88219	2.91472e-05	0.000299232	1.84126
ENSMUSG00000029860	0.727185	7.37885	4.88117	2.92332e-05	0.00029985	1.48841
ENSMUSG00000085286	-1.64176	-1.2015	-4.88105	2.92437e-05	0.00029985	2.45967
ENSMUSG00000021018	0.449314	3.62344	4.88085	2.92606e-05	0.00029985	1.82482
ENSMUSG00000015363	0.52502	6.34725	4.87702	2.95843e-05	0.000302826	1.46597
ENSMUSG00000050270	-0.672602	1.00702	-4.87679	2.9604e-05	0.000302826	2.25345
ENSMUSG00000028488	-1.55211	-1.11901	-4.87668	2.96138e-05	0.000302826	2.4368
ENSMUSG00000097635	-2.86758	-1.81662	-4.87647	2.9632e-05	0.000302826	2.40479
ENSMUSG00000029131	-0.437339	6.99451	-4.87637	2.96404e-05	0.000302826	1.47593
ENSMUSG00000052920	2.9016	-2.92383	4.87462	2.97902e-05	0.000304172	2.3916
ENSMUSG00000028567	0.426975	4.41731	4.87396	2.98464e-05	0.000304562	1.64518
ENSMUSG00000031807	0.545863	5.74082	4.8736	2.98777e-05	0.000304699	1.48525
ENSMUSG00000031320	0.475007	10.3085	4.87324	2.99081e-05	0.000304825	1.57894
ENSMUSG00000057777	2.85827	-3.08427	4.87188	3.00259e-05	0.000305762	2.31331
ENSMUSG00000006423	-0.322419	5.50911	-4.87176	3.00362e-05	0.000305762	1.47083
ENSMUSG00000009894	0.687178	3.02313	4.86862	3.03092e-05	0.000308356	1.93784
ENSMUSG00000078202	-0.669561	3.11062	-4.86763	3.03951e-05	0.000309044	1.7675
ENSMUSG00000051413	-0.453244	6.24226	-4.86732	3.04226e-05	0.000309138	1.43445
ENSMUSG00000027259	-0.395534	4.06305	-4.86618	3.05227e-05	0.000309945	1.62823
ENSMUSG00000059325	1.04618	4.16992	4.866	3.05386e-05	0.000309945	1.74275
ENSMUSG00000091803	0.517369	3.9238	4.86313	3.0792e-05	0.000312329	1.69934
ENSMUSG00000045231	-1.43496	2.09987	-4.86203	3.08897e-05	0.000313133	2.07082
ENSMUSG00000038766	-0.400423	8.20169	-4.86129	3.09555e-05	0.000313612	1.4643
ENSMUSG00000047260	0.40183	4.88564	4.85977	3.10913e-05	0.000314799	1.53021
ENSMUSG00000001542	-0.935551	6.14288	-4.8568	3.13579e-05	0.000317308	1.41139
ENSMUSG00000058281	-2.17407	-1.48316	-4.85618	3.14138e-05	0.000317685	2.39356
ENSMUSG00000032399	0.3624	10.6462	4.85498	3.15227e-05	0.000318595	1.54767
ENSMUSG00000056763	-0.435306	4.63627	-4.85274	3.17262e-05	0.000320368	1.51769
ENSMUSG00000009647	0.421144	4.51453	4.85264	3.17359e-05	0.000320368	1.52505
ENSMUSG00000022836	0.871993	2.02915	4.85123	3.18644e-05	0.000321474	2.01315
ENSMUSG00000090386	-1.71775	-0.783755	-4.84892	3.20771e-05	0.000323427	2.36342
ENSMUSG00000025809	0.452614	8.19165	4.84853	3.21133e-05	0.000323462	1.4349
ENSMUSG00000020491	-0.506377	4.03068	-4.84847	3.21188e-05	0.000323462	1.56919
ENSMUSG00000063800	-0.34819	5.04193	-4.84802	3.21604e-05	0.000323514	1.44158
ENSMUSG00000030386	-0.855838	3.65164	-4.848	3.21622e-05	0.000323514	1.71363
ENSMUSG00000000552	0.611986	5.48914	4.84736	3.22212e-05	0.000323915	1.4058
ENSMUSG00000029863	-0.311877	6.44677	-4.84514	3.24282e-05	0.000325802	1.37056
ENSMUSG00000084372	-1.5507	0.224253	-4.84302	3.26262e-05	0.000327444	2.13468
ENSMUSG00000021929	-0.491914	5.91466	-4.84294	3.2634e-05	0.000327444	1.36958
ENSMUSG00000020380	-0.322556	5.87357	-4.84277	3.26497e-05	0.000327444	1.3705
ENSMUSG00000021806	-1.19942	1.59495	-4.84204	3.27187e-05	0.000327943	2.03757
ENSMUSG00000028165	-0.299648	5.75894	-4.83742	3.31569e-05	0.000331978	1.36155
ENSMUSG00000052563	-0.892981	2.77455	-4.83738	3.31605e-05	0.000331978	1.7457
ENSMUSG00000050310	-0.655972	6.55361	-4.83367	3.35164e-05	0.000335343	1.33995
ENSMUSG00000060152	0.462183	4.24855	4.83328	3.3554e-05	0.00033552	1.58679
ENSMUSG00000082568	-0.925588	3.25558	-4.83261	3.36183e-05	0.000335965	1.69347
ENSMUSG00000013353	-1.45312	-1.41258	-4.83075	3.37986e-05	0.000337567	2.31901
ENSMUSG00000074457	2.51102	-2.61914	4.8288	3.39893e-05	0.000339271	2.26043
ENSMUSG00000038225	-0.459013	4.87947	-4.82783	3.4084e-05	0.000340017	1.41512
ENSMUSG00000035566	3.9072	-1.27841	4.82699	3.41665e-05	0.000340639	2.27447
ENSMUSG00000043088	2.81353	-2.36098	4.82624	3.42401e-05	0.000341171	2.23627
ENSMUSG00000024081	0.37148	6.59555	4.82531	3.4332e-05	0.000341886	1.31603
ENSMUSG00000022378	0.538092	7.50388	4.82395	3.44666e-05	0.000343025	1.33244
ENSMUSG00000055322	0.996835	5.47322	4.82337	3.45243e-05	0.000343397	1.32692
ENSMUSG00000035268	0.478203	6.37606	4.8217	3.46903e-05	0.000344846	1.30651
ENSMUSG00000026209	0.379354	4.82823	4.82044	3.48161e-05	0.000345691	1.42525
ENSMUSG00000002393	0.822079	3.00227	4.82044	3.48161e-05	0.000345691	1.75774
ENSMUSG00000004667	0.459	5.77289	4.81876	3.49854e-05	0.000347168	1.31766
ENSMUSG00000045128	0.525376	9.43871	4.8174	3.51223e-05	0.000348312	1.3784
ENSMUSG00000027778	-0.787852	5.71067	-4.81703	3.516e-05	0.000348312	1.30369
ENSMUSG00000049191	1.02702	3.00009	4.817	3.51624e-05	0.000348312	1.76618
ENSMUSG00000001416	0.33507	7.15835	4.81664	3.51993e-05	0.000348473	1.30122
ENSMUSG00000068394	-0.51634	4.69564	-4.81572	3.52922e-05	0.000349189	1.38421
ENSMUSG00000060224	-0.753969	1.46441	-4.81467	3.53996e-05	0.000350047	1.97901
ENSMUSG00000020311	-0.493654	5.07823	-4.81442	3.54245e-05	0.000350088	1.35057
ENSMUSG00000087298	-0.691036	2.58175	-4.81323	3.55457e-05	0.000351081	1.80299
ENSMUSG00000095186	-3.51038	-2.13937	-4.81237	3.56346e-05	0.000351754	2.27766
ENSMUSG00000038696	0.260088	5.54164	4.81193	3.5679e-05	0.000351987	1.30777
ENSMUSG00000078877	-1.01445	1.92714	-4.81121	3.57536e-05	0.000352518	1.94618
ENSMUSG00000042379	3.092	-0.54982	4.80936	3.59439e-05	0.000354187	2.26966
ENSMUSG00000021877	0.311585	6.70072	4.80884	3.59979e-05	0.000354513	1.27086
ENSMUSG00000073838	0.304134	5.87479	4.80788	3.60974e-05	0.000355286	1.2809
ENSMUSG00000062931	-0.833614	2.52322	-4.80767	3.61186e-05	0.000355289	1.79976
ENSMUSG00000027831	-0.923218	1.45586	-4.80733	3.61544e-05	0.000355435	1.99745
ENSMUSG00000078435	-1.33502	1.08562	-4.80642	3.6249e-05	0.000356158	2.06921
ENSMUSG00000031129	-0.590475	4.34663	-4.80621	3.62711e-05	0.000356168	1.54039
ENSMUSG00000061315	0.293047	8.49298	4.80539	3.63569e-05	0.000356803	1.3121
ENSMUSG00000035834	-0.540825	3.41885	-4.805	3.63973e-05	0.000356925	1.61506
ENSMUSG00000033054	-0.572031	5.24088	-4.80468	3.64314e-05	0.000356925	1.30015
ENSMUSG00000024213	0.422992	5.97503	4.80467	3.64325e-05	0.000356925	1.26562
ENSMUSG00000097347	-0.759875	6.29473	-4.80382	3.65212e-05	0.000357485	1.25651
ENSMUSG00000003226	-0.5735	8.02519	-4.80372	3.6532e-05	0.000357485	1.29514
ENSMUSG00000022124	-0.349911	6.43527	-4.80137	3.67798e-05	0.000359644	1.24621
ENSMUSG00000036053	-0.76073	3.80181	-4.80122	3.6795e-05	0.000359644	1.51545
ENSMUSG00000056952	0.386784	6.61333	4.80008	3.69165e-05	0.000360623	1.24396
ENSMUSG00000059475	-0.287926	4.89073	-4.79561	3.73937e-05	0.000364821	1.33435
ENSMUSG00000024049	1.42703	1.24358	4.79556	3.73992e-05	0.000364821	2.06758
ENSMUSG00000037089	0.456246	4.87469	4.79545	3.74109e-05	0.000364821	1.34701
ENSMUSG00000045165	-0.773357	6.26602	-4.79346	3.7626e-05	0.000366708	1.24616
ENSMUSG00000027954	2.64885	-0.627364	4.79318	3.76558e-05	0.000366787	2.22695
ENSMUSG00000049686	0.69222	4.24084	4.79123	3.78677e-05	0.000368639	1.48344
ENSMUSG00000075014	-3.59281	0.567152	-4.7901	3.79908e-05	0.00036943	2.12241
ENSMUSG00000049164	-0.725017	5.40565	-4.79008	3.79927e-05	0.00036943	1.26474
ENSMUSG00000082588	-0.843281	2.77345	-4.78981	3.80225e-05	0.000369508	1.67328
ENSMUSG00000044339	0.779715	2.87969	4.78912	3.80978e-05	0.000370027	1.63461
ENSMUSG00000028480	0.660064	5.73991	4.78817	3.82027e-05	0.000370721	1.25881
ENSMUSG00000029545	0.451449	4.45843	4.78807	3.8213e-05	0.000370721	1.40187
ENSMUSG00000074643	0.529172	6.01826	4.78728	3.83001e-05	0.000371353	1.23801
ENSMUSG00000029121	1.16707	1.71436	4.78581	3.84622e-05	0.00037253	1.91555
ENSMUSG00000094626	-1.15635	-0.314992	-4.78578	3.84655e-05	0.00037253	2.1556
ENSMUSG00000029781	1.39529	1.32139	4.78509	3.85424e-05	0.000372898	1.93208
ENSMUSG00000050936	-1.23005	-0.551814	-4.78493	3.85599e-05	0.000372898	1.92891
ENSMUSG00000028359	3.17307	-2.74725	4.78484	3.85696e-05	0.000372898	2.0744
ENSMUSG00000056735	-1.01614	2.33764	-4.7814	3.89526e-05	0.000376387	1.79354
ENSMUSG00000046593	3.33437	-2.51017	4.78087	3.90126e-05	0.000376751	2.14843
ENSMUSG00000031333	-0.596567	5.97502	-4.77904	3.92177e-05	0.00037817	1.18693
ENSMUSG00000022437	0.306615	6.26722	4.77899	3.92237e-05	0.00037817	1.18316
ENSMUSG00000018666	-0.340039	6.23075	-4.77897	3.92265e-05	0.00037817	1.18266
ENSMUSG00000044703	0.866962	2.73605	4.77877	3.92489e-05	0.00037817	1.68116
ENSMUSG00000040482	0.345245	4.68531	4.77511	3.96635e-05	0.000381947	1.27519
ENSMUSG00000074211	0.674031	3.7854	4.77432	3.97535e-05	0.000382597	1.49411
ENSMUSG00000030423	0.406769	3.9897	4.77366	3.98292e-05	0.000383107	1.42499
ENSMUSG00000058624	-2.08658	6.01389	-4.77332	3.98688e-05	0.00038327	1.19601
ENSMUSG00000054408	0.324984	7.10084	4.77263	3.99478e-05	0.000383812	1.18486
ENSMUSG00000026200	-0.537988	3.38013	-4.77012	4.02372e-05	0.000386373	1.48076
ENSMUSG00000031517	1.2739	0.956431	4.76803	4.04786e-05	0.000388471	1.84425
ENSMUSG00000003378	0.644534	2.78119	4.76781	4.05041e-05	0.000388495	1.62889
ENSMUSG00000031647	1.31079	0.718003	4.76692	4.06082e-05	0.000389273	2.03381
ENSMUSG00000030835	0.252888	6.37895	4.76533	4.07938e-05	0.000390831	1.14398
ENSMUSG00000057835	-0.921014	2.00083	-4.76502	4.08302e-05	0.000390958	1.76045
ENSMUSG00000056043	-1.32295	1.099	-4.76264	4.11104e-05	0.000393299	1.61145
ENSMUSG00000020954	-0.393066	5.66443	-4.76255	4.11211e-05	0.000393299	1.15262
ENSMUSG00000042129	0.608865	6.96338	4.76067	4.13445e-05	0.000395212	1.14142
ENSMUSG00000032481	-0.423916	6.58672	-4.75949	4.14844e-05	0.000396326	1.12991
ENSMUSG00000028159	0.413348	6.01227	4.75928	4.151e-05	0.000396334	1.14101
ENSMUSG00000020257	0.404362	7.27964	4.75909	4.15325e-05	0.000396334	1.14049
ENSMUSG00000028955	0.394334	5.96121	4.7589	4.15555e-05	0.000396334	1.13156
ENSMUSG00000059182	0.430399	5.49007	4.7585	4.16025e-05	0.000396559	1.17694
ENSMUSG00000058248	2.9115	-2.64789	4.75679	4.18075e-05	0.000398289	2.08307
ENSMUSG00000075576	-1.12347	0.570054	-4.75599	4.19041e-05	0.000398984	2.01038
ENSMUSG00000022556	0.581939	5.4512	4.7549	4.20354e-05	0.000400009	1.17088
ENSMUSG00000022280	-0.822225	5.93445	-4.75331	4.22285e-05	0.000401621	1.11362
ENSMUSG00000004070	0.378923	5.64726	4.75291	4.22764e-05	0.000401851	1.13819
ENSMUSG00000097879	-1.3821	1.98835	-4.75163	4.24326e-05	0.00040311	1.765
ENSMUSG00000041479	1.69194	-0.490367	4.74997	4.26352e-05	0.000404807	2.0845
ENSMUSG00000028134	-0.712856	4.1458	-4.74871	4.27895e-05	0.000406045	1.31397
ENSMUSG00000030554	1.9163	-1.35482	4.74787	4.28929e-05	0.000406798	2.09594
ENSMUSG00000048910	-2.00103	6.25898	-4.74754	4.29337e-05	0.000406948	1.11948
ENSMUSG00000041445	3.31564	-0.745113	4.74735	4.29568e-05	0.000406948	2.10569
ENSMUSG00000029507	0.336706	4.87961	4.74651	4.30612e-05	0.000407708	1.19992
ENSMUSG00000033965	1.76993	-0.591333	4.74467	4.32893e-05	0.000409639	2.08129
ENSMUSG00000055413	0.90724	6.87709	4.7436	4.34226e-05	0.000410671	1.08839
ENSMUSG00000025626	-0.43616	5.53101	-4.74306	4.34898e-05	0.000411077	1.11293
ENSMUSG00000021669	-0.337145	6.06203	-4.7426	4.35469e-05	0.000411387	1.08968
ENSMUSG00000034394	2.07908	-0.586326	4.74182	4.36448e-05	0.000412081	2.091
ENSMUSG00000030399	1.36613	-1.0468	4.74144	4.3693e-05	0.000412081	1.93258
ENSMUSG00000026749	0.769154	2.70991	4.74143	4.36934e-05	0.000412081	1.60881
ENSMUSG00000024235	0.684448	4.81212	4.74113	4.37322e-05	0.000412187	1.22209
ENSMUSG00000027519	-0.240526	5.97384	-4.74077	4.37772e-05	0.000412187	1.07966
ENSMUSG00000050989	0.750276	3.7717	4.74076	4.37777e-05	0.000412187	1.39769
ENSMUSG00000045039	0.648787	2.85093	4.73819	4.4103e-05	0.00041502	1.50217
ENSMUSG00000015533	-0.862273	3.18849	-4.7368	4.42788e-05	0.000416442	1.39002
ENSMUSG00000031813	0.493415	4.24267	4.7352	4.44827e-05	0.000418128	1.31677
ENSMUSG00000029510	-0.871032	2.05489	-4.73399	4.46374e-05	0.000419186	1.66336
ENSMUSG00000029344	0.695193	5.6677	4.73378	4.46652e-05	0.000419186	1.10536
ENSMUSG00000044258	0.929231	5.33951	4.73365	4.46808e-05	0.000419186	1.11788
ENSMUSG00000062949	-0.589402	5.82771	-4.73355	4.46943e-05	0.000419186	1.06405
ENSMUSG00000052557	-0.89776	2.68386	-4.73224	4.48631e-05	0.000420536	1.55644
ENSMUSG00000037493	0.821037	1.48225	4.73139	4.49718e-05	0.000421322	1.76781
ENSMUSG00000024927	0.499735	6.81822	4.73102	4.50202e-05	0.000421541	1.05002
ENSMUSG00000058558	0.555054	8.11912	4.72877	4.53125e-05	0.000424043	1.07674
ENSMUSG00000034300	0.31403	5.77797	4.72744	4.54853e-05	0.000425152	1.05674
ENSMUSG00000019996	-0.578384	4.43994	-4.72739	4.54919e-05	0.000425152	1.2067
ENSMUSG00000038845	0.31852	5.51922	4.72728	4.55063e-05	0.000425152	1.08322
ENSMUSG00000050147	1.26479	1.06876	4.72689	4.55573e-05	0.000425394	1.8935
ENSMUSG00000058546	0.399738	9.83892	4.7265	4.56086e-05	0.000425638	1.14326
ENSMUSG00000038806	-0.345201	5.63179	-4.72514	4.5787e-05	0.000427068	1.04136
ENSMUSG00000044702	-0.568948	3.3945	-4.72111	4.63201e-05	0.000431802	1.31412
ENSMUSG00000021124	0.398433	5.15229	4.71965	4.65143e-05	0.000433248	1.08776
ENSMUSG00000012405	0.652966	8.81811	4.71956	4.65263e-05	0.000433248	1.07921
ENSMUSG00000026278	2.18028	-2.31984	4.71722	4.68404e-05	0.00043588	2.01575
ENSMUSG00000053192	-0.961294	3.32355	-4.71707	4.68606e-05	0.00043588	1.41382
ENSMUSG00000041740	-1.27548	8.1617	-4.71671	4.6908e-05	0.000436082	1.08055
ENSMUSG00000030249	1.78389	-0.00847402	4.71517	4.71166e-05	0.000437781	1.96054
ENSMUSG00000018559	0.326576	6.26522	4.71445	4.72141e-05	0.000438446	1.00105
ENSMUSG00000062328	0.510852	9.96051	4.7131	4.73969e-05	0.000439902	1.11192
ENSMUSG00000025156	0.305754	5.75956	4.71242	4.74897e-05	0.000440522	1.01632
ENSMUSG00000028978	3.22692	-2.2041	4.71184	4.75685e-05	0.000441011	1.97923
ENSMUSG00000036966	0.471118	5.34829	4.71118	4.76591e-05	0.00044161	1.04561
ENSMUSG00000003178	-1.29063	3.38074	-4.70959	4.78772e-05	0.000443196	1.28201
ENSMUSG00000020069	-0.411079	5.60045	-4.70947	4.78943e-05	0.000443196	1.00659
ENSMUSG00000021282	-0.753254	8.55592	-4.70936	4.79088e-05	0.000443196	1.05616
ENSMUSG00000028433	-0.366698	6.34742	-4.70797	4.80998e-05	0.000444719	0.981434
ENSMUSG00000035325	0.40801	6.88327	4.70649	4.83047e-05	0.000446371	0.981371
ENSMUSG00000070425	-0.295181	5.29355	-4.70353	4.87179e-05	0.000449943	1.02465
ENSMUSG00000022971	-0.33027	6.17419	-4.7022	4.89042e-05	0.000451417	0.966048
ENSMUSG00000022185	-0.265912	8.43734	-4.70137	4.90195e-05	0.000452235	1.01508
ENSMUSG00000032531	1.59105	0.625871	4.70101	4.90708e-05	0.000452461	1.76237
ENSMUSG00000029203	-0.365632	5.44499	-4.70074	4.91082e-05	0.00045256	0.988066
ENSMUSG00000055737	2.89635	-2.96926	4.70035	4.91638e-05	0.000452826	1.92598
ENSMUSG00000034758	1.49042	-0.590413	4.69874	4.93911e-05	0.000454672	1.95515
ENSMUSG00000011114	0.407515	6.0002	4.69825	4.9461e-05	0.000455069	0.96607
ENSMUSG00000035314	0.752655	2.1824	4.69787	4.95146e-05	0.000455313	1.60881
ENSMUSG00000030839	0.628061	2.86042	4.69645	4.97172e-05	0.000456929	1.46408
ENSMUSG00000049672	-0.281177	5.40351	-4.69451	4.99951e-05	0.000459233	0.971644
ENSMUSG00000052117	1.82752	-0.155343	4.69352	5.01366e-05	0.000460283	1.93923
ENSMUSG00000091337	-0.654184	5.51291	-4.69274	5.02488e-05	0.000461024	0.956983
ENSMUSG00000030714	0.573899	4.3244	4.69258	5.02718e-05	0.000461024	1.15293
ENSMUSG00000039740	-0.380396	4.78481	-4.69109	5.04883e-05	0.00046276	1.05058
ENSMUSG00000020538	0.399881	6.2296	4.6906	5.05583e-05	0.000463151	0.935685
ENSMUSG00000039307	-0.301617	7.18753	-4.68988	5.06642e-05	0.000463869	0.945643
ENSMUSG00000079435	0.50048	7.58076	4.68831	5.08926e-05	0.000465709	0.947849
ENSMUSG00000086732	-1.94048	-0.728125	-4.68797	5.09425e-05	0.000465913	1.9122
ENSMUSG00000020099	3.61966	-2.02691	4.68744	5.10199e-05	0.000466323	1.9172
ENSMUSG00000018442	-0.340138	5.43064	-4.68728	5.10424e-05	0.000466323	0.970121
ENSMUSG00000021550	0.460558	4.76163	4.68603	5.12261e-05	0.000467749	1.03864
ENSMUSG00000034354	-0.511367	7.82728	-4.68268	5.17213e-05	0.000472016	0.949556
ENSMUSG00000066357	0.448822	6.35341	4.68059	5.20314e-05	0.000474591	0.904907
ENSMUSG00000078652	-1.06818	7.99907	-4.68014	5.20997e-05	0.000474957	0.966052
ENSMUSG00000042116	1.41907	-0.169903	4.67851	5.23428e-05	0.000476916	1.88942
ENSMUSG00000029148	0.488215	6.80432	4.67652	5.26434e-05	0.000479397	0.895604
ENSMUSG00000019997	3.99942	-0.323191	4.67632	5.26738e-05	0.000479416	1.91089
ENSMUSG00000053310	1.09433	4.30372	4.67545	5.28048e-05	0.000480351	1.12686
ENSMUSG00000005054	0.605122	3.56487	4.67523	5.28384e-05	0.000480398	1.30035
ENSMUSG00000075701	0.463301	5.14088	4.67422	5.29921e-05	0.000481537	0.980352
ENSMUSG00000026385	0.578264	3.98713	4.67375	5.30622e-05	0.000481915	1.20697
ENSMUSG00000038026	-1.81407	-0.0943138	-4.67126	5.34438e-05	0.00048512	1.85323
ENSMUSG00000005378	0.35963	5.03332	4.67095	5.3491e-05	0.000485289	0.963757
ENSMUSG00000016255	1.05403	3.20121	4.66986	5.36587e-05	0.000486429	1.29782
ENSMUSG00000067916	-1.32745	2.45305	-4.66976	5.36742e-05	0.000486429	1.5713
ENSMUSG00000032435	0.307046	5.69079	4.66838	5.38867e-05	0.000488095	0.894465
ENSMUSG00000022533	-0.454264	7.0325	-4.66597	5.42596e-05	0.000491209	0.876064
ENSMUSG00000049521	2.30506	-1.13124	4.66518	5.43832e-05	0.000492064	1.88857
ENSMUSG00000057396	-0.786087	2.5146	-4.66415	5.45434e-05	0.000493251	1.36512
ENSMUSG00000046688	-0.691572	4.92436	-4.66355	5.46376e-05	0.000493333	0.932406
ENSMUSG00000066191	1.25162	-0.298629	4.66352	5.46424e-05	0.000493333	1.81598
ENSMUSG00000032322	0.517321	6.0369	4.66344	5.4655e-05	0.000493333	0.876356
ENSMUSG00000029012	-0.571239	4.68192	-4.66335	5.4669e-05	0.000493333	0.956684
ENSMUSG00000047824	0.465194	6.00217	4.66205	5.48743e-05	0.000494921	0.864713
ENSMUSG00000071074	0.267098	5.69573	4.66096	5.50457e-05	0.000496203	0.870718
ENSMUSG00000044867	-0.940561	4.12759	-4.66067	5.50915e-05	0.000496351	1.09328
ENSMUSG00000090697	2.5471	-1.59607	4.65917	5.53291e-05	0.000498201	1.83411
ENSMUSG00000045589	-1.66396	-1.44346	-4.65889	5.53736e-05	0.000498201	1.85683
ENSMUSG00000019254	0.355841	6.49421	4.65881	5.5385e-05	0.000498201	0.84223
ENSMUSG00000036106	0.716096	5.87316	4.65834	5.54602e-05	0.000498479	0.854954
ENSMUSG00000034317	-1.34603	6.86378	-4.65825	5.54748e-05	0.000498479	0.86294
ENSMUSG00000031982	-0.726891	2.29471	-4.65695	5.56813e-05	0.000500068	1.45086
ENSMUSG00000018585	0.746985	4.49316	4.65591	5.58486e-05	0.000501305	1.06045
ENSMUSG00000002778	0.325942	5.99164	4.65543	5.59257e-05	0.000501617	0.83908
ENSMUSG00000032369	0.983921	4.4542	4.65532	5.59427e-05	0.000501617	0.950488
ENSMUSG00000031709	0.714553	5.7158	4.65489	5.60113e-05	0.000501967	0.850149
ENSMUSG00000053332	0.308301	7.55524	4.65458	5.60615e-05	0.000502151	0.856587
ENSMUSG00000019578	0.348804	5.63735	4.65227	5.64336e-05	0.000505217	0.851536
ENSMUSG00000025873	-0.277116	5.85898	-4.65136	5.6582e-05	0.000506277	0.831255
ENSMUSG00000053175	0.785269	5.44364	4.65052	5.67179e-05	0.000507225	0.904539
ENSMUSG00000032745	-0.438931	7.33871	-4.64895	5.69736e-05	0.000509242	0.8338
ENSMUSG00000021754	-0.572522	7.79886	-4.64859	5.70326e-05	0.000509501	0.839253
ENSMUSG00000044709	0.5005	4.87108	4.64801	5.71267e-05	0.000510073	0.927932
ENSMUSG00000052812	-0.706922	5.42439	-4.64655	5.73667e-05	0.000511945	0.843927
ENSMUSG00000045064	1.2972	0.174581	4.64571	5.75049e-05	0.000512909	1.77225
ENSMUSG00000078907	-2.74764	-1.90545	-4.64411	5.77698e-05	0.000514904	1.79624
ENSMUSG00000001053	1.06459	4.14984	4.64399	5.77895e-05	0.000514904	1.08441
ENSMUSG00000081648	-2.36	-1.46978	-4.64263	5.80153e-05	0.000516389	1.82785
ENSMUSG00000020357	2.64235	-0.830128	4.64262	5.80171e-05	0.000516389	1.81751
ENSMUSG00000025470	0.501017	3.83855	4.6415	5.82033e-05	0.000517478	1.08051
ENSMUSG00000032224	-1.37472	-0.488042	-4.64148	5.82074e-05	0.000517478	1.7378
ENSMUSG00000020376	0.422624	6.09445	4.64133	5.82312e-05	0.000517478	0.80354
ENSMUSG00000034902	0.570035	7.27081	4.64096	5.82937e-05	0.000517761	0.803145
ENSMUSG00000008855	0.511819	6.01807	4.64064	5.83472e-05	0.000517965	0.803038
ENSMUSG00000020133	0.344885	5.1011	4.63874	5.86649e-05	0.000520513	0.868003
ENSMUSG00000060591	0.955035	5.12123	4.63543	5.92239e-05	0.000525197	0.862386
ENSMUSG00000044308	-0.410023	6.52935	-4.63333	5.95827e-05	0.000528103	0.769726
ENSMUSG00000032119	-0.435008	4.22381	-4.63235	5.97491e-05	0.0005293	0.976627
ENSMUSG00000038533	0.331468	5.28967	4.62832	6.04441e-05	0.000535177	0.809518
ENSMUSG00000030199	0.437068	5.90543	4.62752	6.05818e-05	0.000536116	0.768696
ENSMUSG00000051669	3.14676	-0.834759	4.62681	6.07054e-05	0.000536929	1.77646
ENSMUSG00000021360	1.00972	4.44291	4.6261	6.08287e-05	0.000537739	0.928733
ENSMUSG00000002983	0.784804	5.95266	4.62515	6.09958e-05	0.000538935	0.776968
ENSMUSG00000084306	2.35345	-3.34616	4.62488	6.1043e-05	0.00053907	1.65299
ENSMUSG00000020153	0.414006	5.09333	4.62457	6.10967e-05	0.000539263	0.833479
ENSMUSG00000023284	-0.647311	3.45228	-4.62423	6.11559e-05	0.000539504	0.999277
ENSMUSG00000001288	0.722447	4.73347	4.62297	6.13781e-05	0.000541182	0.869814
ENSMUSG00000042073	1.22903	2.47696	4.62272	6.14208e-05	0.000541277	1.448
ENSMUSG00000071291	-1.00243	2.95998	-4.62223	6.1507e-05	0.000541483	1.23947
ENSMUSG00000029020	0.232671	5.84399	4.62174	6.15932e-05	0.000541483	0.74933
ENSMUSG00000029922	-1.72198	8.38196	-4.62166	6.16073e-05	0.000541483	0.837098
ENSMUSG00000022770	-0.256294	6.44318	-4.62158	6.16221e-05	0.000541483	0.735825
ENSMUSG00000028599	0.732153	6.88973	4.62158	6.1623e-05	0.000541483	0.740553
ENSMUSG00000028861	0.369435	4.51962	4.6215	6.16362e-05	0.000541483	0.886413
ENSMUSG00000031660	-0.389031	6.2427	-4.62026	6.18552e-05	0.000543126	0.73218
ENSMUSG00000027293	0.377312	6.42317	4.61984	6.19305e-05	0.000543505	0.733463
ENSMUSG00000074863	-0.644778	2.29163	-4.61949	6.1993e-05	0.000543771	1.32795
ENSMUSG00000070392	1.20784	1.99164	4.61892	6.2094e-05	0.000544375	1.4052
ENSMUSG00000032288	0.50329	4.90272	4.61805	6.22475e-05	0.000545355	0.856599
ENSMUSG00000030447	0.639621	6.37534	4.61793	6.22701e-05	0.000545355	0.728996
ENSMUSG00000087327	-2.37396	-2.69096	-4.61749	6.23474e-05	0.00054575	1.70301
ENSMUSG00000072762	-0.916322	3.75277	-4.61644	6.25364e-05	0.000547121	1.03847
ENSMUSG00000020097	0.340517	7.126	4.61563	6.2682e-05	0.000548111	0.732303
ENSMUSG00000040710	-0.648558	6.76934	-4.61465	6.28572e-05	0.00054936	0.72055
ENSMUSG00000019813	-0.697019	3.20192	-4.60963	6.37677e-05	0.00055703	1.08344
ENSMUSG00000079484	0.861999	2.98814	4.60884	6.39131e-05	0.000558012	1.07053
ENSMUSG00000032253	-0.615572	7.27102	-4.60853	6.39681e-05	0.000558204	0.711248
ENSMUSG00000037935	-0.284647	6.79153	-4.60707	6.42362e-05	0.000560255	0.700225
ENSMUSG00000051705	-0.918173	1.76317	-4.6064	6.43596e-05	0.000561042	1.35974
ENSMUSG00000021263	-0.945084	4.2591	-4.60609	6.44177e-05	0.00056126	0.948617
ENSMUSG00000030200	1.61896	0.718374	4.60473	6.46687e-05	0.000563157	1.68403
ENSMUSG00000026357	0.764547	3.58267	4.6041	6.4785e-05	0.00056388	1.03009
ENSMUSG00000049985	-1.0537	0.828153	-4.60377	6.48467e-05	0.000564127	1.47809
ENSMUSG00000066442	0.646925	3.40493	4.603	6.49896e-05	0.000565079	1.07677
ENSMUSG00000035107	-0.740331	2.97084	-4.60253	6.50778e-05	0.000565556	1.07807
ENSMUSG00000007038	0.672144	5.97714	4.60183	6.52076e-05	0.000566392	0.698774
ENSMUSG00000085385	-0.645484	4.70917	-4.60132	6.53028e-05	0.000566839	0.809721
ENSMUSG00000044694	-0.961811	0.742908	-4.6012	6.53259e-05	0.000566839	1.56834
ENSMUSG00000022892	0.72157	5.72832	4.60041	6.54742e-05	0.000567835	0.700294
ENSMUSG00000039168	0.373475	5.46409	4.59743	6.60339e-05	0.000572395	0.713848
ENSMUSG00000093904	0.290394	5.56643	4.59486	6.65214e-05	0.000576032	0.689484
ENSMUSG00000033128	0.327831	6.16301	4.59478	6.65369e-05	0.000576032	0.663749
ENSMUSG00000043421	0.908132	2.46481	4.59469	6.65556e-05	0.000576032	1.25219
ENSMUSG00000032485	0.440518	6.28798	4.5941	6.66673e-05	0.000576705	0.662362
ENSMUSG00000073236	-0.73422	1.98335	-4.593	6.68776e-05	0.000578229	1.25897
ENSMUSG00000073888	1.59384	0.212332	4.59103	6.72553e-05	0.000581197	1.65256
ENSMUSG00000037960	0.794983	3.75229	4.5908	6.73008e-05	0.00058122	1.00625
ENSMUSG00000045427	-0.367372	7.00131	-4.59066	6.73266e-05	0.00058122	0.659596
ENSMUSG00000000384	0.295198	5.73443	4.58983	6.74873e-05	0.00058231	0.665518
ENSMUSG00000086717	-1.4233	0.351525	-4.58928	6.75939e-05	0.000582932	1.5662
ENSMUSG00000043773	-0.965449	2.49555	-4.58807	6.78271e-05	0.000584646	1.06996
ENSMUSG00000060594	2.30292	-1.80155	4.58696	6.80435e-05	0.000586213	1.6679
ENSMUSG00000038174	-0.75562	4.24618	-4.58481	6.84631e-05	0.000589528	0.850519
ENSMUSG00000043099	1.10072	1.7682	4.58462	6.84999e-05	0.000589545	1.37164
ENSMUSG00000024835	0.406409	7.52568	4.58213	6.89902e-05	0.000593463	0.644903
ENSMUSG00000074461	-1.25927	0.00675918	-4.58139	6.91366e-05	0.000594198	1.60267
ENSMUSG00000027107	1.45068	-0.236652	4.58135	6.91459e-05	0.000594198	1.61752
ENSMUSG00000079499	0.83963	4.13504	4.57991	6.9431e-05	0.000596088	0.848983
ENSMUSG00000079645	-1.75564	-0.618851	-4.57988	6.94362e-05	0.000596088	1.61635
ENSMUSG00000031381	-0.95579	4.67318	-4.57821	6.97699e-05	0.000598649	0.688781
ENSMUSG00000009079	-0.309891	8.47055	-4.57719	6.99732e-05	0.000600089	0.669953
ENSMUSG00000049482	0.640494	4.70141	4.57691	7.00299e-05	0.000600272	0.783456
ENSMUSG00000038644	0.337773	6.70782	4.57375	7.06653e-05	0.000605411	0.603475
ENSMUSG00000047419	-0.993079	2.36338	-4.5722	7.09784e-05	0.000607786	1.101
ENSMUSG00000027656	-2.30064	-1.30355	-4.57165	7.10904e-05	0.00060826	1.63453
ENSMUSG00000028269	-1.14662	2.285	-4.57158	7.11056e-05	0.00060826	0.716474
ENSMUSG00000030854	1.75831	0.449517	4.57134	7.11542e-05	0.000608369	1.60628
ENSMUSG00000041845	2.41069	-2.71512	4.57092	7.12386e-05	0.000608782	1.53973
ENSMUSG00000021280	1.52209	-0.52934	4.56865	7.17044e-05	0.000612239	1.5609
ENSMUSG00000096958	-1.5952	0.460372	-4.56859	7.17154e-05	0.000612239	1.41777
ENSMUSG00000020801	0.627769	2.32061	4.56591	7.22677e-05	0.000616643	1.16681
ENSMUSG00000039841	-0.464333	5.64384	-4.56569	7.23131e-05	0.00061672	0.592852
ENSMUSG00000022893	3.76293	-1.86466	4.56549	7.23537e-05	0.000616755	1.61488
ENSMUSG00000073409	0.904169	7.87651	4.56489	7.24794e-05	0.000617459	0.58337
ENSMUSG00000051034	-0.754681	2.2115	-4.56474	7.25092e-05	0.000617459	1.17185
ENSMUSG00000097777	-0.854502	1.10949	-4.56336	7.27968e-05	0.000619403	1.26367
ENSMUSG00000036315	0.665149	4.18186	4.56329	7.28107e-05	0.000619403	0.827046
ENSMUSG00000063268	0.40535	5.67416	4.56257	7.29618e-05	0.000620377	0.59502
ENSMUSG00000021598	0.465714	4.68172	4.56025	7.3447e-05	0.000624189	0.705115
ENSMUSG00000032193	0.703911	5.07587	4.5576	7.40053e-05	0.000628618	0.690247
ENSMUSG00000035105	0.973653	1.25753	4.55714	7.41037e-05	0.000628843	1.46075
ENSMUSG00000019362	0.373174	5.57279	4.55713	7.41061e-05	0.000628843	0.585719
ENSMUSG00000006462	2.37394	-2.29556	4.55694	7.41447e-05	0.000628856	1.54289
ENSMUSG00000000339	0.363554	4.47385	4.55657	7.42235e-05	0.000629057	0.732908
ENSMUSG00000047842	1.58432	3.73321	4.55648	7.42428e-05	0.000629057	0.827505
ENSMUSG00000079109	-0.379608	5.00687	-4.55498	7.45619e-05	0.000631445	0.610747
[truncated: 4,278 more rows]

## Sheet: NAIVE_Age18vs3_B6
Gene.Ensembl	logFC	AveExpr	t	P.Value	adj.P.Val	B
ENSMUSG00000052837	2.75846	7.64663	28.2642	1.92511e-19	1.6198e-15	34.3997
ENSMUSG00000021250	6.04682	4.53497	28.0884	2.21526e-19	1.6198e-15	32.8315
ENSMUSG00000052684	5.88529	4.20526	27.4375	3.75324e-19	1.82958e-15	32.5111
ENSMUSG00000040435	3.23832	6.17946	24.5732	4.43397e-18	1.62106e-14	31.3618
ENSMUSG00000024190	3.0076	4.28627	18.7292	1.77267e-15	5.1847e-12	25.3765
ENSMUSG00000021796	2.8838	2.3129	17.3218	9.62167e-15	2.34512e-11	23.4777
ENSMUSG00000019850	1.69216	7.08899	14.7023	3.15072e-13	6.5823e-10	20.3539
ENSMUSG00000025888	3.43567	1.88903	13.7524	1.2684e-12	2.31864e-09	18.7609
ENSMUSG00000026011	2.65694	1.90535	13.0112	3.96864e-12	6.4486e-09	17.6384
ENSMUSG00000097194	-1.36919	5.65098	-12.8813	4.87256e-12	7.12563e-09	17.642
ENSMUSG00000034220	1.44742	4.25948	11.9665	2.16302e-11	2.87564e-08	16.2016
ENSMUSG00000090186	3.69083	4.10894	11.8928	2.44785e-11	2.98312e-08	15.9379
ENSMUSG00000006736	1.11915	3.7081	11.8394	2.67842e-11	3.01301e-08	15.9452
ENSMUSG00000029093	1.37266	3.96688	11.7836	2.94315e-11	3.07433e-08	15.833
ENSMUSG00000032496	-6.62211	-0.954257	-11.6695	3.5731e-11	3.48106e-08	11.0633
ENSMUSG00000034612	2.82053	2.16181	11.6321	3.8086e-11	3.48106e-08	15.6338
ENSMUSG00000057897	-1.71985	2.51364	-11.4348	5.34869e-11	4.60113e-08	15.3163
ENSMUSG00000050014	3.40073	-0.300523	11.3442	6.25908e-11	4.98254e-08	14.2983
ENSMUSG00000054364	2.11875	4.27821	11.3249	6.47349e-11	4.98254e-08	15.1329
ENSMUSG00000071456	-1.10016	4.11178	-11.2731	7.08567e-11	5.18104e-08	15.019
ENSMUSG00000032484	-4.55337	0.147122	-11.1554	8.71186e-11	6.00082e-08	12.9408
ENSMUSG00000068606	2.43193	2.62956	11.1163	9.33384e-11	6.00082e-08	14.7612
ENSMUSG00000095123	-1.89406	5.10986	-11.11	9.43783e-11	6.00082e-08	14.718
ENSMUSG00000056071	-6.03498	0.049343	-10.9928	1.16171e-10	6.90623e-08	11.588
ENSMUSG00000031565	2.64823	2.21793	10.9838	1.18063e-10	6.90623e-08	14.4272
ENSMUSG00000032845	1.8895	2.80416	10.7845	1.68717e-10	9.4897e-08	14.1787
ENSMUSG00000030149	-1.62997	4.14543	-10.6724	2.06678e-10	1.11943e-07	13.902
ENSMUSG00000026358	2.89916	1.86176	10.5754	2.46629e-10	1.28811e-07	13.7675
ENSMUSG00000040703	1.66606	5.45373	10.546	2.6026e-10	1.31243e-07	13.6793
ENSMUSG00000044786	0.952812	8.02439	10.4971	2.84671e-10	1.38768e-07	13.4519
ENSMUSG00000044177	1.0979	1.36284	10.4415	3.15343e-10	1.4876e-07	13.532
ENSMUSG00000037266	-0.996185	9.88943	-10.3655	3.62881e-10	1.65837e-07	13.2347
ENSMUSG00000078945	1.30525	1.79541	10.3417	3.79185e-10	1.68036e-07	13.3917
ENSMUSG00000008305	1.01181	4.2415	10.282	4.23729e-10	1.79176e-07	13.1623
ENSMUSG00000041481	2.93955	0.443211	10.2756	4.28827e-10	1.79176e-07	12.8748
ENSMUSG00000039953	0.864289	5.06376	10.2346	4.62829e-10	1.88011e-07	13.061
ENSMUSG00000054072	1.63631	5.03489	10.1387	5.53941e-10	2.18941e-07	12.8346
ENSMUSG00000000303	2.02663	1.81771	10.051	6.53513e-10	2.47827e-07	12.8502
ENSMUSG00000072915	-2.2092	4.46381	-10.045	6.60916e-10	2.47827e-07	12.8334
ENSMUSG00000068854	-0.959161	3.39568	-9.97429	7.55703e-10	2.76285e-07	12.6779
ENSMUSG00000030847	2.27009	2.47649	9.87126	9.1961e-10	3.09382e-07	12.5253
ENSMUSG00000036181	1.95249	3.09529	9.86905	9.23491e-10	3.09382e-07	12.5034
ENSMUSG00000023015	0.657121	7.20302	9.85984	9.39912e-10	3.09382e-07	12.2298
ENSMUSG00000024521	1.60333	2.35715	9.8533	9.51739e-10	3.09382e-07	12.4676
ENSMUSG00000033538	2.60564	1.06912	9.85316	9.52008e-10	3.09382e-07	12.3848
ENSMUSG00000032601	0.954153	5.35962	9.8028	1.04849e-09	3.33328e-07	12.1751
ENSMUSG00000059336	-1.29293	5.82061	-9.76449	1.12862e-09	3.51169e-07	12.1248
ENSMUSG00000046280	1.30259	2.55322	9.6877	1.30885e-09	3.98763e-07	12.1665
ENSMUSG00000003545	3.88377	3.51469	9.52755	1.78699e-09	5.31684e-07	11.8757
ENSMUSG00000025969	-1.14376	3.91372	-9.51534	1.83017e-09	5.31684e-07	11.7606
ENSMUSG00000031134	-0.774606	6.6927	-9.50867	1.8542e-09	5.31684e-07	11.5539
ENSMUSG00000003032	3.66803	0.855287	9.41693	2.21998e-09	6.24325e-07	11.3371
ENSMUSG00000045078	1.54052	3.57481	9.36946	2.43773e-09	6.72628e-07	11.5415
ENSMUSG00000067928	-1.71769	4.07959	-9.33096	2.63049e-09	7.12374e-07	11.4855
ENSMUSG00000025584	1.4653	4.21143	9.29533	2.82293e-09	7.50592e-07	11.2741
ENSMUSG00000051451	-0.80112	7.14773	-9.26804	2.98009e-09	7.7823e-07	11.0609
ENSMUSG00000085438	-0.764981	7.69359	-9.17652	3.57638e-09	9.1646e-07	10.8751
ENSMUSG00000046785	-1.14163	6.91951	-9.16842	3.63476e-09	9.1646e-07	10.8668
ENSMUSG00000044072	5.75865	-0.960232	9.07394	4.39331e-09	1.07838e-06	9.2389
ENSMUSG00000039899	4.1951	-0.584594	9.07043	4.42441e-09	1.07838e-06	10.4851
ENSMUSG00000029569	-0.728435	5.58114	-8.97928	5.31817e-09	1.27497e-06	10.5133
ENSMUSG00000029605	-0.99122	4.98759	-8.96562	5.46743e-09	1.27515e-06	10.5812
ENSMUSG00000034842	2.52338	0.705168	8.96328	5.49334e-09	1.27515e-06	10.4554
ENSMUSG00000097188	0.828762	6.5009	8.94988	5.64468e-09	1.28981e-06	10.4159
ENSMUSG00000009772	1.37728	2.03702	8.89603	6.29733e-09	1.4168e-06	10.6418
ENSMUSG00000097705	-0.826362	0.668991	-8.83562	7.1228e-09	1.57824e-06	10.2637
ENSMUSG00000071068	0.649863	7.68124	8.81278	7.46339e-09	1.61984e-06	10.1259
ENSMUSG00000059495	1.11132	5.57152	8.8083	7.53207e-09	1.61984e-06	10.1409
ENSMUSG00000097729	-1.46321	4.59893	-8.78413	7.91434e-09	1.67738e-06	10.2941
ENSMUSG00000027006	-0.725532	6.36915	-8.75393	8.42035e-09	1.75913e-06	10.0189
ENSMUSG00000045038	0.922405	3.24601	8.74586	8.56112e-09	1.76335e-06	10.192
ENSMUSG00000086629	1.37938	3.1391	8.71065	9.20422e-09	1.84709e-06	10.1944
ENSMUSG00000032064	-4.55527	-1.19293	-8.7098	9.22028e-09	1.84709e-06	7.79689
ENSMUSG00000021384	0.973429	3.40723	8.63454	1.07703e-08	2.11752e-06	10.0398
ENSMUSG00000031618	3.74483	-1.33822	8.63054	1.08598e-08	2.11752e-06	9.33341
ENSMUSG00000048376	0.678811	6.26741	8.6193	1.11155e-08	2.13885e-06	9.72965
ENSMUSG00000045231	-1.39547	3.73169	-8.60793	1.13805e-08	2.16141e-06	9.98728
ENSMUSG00000015312	1.43058	2.57381	8.57331	1.22282e-08	2.26267e-06	9.97781
ENSMUSG00000026827	-0.884172	5.38481	-8.56941	1.23276e-08	2.26267e-06	9.70877
ENSMUSG00000017002	1.61886	1.0293	8.56626	1.24087e-08	2.26267e-06	9.98204
ENSMUSG00000032020	-0.921657	4.89383	-8.56148	1.25326e-08	2.26267e-06	9.68886
ENSMUSG00000043753	4.68336	-1.15219	8.54543	1.29581e-08	2.31097e-06	9.15597
ENSMUSG00000044734	2.47725	0.904576	8.53171	1.33338e-08	2.34931e-06	9.89791
ENSMUSG00000043090	-0.915746	5.80905	-8.48714	1.46328e-08	2.5475e-06	9.47876
ENSMUSG00000076609	3.11755	2.64932	8.46222	1.54155e-08	2.65219e-06	9.76067
ENSMUSG00000064339	1.65098	10.4342	8.41934	1.68644e-08	2.86773e-06	9.35522
ENSMUSG00000074277	1.06109	3.00764	8.39613	1.77064e-08	2.9763e-06	9.57854
ENSMUSG00000052302	1.48888	2.91188	8.36938	1.87311e-08	3.11277e-06	9.42799
ENSMUSG00000026765	-1.02885	4.35616	-8.36001	1.91041e-08	3.13909e-06	9.35676
ENSMUSG00000074056	-4.05023	0.45044	-8.34758	1.9611e-08	3.18657e-06	8.63005
ENSMUSG00000061728	1.70681	2.45338	8.32911	2.03902e-08	3.2749e-06	9.49888
ENSMUSG00000034573	2.39445	1.39117	8.3242	2.06025e-08	3.2749e-06	9.47462
ENSMUSG00000026950	2.33305	2.22768	8.30871	2.12876e-08	3.34742e-06	9.39862
ENSMUSG00000046447	3.31776	2.96404	8.29529	2.19001e-08	3.4071e-06	9.42859
ENSMUSG00000031258	-1.25061	5.63557	-8.28256	2.24976e-08	3.46322e-06	9.14863
ENSMUSG00000021572	-1.35317	2.32794	-8.20948	2.62698e-08	4.00177e-06	9.2511
ENSMUSG00000048251	-0.536947	8.52017	-8.1897	2.73986e-08	4.1307e-06	8.81397
ENSMUSG00000018428	1.03116	3.71035	8.12873	3.12029e-08	4.65624e-06	8.97531
ENSMUSG00000019487	1.59909	1.37417	8.1007	3.31306e-08	4.87046e-06	9.02671
ENSMUSG00000022912	2.53782	0.219011	8.09825	3.33046e-08	4.87046e-06	8.94729
ENSMUSG00000045775	-0.784971	5.11237	-8.06988	3.53924e-08	5.11378e-06	8.59216
ENSMUSG00000037405	0.710707	5.93912	8.06626	3.56678e-08	5.11378e-06	8.54432
ENSMUSG00000006494	-0.825091	7.7833	-8.05789	3.63144e-08	5.15594e-06	8.52306
ENSMUSG00000026483	1.06545	3.52229	8.01928	3.94552e-08	5.54801e-06	8.64725
ENSMUSG00000028015	-0.620984	5.85039	-8.01369	3.99329e-08	5.56171e-06	8.45395
ENSMUSG00000046351	-0.777424	5.14401	-8.008	4.0425e-08	5.57712e-06	8.48055
ENSMUSG00000000555	-1.33704	-0.338042	-7.99583	4.14988e-08	5.62187e-06	8.79727
ENSMUSG00000041633	-2.60375	0.429484	-7.99561	4.15182e-08	5.62187e-06	8.37428
ENSMUSG00000019806	0.957458	3.31032	7.92306	4.8559e-08	6.51493e-06	8.51599
ENSMUSG00000057706	-1.02736	4.43084	-7.90945	5.00117e-08	6.64882e-06	8.38842
ENSMUSG00000045216	0.601331	5.54534	7.88783	5.24102e-08	6.90492e-06	8.17244
ENSMUSG00000026754	-0.761461	5.39653	-7.80594	6.26255e-08	8.1771e-06	8.05108
ENSMUSG00000035042	2.09313	1.92636	7.77683	6.67311e-08	8.63607e-06	8.33141
ENSMUSG00000026576	-0.653872	6.15158	-7.74056	7.22373e-08	9.22219e-06	7.83798
ENSMUSG00000066170	-1.61446	2.57281	-7.73862	7.25448e-08	9.22219e-06	8.2566
ENSMUSG00000097180	-1.21879	3.48814	-7.73147	7.369e-08	9.22219e-06	8.22326
ENSMUSG00000060586	1.88444	3.40887	7.73089	7.37826e-08	9.22219e-06	8.17113
ENSMUSG00000026203	1.18641	2.83282	7.72381	7.49368e-08	9.28708e-06	8.12257
ENSMUSG00000048215	-1.01516	2.66688	-7.69786	7.93222e-08	9.74797e-06	8.03771
ENSMUSG00000038116	-0.443269	6.51233	-7.68168	8.21919e-08	1.00165e-05	7.70468
ENSMUSG00000063077	0.735074	7.90388	7.64788	8.8532e-08	1.06999e-05	7.61019
ENSMUSG00000029603	-0.599069	8.60904	-7.63176	9.17295e-08	1.09778e-05	7.57969
ENSMUSG00000091575	-1.12902	7.67788	-7.62879	9.23323e-08	1.09778e-05	7.59435
ENSMUSG00000060675	0.725372	4.82404	7.62328	9.34611e-08	1.10224e-05	7.63301
ENSMUSG00000019971	1.68272	2.20208	7.6085	9.65563e-08	1.12396e-05	7.95835
ENSMUSG00000040102	-0.695316	5.97032	-7.60701	9.68754e-08	1.12396e-05	7.53903
ENSMUSG00000056418	-0.98458	4.85616	-7.60359	9.76084e-08	1.12396e-05	7.68442
ENSMUSG00000046410	2.08382	-0.171927	7.57974	1.02888e-07	1.17399e-05	7.91467
ENSMUSG00000095562	3.46846	2.63357	7.57679	1.03559e-07	1.17399e-05	7.90511
ENSMUSG00000058706	-0.501954	6.70456	-7.57094	1.04909e-07	1.18015e-05	7.43645
ENSMUSG00000028782	-1.82695	4.22361	-7.53638	1.13249e-07	1.26371e-05	7.81889
ENSMUSG00000039485	-0.771761	5.16121	-7.53313	1.14066e-07	1.26371e-05	7.44446
ENSMUSG00000051537	1.40269	1.90651	7.52778	1.15428e-07	1.26919e-05	7.77604
ENSMUSG00000006463	-1.11906	3.51249	-7.49574	1.23933e-07	1.35253e-05	7.63274
ENSMUSG00000083282	4.06512	0.326978	7.47759	1.29033e-07	1.39776e-05	7.26483
ENSMUSG00000036594	1.86563	3.75852	7.47218	1.30593e-07	1.40426e-05	7.5393
ENSMUSG00000054135	-2.58813	0.994384	-7.46199	1.3359e-07	1.426e-05	7.43232
ENSMUSG00000030930	-0.592723	5.28875	-7.45789	1.34815e-07	1.42864e-05	7.27516
ENSMUSG00000057143	-0.488164	6.74219	-7.45171	1.36682e-07	1.43801e-05	7.16278
ENSMUSG00000053218	-2.08519	1.08217	-7.41633	1.47898e-07	1.5449e-05	7.49205
ENSMUSG00000058997	0.76647	4.90875	7.41067	1.49776e-07	1.55343e-05	7.16957
ENSMUSG00000037926	0.620966	8.92809	7.39285	1.55859e-07	1.60513e-05	7.06432
ENSMUSG00000035275	0.998284	4.80787	7.38098	1.60049e-07	1.62627e-05	7.10922
ENSMUSG00000005225	2.38144	2.78121	7.38074	1.60136e-07	1.62627e-05	7.47617
ENSMUSG00000028494	1.5655	2.41861	7.37696	1.61494e-07	1.62875e-05	7.42166
ENSMUSG00000097204	-1.26355	2.0016	-7.37285	1.62988e-07	1.63256e-05	7.47305
ENSMUSG00000024235	1.03559	2.85538	7.35811	1.68455e-07	1.67584e-05	7.30709
ENSMUSG00000072109	1.04132	4.1581	7.34658	1.7286e-07	1.70805e-05	7.19036
ENSMUSG00000028337	1.2384	6.23944	7.33826	1.76115e-07	1.72853e-05	6.93413
ENSMUSG00000060568	2.21531	-0.833614	7.33338	1.78055e-07	1.73592e-05	7.27854
ENSMUSG00000040441	2.29291	0.803253	7.32615	1.80965e-07	1.74443e-05	7.33186
ENSMUSG00000006575	0.953013	2.3657	7.32529	1.81314e-07	1.74443e-05	7.30779
ENSMUSG00000062906	0.762858	4.03118	7.32104	1.8305e-07	1.74962e-05	7.06193
ENSMUSG00000059588	-0.998732	5.44752	-7.31475	1.85654e-07	1.76299e-05	6.91782
ENSMUSG00000030352	-1.60429	3.02122	-7.29249	1.95175e-07	1.84144e-05	7.09806
ENSMUSG00000079499	1.00234	3.47175	7.28597	1.98054e-07	1.85663e-05	7.05486
ENSMUSG00000027122	-0.616836	5.00343	-7.2743	2.03323e-07	1.89389e-05	6.88692
ENSMUSG00000079429	0.994887	3.36979	7.25124	2.1416e-07	1.9822e-05	7.02901
ENSMUSG00000000244	-0.934595	5.96663	-7.23685	2.21222e-07	2.03469e-05	6.74033
ENSMUSG00000026283	-0.580779	5.89754	-7.20079	2.39983e-07	2.19344e-05	6.62624
ENSMUSG00000021701	3.5456	-1.34489	7.18003	2.51519e-07	2.28461e-05	6.53791
ENSMUSG00000034266	0.797535	3.99629	7.15306	2.67352e-07	2.41343e-05	6.66786
ENSMUSG00000025198	1.17252	3.83711	7.144	2.72904e-07	2.44843e-05	6.71085
ENSMUSG00000027978	1.19485	5.07468	7.13805	2.76611e-07	2.46656e-05	6.6143
ENSMUSG00000024548	1.63221	3.16325	7.13344	2.79519e-07	2.47739e-05	6.84903
ENSMUSG00000042766	1.30267	1.08031	7.12894	2.82385e-07	2.48771e-05	6.94192
ENSMUSG00000025544	-0.672689	6.77824	-7.12425	2.85404e-07	2.49925e-05	6.4155
ENSMUSG00000072640	-0.818326	5.19197	-7.11266	2.9302e-07	2.55067e-05	6.52458
ENSMUSG00000067149	3.23419	0.439136	7.10519	2.98035e-07	2.57897e-05	6.71936
ENSMUSG00000087262	1.37159	2.47467	7.09055	3.08116e-07	2.65052e-05	6.73817
ENSMUSG00000032435	0.510323	5.79486	7.0859	3.11398e-07	2.66309e-05	6.35084
ENSMUSG00000090877	5.73321	0.850309	7.07771	3.17253e-07	2.69005e-05	6.78005
ENSMUSG00000020483	0.834712	4.96044	7.07429	3.19733e-07	2.69005e-05	6.37427
ENSMUSG00000030523	-0.928322	4.40211	-7.07383	3.20069e-07	2.69005e-05	6.56311
ENSMUSG00000069727	1.40132	2.15722	7.0553	3.33859e-07	2.7866e-05	6.76894
ENSMUSG00000040007	0.811934	6.09635	7.05333	3.35368e-07	2.7866e-05	6.25559
ENSMUSG00000038175	-0.604098	6.14889	-7.04398	3.42587e-07	2.83051e-05	6.26351
ENSMUSG00000096606	1.20821	2.60355	7.0351	3.49598e-07	2.8722e-05	6.70703
ENSMUSG00000024232	2.0109	-0.0517913	7.0307	3.53122e-07	2.88495e-05	6.64872
ENSMUSG00000092278	2.12934	3.32879	7.02748	3.55729e-07	2.8901e-05	6.73005
ENSMUSG00000097296	-2.3407	1.93754	-7.01333	3.67415e-07	2.96855e-05	6.67873
ENSMUSG00000097125	3.19855	0.185917	7.00233	3.76759e-07	3.01863e-05	6.53511
ENSMUSG00000073485	-2.12881	1.9484	-7.00113	3.77796e-07	3.01863e-05	6.67066
ENSMUSG00000097277	-1.172	3.42846	-6.99881	3.79805e-07	3.01863e-05	6.515
ENSMUSG00000078700	-0.741275	4.01107	-6.99464	3.83447e-07	3.03109e-05	6.38634
ENSMUSG00000024610	1.82707	5.24358	6.99098	3.86665e-07	3.0401e-05	6.24333
ENSMUSG00000034403	0.790117	5.61033	6.96364	4.1164e-07	3.21916e-05	6.06907
ENSMUSG00000038637	-0.990556	2.30068	-6.95896	4.1607e-07	3.23649e-05	6.54932
ENSMUSG00000078606	1.775	8.15421	6.94963	4.25069e-07	3.289e-05	6.01958
ENSMUSG00000021556	0.399048	6.97192	6.94415	4.30436e-07	3.313e-05	5.99371
ENSMUSG00000092060	0.75217	6.11777	6.93483	4.39743e-07	3.36691e-05	5.97264
ENSMUSG00000042369	-0.550691	5.3544	-6.92285	4.52001e-07	3.44274e-05	6.01737
ENSMUSG00000031681	0.639913	4.69014	6.90479	4.71142e-07	3.55411e-05	6.02583
ENSMUSG00000075602	1.55194	6.35414	6.90382	4.72192e-07	3.55411e-05	6.19005
ENSMUSG00000068036	1.3991	4.13406	6.90224	4.73913e-07	3.55411e-05	6.26097
ENSMUSG00000044583	-1.62926	2.6078	-6.88897	4.88593e-07	3.61386e-05	6.33706
ENSMUSG00000086127	1.92444	-0.108317	6.8884	4.89237e-07	3.61386e-05	6.37592
ENSMUSG00000041779	-0.687347	4.11774	-6.88796	4.89734e-07	3.61386e-05	6.11763
ENSMUSG00000085603	-0.592257	6.74769	-6.88615	4.91766e-07	3.61386e-05	5.87053
ENSMUSG00000027180	-0.524646	5.78774	-6.84905	5.35636e-07	3.91657e-05	5.81591
ENSMUSG00000033446	-0.592142	5.76252	-6.82595	5.64948e-07	4.11035e-05	5.7722
ENSMUSG00000028042	1.9503	0.588889	6.80722	5.89917e-07	4.27076e-05	6.20108
ENSMUSG00000086502	-0.860954	3.86792	-6.79031	6.13429e-07	4.4136e-05	5.92627
ENSMUSG00000018740	-0.833899	3.28871	-6.78873	6.15682e-07	4.4136e-05	6.01918
ENSMUSG00000071369	1.00059	5.64354	6.77693	6.32711e-07	4.51354e-05	5.63884
ENSMUSG00000061510	-1.7672	0.860508	-6.77397	6.37062e-07	4.52252e-05	6.14081
ENSMUSG00000049985	-1.66889	1.17633	-6.76575	6.493e-07	4.57948e-05	6.15331
ENSMUSG00000089726	-1.41303	4.61011	-6.76439	6.51348e-07	4.57948e-05	5.88277
ENSMUSG00000079455	2.08297	1.85971	6.7577	6.61529e-07	4.6288e-05	6.13531
ENSMUSG00000057894	-0.84413	6.2188	-6.75016	6.73185e-07	4.68794e-05	5.57402
ENSMUSG00000090086	-0.997365	6.08528	-6.73976	6.89608e-07	4.77954e-05	5.59173
ENSMUSG00000074030	-0.555369	5.15681	-6.73504	6.97192e-07	4.80931e-05	5.59201
ENSMUSG00000069072	1.04365	3.1889	6.7235	7.16111e-07	4.91662e-05	5.88852
ENSMUSG00000049047	-0.80905	3.21412	-6.71102	7.37162e-07	5.0375e-05	5.84075
ENSMUSG00000010142	-0.900814	4.34988	-6.70428	7.488e-07	5.09324e-05	5.6687
ENSMUSG00000002100	3.58905	-2.37505	6.69995	7.56379e-07	5.12097e-05	4.82175
ENSMUSG00000022586	2.15262	3.4456	6.69721	7.612e-07	5.12986e-05	5.9773
ENSMUSG00000073421	1.79134	3.13381	6.69023	7.73651e-07	5.18985e-05	5.81062
ENSMUSG00000028710	-0.546477	4.64951	-6.68678	7.79882e-07	5.20017e-05	5.56512
ENSMUSG00000092274	-0.987277	9.46146	-6.68545	7.82301e-07	5.20017e-05	5.41571
ENSMUSG00000032285	1.42427	5.47723	6.67739	7.97104e-07	5.27459e-05	5.44322
ENSMUSG00000029826	0.421297	8.95996	6.6585	8.32931e-07	5.48684e-05	5.3599
ENSMUSG00000092837	2.59127	0.187079	6.65416	8.41395e-07	5.51774e-05	5.90344
ENSMUSG00000038188	-1.58867	2.19084	-6.63993	8.69761e-07	5.6783e-05	5.86198
ENSMUSG00000085622	-1.12708	4.23667	-6.63516	8.79502e-07	5.71637e-05	5.53637
ENSMUSG00000092558	-0.571797	5.70861	-6.62324	9.04283e-07	5.8333e-05	5.29198
ENSMUSG00000039740	-0.810047	5.24903	-6.62268	9.0547e-07	5.8333e-05	5.35785
ENSMUSG00000086877	-1.5752	1.37898	-6.61519	9.2144e-07	5.91015e-05	5.80698
ENSMUSG00000075042	-2.70442	1.9456	-6.60467	9.44363e-07	6.03073e-05	5.70236
ENSMUSG00000097290	-0.694708	5.15554	-6.59568	9.64403e-07	6.13193e-05	5.32146
ENSMUSG00000047293	2.03469	1.27111	6.58892	9.79751e-07	6.18866e-05	5.75555
ENSMUSG00000019813	-0.566925	4.22171	-6.58803	9.8179e-07	6.18866e-05	5.41232
ENSMUSG00000028247	-0.944108	2.46671	-6.58278	9.93913e-07	6.23819e-05	5.65599
ENSMUSG00000028885	2.3142	-1.74924	6.57383	1.01495e-06	6.34303e-05	5.67092
ENSMUSG00000011267	1.23467	1.41965	6.56344	1.03991e-06	6.47136e-05	5.64756
ENSMUSG00000022217	-0.637623	4.65383	-6.56077	1.04645e-06	6.48442e-05	5.33698
ENSMUSG00000098024	-2.0867	0.635846	-6.55692	1.05592e-06	6.51554e-05	5.56019
ENSMUSG00000055633	-1.20884	2.15127	-6.55164	1.06905e-06	6.5688e-05	5.65294
ENSMUSG00000021661	-0.571529	5.03955	-6.53357	1.11529e-06	6.82425e-05	5.18102
ENSMUSG00000029657	2.09888	6.90483	6.52647	1.134e-06	6.90987e-05	5.02431
ENSMUSG00000037997	-0.551565	5.79045	-6.52203	1.14586e-06	6.93276e-05	5.06472
ENSMUSG00000049532	-0.853523	1.8728	-6.52123	1.14802e-06	6.93276e-05	5.43622
ENSMUSG00000051344	0.767748	3.95428	6.51976	1.15198e-06	6.93276e-05	5.22864
ENSMUSG00000089998	-2.45201	0.864617	-6.5172	1.15892e-06	6.94593e-05	5.58314
ENSMUSG00000024966	1.41665	7.04587	6.51523	1.16429e-06	6.94963e-05	4.99016
ENSMUSG00000023944	0.555744	10.3347	6.51104	1.17582e-06	6.9899e-05	5.07003
ENSMUSG00000035067	4.90847	-0.711478	6.50684	1.18746e-06	7.03051e-05	4.8893
ENSMUSG00000052214	0.58146	5.15474	6.5018	1.20159e-06	7.08548e-05	5.01965
ENSMUSG00000036192	-1.3073	8.80669	-6.49758	1.21354e-06	7.12723e-05	4.95591
ENSMUSG00000029432	-0.828493	4.90431	-6.48947	1.2369e-06	7.23539e-05	5.10794
ENSMUSG00000088088	3.17288	0.371302	6.48588	1.24738e-06	7.26763e-05	5.51211
ENSMUSG00000039050	-0.496755	5.10042	-6.4741	1.28239e-06	7.43597e-05	4.98831
ENSMUSG00000053113	0.883353	6.88427	6.47117	1.29125e-06	7.43597e-05	4.88015
ENSMUSG00000020120	1.55683	1.67046	6.47108	1.29153e-06	7.43597e-05	5.47402
ENSMUSG00000074604	-0.751784	6.12517	-6.46482	1.31069e-06	7.50166e-05	4.91492
ENSMUSG00000016624	0.976412	2.47584	6.46401	1.3132e-06	7.50166e-05	5.22229
ENSMUSG00000019916	1.26002	5.56025	6.45907	1.32854e-06	7.55858e-05	4.88145
ENSMUSG00000026279	0.629478	3.43445	6.45735	1.33394e-06	7.55858e-05	5.15052
ENSMUSG00000038486	-1.4047	3.75193	-6.45584	1.33867e-06	7.55858e-05	5.32284
ENSMUSG00000022018	-0.771053	4.94438	-6.44566	1.37115e-06	7.71221e-05	4.90753
ENSMUSG00000033730	-1.16444	3.92343	-6.42004	1.45647e-06	8.16069e-05	5.10195
ENSMUSG00000042064	0.999402	1.83644	6.4167	1.46798e-06	8.17711e-05	5.26332
ENSMUSG00000037833	1.75589	-0.456095	6.41595	1.47058e-06	8.17711e-05	5.32856
ENSMUSG00000021892	0.553301	7.14072	6.41026	1.49043e-06	8.2561e-05	4.73374
ENSMUSG00000037287	-0.449384	7.15439	-6.40819	1.49773e-06	8.26522e-05	4.73219
ENSMUSG00000045411	-0.593975	7.4382	-6.40507	1.50882e-06	8.28952e-05	4.72456
ENSMUSG00000064181	0.710383	6.03317	6.40376	1.51347e-06	8.28952e-05	4.74187
ENSMUSG00000027677	-0.771124	7.59124	-6.39914	1.53005e-06	8.34907e-05	4.71134
ENSMUSG00000024384	-0.497301	6.97474	-6.39199	1.55611e-06	8.41938e-05	4.69426
ENSMUSG00000039831	-1.73515	1.75441	-6.39142	1.55821e-06	8.41938e-05	5.29371
ENSMUSG00000030469	-0.805699	3.73107	-6.39088	1.56021e-06	8.41938e-05	5.00792
ENSMUSG00000022885	-0.681486	7.35054	-6.38802	1.57075e-06	8.44511e-05	4.68485
ENSMUSG00000040078	1.22934	3.71868	6.38364	1.58711e-06	8.50181e-05	4.89673
ENSMUSG00000044867	-0.838148	4.70187	-6.37234	1.63005e-06	8.69996e-05	4.83215
ENSMUSG00000085289	2.67923	0.746093	6.37072	1.63628e-06	8.70146e-05	5.25063
ENSMUSG00000055541	1.10382	2.98634	6.3672	1.64998e-06	8.74251e-05	4.98634
ENSMUSG00000097236	-2.90116	-0.0040064	-6.36549	1.65665e-06	8.74616e-05	4.85771
ENSMUSG00000034120	-0.49487	8.44384	-6.3584	1.68465e-06	8.86199e-05	4.62362
ENSMUSG00000029233	-0.569306	4.95088	-6.35076	1.71538e-06	8.9913e-05	4.72302
ENSMUSG00000022403	0.909237	6.59361	6.34313	1.74664e-06	9.12246e-05	4.57606
ENSMUSG00000029474	-0.497204	5.07752	-6.34032	1.7583e-06	9.15067e-05	4.67751
ENSMUSG00000046546	2.68279	-1.09624	6.33151	1.79533e-06	9.31027e-05	4.89644
ENSMUSG00000046388	1.34205	0.571989	6.32377	1.82855e-06	9.44902e-05	5.15901
ENSMUSG00000002804	-0.657659	2.81063	-6.31682	1.85894e-06	9.57223e-05	4.88337
ENSMUSG00000046516	-0.606322	5.38624	-6.29802	1.94363e-06	9.94287e-05	4.55438
ENSMUSG00000068463	-1.9276	1.83866	-6.29769	1.94515e-06	9.94287e-05	5.08568
ENSMUSG00000026933	0.623315	5.51531	6.29636	1.95132e-06	9.94287e-05	4.51805
ENSMUSG00000031652	0.425893	6.05889	6.27079	2.07342e-06	0.000105284	4.41839
ENSMUSG00000014932	2.9463	-0.183718	6.26777	2.08834e-06	0.000105675	5.00453
ENSMUSG00000091831	2.28736	0.885052	6.26523	2.10096e-06	0.000105946	5.00067
ENSMUSG00000021120	-0.630574	4.11001	-6.25709	2.14201e-06	0.000107645	4.65297
ENSMUSG00000084760	2.13079	0.172608	6.24076	2.22683e-06	0.000111162	4.96869
ENSMUSG00000041966	-0.572853	5.75404	-6.24069	2.22719e-06	0.000111162	4.38527
ENSMUSG00000037788	0.465669	5.85091	6.22418	2.3164e-06	0.000115221	4.31869
ENSMUSG00000021824	-0.475962	6.23915	-6.21975	2.341e-06	0.00011605	4.30149
ENSMUSG00000070282	-1.07625	2.36214	-6.21182	2.38561e-06	0.000117862	4.84316
ENSMUSG00000000056	0.564999	5.79149	6.20968	2.3978e-06	0.000118066	4.28881
ENSMUSG00000051627	1.86905	0.397595	6.20688	2.41383e-06	0.000118456	4.88233
ENSMUSG00000020009	0.869629	7.42865	6.19812	2.46475e-06	0.00012055	4.22844
ENSMUSG00000000627	0.661862	5.98529	6.19657	2.47385e-06	0.000120592	4.24434
ENSMUSG00000073437	-0.706808	4.56243	-6.18323	2.5538e-06	0.000124076	4.40865
ENSMUSG00000079419	-0.725094	5.38503	-6.17581	2.59943e-06	0.000125874	4.26835
ENSMUSG00000009073	0.416479	6.11165	6.17198	2.62329e-06	0.000126611	4.18034
ENSMUSG00000035983	1.46459	1.30221	6.15786	2.71322e-06	0.00013052	4.75326
ENSMUSG00000048264	0.931954	2.82117	6.15481	2.73303e-06	0.000131042	4.48658
ENSMUSG00000020522	-0.47281	5.87039	-6.15184	2.75246e-06	0.000131543	4.15176
ENSMUSG00000045767	-0.540042	7.05295	-6.12912	2.90606e-06	0.000138414	4.06077
ENSMUSG00000048521	-0.701169	5.53362	-6.12781	2.91518e-06	0.000138414	4.07602
ENSMUSG00000035640	-0.67502	4.18955	-6.12212	2.95511e-06	0.000139856	4.30246
ENSMUSG00000052563	-0.953739	3.49837	-6.10823	3.05496e-06	0.000143901	4.51662
ENSMUSG00000022679	1.59945	2.01482	6.10751	3.06027e-06	0.000143901	4.59856
ENSMUSG00000047454	0.578729	4.05738	6.10034	3.11324e-06	0.000145923	4.2196
ENSMUSG00000039007	1.57407	-0.0381171	6.098	3.1307e-06	0.000146273	4.60514
ENSMUSG00000094525	-0.745182	2.30209	-6.09601	3.14566e-06	0.000146504	4.3335
ENSMUSG00000043943	3.68792	-2.30995	6.09218	3.17462e-06	0.000146735	4.00037
ENSMUSG00000045165	-0.720359	7.14482	-6.09155	3.17945e-06	0.000146735	3.97224
ENSMUSG00000030029	0.439485	5.45099	6.09138	3.18074e-06	0.000146735	4.01729
ENSMUSG00000090936	-2.15506	-0.136624	-6.08476	3.2316e-06	0.000148613	4.28727
ENSMUSG00000089788	-1.015	6.51645	-6.08185	3.25422e-06	0.00014916	3.98144
ENSMUSG00000087497	-0.858396	3.80565	-6.08061	3.2639e-06	0.00014916	4.24008
ENSMUSG00000059824	-0.585259	4.21003	-6.07796	3.28464e-06	0.0001495	4.25223
ENSMUSG00000025190	0.540494	4.79867	6.07706	3.29179e-06	0.0001495	4.07735
ENSMUSG00000070427	1.22441	1.96468	6.07375	3.31797e-06	0.000150223	4.5081
ENSMUSG00000002031	-0.637318	4.36242	-6.06023	3.42731e-06	0.000154694	4.14982
ENSMUSG00000002204	1.79517	0.262377	6.04218	3.579e-06	0.000160626	4.48421
ENSMUSG00000020828	1.03235	2.98417	6.04198	3.58068e-06	0.000160626	4.32501
ENSMUSG00000044471	2.71432	0.244282	6.03725	3.62156e-06	0.000160777	4.46766
ENSMUSG00000021457	2.14812	2.68162	6.03665	3.62678e-06	0.000160777	4.39913
ENSMUSG00000003352	2.04971	-0.746488	6.03613	3.63137e-06	0.000160777	4.48115
ENSMUSG00000067203	0.649925	4.39242	6.03552	3.63664e-06	0.000160777	3.98267
ENSMUSG00000022414	-0.873335	4.45653	-6.03525	3.63903e-06	0.000160777	4.03423
ENSMUSG00000028771	0.59616	5.69422	6.0293	3.6914e-06	0.000161991	3.85521
ENSMUSG00000024013	2.40441	-0.180709	6.02901	3.69397e-06	0.000161991	4.34413
ENSMUSG00000069516	-1.86819	1.26588	-6.02836	3.69973e-06	0.000161991	4.47351
ENSMUSG00000052477	1.34201	4.76263	6.02038	3.77134e-06	0.000164633	4.02828
ENSMUSG00000068252	0.992004	5.33854	6.01774	3.79539e-06	0.00016519	4.10187
ENSMUSG00000082233	1.96833	0.385892	6.01322	3.83681e-06	0.000166497	4.43925
ENSMUSG00000031570	0.906901	2.83747	6.01181	3.84987e-06	0.000166512	4.24393
ENSMUSG00000015950	0.655498	5.92899	6.01072	3.85992e-06	0.000166512	3.79537
ENSMUSG00000043602	-0.961925	2.85715	-5.98997	4.05744e-06	0.000174518	4.22162
ENSMUSG00000022197	2.0681	1.21194	5.98105	4.14549e-06	0.000177782	4.36595
ENSMUSG00000013846	-0.710368	7.35048	-5.97748	4.18125e-06	0.000178752	3.69356
ENSMUSG00000041459	-0.602509	8.68131	-5.97636	4.19256e-06	0.000178752	3.70542
ENSMUSG00000037071	2.08025	2.60385	5.96571	4.30144e-06	0.000182861	4.21944
ENSMUSG00000057134	-0.479618	5.11616	-5.96329	4.32653e-06	0.000182947	3.74814
ENSMUSG00000026193	-3.50901	-1.63666	-5.96311	4.32847e-06	0.000182947	3.49862
ENSMUSG00000029920	-0.579916	5.3091	-5.94245	4.54936e-06	0.000191728	3.6994
ENSMUSG00000031129	-0.542086	5.3044	-5.93407	4.64229e-06	0.000195083	3.66848
ENSMUSG00000035629	0.585658	4.83452	5.93199	4.66556e-06	0.000195499	3.70391
ENSMUSG00000024472	-0.616682	6.54038	-5.91737	4.83311e-06	0.000201773	3.55352
ENSMUSG00000087624	-1.38134	1.68082	-5.91654	4.84288e-06	0.000201773	4.21564
ENSMUSG00000028820	0.550355	8.43475	5.91299	4.88445e-06	0.000202927	3.55307
ENSMUSG00000084329	3.39397	-1.27878	5.91154	4.9016e-06	0.000203062	3.47822
ENSMUSG00000023079	-0.939741	3.30402	-5.88862	5.18062e-06	0.000214015	3.87117
ENSMUSG00000024600	-1.89506	0.784579	-5.88243	5.25867e-06	0.000216628	4.15871
ENSMUSG00000051341	0.928464	3.52633	5.87882	5.30474e-06	0.000217912	3.7132
ENSMUSG00000047547	0.501842	4.63825	5.87525	5.35076e-06	0.000219186	3.59144
ENSMUSG00000037339	-0.529385	5.98601	-5.86774	5.44876e-06	0.000222577	3.4669
ENSMUSG00000085704	-1.3729	1.10128	-5.86307	5.51067e-06	0.000224479	4.1119
ENSMUSG00000036432	0.957385	3.5253	5.85689	5.5937e-06	0.000227229	3.68818
ENSMUSG00000050232	0.839046	3.35527	5.85402	5.6327e-06	0.000228179	3.7291
ENSMUSG00000029647	0.520372	7.58238	5.85048	5.68118e-06	0.000229507	3.38201
ENSMUSG00000037979	0.932789	3.71914	5.84126	5.80934e-06	0.000234038	3.62086
ENSMUSG00000030002	0.360287	8.2018	5.83518	5.89558e-06	0.00023686	3.35806
ENSMUSG00000079685	1.2915	1.92334	5.83297	5.92722e-06	0.000237479	3.82155
ENSMUSG00000032599	-0.436478	5.05199	-5.83139	5.94998e-06	0.000237739	3.47068
ENSMUSG00000035545	-0.646377	9.12098	-5.82821	5.99596e-06	0.000238581	3.35013
ENSMUSG00000026012	-0.523142	7.26179	-5.82768	6.00368e-06	0.000238581	3.32705
ENSMUSG00000035759	-1.09902	1.44162	-5.81358	6.21229e-06	0.000246202	3.97827
ENSMUSG00000022900	-0.776443	2.65228	-5.80313	6.37174e-06	0.000251839	3.74609
ENSMUSG00000072612	2.18612	0.171655	5.80056	6.41156e-06	0.00025273	3.95801
ENSMUSG00000083796	2.76348	-1.1833	5.79909	6.4345e-06	0.000252952	3.7143
ENSMUSG00000022797	0.608899	5.88439	5.79714	6.46497e-06	0.000253469	3.27656
ENSMUSG00000001774	1.18819	6.47343	5.78916	6.59128e-06	0.00025773	3.23472
ENSMUSG00000097320	-1.07514	3.00525	-5.7874	6.61955e-06	0.000258145	3.75882
ENSMUSG00000054843	-1.0757	3.29291	-5.7861	6.64038e-06	0.000258269	3.69654
ENSMUSG00000025068	0.923654	3.1193	5.78178	6.7104e-06	0.0002603	3.61313
ENSMUSG00000020647	0.574781	6.02649	5.77971	6.74425e-06	0.00026092	3.23251
ENSMUSG00000027422	0.564018	6.74545	5.77717	6.78599e-06	0.000261659	3.20839
ENSMUSG00000053297	0.889897	2.46165	5.77637	6.79912e-06	0.000261659	3.66568
ENSMUSG00000028268	0.707675	4.67449	5.77362	6.84463e-06	0.000262612	3.33889
ENSMUSG00000043168	2.67761	-0.393989	5.77271	6.85982e-06	0.000262612	3.61282
ENSMUSG00000020227	2.03088	0.563554	5.76763	6.94501e-06	0.000264683	3.89521
ENSMUSG00000045092	-0.535759	9.10474	-5.76732	6.95009e-06	0.000264683	3.20729
ENSMUSG00000054892	-0.351893	7.24531	-5.76029	7.06984e-06	0.000267937	3.16102
ENSMUSG00000034634	1.4845	-0.831783	5.76015	7.07219e-06	0.000267937	3.87621
ENSMUSG00000029471	-0.546118	4.98396	-5.75544	7.15363e-06	0.000270322	3.28268
ENSMUSG00000028041	1.34652	0.953249	5.75258	7.2036e-06	0.000271446	3.83858
ENSMUSG00000049804	-1.44555	1.38468	-5.75161	7.22048e-06	0.000271446	3.65259
ENSMUSG00000026723	-0.78642	3.18772	-5.74941	7.25928e-06	0.000272204	3.61289
ENSMUSG00000050373	-1.15419	3.76107	-5.73832	7.45765e-06	0.000278927	3.54343
ENSMUSG00000025997	-1.28133	3.36078	-5.73672	7.48663e-06	0.000279297	3.52922
ENSMUSG00000028580	0.354951	7.19649	5.73236	7.56646e-06	0.000281557	3.09077
ENSMUSG00000085956	-1.84501	0.81521	-5.73018	7.60658e-06	0.000282331	3.80216
ENSMUSG00000053080	-1.33563	2.95878	-5.72408	7.72026e-06	0.000285825	3.63115
ENSMUSG00000053192	-0.727621	4.66947	-5.72195	7.76049e-06	0.000286589	3.27466
ENSMUSG00000021540	-0.538145	6.28001	-5.71496	7.89351e-06	0.000290767	3.07188
ENSMUSG00000037815	0.579727	4.13776	5.71213	7.94803e-06	0.00029204	3.20801
ENSMUSG00000025607	-0.555528	4.73536	-5.69833	8.21966e-06	0.000301264	3.1587
ENSMUSG00000032344	0.613699	3.87521	5.69428	8.30113e-06	0.000303489	3.27429
ENSMUSG00000027035	-0.822292	4.09903	-5.68397	8.51212e-06	0.000310427	3.2086
ENSMUSG00000057541	0.437307	5.44712	5.68283	8.5358e-06	0.000310516	3.02838
ENSMUSG00000035798	-0.562002	5.65538	-5.68172	8.55907e-06	0.00031059	3.04487
ENSMUSG00000004040	0.515854	7.9051	5.67605	8.67806e-06	0.000313866	2.9652
ENSMUSG00000046027	0.60397	4.63972	5.67538	8.69227e-06	0.000313866	3.11227
ENSMUSG00000059474	0.43087	6.13775	5.67328	8.73694e-06	0.000314702	2.96519
ENSMUSG00000003379	1.27567	3.37039	5.67032	8.80012e-06	0.000316199	3.43688
ENSMUSG00000057246	2.39676	0.699738	5.65825	9.06293e-06	0.000324844	3.60137
ENSMUSG00000062075	0.548777	4.70879	5.65679	9.09525e-06	0.000325205	3.06023
ENSMUSG00000047045	-0.667913	6.01391	-5.65501	9.13494e-06	0.000325828	2.93093
ENSMUSG00000026123	0.406579	5.83806	5.65223	9.19706e-06	0.000327245	2.92137
ENSMUSG00000032714	-0.664342	4.02404	-5.64677	9.32033e-06	0.000330397	3.2
ENSMUSG00000039835	-1.18943	2.34675	-5.64631	9.33082e-06	0.000330397	3.48366
ENSMUSG00000018411	4.08597	-2.53451	5.63874	9.50476e-06	0.000335599	2.90628
ENSMUSG00000002103	-0.608696	4.16541	-5.63793	9.52362e-06	0.000335599	3.16025
ENSMUSG00000041439	0.449292	4.58325	5.63508	9.59011e-06	0.000336591	2.90779
ENSMUSG00000097412	-0.921101	2.43399	-5.63475	9.59781e-06	0.000336591	3.45181
ENSMUSG00000041264	0.350397	6.31227	5.63243	9.65224e-06	0.00033769	2.85489
ENSMUSG00000024276	-0.714828	6.59133	-5.63039	9.70049e-06	0.000338184	2.85458
ENSMUSG00000020863	-0.841556	8.09148	-5.62988	9.71262e-06	0.000338184	2.84638
ENSMUSG00000024677	-0.390505	9.81669	-5.62792	9.75912e-06	0.000338996	2.88949
ENSMUSG00000052005	-0.612234	7.38173	-5.62624	9.79913e-06	0.000339239	2.83337
ENSMUSG00000028701	-2.94031	0.252856	-5.62568	9.81252e-06	0.000339239	3.36656
ENSMUSG00000090100	0.900656	4.37206	5.62331	9.86956e-06	0.000340007	3.20153
ENSMUSG00000068860	1.31916	1.26145	5.62283	9.88123e-06	0.000340007	3.52608
ENSMUSG00000038187	0.617999	3.95066	5.61891	9.97615e-06	0.000342468	3.07856
ENSMUSG00000058174	0.838147	7.7477	5.61685	1.00264e-05	0.000343388	2.82361
ENSMUSG00000079017	-1.43804	4.57284	-5.61473	1.00786e-05	0.000344333	3.07464
ENSMUSG00000017754	1.1469	3.92817	5.61381	1.01011e-05	0.000344333	3.3463
ENSMUSG00000040746	-0.565022	8.13463	-5.60881	1.02253e-05	0.000347756	2.79676
ENSMUSG00000021368	-1.29023	1.71476	-5.60429	1.03388e-05	0.0003508	3.47849
ENSMUSG00000020289	-0.551295	4.91776	-5.60314	1.0368e-05	0.000350974	2.93588
ENSMUSG00000020288	1.50091	5.0558	5.59476	1.05827e-05	0.000357415	2.83529
ENSMUSG00000062014	-0.732065	7.12754	-5.5931	1.06255e-05	0.000358037	2.75304
ENSMUSG00000097164	-0.963616	4.60488	-5.58916	1.07284e-05	0.00036067	3.07759
ENSMUSG00000038332	-0.573933	6.92902	-5.5799	1.0974e-05	0.000368082	2.72115
ENSMUSG00000055923	-0.711789	4.66785	-5.57787	1.10288e-05	0.000368469	2.91922
ENSMUSG00000032737	1.55753	3.3295	5.5776	1.10359e-05	0.000368469	3.40792
ENSMUSG00000048899	2.37446	0.772433	5.5698	1.12486e-05	0.000374488	3.38368
ENSMUSG00000047884	-2.73783	-0.451845	-5.56912	1.12674e-05	0.000374488	3.22216
ENSMUSG00000032373	0.748848	3.80615	5.56456	1.13937e-05	0.000377705	3.00569
ENSMUSG00000066235	1.44973	-0.121013	5.56377	1.14159e-05	0.000377705	3.37761
ENSMUSG00000022901	-0.805598	3.26393	-5.56044	1.15091e-05	0.00037993	3.00636
ENSMUSG00000056537	-0.525359	6.80163	-5.54877	1.18427e-05	0.000390062	2.642
ENSMUSG00000009681	0.666987	4.85979	5.54623	1.19165e-05	0.000391611	2.71637
ENSMUSG00000092416	0.558263	5.51447	5.5453	1.19438e-05	0.000391628	2.67957
ENSMUSG00000030724	1.81376	2.02838	5.54435	1.19717e-05	0.000391665	3.26873
ENSMUSG00000024042	0.847564	5.78071	5.54208	1.20382e-05	0.000392549	2.67817
ENSMUSG00000030341	-0.483865	5.21576	-5.54006	1.20979e-05	0.000392549	2.71878
ENSMUSG00000049090	-0.411779	5.77512	-5.53999	1.21002e-05	0.000392549	2.66155
ENSMUSG00000030714	0.628193	4.69096	5.53919	1.2124e-05	0.000392549	2.7511
ENSMUSG00000018379	-0.617923	8.54929	-5.53888	1.2133e-05	0.000392549	2.63315
ENSMUSG00000025505	-0.680386	5.23228	-5.53305	1.23076e-05	0.00039732	2.71125
ENSMUSG00000086860	-2.25629	-0.752429	-5.51895	1.27402e-05	0.000408054	3.16587
ENSMUSG00000002996	-0.433225	6.82653	-5.51865	1.27494e-05	0.000408054	2.56859
ENSMUSG00000036777	-2.00677	-0.331177	-5.51859	1.27514e-05	0.000408054	3.27394
ENSMUSG00000029311	0.601553	5.25402	5.51838	1.2758e-05	0.000408054	2.62569
ENSMUSG00000090069	1.57958	3.15765	5.51686	1.28056e-05	0.000408054	3.00754
ENSMUSG00000048249	-0.549535	6.9718	-5.51541	1.28514e-05	0.000408054	2.56002
ENSMUSG00000097569	2.38292	-0.673236	5.51527	1.28558e-05	0.000408054	3.23223
ENSMUSG00000055323	-2.64603	-1.26374	-5.51497	1.28652e-05	0.000408054	3.08692
ENSMUSG00000068299	-0.806361	1.51084	-5.51414	1.28912e-05	0.000408054	3.01759
ENSMUSG00000033885	0.420011	5.91447	5.51249	1.29434e-05	0.000408821	2.583
ENSMUSG00000089774	1.32191	4.32024	5.50811	1.30834e-05	0.000412352	2.66749
ENSMUSG00000057069	0.540465	4.75555	5.50531	1.31734e-05	0.000414297	2.68475
ENSMUSG00000096952	-0.962127	2.69985	-5.50056	1.33277e-05	0.000418098	3.08361
ENSMUSG00000041132	0.528636	5.54555	5.49984	1.33515e-05	0.000418098	2.56588
ENSMUSG00000020644	0.736903	6.16341	5.49636	1.34656e-05	0.000420418	2.58153
ENSMUSG00000049653	-2.32522	-1.43938	-5.49563	1.34898e-05	0.000420418	2.89532
ENSMUSG00000046380	-1.16699	2.65808	-5.49497	1.35118e-05	0.000420418	3.12213
ENSMUSG00000026821	0.650845	4.0983	5.49286	1.35818e-05	0.000421699	2.7586
ENSMUSG00000026107	-0.72692	6.0102	-5.48778	1.37521e-05	0.000426081	2.53635
ENSMUSG00000097174	-1.62225	0.552871	-5.48447	1.38642e-05	0.000427911	3.24154
ENSMUSG00000000948	-2.7047	-0.333158	-5.48431	1.38697e-05	0.000427911	2.97968
ENSMUSG00000090103	1.66956	0.699369	5.48076	1.39913e-05	0.000430755	3.2292
ENSMUSG00000062373	0.699432	3.88474	5.47763	1.40991e-05	0.000433163	2.69367
ENSMUSG00000032216	-0.642349	5.83171	-5.47577	1.41637e-05	0.000434234	2.47729
ENSMUSG00000045594	-0.491185	4.58504	-5.4637	1.45895e-05	0.000446353	2.55482
ENSMUSG00000017418	-0.624205	5.12708	-5.46232	1.46389e-05	0.00044693	2.53137
ENSMUSG00000025316	0.674366	5.04064	5.46027	1.4713e-05	0.000447665	2.52665
ENSMUSG00000055069	2.90295	-0.651457	5.45996	1.47242e-05	0.000447665	2.99332
ENSMUSG00000053560	0.69434	6.79158	5.44681	1.52074e-05	0.000461395	2.38966
ENSMUSG00000045251	-0.723479	3.89032	-5.44258	1.53664e-05	0.000464762	2.74852
ENSMUSG00000057691	0.38396	5.81023	5.44217	1.53819e-05	0.000464762	2.40818
ENSMUSG00000034216	-0.675644	4.2827	-5.43821	1.55322e-05	0.000468205	2.62442
ENSMUSG00000019986	0.551496	4.3833	5.43748	1.556e-05	0.000468205	2.57295
ENSMUSG00000037731	1.10643	2.60796	5.43665	1.55919e-05	0.000468205	2.77017
ENSMUSG00000040584	0.745409	5.06048	5.43058	1.58261e-05	0.000474264	2.42809
ENSMUSG00000069114	1.08034	3.41147	5.42903	1.58866e-05	0.000474432	2.71083
ENSMUSG00000058440	0.373177	5.83367	5.42878	1.58966e-05	0.000474432	2.37864
ENSMUSG00000045658	2.25727	-1.42765	5.42677	1.59751e-05	0.000475226	3.10151
ENSMUSG00000043190	-0.926416	2.99302	-5.42644	1.59882e-05	0.000475226	2.87344
ENSMUSG00000073176	-1.98124	-0.616144	-5.42398	1.6085e-05	0.000476662	2.96751
ENSMUSG00000035351	-0.763849	2.66224	-5.42356	1.61017e-05	0.000476662	2.85862
ENSMUSG00000034379	-0.826265	3.37473	-5.41812	1.63185e-05	0.000482103	2.77847
ENSMUSG00000042724	0.928307	3.80024	5.41686	1.63691e-05	0.000482623	2.57571
ENSMUSG00000021375	0.860409	1.79535	5.41026	1.66372e-05	0.000487979	2.76691
ENSMUSG00000000078	0.461019	7.50156	5.40999	1.66482e-05	0.000487979	2.29935
ENSMUSG00000034402	2.6648	-1.96909	5.40993	1.66508e-05	0.000487979	3.03659
ENSMUSG00000027176	-0.527008	5.17396	-5.40897	1.66902e-05	0.000488155	2.41944
ENSMUSG00000056498	-0.647822	4.22628	-5.40588	1.68175e-05	0.000490112	2.5484
ENSMUSG00000063108	-0.668362	5.92672	-5.40572	1.68241e-05	0.000490112	2.33169
ENSMUSG00000032221	0.617492	0.965388	5.40421	1.68865e-05	0.00049095	2.57356
ENSMUSG00000067424	-0.849196	2.47238	-5.40089	1.70252e-05	0.000494001	2.87121
ENSMUSG00000034330	1.179	2.42183	5.39786	1.71527e-05	0.000496714	2.81355
ENSMUSG00000026764	1.15444	3.51918	5.39551	1.72519e-05	0.000498601	2.72724
ENSMUSG00000020287	-0.641664	3.66938	-5.39125	1.74339e-05	0.000502101	2.59696
ENSMUSG00000039981	0.364518	6.25856	5.39062	1.74608e-05	0.000502101	2.25783
ENSMUSG00000043015	-0.641583	5.8229	-5.39027	1.7476e-05	0.000502101	2.3337
ENSMUSG00000036768	-2.01716	0.719993	-5.38666	1.76321e-05	0.000504883	3.01772
ENSMUSG00000086335	-2.7344	-0.226097	-5.38643	1.76419e-05	0.000504883	2.80471
ENSMUSG00000099241	4.42656	2.63123	5.38169	1.78488e-05	0.000509806	2.94249
ENSMUSG00000035620	0.419401	5.29637	5.37812	1.80066e-05	0.000512792	2.29889
ENSMUSG00000020668	0.516472	4.90436	5.37774	1.80235e-05	0.000512792	2.33285
ENSMUSG00000078907	-1.77086	0.538847	-5.37375	1.82012e-05	0.000516845	2.95807
ENSMUSG00000051978	0.710331	3.97614	5.3717	1.82934e-05	0.000518455	2.45598
ENSMUSG00000035161	0.610979	5.76264	5.36607	1.85488e-05	0.000524675	2.21337
ENSMUSG00000000275	-0.471115	7.19882	-5.36395	1.86459e-05	0.000524933	2.18437
ENSMUSG00000043740	1.20865	4.3399	5.36373	1.86562e-05	0.000524933	2.38099
ENSMUSG00000017756	-0.44749	9.22582	-5.36352	1.86655e-05	0.000524933	2.22491
ENSMUSG00000046157	-0.466209	7.08253	-5.35939	1.88568e-05	0.000529295	2.17328
ENSMUSG00000022091	1.17554	1.31089	5.35484	1.90692e-05	0.000534231	2.86019
ENSMUSG00000029817	0.521481	6.46608	5.35159	1.92227e-05	0.000537438	2.16183
ENSMUSG00000039084	-1.83744	0.249423	-5.35086	1.92572e-05	0.000537438	2.92357
ENSMUSG00000005883	-0.980727	3.66421	-5.34942	1.93258e-05	0.000538324	2.63503
ENSMUSG00000034473	-0.83602	2.98624	-5.34358	1.96056e-05	0.000545044	2.62706
ENSMUSG00000029687	-0.578773	4.36705	-5.34284	1.96415e-05	0.000545044	2.36717
ENSMUSG00000024370	-0.347971	6.03925	-5.34172	1.96959e-05	0.000545174	2.16082
ENSMUSG00000027981	-0.851661	5.32479	-5.34121	1.97208e-05	0.000545174	2.25342
ENSMUSG00000045817	0.782047	9.23649	5.33769	1.98923e-05	0.000547916	2.16127
ENSMUSG00000084826	-1.10873	2.12727	-5.33764	1.98949e-05	0.000547916	2.81845
ENSMUSG00000018537	1.51027	2.07956	5.33283	2.01325e-05	0.000553418	2.85832
ENSMUSG00000035505	-0.598746	3.46211	-5.32311	2.06205e-05	0.000565768	2.54335
ENSMUSG00000016552	0.756198	3.8988	5.32008	2.07754e-05	0.000568949	2.33998
ENSMUSG00000045746	-1.41417	0.795108	-5.31642	2.09636e-05	0.000572932	2.79738
ENSMUSG00000037921	-0.802188	5.29458	-5.31574	2.09992e-05	0.000572932	2.15051
ENSMUSG00000072825	0.833732	3.77107	5.31424	2.1077e-05	0.000573986	2.2995
ENSMUSG00000026029	-0.428361	7.21883	-5.31235	2.11755e-05	0.000575596	2.05619
ENSMUSG00000085028	-0.584143	6.64553	-5.30212	2.17165e-05	0.000589207	2.04737
ENSMUSG00000096932	-2.80835	-1.73614	-5.30039	2.18098e-05	0.000590642	2.16699
ENSMUSG00000023048	0.623206	5.40115	5.29864	2.19041e-05	0.000592099	2.09517
ENSMUSG00000097113	0.797863	2.42707	5.29747	2.19671e-05	0.000592706	2.5398
ENSMUSG00000027843	0.43007	7.81828	5.29531	2.20847e-05	0.000594781	2.02541
ENSMUSG00000007613	-0.494703	5.39609	-5.29359	2.2179e-05	0.000596223	2.08648
ENSMUSG00000047446	0.442728	5.13576	5.29215	2.22576e-05	0.000596738	2.10235
ENSMUSG00000021037	0.90713	6.27547	5.29175	2.22798e-05	0.000596738	2.00752
ENSMUSG00000021270	1.13051	8.49427	5.29088	2.23274e-05	0.000596921	2.03814
ENSMUSG00000020941	0.376099	6.72543	5.28579	2.26102e-05	0.000602579	1.9898
ENSMUSG00000096802	4.75817	0.130362	5.28549	2.26266e-05	0.000602579	2.3491
ENSMUSG00000022074	0.715141	4.76481	5.28485	2.26626e-05	0.000602579	2.14235
ENSMUSG00000019920	-0.528504	7.06667	-5.28017	2.2926e-05	0.000608476	1.97734
ENSMUSG00000038304	-0.589025	3.82682	-5.2786	2.3015e-05	0.00060973	2.29773
ENSMUSG00000035235	0.739536	2.53993	5.27641	2.31401e-05	0.000611935	2.48902
ENSMUSG00000025207	-1.33997	2.40951	-5.27411	2.32715e-05	0.0006143	2.67091
ENSMUSG00000025980	0.726514	7.5624	5.27057	2.34757e-05	0.000618139	1.95914
ENSMUSG00000043183	0.652328	4.93444	5.26943	2.35425e-05	0.000618139	2.05896
ENSMUSG00000020823	0.464197	5.2321	5.2694	2.35437e-05	0.000618139	2.01597
ENSMUSG00000043833	-1.02128	3.30578	-5.26389	2.38666e-05	0.000625494	2.46145
ENSMUSG00000021023	-0.732974	3.17015	-5.25909	2.41514e-05	0.000631824	2.35455
ENSMUSG00000042073	0.655737	0.529703	5.25559	2.43612e-05	0.000636176	2.27725
ENSMUSG00000027628	-0.551254	4.70228	-5.25257	2.45438e-05	0.000639802	2.06696
ENSMUSG00000038267	-1.94979	0.0447589	-5.24948	2.47316e-05	0.000642817	2.68253
ENSMUSG00000083621	-2.61362	0.336465	-5.24922	2.47474e-05	0.000642817	2.701
ENSMUSG00000030357	0.743778	6.89772	5.24687	2.4892e-05	0.000645428	1.89217
ENSMUSG00000073374	-0.774223	2.44285	-5.24575	2.49606e-05	0.000646061	2.39756
ENSMUSG00000020610	-0.458588	4.97187	-5.24255	2.51588e-05	0.000649905	2.04129
ENSMUSG00000008348	0.599652	9.13717	5.2409	2.52616e-05	0.000649905	1.92357
ENSMUSG00000097008	2.04616	-0.497371	5.24074	2.52719e-05	0.000649905	2.65236
ENSMUSG00000054920	0.904932	3.98751	5.2405	2.52869e-05	0.000649905	2.18044
ENSMUSG00000024052	0.607814	5.45133	5.23448	2.56662e-05	0.000658496	1.92809
ENSMUSG00000031770	-0.518042	5.94467	-5.22754	2.61105e-05	0.000668722	1.87633
ENSMUSG00000062248	1.1556	1.71027	5.22491	2.6281e-05	0.00067191	2.42604
ENSMUSG00000043140	-0.414359	5.10383	-5.2236	2.63658e-05	0.000672904	1.94968
ENSMUSG00000025757	1.09803	4.92798	5.21845	2.67039e-05	0.000680344	1.9179
ENSMUSG00000097294	-0.8837	2.33274	-5.21743	2.67712e-05	0.000680874	2.33984
ENSMUSG00000062761	-0.555063	5.56435	-5.21301	2.70655e-05	0.000687163	1.90297
ENSMUSG00000085913	1.09348	2.25088	5.211	2.72009e-05	0.000689405	2.4062
ENSMUSG00000019982	-1.04927	4.55691	-5.21028	2.72494e-05	0.000689439	2.00433
ENSMUSG00000009731	1.2268	0.175727	5.20648	2.75066e-05	0.000694175	2.59476
ENSMUSG00000042506	-0.407105	6.23174	-5.20611	2.75315e-05	0.000694175	1.80914
ENSMUSG00000062944	-1.29674	2.30266	-5.20153	2.7846e-05	0.000700894	2.44612
ENSMUSG00000024083	-0.570162	5.79619	-5.20018	2.79386e-05	0.000702017	1.83398
ENSMUSG00000041303	-0.667416	4.59116	-5.19767	2.8113e-05	0.00070335	1.95819
ENSMUSG00000039512	0.980549	3.15721	5.1974	2.81318e-05	0.00070335	2.19073
ENSMUSG00000046417	1.92989	-1.3757	5.19734	2.81359e-05	0.00070335	2.44268
ENSMUSG00000046550	-0.816763	1.7005	-5.19573	2.8248e-05	0.000704947	2.4647
ENSMUSG00000002297	0.736916	4.79802	5.19383	2.83816e-05	0.000707073	1.87413
ENSMUSG00000021902	-0.610621	3.49319	-5.18909	2.87162e-05	0.000714193	2.15584
ENSMUSG00000025359	1.01097	3.64914	5.18771	2.88148e-05	0.000715429	2.12073
ENSMUSG00000025915	-0.396488	4.85189	-5.18633	2.89133e-05	0.000715819	1.83785
ENSMUSG00000097230	1.09325	4.03392	5.18612	2.89284e-05	0.000715819	2.07622
ENSMUSG00000005615	0.666163	3.58728	5.18122	2.92813e-05	0.000722636	2.0282
ENSMUSG00000027347	-0.568941	8.70451	-5.18093	2.93027e-05	0.000722636	1.75249
ENSMUSG00000024206	0.650136	4.00409	5.17861	2.94711e-05	0.00072467	2.04857
ENSMUSG00000042474	1.98471	1.62645	5.17792	2.95214e-05	0.00072467	2.4777
ENSMUSG00000055538	-1.55187	1.47988	-5.17775	2.95339e-05	0.00072467	2.50861
ENSMUSG00000062082	1.05659	2.29925	5.17355	2.98427e-05	0.000731021	2.17606
ENSMUSG00000029771	1.67498	0.852356	5.16961	3.01356e-05	0.000736566	2.51503
ENSMUSG00000052013	-0.560786	6.02698	-5.16915	3.01698e-05	0.000736566	1.72234
ENSMUSG00000021895	-0.505081	7.62127	-5.16549	3.04445e-05	0.000741487	1.69613
ENSMUSG00000040410	-0.645738	3.9985	-5.16512	3.04728e-05	0.000741487	2.01631
ENSMUSG00000027506	0.636677	4.7302	5.16288	3.06421e-05	0.000744369	1.81416
ENSMUSG00000054720	-0.530657	7.33463	-5.1621	3.07017e-05	0.000744499	1.6835
ENSMUSG00000045980	0.424868	4.23749	5.16101	3.07845e-05	0.000744499	1.86347
ENSMUSG00000034227	3.34761	-1.57189	5.1608	3.08002e-05	0.000744499	2.05818
ENSMUSG00000097571	-1.11497	2.43132	-5.16001	3.0861e-05	0.000744738	2.32155
ENSMUSG00000097061	-0.771537	3.69583	-5.1573	3.10684e-05	0.000748507	2.12449
ENSMUSG00000038256	-0.750137	5.54945	-5.15609	3.11616e-05	0.000749519	1.77
ENSMUSG00000060441	-0.70209	5.86203	-5.15402	3.13226e-05	0.000752153	1.73138
ENSMUSG00000055723	-0.583133	6.67963	-5.15024	3.16168e-05	0.000757974	1.65606
ENSMUSG00000025227	1.37232	0.73543	5.14815	3.17812e-05	0.000760668	2.41426
ENSMUSG00000042997	-0.601166	5.11746	-5.14562	3.19806e-05	0.00076397	1.76637
ENSMUSG00000059866	0.628856	3.35871	5.14489	3.20386e-05	0.00076397	2.02758
ENSMUSG00000020134	-0.419122	8.48793	-5.14442	3.20759e-05	0.00076397	1.65913
ENSMUSG00000039908	0.64836	5.37822	5.14028	3.24068e-05	0.000770597	1.71758
ENSMUSG00000026656	2.95755	-0.509979	5.1368	3.2688e-05	0.000776023	2.38795
ENSMUSG00000030850	-0.354083	5.67475	-5.12908	3.33193e-05	0.000789727	1.65327
ENSMUSG00000028270	0.582855	6.64695	5.12836	3.33789e-05	0.000789858	1.59716
ENSMUSG00000034160	-0.586475	9.44308	-5.12184	3.3923e-05	0.000801438	1.62173
ENSMUSG00000030653	0.627565	7.53734	5.12066	3.40223e-05	0.000802486	1.59547
ENSMUSG00000039824	-1.71462	0.450149	-5.11914	3.41509e-05	0.000804187	2.39528
ENSMUSG00000037638	0.668828	2.872	5.11818	3.42324e-05	0.000804187	1.94069
ENSMUSG00000079605	-0.580093	5.51026	-5.11786	3.42593e-05	0.000804187	1.6478
ENSMUSG00000040591	0.714725	3.26054	5.11639	3.43849e-05	0.000805842	1.95983
ENSMUSG00000039463	-0.778471	6.35737	-5.11332	3.46472e-05	0.000810689	1.59099
ENSMUSG00000025464	-0.733119	3.0119	-5.11162	3.47942e-05	0.000812828	2.0942
ENSMUSG00000041935	-0.538292	7.10465	-5.10601	3.52811e-05	0.000822888	1.5446
ENSMUSG00000053091	0.443825	3.74214	5.10241	3.55978e-05	0.000828952	1.82408
ENSMUSG00000070407	-0.350965	5.15265	-5.10127	3.56989e-05	0.000829985	1.61969
ENSMUSG00000097865	3.19392	-2.45561	5.09742	3.6041e-05	0.000836609	1.96709
ENSMUSG00000038127	0.640609	5.69098	5.09644	3.61289e-05	0.00083732	1.58063
ENSMUSG00000023186	0.476184	4.32874	5.09405	3.63443e-05	0.000840979	1.62958
ENSMUSG00000097234	0.962696	1.68679	5.09257	3.64781e-05	0.000842743	2.20192
ENSMUSG00000097160	2.74356	-0.126574	5.08674	3.70093e-05	0.000853665	2.31774
ENSMUSG00000097445	-2.5576	0.425134	-5.08583	3.70934e-05	0.000854258	2.26253
ENSMUSG00000009739	0.48595	6.18772	5.08406	3.72565e-05	0.000856665	1.50548
ENSMUSG00000021453	1.27104	0.699555	5.08116	3.75256e-05	0.000861498	2.27197
ENSMUSG00000029580	-0.570443	11.9617	-5.07617	3.79934e-05	0.000870872	1.6185
ENSMUSG00000047193	0.778739	3.58765	5.07495	3.81086e-05	0.000872145	1.74004
ENSMUSG00000036138	-0.489916	6.32585	-5.0728	3.83122e-05	0.000875433	1.48184
ENSMUSG00000017774	0.682113	4.84483	5.06942	3.86353e-05	0.000881439	1.58578
ENSMUSG00000030701	2.55227	-1.41454	5.06767	3.88033e-05	0.000883792	2.11857
ENSMUSG00000031983	-0.580394	3.40278	-5.06707	3.88612e-05	0.000883792	1.87615
ENSMUSG00000030428	-1.9761	-0.129098	-5.06647	3.89197e-05	0.000883792	2.2451
ENSMUSG00000014039	0.534435	5.10582	5.0658	3.89843e-05	0.000883886	1.52939
ENSMUSG00000098702	-0.847612	2.71411	-5.06312	3.92442e-05	0.000888402	2.02842
ENSMUSG00000024014	0.844764	6.57244	5.06161	3.93916e-05	0.000890361	1.44244
ENSMUSG00000074634	1.3807	1.41384	5.05999	3.95506e-05	0.000892574	2.07091
ENSMUSG00000020717	-0.479243	7.98721	-5.05933	3.96151e-05	0.000892651	1.42764
ENSMUSG00000055809	2.28543	-0.799565	5.05428	4.01154e-05	0.000902535	2.24411
ENSMUSG00000032333	-0.66109	4.88127	-5.05303	4.02405e-05	0.000903958	1.58962
ENSMUSG00000038344	0.62182	5.69069	5.05153	4.03906e-05	0.000905938	1.46635
ENSMUSG00000010609	0.456928	4.79184	5.0482	4.07262e-05	0.000912068	1.53923
ENSMUSG00000032252	-0.531363	4.07982	-5.04488	4.10635e-05	0.000917096	1.69125
ENSMUSG00000059839	-0.571565	5.1613	-5.04475	4.10762e-05	0.000917096	1.50103
ENSMUSG00000001542	1.32723	1.85371	5.03969	4.15965e-05	0.000926826	2.10882
ENSMUSG00000024277	0.443352	4.67767	5.03837	4.17322e-05	0.000926826	1.49276
ENSMUSG00000028173	-0.503295	5.00144	-5.03816	4.17549e-05	0.000926826	1.49402
ENSMUSG00000031200	-0.854839	4.36564	-5.03805	4.17655e-05	0.000926826	1.65397
ENSMUSG00000036452	0.664765	5.43762	5.03548	4.20338e-05	0.000931366	1.4147
ENSMUSG00000008129	-0.968014	2.36683	-5.03448	4.21382e-05	0.000931585	1.98709
ENSMUSG00000034278	-0.59899	3.01144	-5.03405	4.21827e-05	0.000931585	1.89575
ENSMUSG00000027770	-0.554516	6.30547	-5.03259	4.23364e-05	0.000931585	1.38284
ENSMUSG00000047090	-0.562991	3.52499	-5.03205	4.23936e-05	0.000931585	1.80897
ENSMUSG00000062031	-0.658615	4.79171	-5.03188	4.24111e-05	0.000931585	1.53724
ENSMUSG00000047909	-0.533748	6.50146	-5.03174	4.24258e-05	0.000931585	1.38682
ENSMUSG00000009907	-0.388741	6.80798	-5.02032	4.36469e-05	0.00095696	1.33151
ENSMUSG00000032512	-0.333372	6.17071	-5.01535	4.41902e-05	0.000967422	1.34128
ENSMUSG00000038540	-0.600756	2.80033	-5.00612	4.52149e-05	0.000988375	1.80026
ENSMUSG00000030291	0.684019	6.58141	5.00366	4.54928e-05	0.000992966	1.28758
ENSMUSG00000027630	-0.329314	7.04956	-5.00138	4.57514e-05	0.000997121	1.28252
ENSMUSG00000040365	0.365228	5.54084	5.00043	4.58595e-05	0.00099799	1.34562
ENSMUSG00000037138	-0.734563	6.65793	-4.99809	4.61272e-05	0.00100233	1.28012
ENSMUSG00000002668	-0.395448	7.69248	-4.99742	4.62046e-05	0.00100252	1.27313
ENSMUSG00000070291	1.95648	2.35702	4.99663	4.62951e-05	0.00100299	2.03019
ENSMUSG00000025758	-0.576319	3.6046	-4.99389	4.66114e-05	0.00100816	1.66066
ENSMUSG00000049191	1.97956	-0.00342668	4.99337	4.66715e-05	0.00100816	2.11045
ENSMUSG00000038866	0.500171	6.5069	4.99154	4.68844e-05	0.00101127	1.26023
ENSMUSG00000026070	0.497319	7.37213	4.98868	4.72189e-05	0.00101698	1.24922
ENSMUSG00000029101	0.92139	1.7392	4.9849	4.76656e-05	0.00102509	1.90665
ENSMUSG00000053925	-0.877165	1.94969	-4.98198	4.80125e-05	0.00103104	1.87884
ENSMUSG00000048878	0.434515	5.93855	4.98056	4.81834e-05	0.00103319	1.25912
ENSMUSG00000087327	-3.11697	-1.67336	-4.97929	4.83351e-05	0.00103492	1.58535
ENSMUSG00000006356	1.7663	0.712521	4.97693	4.86194e-05	0.00103949	2.01446
ENSMUSG00000046794	-1.06539	2.89591	-4.97295	4.91036e-05	0.00104831	1.81709
ENSMUSG00000022408	-1.33531	1.33943	-4.97169	4.92578e-05	0.00105007	1.98109
ENSMUSG00000097248	-1.83744	1.24124	-4.96681	4.98601e-05	0.00106113	1.99762
ENSMUSG00000050122	0.88717	0.586927	4.96631	4.99218e-05	0.00106113	1.92665
ENSMUSG00000037419	1.02193	3.6731	4.96523	5.00561e-05	0.00106244	1.65764
ENSMUSG00000015468	-2.27117	0.632896	-4.95736	5.10463e-05	0.00108189	2.02767
ENSMUSG00000055745	-0.761128	3.70658	-4.95431	5.14345e-05	0.00108853	1.50272
ENSMUSG00000038020	-1.64196	0.0667165	-4.95326	5.15692e-05	0.00108981	2.01587
ENSMUSG00000030243	-0.335643	6.51194	-4.94868	5.21609e-05	0.00110072	1.1645
ENSMUSG00000053581	0.543494	4.5119	4.94541	5.25869e-05	0.00110811	1.31712
ENSMUSG00000037003	2.68788	-1.20576	4.94443	5.2716e-05	0.00110924	1.84195
ENSMUSG00000038028	0.421268	4.15576	4.93216	5.435e-05	0.00114198	1.2894
ENSMUSG00000055926	-1.61932	1.22614	-4.92829	5.48766e-05	0.00115138	1.94702
ENSMUSG00000097750	-0.991187	1.76445	-4.92652	5.51185e-05	0.0011548	1.89824
ENSMUSG00000032690	-1.68999	2.77575	-4.92491	5.534e-05	0.00115779	1.61685
ENSMUSG00000020770	-0.396584	5.77953	-4.92026	5.59852e-05	0.00116961	1.14092
ENSMUSG00000030337	-0.572229	6.741	-4.91716	5.64193e-05	0.0011744	1.08438
ENSMUSG00000027854	-0.337532	6.47829	-4.91696	5.64464e-05	0.0011744	1.08473
ENSMUSG00000062040	-0.818951	3.27528	-4.9169	5.64556e-05	0.0011744	1.58772
ENSMUSG00000026463	0.999669	4.53342	4.91458	5.67828e-05	0.00117953	1.4647
ENSMUSG00000026556	-1.51462	1.68835	-4.91139	5.7236e-05	0.00118726	1.84114
ENSMUSG00000018800	2.49922	0.135386	4.90877	5.761e-05	0.00119333	1.87626
ENSMUSG00000021716	-0.618179	3.98022	-4.90648	5.79402e-05	0.00119736	1.45898
ENSMUSG00000014226	1.09482	5.92168	4.90628	5.79682e-05	0.00119736	1.05768
ENSMUSG00000097536	-1.18306	2.98181	-4.90144	5.86713e-05	0.00120801	1.62407
ENSMUSG00000086725	-0.72414	2.79862	-4.90126	5.86988e-05	0.00120801	1.59148
ENSMUSG00000060477	0.530111	4.10116	4.90103	5.87319e-05	0.00120801	1.28047
ENSMUSG00000037343	-0.40451	6.04095	-4.89793	5.91871e-05	0.00121534	1.05499
ENSMUSG00000086266	2.42089	-0.753273	4.89747	5.92545e-05	0.00121534	1.71082
ENSMUSG00000084957	0.474587	4.32459	4.89543	5.95566e-05	0.00121983	1.23963
ENSMUSG00000020649	-1.47207	1.29303	-4.89443	5.97063e-05	0.00122085	1.79649
ENSMUSG00000041328	0.493429	7.57224	4.89397	5.97737e-05	0.00122085	1.01727
ENSMUSG00000045690	-0.579466	4.12612	-4.89226	6.00292e-05	0.00122436	1.2831
ENSMUSG00000021981	-0.380406	5.7977	-4.88822	6.06373e-05	0.00123504	1.05541
ENSMUSG00000043831	-0.604192	2.92801	-4.8866	6.08816e-05	0.00123829	1.53217
ENSMUSG00000069265	2.30951	-1.68006	4.88531	6.10786e-05	0.00123945	1.74465
ENSMUSG00000028010	0.561209	4.71433	4.88511	6.11082e-05	0.00123945	1.12969
ENSMUSG00000070814	-0.694083	3.14195	-4.88137	6.16803e-05	0.00124932	1.48851
ENSMUSG00000042029	-1.29071	2.37008	-4.87998	6.18942e-05	0.00125192	1.67424
ENSMUSG00000026864	0.358662	8.30168	4.87922	6.20115e-05	0.00125256	0.992267
ENSMUSG00000027075	-1.49789	0.292587	-4.87785	6.22236e-05	0.00125511	1.84275
ENSMUSG00000038976	0.295745	8.14921	4.87283	6.30068e-05	0.00126916	0.974612
ENSMUSG00000029602	-0.73855	4.21162	-4.87198	6.31414e-05	0.00127012	1.25962
ENSMUSG00000022708	0.918085	6.62627	4.86881	6.36413e-05	0.00127842	0.953555
ENSMUSG00000050910	1.00274	1.36303	4.86713	6.39088e-05	0.00128203	1.64018
ENSMUSG00000034161	-2.51384	-1.22359	-4.86113	6.48714e-05	0.00129956	1.57481
ENSMUSG00000020601	-0.361006	7.29121	-4.85968	6.51061e-05	0.00130248	0.929103
ENSMUSG00000043795	-1.08267	4.66458	-4.85643	6.56362e-05	0.00131129	1.2163
ENSMUSG00000086429	-0.988212	3.51053	-4.85382	6.60657e-05	0.00131783	1.3388
ENSMUSG00000074629	-1.06281	2.03241	-4.85334	6.61441e-05	0.00131783	1.64418
ENSMUSG00000067577	-0.997671	3.29436	-4.85042	6.66274e-05	0.00132566	1.50026
ENSMUSG00000028410	0.978381	8.28153	4.8497	6.67468e-05	0.00132623	0.931837
ENSMUSG00000043592	-0.517039	3.22676	-4.84903	6.68592e-05	0.00132643	1.23535
ENSMUSG00000037759	-1.69925	1.59171	-4.84855	6.69383e-05	0.00132643	1.74524
ENSMUSG00000037579	-1.48238	2.11706	-4.8457	6.74154e-05	0.00133408	1.64581
ENSMUSG00000045193	-0.729188	6.59376	-4.84515	6.75081e-05	0.00133411	0.934894
ENSMUSG00000086953	2.39251	-2.07854	4.84387	6.77245e-05	0.00133658	1.55045
ENSMUSG00000024998	-0.971379	1.33176	-4.84302	6.78675e-05	0.00133689	1.73862
ENSMUSG00000057606	-0.997493	1.21251	-4.84254	6.79493e-05	0.00133689	1.68049
ENSMUSG00000037010	-1.98629	-0.367402	-4.84215	6.80148e-05	0.00133689	1.70928
ENSMUSG00000050088	-0.478123	4.8772	-4.84098	6.82145e-05	0.00133727	1.03732
ENSMUSG00000061458	-0.508169	4.83329	-4.84046	6.83029e-05	0.00133727	1.02669
ENSMUSG00000031264	1.77	0.217307	4.84015	6.8355e-05	0.00133727	1.75593
ENSMUSG00000027806	0.448059	5.2975	4.83989	6.83998e-05	0.00133727	0.951464
ENSMUSG00000090394	-0.3626	7.48571	-4.83885	6.85776e-05	0.00133896	0.878711
ENSMUSG00000024960	0.627552	3.55926	4.8379	6.87394e-05	0.00134033	1.25081
ENSMUSG00000078853	0.466156	7.65546	4.83595	6.90754e-05	0.00134509	0.872532
ENSMUSG00000023988	0.334443	5.27706	4.83529	6.91887e-05	0.0013455	0.938925
ENSMUSG00000031668	0.356277	5.2463	4.83406	6.94015e-05	0.00134784	0.940416
ENSMUSG00000027655	-0.410744	4.79358	-4.82811	7.04385e-05	0.00136617	1.02364
ENSMUSG00000031504	0.936583	3.04397	4.8247	7.10404e-05	0.00137445	1.23899
ENSMUSG00000044167	-0.3897	8.57429	-4.82463	7.10532e-05	0.00137445	0.860382
ENSMUSG00000030342	0.430175	5.1146	4.8235	7.12541e-05	0.00137651	0.936992
ENSMUSG00000097944	-0.799059	2.32717	-4.81851	7.21467e-05	0.00139139	1.48275
ENSMUSG00000042784	2.83174	-1.97999	4.81813	7.22146e-05	0.00139139	1.45126
ENSMUSG00000093514	0.876572	5.13127	4.81693	7.24308e-05	0.00139372	0.874994
ENSMUSG00000004895	0.463904	5.75369	4.81465	7.28449e-05	0.00139825	0.849664
ENSMUSG00000020385	-0.440195	6.89089	-4.81412	7.29399e-05	0.00139825	0.820109
ENSMUSG00000041840	-0.724577	3.08875	-4.81335	7.30802e-05	0.00139825	1.29362
ENSMUSG00000038738	3.31026	0.320056	4.81309	7.31277e-05	0.00139825	1.69519
ENSMUSG00000040699	-0.54419	9.41473	-4.813	7.31444e-05	0.00139825	0.857601
ENSMUSG00000021179	-0.745699	5.25471	-4.80788	7.40853e-05	0.00141439	0.919434
ENSMUSG00000039357	-0.467585	4.62197	-4.80386	7.4831e-05	0.00142676	0.940965
ENSMUSG00000046836	-0.277812	6.11783	-4.80306	7.4981e-05	0.00142776	0.810504
ENSMUSG00000061731	0.374384	4.52605	4.80157	7.52609e-05	0.00143123	0.9654
ENSMUSG00000033478	-0.322688	6.10896	-4.79798	7.59383e-05	0.00144224	0.783938
ENSMUSG00000062591	-0.744685	2.28149	-4.79701	7.61217e-05	0.00144384	1.45644
ENSMUSG00000030577	1.90329	3.14481	4.7952	7.64667e-05	0.0014458	1.37313
ENSMUSG00000029053	0.352281	4.72039	4.79514	7.64768e-05	0.0014458	0.876001
ENSMUSG00000034518	-0.409865	5.23075	-4.79491	7.65212e-05	0.0014458	0.885543
ENSMUSG00000036469	1.70177	0.405735	4.79257	7.69699e-05	0.00145154	1.63409
ENSMUSG00000016940	-0.411111	5.85398	-4.79206	7.70677e-05	0.00145154	0.818714
ENSMUSG00000039046	0.498746	5.00787	4.79177	7.71231e-05	0.00145154	0.85917
ENSMUSG00000032640	0.444044	4.97401	4.78965	7.75321e-05	0.00145736	0.870274
ENSMUSG00000035770	-0.335802	6.27719	-4.7884	7.77754e-05	0.00146006	0.772858
ENSMUSG00000097567	-1.50762	-1.83206	-4.78747	7.7955e-05	0.00146156	1.59375
ENSMUSG00000039680	1.05726	2.98003	4.78126	7.91734e-05	0.0014825	1.10872
ENSMUSG00000028551	-1.19279	-0.697145	-4.77924	7.95734e-05	0.00148808	1.50231
ENSMUSG00000017314	3.91263	-1.6244	4.77638	8.01441e-05	0.00149684	1.3262
ENSMUSG00000036580	-0.415516	4.8135	-4.77569	8.02816e-05	0.0014975	0.871071
ENSMUSG00000042055	-0.603432	5.60282	-4.7737	8.06801e-05	0.00150112	0.782652
ENSMUSG00000020840	-0.350319	5.35185	-4.7737	8.06812e-05	0.00150112	0.780192
ENSMUSG00000097760	-2.5582	-0.852824	-4.76713	8.20154e-05	0.00152401	1.48216
ENSMUSG00000003273	1.6767	1.38982	4.76616	8.22139e-05	0.00152576	1.58661
ENSMUSG00000089901	-0.634968	4.51856	-4.76472	8.25103e-05	0.00152932	0.83693
ENSMUSG00000044807	-0.599774	5.06372	-4.76346	8.27691e-05	0.00153217	0.890218
ENSMUSG00000069920	-0.733911	1.84655	-4.75986	8.35174e-05	0.00154407	1.31513
ENSMUSG00000032320	-0.478763	4.44408	-4.75931	8.36311e-05	0.00154422	0.82994
ENSMUSG00000020474	-0.463608	5.36641	-4.75574	8.43815e-05	0.00155611	0.81578
ENSMUSG00000030528	-0.756312	4.10344	-4.75299	8.49619e-05	0.00156484	0.961178
ENSMUSG00000023036	0.667893	2.78504	4.75226	8.51174e-05	0.00156573	1.12263
ENSMUSG00000086924	-2.21724	0.923361	-4.75135	8.53107e-05	0.00156621	1.55031
ENSMUSG00000092260	-0.771677	2.68176	-4.75113	8.53578e-05	0.00156621	1.19811
ENSMUSG00000038056	0.848828	8.49662	4.75055	8.54817e-05	0.00156652	0.686795
ENSMUSG00000015790	-0.425008	5.13676	-4.74994	8.56108e-05	0.00156691	0.770202
ENSMUSG00000028078	-1.08386	2.66245	-4.74944	8.57174e-05	0.00156691	1.46764
ENSMUSG00000029752	2.84373	-1.98067	4.7477	8.60913e-05	0.00157178	1.34123
ENSMUSG00000025026	-0.449918	9.06373	-4.73899	8.79837e-05	0.00160433	0.661848
ENSMUSG00000020650	-0.513429	5.0682	-4.7373	8.83569e-05	0.00160913	0.737027
ENSMUSG00000090709	-1.3584	-1.13362	-4.73184	8.95697e-05	0.00162919	1.47553
ENSMUSG00000072568	0.45655	5.5908	4.73115	8.97235e-05	0.00162996	0.669381
ENSMUSG00000022911	0.481571	4.14185	4.72924	9.01526e-05	0.00163572	0.843918
ENSMUSG00000022041	3.41172	0.101962	4.72762	9.05176e-05	0.00164031	1.4823
ENSMUSG00000038576	-2.01321	0.945213	-4.72533	9.10373e-05	0.00164768	1.45559
ENSMUSG00000032203	-1.08826	3.74547	-4.72066	9.21061e-05	0.00166384	1.02504
ENSMUSG00000061119	0.431239	3.94704	4.72043	9.21574e-05	0.00166384	0.785835
ENSMUSG00000053175	0.839278	4.362	4.71886	9.252e-05	0.00166744	0.782272
ENSMUSG00000036450	-0.4569	6.3514	-4.71858	9.25848e-05	0.00166744	0.59199
ENSMUSG00000074075	2.48274	-1.78133	4.7153	9.3346e-05	0.00167908	1.2664
ENSMUSG00000097785	-1.04502	0.543978	-4.71454	9.35229e-05	0.0016802	1.31843
ENSMUSG00000039782	0.581227	3.58018	4.71107	9.43374e-05	0.00168983	0.910462
ENSMUSG00000047632	-0.774703	1.61378	-4.71098	9.43586e-05	0.00168983	1.16108
ENSMUSG00000035824	-0.461333	5.94331	-4.71078	9.4406e-05	0.00168983	0.6052
ENSMUSG00000030189	0.711474	4.11518	4.70818	9.50217e-05	0.00169718	0.84976
ENSMUSG00000036257	-0.521332	5.07882	-4.70807	9.50483e-05	0.00169718	0.655736
ENSMUSG00000086962	3.67683	-1.73114	4.70746	9.51926e-05	0.00169768	1.10839
ENSMUSG00000097574	-0.980106	0.213321	-4.7052	9.5731e-05	0.0017052	1.24906
ENSMUSG00000033470	1.19158	1.65812	4.70055	9.68492e-05	0.00172302	1.21671
ENSMUSG00000057497	-0.541269	3.90344	-4.69883	9.72669e-05	0.00172835	0.845273
ENSMUSG00000052271	1.77404	0.663612	4.69574	9.802e-05	0.00173901	1.40423
ENSMUSG00000078201	-0.741093	2.38312	-4.6954	9.81046e-05	0.00173901	1.14498
ENSMUSG00000056602	0.620234	5.35034	4.69398	9.84518e-05	0.00174305	0.567811
ENSMUSG00000042763	0.811695	2.87261	4.69025	9.93754e-05	0.00175727	1.09268
ENSMUSG00000028874	-0.994872	1.20883	-4.68932	9.96061e-05	0.0017575	1.25857
ENSMUSG00000042579	-0.734227	3.75016	-4.68923	9.96285e-05	0.0017575	0.8427
ENSMUSG00000048578	-0.471028	8.07797	-4.68785	9.99717e-05	0.00176143	0.510374
ENSMUSG00000056290	-0.417741	9.82559	-4.68645	0.000100322	0.00176547	0.552137
ENSMUSG00000004568	-0.440348	8.86047	-4.68541	0.000100583	0.00176794	0.523528
ENSMUSG00000057963	0.402651	5.65829	4.68432	0.000100857	0.00177062	0.543063
ENSMUSG00000035473	0.624412	2.47657	4.68187	0.000101477	0.00177798	0.907875
ENSMUSG00000090942	2.27629	0.407062	4.6817	0.000101519	0.00177798	1.37929
ENSMUSG00000028890	0.444819	5.50105	4.67923	0.000102149	0.00178687	0.525872
ENSMUSG00000038416	-0.322035	5.34447	-4.67689	0.000102747	0.00179519	0.568636
ENSMUSG00000010392	-0.328855	6.7854	-4.67503	0.000103227	0.00180142	0.469258
ENSMUSG00000046139	0.351267	6.29705	4.6735	0.000103622	0.00180615	0.474603
ENSMUSG00000037513	0.383522	5.71556	4.66961	0.000104634	0.00182162	0.497636
ENSMUSG00000031816	-0.689469	4.42277	-4.66853	0.000104917	0.00182439	0.704342
ENSMUSG00000057637	0.355848	7.70944	4.66501	0.000105843	0.0018383	0.448725
ENSMUSG00000028035	0.65675	4.36568	4.66255	0.000106496	0.00184713	0.619837
ENSMUSG00000054945	-1.71657	0.86311	-4.66214	0.000106604	0.00184713	1.33469
ENSMUSG00000025898	-0.417251	5.41546	-4.66139	0.000106804	0.00184766	0.528835
ENSMUSG00000020740	-0.320144	7.07616	-4.66099	0.000106912	0.00184766	0.434957
ENSMUSG00000032420	0.467737	5.64378	4.66061	0.000107014	0.00184766	0.436064
ENSMUSG00000028943	0.891245	2.67031	4.65758	0.000107827	0.00185951	1.01627
ENSMUSG00000001552	-1.43275	1.48223	-4.65018	0.00010984	0.001892	1.24577
ENSMUSG00000004633	-2.01798	1.34533	-4.6488	0.00011022	0.00189478	1.31781
ENSMUSG00000072653	-0.668755	4.96942	-4.64865	0.000110261	0.00189478	0.577524
ENSMUSG00000030263	-0.411153	6.72675	-4.64548	0.000111137	0.00190661	0.406163
ENSMUSG00000048388	2.8338	-1.07416	4.64522	0.00011121	0.00190661	0.859316
ENSMUSG00000020182	-0.571307	2.27786	-4.64435	0.000111453	0.00190853	0.838489
ENSMUSG00000048351	-0.703794	3.47567	-4.64197	0.000112117	0.00191554	0.80331
ENSMUSG00000055707	-0.605807	3.74198	-4.64194	0.000112124	0.00191554	0.780015
ENSMUSG00000061578	1.00765	3.00765	4.63913	0.000112917	0.00192683	0.630668
ENSMUSG00000028411	-0.589299	4.22857	-4.63692	0.00011354	0.0019352	0.664433
ENSMUSG00000079547	1.92069	0.192726	4.63291	0.000114684	0.00195243	1.27494
ENSMUSG00000047777	0.551295	3.8621	4.62915	0.000115767	0.00196858	0.590264
ENSMUSG00000029655	-0.314715	6.8339	-4.62324	0.000117492	0.00199558	0.340931
ENSMUSG00000017713	-0.734822	4.24316	-4.61859	0.000118865	0.00201658	0.611449
ENSMUSG00000056501	1.63788	0.103366	4.61275	0.000120612	0.00204383	1.1874
ENSMUSG00000026034	-0.416914	8.66329	-4.61139	0.000121025	0.00204845	0.328178
ENSMUSG00000001143	0.77696	4.55946	4.60882	0.000121802	0.00205905	0.458912
ENSMUSG00000039264	-0.409369	8.57888	-4.6084	0.000121932	0.00205905	0.32341
ENSMUSG00000066892	-0.434483	6.65107	-4.60663	0.000122472	0.00206577	0.308566
ENSMUSG00000032712	0.446902	7.65747	4.60604	0.000122651	0.00206642	0.300747
ENSMUSG00000033287	1.55302	-0.52641	4.60114	0.000124164	0.0020895	1.13253
ENSMUSG00000022265	0.438243	4.77992	4.59486	0.000126131	0.00212015	0.401554
ENSMUSG00000024177	0.5691	2.9437	4.58607	0.000128932	0.00216475	0.694597
ENSMUSG00000071253	-0.601495	4.23844	-4.5843	0.000129505	0.00216988	0.526197
ENSMUSG00000083396	1.18103	5.7786	4.58421	0.000129534	0.00216988	0.254836
ENSMUSG00000006731	-0.420909	9.46021	-4.58226	0.000130167	0.00217799	0.286346
ENSMUSG00000028675	-0.432252	6.58325	-4.58109	0.000130549	0.00218188	0.235576
ENSMUSG00000053333	0.35167	4.47397	4.57984	0.000130955	0.00218617	0.389776
ENSMUSG00000002007	2.30239	-0.729388	4.57747	0.000131735	0.00219669	1.11996
ENSMUSG00000032265	-0.579463	7.42034	-4.57514	0.000132503	0.00220698	0.220719
ENSMUSG00000030780	-0.523799	4.96606	-4.57379	0.000132952	0.00221193	0.390692
ENSMUSG00000049103	1.2488	-0.262836	4.57189	0.000133584	0.00221993	1.10644
ENSMUSG00000020715	-0.697943	3.63945	-4.56966	0.000134333	0.00222786	0.573271
ENSMUSG00000029416	0.449773	4.34339	4.56956	0.000134366	0.00222786	0.371535
ENSMUSG00000033209	-0.45212	6.09157	-4.56561	0.0001357	0.00224743	0.225541
ENSMUSG00000099065	1.95489	1.97813	4.56402	0.000136242	0.00225384	0.940393
ENSMUSG00000040848	-0.331631	7.06454	-4.56331	0.000136482	0.00225528	0.189856
ENSMUSG00000022661	-1.23776	1.65946	-4.56215	0.000136879	0.00225906	0.977851
ENSMUSG00000029772	0.342136	5.97939	4.56174	0.000137021	0.00225906	0.199872
ENSMUSG00000048191	1.90064	3.96939	4.55832	0.000138197	0.00227589	0.612068
ENSMUSG00000029176	-0.333505	5.55453	-4.5575	0.00013848	0.00227686	0.242795
ENSMUSG00000042303	0.881868	2.21858	4.55725	0.000138567	0.00227686	0.804456
ENSMUSG00000090559	2.18494	-0.0819049	4.55599	0.000139006	0.0022803	1.09836
ENSMUSG00000032244	-0.388115	5.99441	-4.55539	0.000139214	0.0022803	0.194249
ENSMUSG00000039193	1.01058	2.28483	4.5553	0.000139244	0.0022803	0.88701
ENSMUSG00000035372	1.05462	1.27917	4.5548	0.000139419	0.00228061	0.97673
ENSMUSG00000017376	-0.360879	6.86638	-4.54924	0.000141371	0.00230996	0.156771
ENSMUSG00000051497	-0.935546	1.61037	-4.54673	0.000142261	0.00232189	0.958851
ENSMUSG00000032436	0.530208	5.13027	4.54297	0.000143604	0.00234077	0.213261
ENSMUSG00000028034	-0.517879	7.83039	-4.54228	0.000143851	0.00234077	0.142238
ENSMUSG00000086450	0.563842	3.79818	4.54176	0.000144039	0.00234077	0.453423
ENSMUSG00000086873	-1.21601	1.59057	-4.54164	0.000144081	0.00234077	0.955963
ENSMUSG00000051212	-0.56094	4.47626	-4.54127	0.000144217	0.00234077	0.214053
ENSMUSG00000006931	-1.90068	-0.0138327	-4.53972	0.000144776	0.00234724	1.05726
ENSMUSG00000036285	0.406434	4.98824	4.53927	0.000144941	0.0023473	0.216149
ENSMUSG00000008206	-0.519791	4.75751	-4.53791	0.000145433	0.00235267	0.349592
ENSMUSG00000037855	-0.766706	3.35109	-4.53467	0.000146616	0.00236918	0.634039
ENSMUSG00000020381	-1.88742	0.734919	-4.53245	0.000147432	0.00237974	1.05117
ENSMUSG00000020396	0.589378	4.58411	4.53193	0.000147623	0.0023802	0.285094
ENSMUSG00000039220	-0.476103	6.29648	-4.52727	0.000149356	0.00240549	0.117528
ENSMUSG00000025041	0.348016	4.91909	4.52615	0.000149773	0.00240781	0.223791
ENSMUSG00000097479	1.25356	3.21251	4.52559	0.000149984	0.00240781	0.595536
ENSMUSG00000042606	0.585037	4.61915	4.52556	0.000149994	0.00240781	0.289994
ENSMUSG00000078667	0.549955	4.62303	4.52471	0.000150315	0.00241031	0.300198
ENSMUSG00000036533	0.540599	4.59745	4.51853	0.000152658	0.0024448	0.238828
ENSMUSG00000085175	-0.915129	1.55022	-4.51815	0.0001528	0.0024448	0.904665
ENSMUSG00000097208	-1.17472	0.0421515	-4.51648	0.00015344	0.00245235	1.01185
ENSMUSG00000097827	-2.2534	-0.907937	-4.51509	0.000153975	0.00245627	0.862288
ENSMUSG00000042233	1.71649	1.38218	4.51485	0.000154069	0.00245627	0.747904
ENSMUSG00000026389	-1.71453	-0.332338	-4.51454	0.000154189	0.00245627	1.0071
ENSMUSG00000079457	2.01346	2.6725	4.51299	0.000154784	0.00246307	0.880309
ENSMUSG00000019984	-0.562617	5.74217	-4.51247	0.000154987	0.00246362	0.126613
ENSMUSG00000035021	0.362188	6.88721	4.51041	0.000155788	0.00247367	0.0562677
ENSMUSG00000028426	0.366911	6.80622	4.50834	0.000156598	0.00248347	0.0509945
ENSMUSG00000025870	-0.967346	1.30043	-4.50796	0.000156745	0.00248347	0.897717
ENSMUSG00000026360	0.636223	3.65947	4.50694	0.000157147	0.00248714	0.377343
ENSMUSG00000022214	-0.311421	6.77481	-4.50559	0.000157677	0.00249283	0.0500098
ENSMUSG00000037868	-0.520568	3.90298	-4.50407	0.000158276	0.0024996	0.33734
ENSMUSG00000028793	0.410744	4.88574	4.50172	0.00015921	0.00251163	0.154324
ENSMUSG00000030217	0.546899	3.54957	4.50037	0.00015975	0.00251744	0.231521
ENSMUSG00000047539	-0.283081	6.34899	-4.4984	0.000160539	0.00252715	0.0449737
ENSMUSG00000039568	-0.391429	6.29539	-4.49788	0.000160745	0.00252768	0.0464534
ENSMUSG00000027259	-0.383205	4.36906	-4.49592	0.000161536	0.00253737	0.256259
ENSMUSG00000040761	0.581997	7.46721	4.49292	0.000162755	0.00255379	0.0186628
ENSMUSG00000042514	1.92286	-0.947856	4.4915	0.000163334	0.00256013	0.879282
ENSMUSG00000089844	2.14794	-0.532422	4.49015	0.000163886	0.00256587	0.913358
ENSMUSG00000047583	-0.71951	3.15893	-4.48974	0.000164052	0.00256587	0.530349
ENSMUSG00000078899	-0.514018	6.81631	-4.48785	0.000164831	0.00257531	0.00510337
ENSMUSG00000038214	-0.551518	3.97681	-4.48675	0.000165284	0.00257963	0.293358
ENSMUSG00000068227	0.443449	7.35531	4.47867	0.000168659	0.00262951	-0.0194181
ENSMUSG00000036061	-0.607403	4.46656	-4.47798	0.00016895	0.00263123	0.223222
ENSMUSG00000047146	-0.855021	5.19919	-4.47577	0.000169889	0.00264304	0.0740769
ENSMUSG00000042121	0.399383	5.80682	4.47368	0.000170776	0.00265402	0.0117255
ENSMUSG00000005233	-1.74461	-0.512833	-4.47226	0.000171384	0.00266064	0.88992
ENSMUSG00000024182	0.298407	7.1845	4.47056	0.000172116	0.00266917	-0.0428378
ENSMUSG00000062822	-0.30559	6.60979	-4.46976	0.000172462	0.0026717	-0.0371222
ENSMUSG00000032220	1.33354	1.12032	4.4677	0.000173354	0.00268267	0.842958
ENSMUSG00000037151	0.540486	3.21599	4.46666	0.000173802	0.00268677	0.328088
ENSMUSG00000032184	0.840949	3.16296	4.46619	0.000174008	0.00268711	0.440962
ENSMUSG00000079083	-0.516077	4.13543	-4.46358	0.000175145	0.00270182	0.22714
ENSMUSG00000022827	-0.644715	3.21835	-4.46266	0.000175551	0.00270522	0.470409
ENSMUSG00000078517	-0.381741	6.27997	-4.46128	0.000176157	0.0027117	-0.0371964
ENSMUSG00000022375	1.60325	-1.01429	4.45982	0.000176801	0.00271875	0.880823
ENSMUSG00000071072	0.844776	6.34421	4.45812	0.000177555	0.00272748	-0.0705687
ENSMUSG00000062794	-1.05777	2.01396	-4.45524	0.000178838	0.00274431	0.657271
ENSMUSG00000040407	0.693134	7.19453	4.45273	0.000179966	0.00275872	-0.0863559
ENSMUSG00000022519	-2.09407	-1.38562	-4.45158	0.000180486	0.0027638	0.759653
ENSMUSG00000005968	0.700835	2.47745	4.44683	0.000182639	0.00279385	0.481131
ENSMUSG00000019539	0.435635	5.72119	4.44388	0.000183994	0.00281163	-0.0833097
ENSMUSG00000025878	0.352961	7.04673	4.43994	0.000185818	0.00283653	-0.11685
ENSMUSG00000033685	-0.603663	8.43315	-4.43925	0.000186136	0.00283842	-0.0986576
ENSMUSG00000068923	0.341884	5.67774	4.4377	0.000186863	0.00284654	-0.0888277
ENSMUSG00000029571	-0.382745	6.60627	-4.43723	0.00018708	0.00284689	-0.115842
ENSMUSG00000000282	-0.306607	6.36631	-4.4303	0.000190353	0.00289183	-0.126584
ENSMUSG00000034353	-0.557189	5.09951	-4.42991	0.000190539	0.00289183	0.0316679
ENSMUSG00000030878	0.74959	3.6717	4.42972	0.000190626	0.00289183	0.114443
ENSMUSG00000034686	-0.983072	2.95445	-4.4276	0.000191643	0.00290423	0.395733
ENSMUSG00000020898	-0.476089	4.72176	-4.42115	0.00019476	0.00294841	0.0542436
ENSMUSG00000005583	1.72606	1.37541	4.41997	0.000195333	0.00295355	0.678777
ENSMUSG00000022848	0.347915	5.25035	4.4196	0.000195514	0.00295355	-0.103716
ENSMUSG00000021703	-0.489424	4.47256	-4.41921	0.000195705	0.00295355	0.0807363
ENSMUSG00000090019	-0.388051	7.10412	-4.41855	0.000196027	0.00295536	-0.170078
ENSMUSG00000073407	-2.1648	-0.822287	-4.41345	0.000198546	0.00299025	0.690298
ENSMUSG00000045576	0.349721	3.88594	4.41299	0.000198775	0.00299062	0.0524215
ENSMUSG00000034993	0.447728	5.47397	4.4117	0.000199415	0.00299717	-0.0647107
ENSMUSG00000049327	0.501778	5.79292	4.4111	0.000199717	0.00299863	-0.152513
ENSMUSG00000000579	-0.479957	5.75674	-4.4102	0.000200167	0.00300058	-0.124431
ENSMUSG00000050179	-0.6621	-0.467742	-4.41002	0.000200258	0.00300058	0.241357
ENSMUSG00000047694	-0.50263	5.60133	-4.40614	0.000202211	0.00302559	-0.108571
ENSMUSG00000072847	0.683401	3.46958	4.40588	0.000202341	0.00302559	0.191329
ENSMUSG00000029263	-0.933697	3.14461	-4.40434	0.000203119	0.00303413	0.324914
ENSMUSG00000097793	-0.963555	1.81592	-4.40304	0.000203785	0.00304098	0.54857
ENSMUSG00000001741	-0.370001	8.32806	-4.40177	0.000204429	0.00304747	-0.194593
ENSMUSG00000086405	-2.56233	-1.04438	-4.39843	0.000206146	0.00306994	0.651245
ENSMUSG00000036885	3.2102	-2.16147	4.3958	0.000207508	0.00308708	0.462805
ENSMUSG00000063316	0.693593	8.0593	4.39452	0.000208171	0.00309379	-0.213729
ENSMUSG00000063254	1.4362	0.576021	4.39308	0.000208923	0.00310182	0.603472
ENSMUSG00000035202	2.22134	11.4209	4.39157	0.000209716	0.00311043	-0.102491
ENSMUSG00000035875	-1.13803	0.176158	-4.39114	0.000209937	0.00311056	0.705357
ENSMUSG00000045039	2.50521	-1.22226	4.38773	0.00021174	0.00313409	0.692338
ENSMUSG00000083435	2.34167	-2.10236	4.38608	0.000212615	0.00314386	0.691969
ENSMUSG00000041773	-0.324161	5.2171	-4.38433	0.000213548	0.00315447	-0.21935
ENSMUSG00000002028	0.926611	9.13957	4.38344	0.00021402	0.00315825	-0.208496
ENSMUSG00000042750	2.89734	-2.25927	4.38196	0.000214818	0.00316683	0.596801
ENSMUSG00000097375	-1.04853	2.1158	-4.38107	0.000215295	0.00317032	0.513162
ENSMUSG00000057137	-0.872468	2.55124	-4.38071	0.000215488	0.00317032	0.32523
ENSMUSG00000038518	-0.381826	6.5921	-4.3795	0.000216139	0.00317367	-0.260527
ENSMUSG00000041782	-1.21904	0.860766	-4.37948	0.00021615	0.00317367	0.628379
ENSMUSG00000021770	0.348945	5.02165	4.37878	0.000216529	0.00317604	-0.166996
ENSMUSG00000019988	-0.460724	4.77166	-4.37803	0.000216937	0.00317884	-0.103522
ENSMUSG00000036499	0.929573	3.34181	4.37724	0.000217364	0.00318139	0.187591
ENSMUSG00000021959	0.436617	6.27015	4.37691	0.000217546	0.00318139	-0.266088
ENSMUSG00000081805	3.2114	-1.97536	4.37619	0.000217938	0.00318318	0.39841
ENSMUSG00000097824	1.03613	1.03089	4.37575	0.000218178	0.00318318	0.479764
ENSMUSG00000087633	-1.57787	0.284067	-4.37549	0.000218321	0.00318318	0.689145
ENSMUSG00000073639	0.423504	5.92803	4.37215	0.00022015	0.00320664	-0.265176
ENSMUSG00000038546	0.287838	6.81831	4.37154	0.000220487	0.00320836	-0.288618
ENSMUSG00000038172	0.582688	7.04816	4.3645	0.000224402	0.00325836	-0.304595
ENSMUSG00000068105	1.00502	2.61133	4.36445	0.000224432	0.00325836	0.436727
ENSMUSG00000051890	0.437102	5.91986	4.36417	0.000224591	0.00325836	-0.239067
ENSMUSG00000026240	-0.526217	4.30654	-4.36244	0.000225565	0.00326924	-0.044575
ENSMUSG00000094114	1.1725	1.68343	4.35917	0.000227414	0.00329277	0.307867
ENSMUSG00000087543	-0.565678	3.16771	-4.35836	0.000227873	0.00329616	0.115302
ENSMUSG00000073147	-0.588328	5.10053	-4.35516	0.000229708	0.00331941	-0.175449
ENSMUSG00000006526	-0.523198	3.89459	-4.35351	0.000230656	0.00332983	-0.00266617
ENSMUSG00000023873	-0.807943	2.6229	-4.35189	0.000231593	0.00333553	0.387653
ENSMUSG00000015314	-0.529924	7.46508	-4.35167	0.000231721	0.00333553	-0.332162
ENSMUSG00000064267	-0.394925	7.10907	-4.35164	0.000231736	0.00333553	-0.336434
ENSMUSG00000097815	-0.591001	11.7062	-4.35113	0.000232032	0.00333652	-0.147232
ENSMUSG00000019970	-0.457582	6.94034	-4.35054	0.000232378	0.0033382	-0.333009
ENSMUSG00000037922	1.08762	2.08675	4.34999	0.000232695	0.00333948	0.243136
ENSMUSG00000040250	0.430413	6.08654	4.34205	0.00023736	0.00340309	-0.348342
ENSMUSG00000025058	1.06413	-0.0392695	4.34052	0.000238275	0.00341286	0.542207
ENSMUSG00000047807	3.37458	-2.59142	4.33928	0.000239011	0.00342005	0.397418
ENSMUSG00000022095	-0.352465	5.94012	-4.33783	0.000239879	0.00342704	-0.315313
ENSMUSG00000042814	0.983725	1.62935	4.33762	0.000240005	0.00342704	0.358864
ENSMUSG00000054469	-0.663014	4.75568	-4.33694	0.000240417	0.00342704	-0.18872
ENSMUSG00000033323	0.291289	5.75363	4.33658	0.00024063	0.00342704	-0.343105
ENSMUSG00000085376	-2.33712	0.590534	-4.33652	0.000240671	0.00342704	0.60127
ENSMUSG00000046159	-1.86714	-0.839939	-4.33583	0.000241082	0.00342956	0.601737
ENSMUSG00000050714	-0.721053	4.21274	-4.33527	0.000241419	0.00343102	-0.0952766
ENSMUSG00000026499	0.387112	6.2148	4.3345	0.000241887	0.00343432	-0.365782
ENSMUSG00000026932	0.675572	2.706	4.33288	0.00024287	0.00344493	-0.0153961
ENSMUSG00000047342	-0.830993	2.53485	-4.3322	0.000243283	0.00344746	0.38985
ENSMUSG00000014303	-2.16137	0.232141	-4.32988	0.000244695	0.00346411	0.589887
ENSMUSG00000016520	0.346464	5.31923	4.32881	0.000245352	0.00347004	-0.334642
ENSMUSG00000027680	0.559238	6.42885	4.32472	0.000247874	0.00350233	-0.398479
ENSMUSG00000028454	-0.469151	6.03258	-4.32248	0.000249266	0.0035186	-0.351675
ENSMUSG00000034829	-1.15018	-0.578426	-4.31665	0.000252926	0.0035667	0.370317
ENSMUSG00000027346	-0.448164	6.62479	-4.31628	0.000253161	0.0035667	-0.416399
ENSMUSG00000046058	0.727249	2.4434	4.31524	0.000253822	0.00357257	0.208587
ENSMUSG00000029178	-0.579994	7.75843	-4.31432	0.000254404	0.00357524	-0.42588
ENSMUSG00000025933	-1.34479	0.474145	-4.31417	0.000254501	0.00357524	0.53333
ENSMUSG00000035561	-0.604847	2.80983	-4.31332	0.000255041	0.00357938	0.0830898
ENSMUSG00000039976	-0.70067	3.88577	-4.31179	0.000256017	0.00358964	-0.214813
ENSMUSG00000021238	-0.45979	4.78495	-4.31024	0.000257011	0.00360012	-0.20586
ENSMUSG00000044068	0.458585	5.71319	4.30965	0.000257396	0.00360033	-0.385339
ENSMUSG00000037126	0.905325	2.39441	4.30946	0.000257518	0.00360033	0.0937124
ENSMUSG00000030199	0.386406	5.49913	4.30745	0.00025881	0.00361364	-0.377885
ENSMUSG00000029458	0.268929	6.53465	4.30722	0.000258965	0.00361364	-0.444844
ENSMUSG00000063564	-0.351689	4.34169	-4.30349	0.000261387	0.00364066	-0.156755
ENSMUSG00000028133	-1.20677	2.66911	-4.30347	0.000261399	0.00364066	0.345067
ENSMUSG00000022295	-0.413133	5.47427	-4.30176	0.000262523	0.00365285	-0.390598
ENSMUSG00000017417	-2.18573	-0.216507	-4.30089	0.000263092	0.00365482	0.525042
ENSMUSG00000027651	-0.31048	5.54976	-4.30078	0.000263165	0.00365482	-0.411528
ENSMUSG00000040557	-0.77482	4.52555	-4.29899	0.000264348	0.00366776	-0.205765
ENSMUSG00000026554	-0.369234	7.22412	-4.29452	0.000267316	0.00370543	-0.478422
ENSMUSG00000029344	0.45911	6.81976	4.29332	0.000268117	0.00371302	-0.483203
ENSMUSG00000029510	-1.4906	1.80576	-4.28984	0.000270463	0.00373878	0.421727
ENSMUSG00000023034	0.752773	5.14792	4.2898	0.000270489	0.00373878	-0.351743
ENSMUSG00000028228	0.425432	5.59799	4.28835	0.00027147	0.00374589	-0.455057
ENSMUSG00000052605	-0.919985	1.59691	-4.2882	0.000271575	0.00374589	0.239772
ENSMUSG00000031967	-0.470961	5.36763	-4.28791	0.000271772	0.00374589	-0.41663
ENSMUSG00000048924	-0.390195	5.2019	-4.28607	0.00027302	0.00375956	-0.362426
ENSMUSG00000038910	0.301531	7.17218	4.28514	0.000273661	0.00376484	-0.503764
ENSMUSG00000044950	0.441257	5.54674	4.28191	0.000275878	0.00379176	-0.446127
ENSMUSG00000019768	0.640615	2.40224	4.28102	0.000276493	0.00379665	0.0601642
ENSMUSG00000054517	0.451536	5.95927	4.27807	0.000278534	0.00382109	-0.502925
ENSMUSG00000075389	-2.53708	-1.82348	-4.27708	0.000279231	0.00382706	0.329226
ENSMUSG00000045232	-3.00607	-1.79761	-4.27389	0.000281463	0.00385404	0.189759
ENSMUSG00000031310	-0.548985	5.81474	-4.27028	0.000284013	0.00388532	-0.472779
ENSMUSG00000024317	0.577295	5.73608	4.26934	0.000284685	0.00389088	-0.504974
ENSMUSG00000097251	-1.46208	0.658912	-4.26828	0.000285438	0.00389752	0.425708
ENSMUSG00000039108	0.31105	5.75256	4.26719	0.00028622	0.00390455	-0.502876
ENSMUSG00000074357	-1.44631	0.082462	-4.26418	0.000288379	0.00393034	0.429695
ENSMUSG00000027778	-0.404641	7.18871	-4.25988	0.000291494	0.00396909	-0.563805
ENSMUSG00000002985	0.845435	3.05418	4.25856	0.000292456	0.00397848	-0.0143548
ENSMUSG00000021993	0.416217	3.76761	4.2578	0.000293012	0.00398235	-0.264854
ENSMUSG00000074264	1.53494	-0.102644	4.25628	0.000294128	0.00399113	0.396536
ENSMUSG00000001288	-0.412778	6.84319	-4.25618	0.000294204	0.00399113	-0.562945
ENSMUSG00000040276	-0.475614	6.22684	-4.25477	0.000295241	0.00399814	-0.552115
ENSMUSG00000080316	-2.11307	-0.284513	-4.25473	0.000295267	0.00399814	0.407434
ENSMUSG00000007872	-1.14943	3.72141	-4.25242	0.000296978	0.00401759	-0.27131
ENSMUSG00000039286	0.886428	1.46313	4.25197	0.00029731	0.00401836	0.205167
ENSMUSG00000092277	-1.48998	0.655299	-4.25064	0.000298306	0.0040281	0.388759
ENSMUSG00000038421	2.15391	0.295351	4.24901	0.000299524	0.00404081	0.396669
ENSMUSG00000043336	0.650739	6.73708	4.24671	0.000301247	0.0040603	-0.595713
ENSMUSG00000030447	0.664496	3.44046	4.2459	0.000301858	0.0040648	-0.180279
ENSMUSG00000038502	0.876811	3.99793	4.23607	0.000309362	0.00416202	-0.325152
ENSMUSG00000036964	-1.55246	0.0838524	-4.23558	0.000309746	0.00416231	0.26711
ENSMUSG00000031239	-0.625765	4.0332	-4.23531	0.000309953	0.00416231	-0.257858
ENSMUSG00000024006	-0.269482	9.23457	-4.23427	0.000310762	0.00416934	-0.595449
ENSMUSG00000059325	0.589968	4.44457	4.23306	0.000311703	0.00417813	-0.460965
ENSMUSG00000037570	-0.563044	5.53433	-4.2314	0.000312992	0.00419157	-0.558283
ENSMUSG00000030468	1.6923	1.03055	4.22775	0.000315862	0.00422391	0.240078
ENSMUSG00000068220	-0.714639	4.66314	-4.2276	0.000315984	0.00422391	-0.476455
ENSMUSG00000059248	-0.346652	8.75899	-4.22545	0.000317682	0.00424068	-0.623867
ENSMUSG00000032300	-0.464637	5.77354	-4.22528	0.000317819	0.00424068	-0.573653
ENSMUSG00000064215	-0.539586	6.1198	-4.22398	0.000318855	0.00425063	-0.62034
ENSMUSG00000085887	-0.744696	6.15301	-4.2232	0.000319474	0.00425499	-0.546529
ENSMUSG00000086825	0.716337	5.50764	4.22271	0.000319863	0.00425631	-0.566459
ENSMUSG00000097154	-0.708549	3.39491	-4.22233	0.000320166	0.00425645	-0.156457
ENSMUSG00000042901	0.466899	5.33568	4.21998	0.000322051	0.00427764	-0.616768
ENSMUSG00000036737	0.298363	6.08663	4.21927	0.000322625	0.00428137	-0.648548
ENSMUSG00000033222	-0.638095	4.5492	-4.2147	0.00032633	0.00432661	-0.47364
ENSMUSG00000033871	0.563511	4.18181	4.21428	0.000326673	0.00432724	-0.438918
ENSMUSG00000097258	0.672931	2.40166	4.21339	0.000327396	0.00433289	-0.187748
ENSMUSG00000055632	-2.29006	-2.64231	-4.21251	0.000328122	0.00433687	0.111537
ENSMUSG00000014592	-0.634459	3.78113	-4.2123	0.00032829	0.00433687	-0.297992
ENSMUSG00000045248	0.433867	4.30343	4.21129	0.000329119	0.00434389	-0.478946
ENSMUSG00000047881	0.494433	3.42536	4.20968	0.000330452	0.00435438	-0.538937
ENSMUSG00000020680	0.352427	7.27854	4.20961	0.000330509	0.00435438	-0.690936
ENSMUSG00000067369	-0.319573	5.20152	-4.2085	0.000331428	0.00436255	-0.572203
ENSMUSG00000030124	1.79469	-0.0601942	4.20735	0.000332379	0.00436521	0.308384
ENSMUSG00000038072	-0.486444	5.25565	-4.2071	0.000332589	0.00436521	-0.504411
ENSMUSG00000035863	-1.66815	0.826809	-4.2069	0.000332753	0.00436521	0.302824
ENSMUSG00000025104	0.529335	6.60782	4.2065	0.000333084	0.00436521	-0.686617
ENSMUSG00000034028	-0.498847	7.0073	-4.20619	0.000333345	0.00436521	-0.695449
ENSMUSG00000078515	0.367393	6.56447	4.20573	0.000333723	0.00436521	-0.699265
ENSMUSG00000076937	1.42329	1.40177	4.20551	0.000333907	0.00436521	0.16829
ENSMUSG00000054723	-0.40532	4.22438	-4.20513	0.000334225	0.00436521	-0.437582
ENSMUSG00000065037	1.88439	5.56677	4.20502	0.000334316	0.00436521	-0.639279
ENSMUSG00000025821	-0.521076	4.05157	-4.19907	0.000339321	0.0044266	-0.444832
ENSMUSG00000097281	-1.15615	0.200955	-4.1974	0.000340741	0.00443973	0.226627
ENSMUSG00000020042	-0.404559	5.95517	-4.19683	0.000341224	0.00443973	-0.705528
ENSMUSG00000026618	-0.363363	6.47575	-4.19682	0.000341237	0.00443973	-0.709885
ENSMUSG00000097546	2.83259	-2.4546	4.19601	0.000341926	0.00444474	0.118899
ENSMUSG00000064068	0.371591	4.86756	4.19076	0.00034644	0.00449941	-0.584028
ENSMUSG00000028708	0.29557	5.50466	4.18945	0.000347577	0.00451018	-0.671847
ENSMUSG00000071203	1.56226	0.251957	4.18845	0.000348443	0.00451536	0.108826
ENSMUSG00000035239	-0.436093	3.23653	-4.18828	0.000348594	0.00451536	-0.410485
ENSMUSG00000003458	-0.250599	6.74184	-4.18776	0.000349046	0.00451721	-0.739806
ENSMUSG00000029456	-0.553071	3.94727	-4.18546	0.000351053	0.00453916	-0.45368
ENSMUSG00000043644	-1.46604	0.0514889	-4.18055	0.000355389	0.00459117	0.219318
ENSMUSG00000022425	2.27123	-1.27107	4.17943	0.000356382	0.00459994	0.246908
ENSMUSG00000030802	-0.445363	4.93707	-4.17712	0.000358442	0.00462245	-0.60323
ENSMUSG00000028629	-0.444795	3.99343	-4.1766	0.000358907	0.00462314	-0.473993
ENSMUSG00000097217	-0.964507	1.23378	-4.17636	0.000359128	0.00462314	0.121023
ENSMUSG00000031422	0.522137	5.71167	4.17514	0.000360216	0.00463307	-0.740703
ENSMUSG00000032586	-0.952734	2.08786	-4.17426	0.00036101	0.0046392	0.0650224
ENSMUSG00000026115	1.42915	-0.934206	4.17316	0.000362003	0.00464788	0.215793
ENSMUSG00000053286	0.337877	5.82938	4.17143	0.000363574	0.00466396	-0.756349
ENSMUSG00000071291	-0.66033	3.72632	-4.16999	0.000364879	0.00467659	-0.455213
ENSMUSG00000022020	0.557358	4.96942	4.16811	0.000366596	0.00469448	-0.684062
ENSMUSG00000052291	-0.7941	2.58948	-4.1666	0.000367986	0.00470724	-0.151948
ENSMUSG00000030386	-0.41185	4.33107	-4.16632	0.000368236	0.00470724	-0.548299
ENSMUSG00000054099	-0.558252	4.26982	-4.16495	0.000369505	0.00471933	-0.509384
ENSMUSG00000053574	-1.40801	-0.095612	-4.16337	0.000370967	0.00473388	0.213286
ENSMUSG00000029560	1.04362	1.1029	4.1599	0.000374193	0.00477088	0.0844137
ENSMUSG00000017929	-0.300114	5.85866	-4.15642	0.000377459	0.00480431	-0.777488
ENSMUSG00000030605	-0.532157	4.32599	-4.1564	0.000377472	0.00480431	-0.478252
ENSMUSG00000000902	-0.34202	6.09671	-4.15592	0.000377925	0.00480589	-0.777524
ENSMUSG00000054321	0.383697	5.12592	4.15505	0.000378749	0.00481218	-0.740434
ENSMUSG00000037649	0.551357	5.20575	4.15321	0.00038049	0.0048301	-0.766206
ENSMUSG00000058099	-0.80027	2.22944	-4.15202	0.000381622	0.00484028	-0.410888
ENSMUSG00000035064	0.323557	4.99895	4.14901	0.0003845	0.00487255	-0.736475
ENSMUSG00000074896	-0.931209	3.56505	-4.1478	0.000385668	0.00488281	-0.54142
ENSMUSG00000048721	1.18135	1.57605	4.14748	0.000385977	0.00488281	-0.144281
ENSMUSG00000071192	1.02045	0.961364	4.14565	0.000387736	0.00490082	0.0590476
ENSMUSG00000090112	-0.521537	6.44452	-4.14406	0.000389282	0.00491611	-0.837615
ENSMUSG00000031985	-0.377033	6.50447	-4.14294	0.000390372	0.00492562	-0.844954
ENSMUSG00000097747	-2.86459	-2.32749	-4.14178	0.000391499	0.00493559	0.0534721
ENSMUSG00000069135	0.463472	4.72776	4.13969	0.000393548	0.00495304	-0.697935
ENSMUSG00000040345	-0.521088	8.13907	-4.13968	0.000393561	0.00495304	-0.851632
ENSMUSG00000048787	0.342448	4.75176	4.13745	0.00039576	0.00497643	-0.738229
ENSMUSG00000036106	1.37601	-0.309759	4.13682	0.000396376	0.0049799	0.150808
ENSMUSG00000027405	-0.294208	7.77067	-4.13546	0.000397731	0.00498863	-0.869598
ENSMUSG00000070605	0.615615	3.39805	4.13543	0.000397753	0.00498863	-0.688868
ENSMUSG00000026603	0.394225	3.95809	4.13379	0.000399385	0.0050048	-0.583166
ENSMUSG00000031835	-0.31928	7.44104	-4.13344	0.000399742	0.00500499	-0.876576
ENSMUSG00000057103	-1.07802	0.797174	-4.13305	0.000400129	0.00500555	0.0214358
ENSMUSG00000039968	0.415779	7.05067	4.13116	0.000402021	0.00502492	-0.884765
ENSMUSG00000081448	1.96459	1.94751	4.12643	0.000406795	0.00508024	0.13026
ENSMUSG00000085208	-0.408121	5.76656	-4.12451	0.00040874	0.00510019	-0.865444
ENSMUSG00000072889	0.45452	3.55129	4.12349	0.000409786	0.00510887	-0.489345
ENSMUSG00000070806	-2.75356	-2.53588	-4.12291	0.000410385	0.00511198	-0.179651
ENSMUSG00000036902	0.816391	1.74182	4.12122	0.00041211	0.0051291	-0.24073
ENSMUSG00000070999	1.34852	0.165305	4.11959	0.000413795	0.00513833	0.0880188
ENSMUSG00000059316	0.381153	4.52353	4.11954	0.00041385	0.00513833	-0.732746
ENSMUSG00000045140	-0.425359	4.27094	-4.11948	0.000413905	0.00513833	-0.650904
ENSMUSG00000084806	-1.16031	1.73291	-4.11576	0.000417768	0.00517773	-0.0991979
ENSMUSG00000086196	2.78752	-2.43195	4.11574	0.000417787	0.00517773	-0.0842822
ENSMUSG00000053835	-0.766788	5.6822	-4.11448	0.000419102	0.00518962	-0.817529
ENSMUSG00000015202	0.605282	3.58499	4.11351	0.000420122	0.00519785	-0.557893
ENSMUSG00000025959	-0.379168	6.79004	-4.11268	0.000420989	0.00520417	-0.924425
ENSMUSG00000029098	-0.347462	5.93722	-4.11219	0.000421506	0.00520463	-0.895303
ENSMUSG00000028063	1.15918	1.09533	4.11197	0.000421737	0.00520463	-0.0340846
ENSMUSG00000027864	-0.837083	2.70829	-4.11009	0.000423715	0.00522463	-0.348988
ENSMUSG00000020802	0.397987	4.90809	4.1079	0.000426039	0.00524885	-0.818754
ENSMUSG00000047412	0.384722	6.69606	4.10718	0.000426807	0.00525389	-0.942321
ENSMUSG00000050212	-0.549157	2.95774	-4.10669	0.000427323	0.00525444	-0.473513
ENSMUSG00000087679	-0.38872	5.32147	-4.10621	0.000427844	0.00525444	-0.834042
ENSMUSG00000047419	-1.354	1.30798	-4.10601	0.000428048	0.00525444	-0.0675539
ENSMUSG00000064358	-0.846893	11.7056	-4.10579	0.000428289	0.00525444	-0.808994
ENSMUSG00000050628	0.507198	5.91521	4.10428	0.000429905	0.00526912	-0.916466
ENSMUSG00000033031	-0.851109	2.23834	-4.104	0.000430206	0.00526912	-0.246008
ENSMUSG00000029131	0.311636	7.03131	4.10202	0.000432338	0.0052908	-0.956342
ENSMUSG00000036721	0.570992	3.51966	4.10044	0.000434038	0.00530717	-0.551675
ENSMUSG00000000915	0.414278	6.09769	4.09882	0.000435801	0.00531989	-0.935943
ENSMUSG00000048621	2.95755	-2.24639	4.09881	0.000435806	0.00531989	-0.121468
ENSMUSG00000073628	2.34936	-1.05672	4.09494	0.000440035	0.00536704	-0.0505337
ENSMUSG00000035936	0.948947	3.38429	4.09435	0.000440683	0.00537045	-0.307111
ENSMUSG00000020732	-0.515883	6.36926	-4.09357	0.000441539	0.00537406	-0.950576
ENSMUSG00000046707	0.399308	4.91242	4.09341	0.000441714	0.00537406	-0.84258
ENSMUSG00000085434	-1.07353	1.30637	-4.09255	0.000442668	0.00537418	-0.0651398
ENSMUSG00000026039	-1.77733	0.118021	-4.09246	0.000442769	0.00537418	0.0564916
ENSMUSG00000069255	-1.21658	1.36663	-4.09236	0.000442878	0.00537418	-0.0975557
ENSMUSG00000039275	0.33366	5.673	4.09207	0.000443193	0.00537418	-0.943384
ENSMUSG00000027219	-0.309115	7.15705	-4.0897	0.00044582	0.00540155	-0.976513
ENSMUSG00000032565	-0.582658	4.70808	-4.08602	0.000449933	0.00544687	-0.746486
ENSMUSG00000036676	0.691648	1.83903	4.08367	0.000452577	0.00547435	-0.323471
ENSMUSG00000028180	-0.42543	6.55491	-4.08203	0.000454438	0.00549231	-0.990584
ENSMUSG00000071064	-0.49371	5.58189	-4.07778	0.000459271	0.00554614	-0.921857
ENSMUSG00000073866	-2.08538	-0.652571	-4.07462	0.000462901	0.00558537	0.00925169
ENSMUSG00000037536	0.371353	4.1133	4.07394	0.000463687	0.00559024	-0.809959
ENSMUSG00000022814	0.39928	4.73836	4.07308	0.000464681	0.00559761	-0.910611
ENSMUSG00000020340	0.375718	8.42763	4.07239	0.000465487	0.0056027	-1.00362
ENSMUSG00000073096	-0.517615	4.83058	-4.06927	0.000469119	0.00564178	-0.871674
ENSMUSG00000031162	-1.32384	0.658874	-4.06614	0.0004728	0.00568137	-0.0421732
ENSMUSG00000039686	-0.388862	6.96412	-4.06553	0.000473509	0.00568522	-1.04118
ENSMUSG00000040287	1.03506	0.515452	4.06461	0.000474601	0.00569366	-0.0918664
ENSMUSG00000086407	1.72583	-1.44721	4.06406	0.000475248	0.00569526	-0.0230754
ENSMUSG00000033581	-0.734233	2.11923	-4.06384	0.000475514	0.00569526	-0.333082
ENSMUSG00000024817	0.27848	6.32942	4.06262	0.000476968	0.005708	-1.0458
ENSMUSG00000030598	0.657722	2.95413	4.06215	0.000477521	0.00570815	-0.51502
ENSMUSG00000031904	0.374642	5.85296	4.06195	0.000477761	0.00570815	-1.02645
ENSMUSG00000037364	0.272739	7.97778	4.05833	0.000482092	0.0057552	-1.05948
ENSMUSG00000042744	0.741921	7.52273	4.0575	0.000483082	0.00576231	-1.05662
ENSMUSG00000046982	0.27962	5.93189	4.0568	0.000483934	0.00576556	-1.04912
ENSMUSG00000064307	-0.844899	0.995062	-4.05662	0.000484143	0.00576556	-0.169658
ENSMUSG00000097021	-1.75191	-1.01868	-4.05586	0.000485071	0.00577191	-0.0245668
ENSMUSG00000091387	-3.02598	-2.62684	-4.0531	0.000488413	0.00579644	-0.250667
ENSMUSG00000094856	1.06755	3.79931	4.0529	0.000488654	0.00579644	-0.77397
ENSMUSG00000003464	-0.393296	5.26815	-4.05237	0.0004893	0.00579644	-0.955888
ENSMUSG00000032481	-0.325657	6.43378	-4.05225	0.000489453	0.00579644	-1.06886
ENSMUSG00000096056	0.672053	2.18539	4.05223	0.00048948	0.00579644	-0.394704
ENSMUSG00000047037	0.936307	1.97791	4.0522	0.000489511	0.00579644	-0.369575
ENSMUSG00000056753	-1.02733	1.23739	-4.04834	0.000494247	0.00584778	-0.233218
ENSMUSG00000039887	-0.755913	1.31694	-4.04481	0.000498613	0.00589157	-0.257934
ENSMUSG00000097470	-0.748206	1.8863	-4.04469	0.000498753	0.00589157	-0.283417
ENSMUSG00000086350	-1.82105	-0.537684	-4.04419	0.000499382	0.00589227	-0.0510274
ENSMUSG00000055065	-0.359668	9.29075	-4.04399	0.000499632	0.00589227	-1.05747
ENSMUSG00000006412	0.569882	4.42634	4.04367	0.000500021	0.00589227	-0.911126
ENSMUSG00000023809	-0.480612	3.77676	-4.04314	0.000500689	0.0058954	-0.722226
ENSMUSG00000000339	0.338492	4.11923	4.0414	0.000502856	0.00591187	-0.878424
ENSMUSG00000040498	-0.890285	0.40366	-4.04102	0.000503334	0.00591187	-0.238488
ENSMUSG00000074794	-0.826354	4.42317	-4.0408	0.000503616	0.00591187	-0.842134
ENSMUSG00000047604	0.686489	4.36117	4.04043	0.00050408	0.00591187	-0.883884
ENSMUSG00000000631	-0.829079	5.74605	-4.04041	0.00050411	0.00591187	-1.02877
ENSMUSG00000022416	2.92669	-0.44042	4.03827	0.000506797	0.00593862	-0.0638522
ENSMUSG00000001127	-0.328028	7.48397	-4.03787	0.0005073	0.00593976	-1.11265
ENSMUSG00000026353	0.491531	6.63838	4.03377	0.000512506	0.00599591	-1.12112
ENSMUSG00000060397	-0.782837	2.12276	-4.03321	0.000513222	0.00599948	-0.372175
ENSMUSG00000053964	0.4593	3.79666	4.03217	0.000514559	0.00601031	-0.786053
ENSMUSG00000050394	-1.81206	-1.12542	-4.02996	0.000517398	0.00603865	-0.100517
ENSMUSG00000024781	-0.339612	6.29011	-4.02835	0.000519477	0.00605808	-1.12842
ENSMUSG00000084997	-2.14329	-0.516443	-4.02763	0.000520407	0.00605862	-0.104609
ENSMUSG00000039713	-1.12961	1.84869	-4.02752	0.000520556	0.00605862	-0.255209
ENSMUSG00000034349	-0.489679	9.27514	-4.02736	0.000520767	0.00605862	-1.09135
ENSMUSG00000021823	1.1702	1.16765	4.02664	0.000521692	0.00606457	-0.362843
ENSMUSG00000030471	0.426996	4.96757	4.02542	0.000523283	0.00607824	-1.0233
ENSMUSG00000001416	0.429286	7.1839	4.02463	0.000524319	0.00608425	-1.14496
ENSMUSG00000052395	-0.741646	3.84779	-4.02426	0.000524794	0.00608425	-0.754312
ENSMUSG00000020893	0.408349	6.20415	4.02384	0.000525346	0.00608425	-1.13178
ENSMUSG00000032038	0.367077	5.34327	4.02359	0.000525668	0.00608425	-1.02766
ENSMUSG00000060336	0.379096	2.50185	4.02343	0.000525881	0.00608425	-0.815779
ENSMUSG00000049109	-0.428672	8.0414	-4.02134	0.000528628	0.00610727	-1.13952
ENSMUSG00000014453	1.26968	0.818467	4.02128	0.000528706	0.00610727	-0.206411
ENSMUSG00000036687	2.92019	-3.13838	4.01969	0.0005308	0.00612265	-0.344738
ENSMUSG00000073414	2.80314	-3.49611	4.01964	0.000530875	0.00612265	-0.301679
ENSMUSG00000022723	0.430911	3.70218	4.01913	0.000531541	0.00612549	-0.814676
ENSMUSG00000097404	-1.00485	1.06187	-4.0177	0.00053344	0.00614255	-0.260947
ENSMUSG00000054823	0.342335	8.9181	4.01723	0.000534063	0.00614488	-1.12927
ENSMUSG00000028678	-1.73511	-0.905089	-4.01523	0.000536739	0.00616703	-0.116766
ENSMUSG00000066278	0.519221	7.58745	4.01516	0.000536832	0.00616703	-1.16622
ENSMUSG00000030313	1.94451	0.33868	4.01346	0.000539098	0.0061882	-0.171694
ENSMUSG00000046532	0.547917	4.59662	4.01276	0.000540047	0.00619424	-0.994887
ENSMUSG00000071659	0.272799	8.77201	4.01138	0.000541904	0.00621066	-1.14952
ENSMUSG00000024403	-1.00236	1.76967	-4.00982	0.000544018	0.00623001	-0.503681
ENSMUSG00000005774	-0.672508	5.02509	-4.00941	0.00054457	0.00623145	-1.02242
ENSMUSG00000039377	2.10192	-2.52158	4.00846	0.000545856	0.00624128	-0.194242
ENSMUSG00000034285	-0.404358	4.4928	-4.00794	0.000546558	0.00624443	-0.959541
ENSMUSG00000021285	0.408603	6.64134	4.00602	0.00054918	0.00626948	-1.19101
ENSMUSG00000037548	0.699154	3.46278	4.00525	0.000550238	0.00627666	-0.665772
ENSMUSG00000038538	0.492032	7.24262	4.00411	0.000551798	0.00628955	-1.19673
ENSMUSG00000005043	-0.66212	6.06287	-4.00236	0.000554214	0.00631217	-1.16635
ENSMUSG00000039474	-0.79701	1.4487	-3.99668	0.000562098	0.00638239	-0.378464
ENSMUSG00000012429	-0.350054	4.50476	-3.9966	0.000562219	0.00638239	-1.0207
ENSMUSG00000066595	0.292182	4.9388	3.99655	0.00056229	0.00638239	-1.12884
ENSMUSG00000069270	3.14265	-2.60039	3.99628	0.000562662	0.00638239	-0.341657
ENSMUSG00000033460	-1.77289	-0.699269	-3.99619	0.000562784	0.00638239	-0.160583
ENSMUSG00000067825	0.524983	4.44586	3.99604	0.000562998	0.00638239	-1.04027
ENSMUSG00000040374	-0.445309	4.51387	-3.99131	0.000569666	0.00645298	-1.01397
ENSMUSG00000032400	-0.652134	2.32777	-3.99061	0.00057066	0.00645894	-0.486189
ENSMUSG00000006705	0.363357	6.46142	3.99032	0.000571076	0.00645894	-1.23035
ENSMUSG00000056596	1.32509	3.83254	3.9892	0.000572666	0.00647193	-0.798757
ENSMUSG00000074671	-0.412124	5.62226	-3.98719	0.000575542	0.00649941	-1.18252
ENSMUSG00000039994	-0.550409	5.85224	-3.98636	0.000576719	0.00650767	-1.16194
ENSMUSG00000022442	0.612951	2.38215	3.98565	0.000577743	0.00650936	-0.656225
ENSMUSG00000038991	-0.315673	5.89162	-3.98544	0.000578047	0.00650936	-1.19429
ENSMUSG00000030795	-0.572784	8.94311	-3.98533	0.000578204	0.00650936	-1.22068
ENSMUSG00000045639	-0.825588	2.40917	-3.98429	0.000579704	0.00651815	-0.582391
ENSMUSG00000064145	0.267665	6.50271	3.98402	0.000580088	0.00651815	-1.23756
ENSMUSG00000020088	-0.338016	6.59083	-3.98386	0.000580322	0.00651815	-1.24135
ENSMUSG00000043411	0.299752	7.72919	3.98323	0.000581238	0.00652343	-1.24478
ENSMUSG00000015994	-0.402513	5.37101	-3.98066	0.000584969	0.00656026	-1.15687
ENSMUSG00000017897	-0.412083	4.5423	-3.97836	0.000588329	0.00659289	-1.10234
ENSMUSG00000085786	2.41148	-1.44436	3.97613	0.000591598	0.00661878	-0.296258
ENSMUSG00000040268	0.336349	6.34336	3.97568	0.000592253	0.00661878	-1.25692
ENSMUSG00000059326	0.804377	2.67974	3.97557	0.000592415	0.00661878	-0.60078
ENSMUSG00000044957	1.39239	-0.789085	3.97555	0.000592449	0.00661878	-0.212127
ENSMUSG00000091994	-1.06397	1.8983	-3.97198	0.000597735	0.00667273	-0.454858
ENSMUSG00000055900	0.471529	4.15984	3.97136	0.000598654	0.00667789	-1.02188
ENSMUSG00000086401	-1.00748	1.17117	-3.96969	0.000601146	0.00670058	-0.377892
ENSMUSG00000097292	-2.80884	-2.1997	-3.96757	0.000604326	0.0067309	-0.393196
ENSMUSG00000005501	-0.508486	4.34874	-3.9654	0.000607598	0.00676219	-1.06444
ENSMUSG00000030522	-0.454656	4.22615	-3.96499	0.000608222	0.00676294	-0.991958
ENSMUSG00000036968	0.438559	4.22844	3.96474	0.00060859	0.00676294	-1.07799
ENSMUSG00000025931	-0.597204	2.38228	-3.96271	0.000611684	0.00679215	-0.743991
ENSMUSG00000097667	1.18002	1.18912	3.96169	0.00061323	0.00680415	-0.455884
ENSMUSG00000072437	0.635004	3.47175	3.96088	0.000614467	0.00681271	-0.952147
ENSMUSG00000057842	-0.621524	4.91201	-3.96051	0.000615033	0.00681382	-1.1335
ENSMUSG00000061436	0.983806	5.50145	3.96018	0.000615535	0.00681422	-1.2559
ENSMUSG00000053137	0.520729	2.90885	3.95978	0.000616148	0.00681585	-0.812758
ENSMUSG00000039461	-0.814278	3.51221	-3.95877	0.000617706	0.0068245	-0.888005
ENSMUSG00000034675	2.11753	-1.58771	3.95839	0.000618283	0.0068245	-0.307992
ENSMUSG00000026018	1.26531	0.00683768	3.95836	0.00061833	0.0068245	-0.29088
ENSMUSG00000039917	-0.523787	5.08792	-3.95353	0.000625802	0.00690175	-1.18562
ENSMUSG00000035530	0.515675	8.6231	3.95187	0.000628385	0.00692027	-1.29446
ENSMUSG00000040446	-0.548075	4.16323	-3.95185	0.000628428	0.00692027	-1.02044
ENSMUSG00000030247	2.70446	-1.67297	3.95054	0.000630477	0.00693762	-0.327232
ENSMUSG00000029028	0.330436	6.46564	3.94754	0.000635184	0.00697998	-1.32602
ENSMUSG00000082946	1.71196	0.671421	3.94748	0.000635282	0.00697998	-0.266836
ENSMUSG00000048175	-0.344534	4.36532	-3.94672	0.000636492	0.00698803	-1.1138
ENSMUSG00000016559	-0.414659	8.34913	-3.94551	0.000638402	0.00700374	-1.32938
ENSMUSG00000053706	-1.45961	0.277205	-3.94314	0.000642178	0.00703573	-0.342626
ENSMUSG00000040749	-1.05386	0.836535	-3.94308	0.00064228	0.00703573	-0.387271
ENSMUSG00000021678	0.493827	6.16399	3.93987	0.000647417	0.00708171	-1.35085
ENSMUSG00000043243	0.508709	3.21296	3.93985	0.000647446	0.00708171	-0.767688
ENSMUSG00000033863	0.818742	-0.355308	3.93955	0.000647939	0.00708181	-0.671266
ENSMUSG00000078349	-0.829864	4.29753	-3.93785	0.000650685	0.00710495	-1.01607
ENSMUSG00000040022	-0.524706	4.52598	-3.9375	0.000651248	0.00710495	-1.17742
ENSMUSG00000022865	1.18991	-0.238017	3.93719	0.000651745	0.00710495	-0.30089
ENSMUSG00000042505	-0.613855	1.79929	-3.93703	0.000652	0.00710495	-0.588863
ENSMUSG00000037525	-0.539499	3.23472	-3.93524	0.000654906	0.00712751	-0.895908
ENSMUSG00000028937	0.766408	2.2764	3.93516	0.000655044	0.00712751	-0.819081
ENSMUSG00000030329	1.58774	0.147686	3.9334	0.000657907	0.00715334	-0.305309
ENSMUSG00000026525	-1.34069	-0.700975	-3.93289	0.000658747	0.00715714	-0.297014
ENSMUSG00000036120	0.271934	5.0597	3.93199	0.000660221	0.00716206	-1.27753
ENSMUSG00000008734	-0.470226	2.54363	-3.93183	0.00066048	0.00716206	-1.02452
ENSMUSG00000048807	1.47523	-0.89099	3.93172	0.000660669	0.00716206	-0.302823
ENSMUSG00000047002	-2.33533	-1.38095	-3.93094	0.000661944	0.00717057	-0.425711
ENSMUSG00000093682	-2.52534	-1.23381	-3.92955	0.000664239	0.0071901	-0.413033
ENSMUSG00000034928	-0.234414	7.73394	-3.92782	0.000667104	0.00721578	-1.38004
ENSMUSG00000085615	-1.01833	0.779631	-3.92621	0.000669777	0.00723934	-0.484307
ENSMUSG00000086013	-0.790369	1.27698	-3.9252	0.000671462	0.00725219	-0.510321
ENSMUSG00000040264	0.458005	5.23845	3.92378	0.000673825	0.00726831	-1.3195
ENSMUSG00000086889	-1.6489	0.622316	-3.92371	0.000673949	0.00726831	-0.346183
ENSMUSG00000000957	-2.18189	-0.638795	-3.92306	0.000675039	0.00726936	-0.370665
ENSMUSG00000022391	0.405737	6.8086	3.92306	0.000675041	0.00726936	-1.39623
ENSMUSG00000029570	-0.583637	8.52434	-3.92233	0.000676266	0.0072772	-1.37789
ENSMUSG00000044224	0.463533	5.20073	3.92064	0.0006791	0.00730232	-1.30285
ENSMUSG00000024240	0.241559	6.77146	3.91962	0.000680839	0.00731564	-1.40194
ENSMUSG00000004328	-1.7093	-1.10014	-3.9185	0.000682727	0.00733055	-0.330286
ENSMUSG00000097344	0.945685	2.52123	3.9167	0.000685781	0.00735793	-0.752881
ENSMUSG00000056204	-0.70002	1.88373	-3.91107	0.000695446	0.00745616	-0.698977
ENSMUSG00000034459	-0.809257	3.80654	-3.90979	0.000697658	0.00747439	-1.115
ENSMUSG00000041653	1.84865	-1.57174	3.90837	0.000700125	0.00749533	-0.354503
ENSMUSG00000048310	-0.488258	5.38922	-3.90667	0.000703079	0.00752145	-1.3406
ENSMUSG00000021573	0.973256	0.545332	3.90432	0.000707199	0.00756	-0.703056
ENSMUSG00000026617	0.608303	4.16594	3.90388	0.000707967	0.00756268	-1.23609
ENSMUSG00000087168	-0.711322	2.28778	-3.90224	0.000710868	0.00758813	-0.818519
ENSMUSG00000042742	-0.434947	5.18418	-3.90048	0.000713973	0.00761571	-1.35224
ENSMUSG00000028851	0.434542	6.10278	3.90009	0.000714668	0.00761757	-1.43471
ENSMUSG00000028565	0.945522	1.81244	3.89851	0.000717472	0.00764189	-0.918185
ENSMUSG00000032946	-0.42901	8.94888	-3.89774	0.000718842	0.00765091	-1.43338
ENSMUSG00000059013	-0.358575	6.71977	-3.89631	0.000721413	0.00767268	-1.45548
ENSMUSG00000097423	1.07849	1.43742	3.89412	0.000725347	0.00770892	-0.603947
ENSMUSG00000083364	0.698462	4.65128	3.89363	0.000726227	0.00771267	-1.28671
ENSMUSG00000058558	0.436389	8.94237	3.89277	0.000727783	0.00772359	-1.42489
ENSMUSG00000017858	-0.288481	5.39704	-3.89107	0.000730858	0.00775059	-1.38804
ENSMUSG00000025330	-2.43163	-2.25271	-3.8892	0.000734254	0.00777777	-0.596299
ENSMUSG00000036435	-0.439348	5.74143	-3.88848	0.000735573	0.00777777	-1.40519
ENSMUSG00000097414	0.510031	3.9933	3.88845	0.000735623	0.00777777	-1.12222
ENSMUSG00000032656	0.781546	1.83619	3.88832	0.000735861	0.00777777	-0.836977
ENSMUSG00000020268	-0.479143	3.971	-3.8882	0.00073608	0.00777777	-1.07367
ENSMUSG00000032494	-0.887987	2.20621	-3.88779	0.00073683	0.00778007	-0.708531
ENSMUSG00000008193	1.29832	2.08803	3.88516	0.000741661	0.00782544	-0.704396
ENSMUSG00000037348	-0.310009	5.87087	-3.88422	0.000743379	0.00783791	-1.44229
ENSMUSG00000013150	0.463781	3.08853	3.88338	0.000744943	0.00784873	-1.09332
ENSMUSG00000044103	-1.39778	-0.377206	-3.88242	0.00074671	0.00786169	-0.434205
ENSMUSG00000028965	-0.961851	2.83658	-3.88142	0.000748562	0.00787551	-0.929444
ENSMUSG00000085884	2.10985	-1.8432	3.88082	0.00074968	0.00787803	-0.436939
ENSMUSG00000064337	1.32491	8.91985	3.88072	0.000749878	0.00787803	-1.46999
ENSMUSG00000066042	-0.70876	2.91104	-3.88016	0.00075091	0.00787896	-0.957963
ENSMUSG00000048027	0.465219	3.6006	3.88009	0.000751044	0.00787896	-1.22046
ENSMUSG00000053965	-1.64063	0.434418	-3.87956	0.000752035	0.0078837	-0.428632
ENSMUSG00000037331	0.257455	8.54224	3.87897	0.000753141	0.00788542	-1.47893
ENSMUSG00000027276	2.78922	-2.50793	3.87889	0.000753278	0.00788542	-0.531247
ENSMUSG00000037395	0.528761	3.80199	3.87767	0.000755567	0.00790373	-1.16747
ENSMUSG00000048911	0.653428	2.798	3.87395	0.000762574	0.00797132	-0.923973
ENSMUSG00000005103	-0.27457	8.41356	-3.86707	0.000775704	0.00810212	-1.50864
ENSMUSG00000078160	1.72533	0.910518	3.86655	0.000776701	0.00810212	-0.50983
ENSMUSG00000027852	-0.321588	7.51094	-3.86653	0.000776748	0.00810212	-1.53166
ENSMUSG00000070031	0.485675	6.23898	3.86582	0.000778117	0.00811061	-1.52304
ENSMUSG00000027573	-0.244278	5.62661	-3.8635	0.000782599	0.00815152	-1.4756
ENSMUSG00000085538	1.58755	-0.585037	3.85997	0.000789478	0.00821423	-0.481576
ENSMUSG00000035790	0.379264	3.84905	3.85946	0.000790474	0.00821423	-1.29344
ENSMUSG00000031016	-1.14052	0.0841087	-3.85927	0.000790859	0.00821423	-0.536457
ENSMUSG00000022094	0.32893	5.24559	3.85926	0.000790867	0.00821423	-1.4871
ENSMUSG00000086359	-1.15282	1.33384	-3.85734	0.000794642	0.00824758	-0.634425
ENSMUSG00000030402	1.4281	1.07681	3.85627	0.000796751	0.00826361	-0.530848
ENSMUSG00000020189	-0.358631	7.33666	-3.85562	0.000798051	0.00827123	-1.55865
ENSMUSG00000054901	-2.28883	-1.42963	-3.85472	0.000799831	0.00828381	-0.603477
ENSMUSG00000032867	0.414662	3.66226	3.85041	0.000808426	0.00836163	-1.2683
ENSMUSG00000081851	0.859413	1.07941	3.85038	0.000808489	0.00836163	-0.673422
ENSMUSG00000097123	-1.24201	0.651353	-3.84938	0.000810496	0.00837646	-0.542351
ENSMUSG00000095432	-0.560756	4.97257	-3.84667	0.000815947	0.00842685	-1.44289
ENSMUSG00000069089	-0.290358	5.69063	-3.84605	0.000817204	0.00843387	-1.52524
ENSMUSG00000032462	0.461627	3.96157	3.84315	0.000823097	0.0084887	-1.30809
ENSMUSG00000037370	0.52849	4.36203	3.84251	0.000824406	0.0084962	-1.28042
ENSMUSG00000031505	-0.351611	4.65532	-3.84183	0.000825793	0.0085045	-1.37387
ENSMUSG00000093559	-0.989852	0.799264	-3.84122	0.000827053	0.00851149	-0.627719
ENSMUSG00000030127	-0.302618	5.07747	-3.84025	0.000829032	0.00852585	-1.46285
ENSMUSG00000036006	-0.407051	9.36577	-3.83846	0.000832719	0.00855775	-1.5573
ENSMUSG00000030103	1.67478	-0.201944	3.83461	0.000840714	0.00863385	-0.524384
ENSMUSG00000048118	0.450107	8.04672	3.83393	0.000842132	0.00864235	-1.60643
ENSMUSG00000040018	-0.374103	4.92009	-3.83128	0.000847678	0.00869316	-1.46799
ENSMUSG00000012640	-0.390581	5.38974	-3.83088	0.000848517	0.00869567	-1.53787
ENSMUSG00000037720	0.701453	5.62411	3.82969	0.000851024	0.00870816	-1.58799
ENSMUSG00000020178	0.510214	4.1389	3.82962	0.000851176	0.00870816	-1.32139
ENSMUSG00000027239	0.97725	1.82661	3.82931	0.000851826	0.00870816	-0.774551
ENSMUSG00000028423	-0.291799	7.34463	-3.82917	0.000852118	0.00870816	-1.62348
ENSMUSG00000024002	0.391487	8.25664	3.8287	0.000853106	0.00871217	-1.61189
ENSMUSG00000038371	0.546425	2.9995	3.82785	0.000854921	0.00872461	-1.14421
ENSMUSG00000092187	-1.8143	-0.645716	-3.82754	0.000855575	0.00872488	-0.528138
ENSMUSG00000019804	0.544872	5.91055	3.82721	0.000856276	0.00872488	-1.61251
ENSMUSG00000086477	-1.62644	-0.450738	-3.82699	0.000856738	0.00872488	-0.532691
ENSMUSG00000001333	3.18036	-2.26043	3.82607	0.000858692	0.0087387	-0.657286
ENSMUSG00000078306	-0.752831	1.52961	-3.82499	0.000860996	0.00875395	-0.815911
ENSMUSG00000043061	-0.346344	4.94926	-3.8248	0.000861388	0.00875395	-1.48621
ENSMUSG00000022358	-0.346907	5.43296	-3.82437	0.000862305	0.00875719	-1.56342
ENSMUSG00000026199	-0.332311	5.79002	-3.82285	0.000865576	0.00878431	-1.57793
ENSMUSG00000030207	-0.333492	5.18215	-3.82175	0.000867928	0.00879173	-1.52819
ENSMUSG00000084992	-0.757727	1.56997	-3.8217	0.000868031	0.00879173	-0.891805
ENSMUSG00000052852	-2.44617	-0.680204	-3.82166	0.000868111	0.00879173	-0.553511
ENSMUSG00000022021	-0.758457	0.883557	-3.81993	0.00087185	0.00882349	-0.84416
ENSMUSG00000038872	0.768684	1.07268	3.81544	0.000881601	0.008916	-0.868319
ENSMUSG00000040249	1.47688	-0.784502	3.81388	0.000885001	0.0089442	-0.566162
ENSMUSG00000020283	0.365865	4.04092	3.81165	0.000889911	0.00898761	-1.40405
ENSMUSG00000026273	-0.403839	3.43196	-3.81092	0.000891517	0.00899285	-1.21592
ENSMUSG00000053716	-0.357084	5.55291	-3.81086	0.00089166	0.00899285	-1.64731
ENSMUSG00000051224	-0.618375	3.47956	-3.81048	0.000892493	0.00899505	-1.19984
ENSMUSG00000043505	-0.292527	7.06692	-3.81004	0.000893467	0.00899867	-1.66988
ENSMUSG00000059923	0.284867	7.14305	3.80729	0.000899577	0.00905397	-1.67815
ENSMUSG00000037622	0.312768	6.09653	3.80675	0.000900784	0.00905987	-1.66428
ENSMUSG00000075419	-0.597721	3.01896	-3.80592	0.000902624	0.00907215	-1.18766
ENSMUSG00000055447	-0.30103	8.37005	-3.80512	0.000904419	0.00907434	-1.66621
ENSMUSG00000045205	-0.533409	4.93333	-3.80508	0.000904499	0.00907434	-1.51029
ENSMUSG00000047213	-0.401613	7.16103	-3.80499	0.000904704	0.00907434	-1.68158
ENSMUSG00000020395	-0.256277	9.47878	-3.80449	0.000905831	0.00907924	-1.62869
ENSMUSG00000034007	0.439976	5.07121	3.80422	0.000906434	0.00907924	-1.59366
ENSMUSG00000024891	0.730258	1.9376	3.80336	0.000908365	0.00909236	-0.996992
ENSMUSG00000028790	-0.322764	7.87007	-3.80153	0.000912489	0.00912739	-1.68228
ENSMUSG00000023505	-0.968203	1.36555	-3.80093	0.000913848	0.00913474	-0.823614
ENSMUSG00000022684	-0.28157	6.17245	-3.79917	0.000917828	0.00916289	-1.67141
ENSMUSG00000076480	0.385413	2.15648	3.79913	0.000917918	0.00916289	-1.43759
ENSMUSG00000024036	0.337361	6.41109	3.7984	0.000919587	0.00917329	-1.68691
ENSMUSG00000005696	-0.482889	4.13405	-3.79379	0.000930143	0.00927227	-1.45661
ENSMUSG00000092341	0.950192	11.585	3.79262	0.00093284	0.00929282	-1.57464
ENSMUSG00000035329	0.447768	5.49387	3.79165	0.000935069	0.00930753	-1.64527
ENSMUSG00000034586	0.284644	6.91325	3.7914	0.000935662	0.00930753	-1.71704
ENSMUSG00000030220	-0.337517	9.85622	-3.79115	0.000936226	0.00930753	-1.65178
ENSMUSG00000099137	0.697643	2.79161	3.79059	0.000937528	0.00931389	-1.13041
ENSMUSG00000026489	-0.459642	3.81466	-3.79033	0.00093814	0.00931389	-1.35059
ENSMUSG00000024556	-0.28754	6.05312	-3.78933	0.00094046	0.00933059	-1.69472
ENSMUSG00000087259	-0.559612	1.80748	-3.78853	0.000942326	0.00934276	-1.34349
ENSMUSG00000001156	0.327437	4.90332	3.78711	0.000945649	0.00936936	-1.60411
ENSMUSG00000025264	-0.324969	4.69158	-3.78591	0.000948444	0.00938583	-1.53028
ENSMUSG00000097732	-0.97766	-0.218967	-3.78585	0.000948595	0.00938583	-0.802484
ENSMUSG00000031960	-0.343666	6.26392	-3.78525	0.000949991	0.00938876	-1.71332
ENSMUSG00000032667	0.429548	5.25788	3.78511	0.000950331	0.00938876	-1.63456
ENSMUSG00000031995	0.946081	0.348806	3.7849	0.000950817	0.00938876	-0.758578
ENSMUSG00000073725	-0.30376	5.27853	-3.78426	0.000952323	0.00939103	-1.63545
ENSMUSG00000097417	1.56761	3.74139	3.78426	0.000952332	0.00939103	-1.45764
ENSMUSG00000042726	0.28159	5.25294	3.78368	0.000953706	0.00939825	-1.6724
ENSMUSG00000031292	-1.23752	0.215946	-3.78319	0.000954856	0.00940156	-0.726207
ENSMUSG00000022799	-0.361234	4.39506	-3.78299	0.000955328	0.00940156	-1.67049
ENSMUSG00000068141	-1.35745	3.71869	-3.78221	0.000957176	0.00941341	-1.23202
ENSMUSG00000028248	-0.447626	8.52735	-3.78151	0.000958823	0.00942327	-1.72853
ENSMUSG00000079478	0.562785	4.4039	3.78041	0.000961453	0.00944106	-1.5651
ENSMUSG00000030823	-0.645065	2.96846	-3.78021	0.000961924	0.00944106	-1.23155
ENSMUSG00000097050	-3.279	-1.95788	-3.77901	0.000964777	0.00946271	-0.782614
ENSMUSG00000033629	-0.3601	5.88164	-3.77822	0.000966656	0.00947478	-1.71507
ENSMUSG00000097518	-0.798225	1.77303	-3.77733	0.000968806	0.00948949	-0.937336
ENSMUSG00000053253	0.434974	5.58222	3.77674	0.00097021	0.009495	-1.70193
ENSMUSG00000051721	0.571462	2.95746	3.77655	0.000970666	0.009495	-1.28446
ENSMUSG00000008307	1.09937	0.440906	3.77403	0.00097673	0.00954793	-0.737123
ENSMUSG00000027287	0.465376	5.01421	3.77252	0.000980388	0.00957728	-1.65873
ENSMUSG00000024669	-0.268495	7.60499	-3.77204	0.000981547	0.00958199	-1.76212
ENSMUSG00000097309	-0.819313	0.524502	-3.77178	0.000982181	0.00958199	-0.892048
ENSMUSG00000026634	-0.296476	6.62563	-3.76921	0.000988448	0.00963142	-1.75764
ENSMUSG00000031077	-0.407714	4.1069	-3.76916	0.000988564	0.00963142	-1.47924
ENSMUSG00000027368	0.706289	6.86319	3.76886	0.000989307	0.00963224	-1.76734
ENSMUSG00000001082	0.515737	3.76453	3.76852	0.000990123	0.00963377	-1.50278
ENSMUSG00000053046	1.9668	-2.03432	3.76764	0.000992282	0.00964836	-0.678251
ENSMUSG00000074182	0.490184	4.26255	3.76735	0.000993004	0.00964896	-1.50637
ENSMUSG00000070385	-0.555516	4.40801	-3.76689	0.000994133	0.00965352	-1.41825
ENSMUSG00000001018	-0.356204	5.15438	-3.76561	0.000997275	0.00967761	-1.66544
ENSMUSG00000087088	-0.973986	0.651804	-3.76484	0.000999178	0.00968964	-0.814493
ENSMUSG00000020476	-0.294138	7.36575	-3.76412	0.00100097	0.0097006	-1.78105
ENSMUSG00000098197	-0.937028	1.039	-3.76203	0.00100614	0.00974421	-0.850221
ENSMUSG00000051705	-0.747322	1.90724	-3.76164	0.00100713	0.00974737	-1.05564
ENSMUSG00000015961	-0.263136	6.63112	-3.76107	0.00100853	0.00975443	-1.78683
ENSMUSG00000026918	-0.323198	6.19768	-3.75865	0.00101459	0.00980661	-1.77075
ENSMUSG00000001751	-0.767195	4.06859	-3.75836	0.00101532	0.00980714	-1.49495
ENSMUSG00000026285	-1.23655	-0.26239	-3.75645	0.00102013	0.00984713	-0.724725
ENSMUSG00000078599	0.448595	3.03191	3.75583	0.00102169	0.00985569	-1.31761
ENSMUSG00000043384	0.523521	6.56449	3.75279	0.00102938	0.00992327	-1.79477
ENSMUSG00000024926	-0.312297	5.30623	-3.74935	0.00103818	0.0100015	-1.7088
ENSMUSG00000014905	0.503767	4.94864	3.74876	0.00103968	0.0100094	-1.67543
ENSMUSG00000025647	-0.334992	11.0523	-3.74794	0.0010418	0.0100233	-1.71556
ENSMUSG00000024030	-0.482768	6.53199	-3.74512	0.00104908	0.0100866	-1.81501
ENSMUSG00000026455	-0.324091	4.62313	-3.74467	0.00105025	0.0100913	-1.64436
ENSMUSG00000022952	-0.442576	5.63243	-3.74305	0.00105446	0.0101251	-1.76988
ENSMUSG00000021192	-0.365481	5.64763	-3.74231	0.0010564	0.010137	-1.77294
ENSMUSG00000021567	2.34364	-1.73381	3.74029	0.00106166	0.0101808	-0.724793
ENSMUSG00000031390	-0.59819	3.72836	-3.73929	0.00106429	0.0101993	-1.44628
ENSMUSG00000097122	1.19918	0.913529	3.73863	0.00106604	0.0102082	-0.892552
ENSMUSG00000017210	-0.479766	5.96164	-3.73841	0.00106662	0.0102082	-1.79609
ENSMUSG00000028060	-0.242088	6.81265	-3.73808	0.00106749	0.0102099	-1.84216
ENSMUSG00000028608	-0.291306	5.37207	-3.73666	0.00107123	0.0102328	-1.74523
ENSMUSG00000085453	1.07307	1.21396	3.73663	0.00107131	0.0102328	-0.996477
ENSMUSG00000020451	-0.38995	6.85803	-3.73638	0.00107198	0.0102328	-1.84393
ENSMUSG00000044966	-1.12514	1.11286	-3.73514	0.00107527	0.010255	-0.865014
ENSMUSG00000027985	-0.345075	9.03352	-3.73497	0.00107571	0.010255	-1.81204
ENSMUSG00000005540	1.20176	1.54869	3.73351	0.0010796	0.0102766	-0.966169
ENSMUSG00000030031	-0.442794	4.10981	-3.73348	0.00107968	0.0102766	-1.58778
ENSMUSG00000074578	0.545709	5.03984	3.73333	0.00108009	0.0102766	-1.7597
ENSMUSG00000011008	-0.560152	4.6265	-3.73227	0.00108291	0.0102968	-1.62003
ENSMUSG00000013495	-0.455026	4.35335	-3.73105	0.00108617	0.0103189	-1.58172
ENSMUSG00000078580	-0.482093	2.99688	-3.73088	0.00108664	0.0103189	-1.32947
ENSMUSG00000039328	0.455855	4.23158	3.73042	0.00108786	0.0103237	-1.63031
ENSMUSG00000084821	1.5986	-0.950503	3.72934	0.00109076	0.0103445	-0.748349
ENSMUSG00000014158	-1.96542	-1.6922	-3.72687	0.00109744	0.0104012	-0.746844
ENSMUSG00000097743	0.4028	4.20192	3.72509	0.00110228	0.0104402	-1.60346
ENSMUSG00000022353	-0.460865	5.70199	-3.72385	0.00110566	0.0104654	-1.79685
ENSMUSG00000024271	-0.266716	6.42399	-3.72342	0.00110684	0.0104699	-1.86779
ENSMUSG00000001436	-0.336691	4.46193	-3.72306	0.00110782	0.0104724	-1.68975
ENSMUSG00000029185	0.784099	-0.422847	3.72275	0.00110867	0.0104736	-1.0534
ENSMUSG00000015937	-0.350943	7.67606	-3.72178	0.0011113	0.0104917	-1.87986
ENSMUSG00000048349	1.20722	-0.709406	3.71979	0.00111679	0.0105368	-0.835527
ENSMUSG00000085962	-2.44101	-1.51041	-3.71934	0.00111802	0.0105415	-0.798538
ENSMUSG00000033004	0.673214	9.13655	3.71778	0.00112235	0.0105756	-1.83924
ENSMUSG00000022351	0.531408	4.12123	3.71714	0.00112412	0.0105854	-1.72312
ENSMUSG00000062511	0.798044	2.58406	3.7152	0.00112952	0.0106294	-1.29292
ENSMUSG00000022744	0.539419	4.53704	3.71278	0.00113628	0.0106862	-1.71675
ENSMUSG00000026470	-0.246877	5.4575	-3.71181	0.00113901	0.0106974	-1.83968
ENSMUSG00000032519	0.465332	4.61207	3.71157	0.00113966	0.0106974	-1.75241
ENSMUSG00000024597	0.552595	3.83719	3.71157	0.00113967	0.0106974	-1.6916
ENSMUSG00000039438	2.5201	-2.68675	3.71111	0.00114096	0.0107026	-0.844425
ENSMUSG00000053536	-0.3837	6.06595	-3.71083	0.00114174	0.0107031	-1.88189
ENSMUSG00000028680	0.522084	3.98991	3.7074	0.00115145	0.0107761	-1.58055
ENSMUSG00000045087	2.63022	-3.21899	3.70739	0.00115149	0.0107761	-0.868885
ENSMUSG00000036820	-0.539914	3.08071	-3.7073	0.00115174	0.0107761	-1.46072
ENSMUSG00000060678	2.45302	-1.79629	3.70677	0.00115325	0.0107834	-0.79977
ENSMUSG00000029447	0.373611	6.87938	3.70611	0.00115513	0.010794	-1.92355
ENSMUSG00000022843	-0.690107	2.77463	-3.70547	0.00115694	0.010804	-1.3224
ENSMUSG00000085287	-0.649956	0.91149	-3.70517	0.0011578	0.0108051	-0.9997
ENSMUSG00000083563	2.2858	5.13202	3.7046	0.00115943	0.0108135	-0.797453
ENSMUSG00000001687	0.347995	5.76383	3.70401	0.00116113	0.010822	-1.8953
ENSMUSG00000007476	-0.299234	6.47099	-3.70354	0.00116248	0.010822	-1.90902
ENSMUSG00000098148	-0.499501	4.59647	-3.7034	0.00116287	0.010822	-1.69626
ENSMUSG00000041809	-1.56078	-2.32475	-3.70325	0.0011633	0.010822	-0.821048
ENSMUSG00000090330	-0.414875	4.67771	-3.7025	0.00116546	0.0108352	-1.73193
ENSMUSG00000042500	2.32358	-1.64811	3.70218	0.00116637	0.0108367	-0.905611
ENSMUSG00000045636	-2.70217	2.50121	-3.70187	0.00116727	0.0108382	-0.974709
ENSMUSG00000047180	-0.448767	7.38465	-3.70086	0.00117017	0.0108582	-1.93361
ENSMUSG00000053119	-0.268712	5.96194	-3.70013	0.00117228	0.010871	-1.90435
ENSMUSG00000031631	-0.425516	5.37211	-3.6962	0.00118372	0.01097	-1.86003
ENSMUSG00000098557	0.461176	4.11971	3.69482	0.00118775	0.0110004	-1.69119
ENSMUSG00000043257	-0.491519	5.56304	-3.69352	0.00119155	0.0110286	-1.86317
ENSMUSG00000014601	-0.303958	6.03532	-3.69284	0.00119356	0.0110403	-1.90801
ENSMUSG00000020793	1.41765	-1.08447	3.69007	0.00120173	0.0111086	-0.830935
ENSMUSG00000002416	-0.319028	3.94848	-3.68982	0.00120247	0.0111086	-1.65662
ENSMUSG00000032611	0.965878	1.08863	3.68879	0.00120552	0.0111297	-1.13475
ENSMUSG00000037820	1.76057	-1.13192	3.68773	0.00120866	0.0111517	-0.848414
ENSMUSG00000039849	-0.407587	7.27351	-3.68673	0.00121167	0.011172	-1.96808
ENSMUSG00000020225	0.491788	3.60601	3.68649	0.00121238	0.011172	-1.60491
ENSMUSG00000030177	0.445243	4.56385	3.68621	0.00121321	0.0111725	-1.73827
ENSMUSG00000027865	0.381616	4.56254	3.68567	0.00121484	0.0111759	-1.78605
ENSMUSG00000027130	-0.455941	7.67626	-3.68558	0.0012151	0.0111759	-1.96902
ENSMUSG00000027589	-0.251866	6.66407	-3.6845	0.00121835	0.0111951	-1.96851
ENSMUSG00000037905	-0.319246	5.53453	-3.68437	0.00121872	0.0111951	-1.86523
ENSMUSG00000026889	0.303731	5.08512	3.68402	0.00121977	0.0111972	-1.8887
ENSMUSG00000037847	0.595628	4.2812	3.68366	0.00122087	0.0111972	-1.70161
ENSMUSG00000022033	-2.70778	-2.80371	-3.68353	0.00122125	0.0111972	-0.965512
ENSMUSG00000098905	-0.441322	3.97725	-3.67836	0.00123691	0.0113275	-1.72448
ENSMUSG00000070733	0.515516	8.61552	3.67833	0.00123701	0.0113275	-1.96348
ENSMUSG00000020017	1.06084	1.33397	3.67767	0.001239	0.0113386	-0.985404
ENSMUSG00000016024	1.13222	-0.684626	3.67705	0.0012409	0.011345	-1.21038
ENSMUSG00000021973	-0.362735	5.75154	-3.67694	0.00124125	0.011345	-1.94855
ENSMUSG00000086111	-1.72631	-1.85336	-3.67633	0.0012431	0.0113548	-0.880104
ENSMUSG00000097828	1.13565	0.337121	3.67337	0.00125222	0.0114274	-1.01385
ENSMUSG00000034157	-0.272306	5.72107	-3.67324	0.00125261	0.0114274	-1.95556
ENSMUSG00000027048	-1.40305	-1.305	-3.6726	0.00125458	0.0114382	-0.884191
ENSMUSG00000042298	0.494057	4.10468	3.67161	0.00125763	0.0114538	-1.73359
ENSMUSG00000030257	0.887782	2.21823	3.67154	0.00125785	0.0114538	-1.31576
ENSMUSG00000038664	0.684743	8.34981	3.67091	0.00125982	0.0114646	-1.98066
ENSMUSG00000037572	-0.318938	4.77119	-3.67049	0.00126113	0.0114665	-1.86794
ENSMUSG00000074215	-0.808968	1.02115	-3.67034	0.0012616	0.0114665	-1.07819
ENSMUSG00000084797	-0.996572	1.0551	-3.66988	0.00126303	0.0114724	-1.06894
ENSMUSG00000032501	0.883211	0.923943	3.66777	0.0012696	0.0115249	-1.17585
ENSMUSG00000031428	0.653465	1.76418	3.66676	0.00127277	0.0115465	-1.42232
ENSMUSG00000035293	-0.372473	5.20998	-3.66638	0.00127396	0.0115466	-1.90146
ENSMUSG00000050471	0.453995	3.95292	3.66625	0.00127436	0.0115466	-1.73057
ENSMUSG00000022897	0.222615	7.35651	3.663	0.00128459	0.0116321	-2.02575
ENSMUSG00000033066	1.70317	-1.76411	3.66042	0.00129279	0.0116991	-0.890737
ENSMUSG00000042787	0.551426	3.61973	3.65924	0.00129655	0.0117179	-1.72614
ENSMUSG00000000326	0.876908	7.27757	3.6592	0.00129666	0.0117179	-2.02351
ENSMUSG00000041684	0.519099	3.38702	3.65901	0.00129727	0.0117179	-1.77966
ENSMUSG00000000148	-0.501884	5.56906	-3.65727	0.00130286	0.0117611	-1.95389
ENSMUSG00000020108	-0.907574	6.37556	-3.65659	0.00130503	0.0117734	-2.02973
ENSMUSG00000035878	-0.856806	1.43397	-3.65522	0.00130945	0.011806	-1.09799
ENSMUSG00000048707	0.436133	3.79041	3.65339	0.00131535	0.0118518	-1.73903
ENSMUSG00000076498	-0.597246	8.18205	-3.65314	0.00131615	0.0118518	-2.03565
ENSMUSG00000097150	-1.2673	-0.266516	-3.65231	0.00131884	0.0118687	-0.929153
ENSMUSG00000086264	-2.45474	-1.78782	-3.65205	0.00131969	0.0118691	-0.95398
ENSMUSG00000064262	-0.289412	8.99257	-3.65079	0.00132379	0.0118986	-2.02489
ENSMUSG00000029174	0.394784	6.45312	3.65013	0.00132595	0.0119107	-2.05572
ENSMUSG00000085408	-0.812321	0.881597	-3.64703	0.00133608	0.0119944	-1.11972
ENSMUSG00000018449	0.502846	4.27823	3.64603	0.0013394	0.0120107	-1.81385
ENSMUSG00000031889	0.323626	4.83688	3.64598	0.00133954	0.0120107	-1.92556
ENSMUSG00000040511	0.481053	4.28282	3.64548	0.00134119	0.0120182	-1.80535
ENSMUSG00000085385	-0.465911	5.90812	-3.64501	0.00134274	0.0120207	-2.01513
ENSMUSG00000041846	0.315338	7.41633	3.6449	0.00134312	0.0120207	-2.06928
ENSMUSG00000097287	-0.536599	2.79925	-3.64463	0.00134402	0.0120214	-1.48683
ENSMUSG00000022335	0.441675	3.22013	3.64248	0.00135112	0.0120775	-1.67936
ENSMUSG00000036168	-1.08672	0.239405	-3.64119	0.00135543	0.0121086	-1.03152
ENSMUSG00000076617	-0.321908	8.28793	-3.63989	0.00135976	0.0121399	-2.06044
ENSMUSG00000071337	-0.418176	6.83342	-3.6386	0.00136411	0.0121712	-2.0731
ENSMUSG00000032398	0.35135	4.23843	3.63671	0.00137046	0.0122205	-1.85781
ENSMUSG00000060301	-0.398986	5.00859	-3.63442	0.00137819	0.0122819	-1.95016
ENSMUSG00000026399	0.533909	7.20973	3.63411	0.00137923	0.0122837	-2.09701
ENSMUSG00000029407	-0.226711	6.88829	-3.63307	0.00138276	0.0123077	-2.09725
ENSMUSG00000000861	2.20557	0.274204	3.63014	0.00139275	0.012389	-0.985753
ENSMUSG00000087371	0.773473	0.691278	3.62779	0.00140084	0.0124534	-1.24983
ENSMUSG00000023902	1.70376	0.216907	3.62724	0.00140272	0.0124626	-0.998788
ENSMUSG00000093565	-1.18414	-0.0167661	-3.62642	0.00140554	0.0124801	-1.0145
ENSMUSG00000032374	-1.66569	0.42956	-3.62584	0.00140755	0.0124873	-0.964256
ENSMUSG00000092400	0.70692	5.71118	3.62569	0.00140807	0.0124873	-2.06229
ENSMUSG00000033961	-0.462672	4.01121	-3.62274	0.00141834	0.0125708	-1.75541
ENSMUSG00000045316	-0.821984	0.996231	-3.621	0.0014244	0.0126169	-1.22129
ENSMUSG00000074643	-0.603814	6.22314	-3.62031	0.00142682	0.0126306	-2.1146
ENSMUSG00000087305	-0.854069	0.483016	-3.62002	0.00142784	0.012632	-1.14749
ENSMUSG00000013707	-0.452544	5.52697	-3.61832	0.00143383	0.0126773	-2.08326
ENSMUSG00000056735	-0.451777	3.53585	-3.61806	0.00143472	0.0126776	-1.74384
ENSMUSG00000082484	2.82024	-2.4437	3.6157	0.00144306	0.0127436	-1.07019
ENSMUSG00000054044	-1.3959	-1.1695	-3.61491	0.00144589	0.0127609	-0.99012
ENSMUSG00000027933	0.311222	6.27141	3.61439	0.00144774	0.0127674	-2.13247
ENSMUSG00000044056	-1.12849	-0.231206	-3.61421	0.00144838	0.0127674	-1.04297
ENSMUSG00000024845	-0.377767	6.47204	-3.61349	0.00145092	0.0127821	-2.12876
ENSMUSG00000038418	-0.368108	6.29739	-3.61166	0.00145747	0.0128321	-2.12553
ENSMUSG00000038178	-0.44628	7.27268	-3.6109	0.00146019	0.0128479	-2.1501
ENSMUSG00000052389	-2.81811	-1.44651	-3.6105	0.00146163	0.0128479	-1.0893
ENSMUSG00000027487	-0.452387	3.66237	-3.61042	0.00146191	0.0128479	-1.75928
ENSMUSG00000050944	-1.73413	-0.91441	-3.60997	0.00146355	0.0128546	-0.998419
ENSMUSG00000034947	0.713018	1.12665	3.60949	0.00146524	0.0128618	-1.30265
ENSMUSG00000034575	0.370746	4.45392	3.60892	0.0014673	0.0128721	-1.99029
ENSMUSG00000035954	-1.17619	1.40041	-3.60867	0.0014682	0.0128722	-1.25935
ENSMUSG00000032349	0.403486	7.23612	3.60815	0.00147011	0.0128813	-2.15587
ENSMUSG00000076431	-0.959785	2.73001	-3.60739	0.00147282	0.01289	-1.63624
ENSMUSG00000038225	-0.382185	5.07251	-3.60738	0.00147286	0.01289	-2.01241
ENSMUSG00000073492	0.706407	4.62274	3.60674	0.00147518	0.0129025	-1.94619
ENSMUSG00000021213	0.46689	2.67823	3.6063	0.00147678	0.0129088	-1.76547
ENSMUSG00000097718	-0.954862	1.99406	-3.60123	0.0014953	0.0130578	-1.41412
ENSMUSG00000028986	0.368289	4.70794	3.60114	0.00149561	0.0130578	-1.9649
ENSMUSG00000027498	-0.257667	5.46026	-3.60041	0.00149831	0.0130736	-2.10258
ENSMUSG00000036306	-1.35307	1.60749	-3.59798	0.00150727	0.0131439	-1.13717
ENSMUSG00000004500	-0.519305	2.97749	-3.59734	0.00150964	0.0131567	-1.66848
ENSMUSG00000068735	-0.371041	5.93236	-3.5969	0.00151126	0.013163	-2.15332
ENSMUSG00000097589	-0.67824	2.11939	-3.59659	0.00151241	0.0131652	-1.46134
ENSMUSG00000024975	-0.28635	8.69116	-3.59627	0.00151362	0.0131679	-2.16054
ENSMUSG00000061950	0.253108	5.5938	3.59541	0.00151681	0.0131878	-2.14315
ENSMUSG00000028698	-0.587843	2.1383	-3.59496	0.00151848	0.0131944	-1.39392
ENSMUSG00000034959	1.70349	-0.0277304	3.59431	0.00152088	0.0132075	-1.03272
ENSMUSG00000029472	-0.224942	7.85354	-3.59364	0.00152339	0.0132214	-2.1862
ENSMUSG00000039263	-0.345276	6.49389	-3.59263	0.00152718	0.0132464	-2.18337
ENSMUSG00000026113	0.454497	5.49016	3.59098	0.00153338	0.0132915	-2.14077
ENSMUSG00000090115	-0.521352	3.73068	-3.59076	0.00153419	0.0132915	-1.74264
ENSMUSG00000039005	2.80403	-2.37883	3.58871	0.00154193	0.0133458	-1.09256
ENSMUSG00000063894	-0.86243	5.58872	-3.58862	0.00154229	0.0133458	-2.10442
ENSMUSG00000055612	-0.51099	3.61806	-3.58744	0.00154677	0.0133767	-1.80139
ENSMUSG00000024792	0.367808	4.41095	3.585	0.00155605	0.013449	-1.97323
ENSMUSG00000045934	-1.33382	0.0343513	-3.58409	0.00155952	0.013471	-1.12668
ENSMUSG00000032719	1.61886	-1.39748	3.58373	0.0015609	0.013475	-1.07076
ENSMUSG00000097588	-0.763098	2.91861	-3.58263	0.00156511	0.0135033	-1.58913
ENSMUSG00000087060	-2.15863	-2.46339	-3.57922	0.00157828	0.0136089	-1.17363
ENSMUSG00000029095	-1.03216	1.11979	-3.57802	0.00158291	0.0136408	-1.21763
ENSMUSG00000047921	0.359232	4.98163	3.57767	0.00158428	0.0136414	-2.13598
ENSMUSG00000030801	0.353993	4.77096	3.57752	0.00158484	0.0136414	-2.07576
ENSMUSG00000026814	-0.550611	5.27464	-3.57655	0.00158865	0.0136661	-2.12844
ENSMUSG00000054932	-0.536706	3.17853	-3.57618	0.00159009	0.0136705	-1.78754
ENSMUSG00000049488	-0.772178	1.79773	-3.57494	0.00159491	0.0137038	-1.53407
ENSMUSG00000020634	0.635827	5.10394	3.57415	0.00159799	0.0137223	-2.16547
ENSMUSG00000013698	0.351438	6.2564	3.5732	0.00160175	0.0137463	-2.22748
ENSMUSG00000004110	2.39765	-1.33617	3.57296	0.00160267	0.0137463	-1.07693
ENSMUSG00000019942	-1.82239	-0.717245	-3.57036	0.00161294	0.0138263	-1.09466
ENSMUSG00000000386	-0.921321	3.00006	-3.56897	0.00161844	0.0138653	-1.65103
ENSMUSG00000091462	1.18647	0.534305	3.56807	0.001622	0.0138877	-1.32878
ENSMUSG00000049288	-1.59188	-0.776422	-3.56456	0.00163601	0.013989	-1.0996
ENSMUSG00000032363	2.4612	-2.48651	3.56442	0.00163657	0.013989	-1.13589
ENSMUSG00000000617	-0.859357	3.2257	-3.56439	0.0016367	0.013989	-1.76497
ENSMUSG00000019256	-0.844852	1.01533	-3.56293	0.00164255	0.0140303	-1.33262
ENSMUSG00000042501	0.574598	4.93538	3.56271	0.00164346	0.0140303	-2.1189
ENSMUSG00000097748	-0.707955	2.56645	-3.56213	0.00164578	0.0140419	-1.64026
ENSMUSG00000084915	-0.527834	2.88543	-3.56133	0.00164904	0.0140615	-1.68854
ENSMUSG00000067370	-0.51787	4.42225	-3.56068	0.00165163	0.0140754	-1.95325
ENSMUSG00000030677	-0.547967	2.25924	-3.55984	0.00165503	0.0140894	-1.5916
ENSMUSG00000024164	-1.8603	-1.12496	-3.5598	0.0016552	0.0140894	-1.11716
ENSMUSG00000097347	-0.665842	5.41455	-3.55848	0.00166057	0.0141269	-2.16313
ENSMUSG00000037640	-0.324096	5.18358	-3.55792	0.00166284	0.014138	-2.1779
ENSMUSG00000039579	2.12448	-0.042176	3.55748	0.00166465	0.0141452	-1.1416
ENSMUSG00000059436	0.430948	6.89019	3.55718	0.00166588	0.0141474	-2.281
ENSMUSG00000020246	-0.275572	5.03169	-3.55567	0.00167206	0.0141917	-2.14085
ENSMUSG00000062007	-0.337589	4.08788	-3.55301	0.00168297	0.014276	-2.02328
ENSMUSG00000035295	-0.949663	0.795913	-3.55159	0.00168882	0.0143173	-1.29773
ENSMUSG00000022948	-0.377099	4.66279	-3.54965	0.00169687	0.0143772	-2.06464
ENSMUSG00000034248	0.299758	6.09467	3.54832	0.00170241	0.0144158	-2.27216
ENSMUSG00000027508	-0.4081	7.65886	-3.54705	0.00170772	0.0144524	-2.29664
ENSMUSG00000059810	-0.347794	7.17009	-3.54515	0.0017157	0.0145115	-2.30205
ENSMUSG00000031370	0.357902	5.85529	3.54436	0.00171899	0.0145309	-2.2628
ENSMUSG00000072809	-1.21191	0.877619	-3.54378	0.00172144	0.0145363	-1.31308
ENSMUSG00000059498	-0.980827	-0.0474462	-3.54374	0.00172161	0.0145363	-1.21997
ENSMUSG00000039826	-0.455655	4.91962	-3.5434	0.00172303	0.0145399	-2.10821
ENSMUSG00000039577	-1.33704	-0.171959	-3.54294	0.00172498	0.0145479	-1.15823
ENSMUSG00000030246	0.536024	3.66255	3.54123	0.00173223	0.0146006	-1.92949
ENSMUSG00000034429	-0.369354	4.43845	-3.5399	0.00173785	0.0146396	-2.07263
ENSMUSG00000025877	0.743222	0.629705	3.53937	0.00174013	0.0146411	-1.51697
ENSMUSG00000023169	-0.297306	7.66932	-3.53917	0.00174097	0.0146411	-2.31508
ENSMUSG00000060450	-0.261179	5.96622	-3.53916	0.00174103	0.0146411	-2.28892
ENSMUSG00000021245	-0.604323	4.75608	-3.53861	0.00174337	0.0146523	-2.15979
ENSMUSG00000037376	-0.31768	5.67064	-3.53745	0.00174832	0.0146855	-2.25168
ENSMUSG00000030452	-0.355156	5.13719	-3.53657	0.00175212	0.0147064	-2.22697
ENSMUSG00000029587	0.267814	5.97921	3.5364	0.00175283	0.0147064	-2.30005
ENSMUSG00000029267	-0.235451	6.0875	-3.53534	0.00175739	0.0147363	-2.30236
ENSMUSG00000032952	-0.359641	5.27978	-3.53398	0.00176325	0.0147611	-2.21965
ENSMUSG00000061613	0.568867	5.17363	3.53371	0.00176441	0.0147611	-2.2506
ENSMUSG00000030655	0.687608	9.31494	3.53355	0.00176511	0.0147611	-2.27381
ENSMUSG00000050379	-0.275933	8.39352	-3.53354	0.00176513	0.0147611	-2.31782
ENSMUSG00000029436	0.892019	0.827646	3.53319	0.00176663	0.0147611	-1.37833
ENSMUSG00000057396	-0.876121	2.86935	-3.53314	0.00176688	0.0147611	-1.69224
ENSMUSG00000022151	-0.348001	4.4096	-3.53301	0.00176742	0.0147611	-2.12502
ENSMUSG00000028718	-2.25547	-1.0169	-3.53157	0.00177367	0.0148048	-1.16634
ENSMUSG00000090397	0.93426	0.501616	3.53023	0.00177948	0.0148449	-1.34487
ENSMUSG00000038692	0.884805	1.95686	3.52758	0.00179105	0.0149274	-1.62052
ENSMUSG00000017764	0.36336	3.74402	3.5275	0.00179142	0.0149274	-2.04253
ENSMUSG00000069769	0.307754	6.38912	3.52722	0.00179265	0.0149292	-2.34559
ENSMUSG00000063714	-0.932193	1.50382	-3.52638	0.00179631	0.0149512	-1.47545
ENSMUSG00000069911	1.77034	1.33261	3.52464	0.00180397	0.0150064	-1.51179
ENSMUSG00000023921	-0.30763	4.84019	-3.52427	0.00180561	0.0150096	-2.22754
ENSMUSG00000037907	0.491457	4.19152	3.52409	0.0018064	0.0150096	-2.09924
ENSMUSG00000031918	-0.357335	5.60621	-3.5236	0.00180858	0.0150191	-2.29534
ENSMUSG00000024875	-0.455105	3.6798	-3.52334	0.00180973	0.0150195	-1.96019
ENSMUSG00000056144	-0.35144	6.04843	-3.52313	0.00181068	0.0150195	-2.33982
ENSMUSG00000015112	-1.03132	1.25843	-3.5228	0.00181214	0.0150231	-1.48348
ENSMUSG00000021712	-0.547299	4.7282	-3.5215	0.00181788	0.0150621	-2.1847
ENSMUSG00000094130	-4.42316	-0.631886	-3.52059	0.00182194	0.0150872	-1.24026
ENSMUSG00000018909	-0.398351	7.03387	-3.51926	0.00182788	0.0151279	-2.36727
ENSMUSG00000032046	-0.340872	4.8401	-3.5185	0.00183126	0.0151473	-2.21979
ENSMUSG00000097526	-1.77231	-1.16107	-3.51804	0.00183334	0.0151559	-1.20537
ENSMUSG00000086290	0.388637	5.30361	3.51753	0.00183562	0.0151584	-2.28487
ENSMUSG00000020089	0.40645	4.41841	3.51749	0.00183579	0.0151584	-2.20715
ENSMUSG00000097397	-1.41171	0.115771	-3.51728	0.00183675	0.0151584	-1.25039
ENSMUSG00000092134	2.21961	-2.65442	3.51702	0.0018379	0.0151593	-1.19912
ENSMUSG00000074811	-0.502689	3.58855	-3.51644	0.00184054	0.0151725	-2.0158
ENSMUSG00000038156	0.905872	1.06179	3.51501	0.00184698	0.015217	-1.59335
ENSMUSG00000039942	-0.350548	4.9734	-3.51431	0.00185015	0.0152346	-2.25243
ENSMUSG00000042404	-0.531574	7.21898	-3.51341	0.00185421	0.0152559	-2.38254
ENSMUSG00000025010	-0.533829	3.88125	-3.51327	0.00185482	0.0152559	-1.97593
ENSMUSG00000028189	-0.610997	3.04691	-3.5123	0.00185925	0.0152836	-1.83632
ENSMUSG00000042854	-0.601991	1.93659	-3.51203	0.00186044	0.0152849	-1.64462
ENSMUSG00000020423	-0.528971	7.67989	-3.51125	0.00186402	0.0152929	-2.38444
ENSMUSG00000030651	-0.38634	3.16521	-3.51123	0.00186413	0.0152929	-2.3364
ENSMUSG00000017718	-0.744093	3.86814	-3.51113	0.00186455	0.0152929	-2.03255
ENSMUSG00000020431	-0.851148	0.412699	-3.50874	0.00187549	0.0153739	-1.36753
ENSMUSG00000097379	-0.711826	2.2292	-3.50816	0.00187814	0.015387	-1.6994
ENSMUSG00000050973	-0.400118	3.6438	-3.50783	0.00187966	0.0153909	-2.02276
ENSMUSG00000040714	-1.16613	1.21718	-3.50675	0.00188462	0.0154229	-1.41605
ENSMUSG00000097300	1.292	0.608359	3.5047	0.0018941	0.0154918	-1.38486
ENSMUSG00000094626	-2.01392	-0.957997	-3.50438	0.00189557	0.0154952	-1.24581
ENSMUSG00000031641	-0.585311	2.33089	-3.50414	0.00189668	0.0154955	-1.71059
ENSMUSG00000049775	-0.311739	10.3033	-3.50097	0.00191143	0.0156073	-2.32611
ENSMUSG00000015745	0.459433	5.64647	3.50009	0.00191555	0.0156322	-2.35151
ENSMUSG00000038400	0.48824	4.38163	3.49973	0.00191722	0.0156372	-2.22878
ENSMUSG00000024283	0.394397	7.146	3.49933	0.0019191	0.0156437	-2.41898
ENSMUSG00000074873	0.4061	4.06651	3.49786	0.00192602	0.0156884	-2.19456
ENSMUSG00000085205	3.00599	-2.2521	3.49771	0.00192673	0.0156884	-1.27803
ENSMUSG00000085211	1.1548	-0.58204	3.49654	0.00193223	0.0157245	-1.28658
ENSMUSG00000033966	-0.736095	1.95028	-3.49537	0.00193773	0.0157564	-1.55583
ENSMUSG00000053799	0.283527	5.02833	3.49525	0.00193831	0.0157564	-2.3336
ENSMUSG00000030595	0.338365	4.70317	3.49469	0.00194098	0.0157648	-2.28306
ENSMUSG00000086866	-2.20865	-1.02888	-3.49458	0.00194149	0.0157648	-1.24218
ENSMUSG00000083630	1.3852	-1.68182	3.49394	0.00194453	0.0157807	-1.26074
ENSMUSG00000033009	0.335595	5.25715	3.49262	0.00195081	0.0158229	-2.35636
ENSMUSG00000024805	0.321887	4.3965	3.49158	0.00195577	0.0158425	-2.24061
ENSMUSG00000018481	-0.229444	6.41535	-3.49156	0.00195587	0.0158425	-2.42449
ENSMUSG00000042272	-1.01597	0.0296171	-3.49143	0.00195648	0.0158425	-1.3785
ENSMUSG00000056880	1.24053	-0.846473	3.49118	0.00195767	0.0158434	-1.26947
ENSMUSG00000078490	2.51537	-0.265011	3.49095	0.00195876	0.0158434	-1.35353
ENSMUSG00000022248	-0.326957	4.78278	-3.48982	0.0019642	0.0158766	-2.26563
ENSMUSG00000020116	0.308944	4.78251	3.48964	0.00196504	0.0158766	-2.31033
ENSMUSG00000059878	-0.304017	5.64684	-3.48859	0.00197006	0.0159067	-2.37228
ENSMUSG00000051278	-0.731275	3.52031	-3.48841	0.00197094	0.0159067	-1.96858
ENSMUSG00000072572	-1.24853	-0.0736224	-3.48695	0.001978	0.0159549	-1.43807
ENSMUSG00000011751	2.82515	-3.39351	3.48645	0.00198039	0.0159549	-1.34823
ENSMUSG00000036391	0.421486	5.91927	3.48633	0.00198099	0.0159549	-2.42364
ENSMUSG00000029049	-1.04342	-0.210485	-3.48627	0.00198128	0.0159549	-1.33273
ENSMUSG00000007812	-0.301904	5.75651	-3.4854	0.00198548	0.0159783	-2.40767
ENSMUSG00000022426	0.44526	5.07093	3.48522	0.00198636	0.0159783	-2.34873
ENSMUSG00000040929	-0.481629	5.81501	-3.4844	0.00199031	0.0160013	-2.39279
ENSMUSG00000028653	-0.27677	4.18989	-3.48398	0.00199235	0.0160089	-2.20122
ENSMUSG00000044139	1.02978	0.200757	3.48359	0.00199426	0.0160154	-1.39081
ENSMUSG00000079260	-0.486583	6.55653	-3.48294	0.00199745	0.0160323	-2.44807
ENSMUSG00000028114	0.269476	5.39208	3.48233	0.00200041	0.0160471	-2.37718
ENSMUSG00000034032	-0.496379	6.07186	-3.48102	0.0020068	0.0160821	-2.40786
ENSMUSG00000085379	-0.558009	2.53893	-3.48079	0.00200794	0.0160821	-1.83026
ENSMUSG00000020948	-0.661794	4.43237	-3.48056	0.00200909	0.0160821	-2.26346
ENSMUSG00000050147	-0.698789	2.59249	-3.48054	0.00200916	0.0160821	-1.90331
ENSMUSG00000097318	-0.973852	0.361312	-3.47977	0.00201294	0.0160967	-1.44472
ENSMUSG00000084968	-1.19077	0.0959377	-3.47972	0.00201318	0.0160967	-1.33982
ENSMUSG00000026683	-1.4337	-0.549418	-3.47703	0.00202644	0.0161938	-1.29928
ENSMUSG00000082686	1.60226	-2.47186	3.4764	0.00202957	0.0162099	-1.2972
ENSMUSG00000079489	1.60204	-0.313565	3.47567	0.00203318	0.0162299	-1.35724
ENSMUSG00000096768	2.78427	6.54504	3.47378	0.00204256	0.0162959	-2.45112
ENSMUSG00000044982	-0.4878	3.12684	-3.47282	0.00204737	0.016321	-1.96802
ENSMUSG00000030180	-0.282289	7.88237	-3.47271	0.00204793	0.016321	-2.47302
ENSMUSG00000073430	-1.51951	0.297611	-3.47217	0.00205061	0.0163334	-1.32643
ENSMUSG00000022472	0.281686	5.31103	3.46818	0.00207064	0.0164839	-2.41925
ENSMUSG00000079553	-0.747668	2.97598	-3.46788	0.00207218	0.0164852	-1.86204
ENSMUSG00000030216	0.211665	6.90423	3.46771	0.00207304	0.0164852	-2.49366
ENSMUSG00000091997	1.12598	-0.0762718	3.46737	0.00207476	0.0164898	-1.405
ENSMUSG00000025766	-0.693363	3.66808	-3.46713	0.00207596	0.0164904	-2.09207
ENSMUSG00000019917	-2.14382	-1.91946	-3.46258	0.0020991	0.0166613	-1.37265
ENSMUSG00000029581	2.33193	-1.68803	3.46246	0.00209975	0.0166613	-1.30927
ENSMUSG00000018166	-0.696346	2.61323	-3.46187	0.00210276	0.0166749	-1.82886
ENSMUSG00000022387	0.235719	7.34848	3.46168	0.00210375	0.0166749	-2.50701
ENSMUSG00000026276	-0.289819	6.58834	-3.46139	0.00210519	0.0166773	-2.50223
ENSMUSG00000078765	-0.284178	6.50946	-3.46089	0.00210781	0.016689	-2.50192
ENSMUSG00000016496	0.413659	5.97698	3.45852	0.00212001	0.0167765	-2.47944
ENSMUSG00000031703	-0.278238	5.37264	-3.45801	0.00212265	0.0167883	-2.43849
ENSMUSG00000028696	-0.386457	3.63769	-3.45771	0.00212416	0.0167912	-2.09843
ENSMUSG00000020484	-0.333538	4.68103	-3.45743	0.00212563	0.0167938	-2.36152
ENSMUSG00000090028	-1.60426	1.95787	-3.45712	0.00212722	0.0167972	-1.49957
ENSMUSG00000051804	-0.773491	-0.394767	-3.4564	0.00213097	0.0168177	-1.76596
ENSMUSG00000040680	0.749549	0.514164	3.45196	0.00215413	0.0169914	-1.72379
ENSMUSG00000052253	0.297661	6.05327	3.45099	0.00215922	0.0170195	-2.5168
ENSMUSG00000059714	0.263156	5.58816	3.45084	0.00216002	0.0170195	-2.49504
ENSMUSG00000068200	3.69322	1.84419	3.44895	0.00216998	0.0170806	-1.62523
ENSMUSG00000075327	0.326435	5.27567	3.44893	0.00217012	0.0170806	-2.46446
ENSMUSG00000031146	0.567375	5.26965	3.44786	0.00217577	0.0171064	-2.46021
ENSMUSG00000075596	1.00118	0.706184	3.44778	0.00217619	0.0171064	-1.63256
ENSMUSG00000030271	-0.455073	3.36433	-3.44765	0.0021769	0.0171064	-2.06725
ENSMUSG00000025277	0.478522	3.59974	3.44553	0.00218814	0.0171855	-2.19747
ENSMUSG00000019189	-0.257549	7.92721	-3.44424	0.00219502	0.0172303	-2.54476
ENSMUSG00000034343	0.403245	4.93673	3.44302	0.00220154	0.0172722	-2.43424
ENSMUSG00000000278	0.526704	3.81143	3.44272	0.00220314	0.0172754	-1.98877
ENSMUSG00000097418	-1.79791	0.250403	-3.44237	0.00220503	0.017281	-1.39633
ENSMUSG00000028927	-0.426804	6.08808	-3.4407	0.00221404	0.0173423	-2.55042
ENSMUSG00000044847	-0.451701	4.71365	-3.43925	0.00222185	0.0173942	-2.38363
ENSMUSG00000059901	-0.682512	1.91996	-3.43887	0.00222392	0.0173961	-1.87581
ENSMUSG00000079002	-0.478903	3.77656	-3.43877	0.00222447	0.0173961	-2.23826
ENSMUSG00000024594	-0.273716	4.86578	-3.43774	0.00223005	0.0174304	-2.41314
ENSMUSG00000074570	-1.19902	0.7228	-3.43571	0.00224108	0.0175018	-1.53252
ENSMUSG00000060147	-0.441696	3.98049	-3.43543	0.00224258	0.0175018	-2.24587
ENSMUSG00000067878	-2.15951	-0.318992	-3.4354	0.00224278	0.0175018	-1.36931
ENSMUSG00000053559	1.29178	-0.381371	3.43421	0.00224924	0.0175429	-1.40862
ENSMUSG00000097369	1.44516	0.421755	3.43237	0.00225937	0.0176125	-1.47036
ENSMUSG00000030407	-0.461469	3.75191	-3.43213	0.00226066	0.0176131	-2.17795
ENSMUSG00000021067	0.30698	5.36383	3.42979	0.0022736	0.0177045	-2.49
ENSMUSG00000042678	1.94328	-2.15106	3.42948	0.0022753	0.0177083	-1.37835
ENSMUSG00000062866	-1.32202	2.26267	-3.42908	0.00227749	0.0177083	-1.66749
ENSMUSG00000098753	-1.9382	-0.242454	-3.42904	0.00227772	0.0177083	-1.44099
ENSMUSG00000009079	-0.236383	8.72171	-3.42694	0.0022894	0.0177897	-2.56743
ENSMUSG00000085929	-1.75775	-0.728048	-3.4246	0.00230247	0.0178817	-1.39581
ENSMUSG00000038236	0.848756	-0.606405	3.42368	0.00230763	0.0179123	-1.73925
ENSMUSG00000097343	-1.13522	1.00505	-3.42184	0.00231795	0.0179775	-1.61147
ENSMUSG00000021022	-0.30088	4.31669	-3.42175	0.00231849	0.0179775	-2.35592
ENSMUSG00000044122	1.51816	-1.04367	3.4212	0.00232159	0.017992	-1.41785
ENSMUSG00000078813	0.387791	4.13868	3.42029	0.00232671	0.0180197	-2.37111
ENSMUSG00000055053	-0.28211	5.80811	-3.42005	0.00232806	0.0180197	-2.53156
ENSMUSG00000043456	-2.03112	-0.204391	-3.41991	0.00232886	0.0180197	-1.4021
ENSMUSG00000020048	0.330766	8.26768	3.41957	0.0023308	0.0180231	-2.58882
ENSMUSG00000018001	0.288296	6.48725	3.4194	0.00233176	0.0180231	-2.59318
ENSMUSG00000089994	1.78525	-1.33904	3.419	0.00233402	0.0180311	-1.45922
ENSMUSG00000055200	-0.453459	3.51637	-3.41827	0.00233818	0.0180536	-2.20305
ENSMUSG00000058360	-0.504172	7.34645	-3.41759	0.00234205	0.0180703	-2.6096
ENSMUSG00000027011	-0.479118	3.40647	-3.41745	0.00234281	0.0180703	-2.1295
ENSMUSG00000024673	1.15268	1.92542	3.41641	0.00234879	0.0181068	-1.8035
ENSMUSG00000025873	-0.281732	6.08864	-3.416	0.00235111	0.0181152	-2.58763
ENSMUSG00000005107	-0.338339	4.65654	-3.4109	0.00238045	0.0183316	-2.38095
ENSMUSG00000074874	-1.33742	-0.991063	-3.41062	0.00238204	0.0183342	-1.45027
ENSMUSG00000034729	-0.304301	4.76007	-3.4097	0.00238735	0.0183654	-2.40788
ENSMUSG00000046671	-0.298447	6.20231	-3.40744	0.00240052	0.018457	-2.60816
ENSMUSG00000094030	0.797441	4.33096	3.40704	0.00240287	0.0184621	-2.41247
ENSMUSG00000081809	-1.58129	-0.739233	-3.40689	0.00240372	0.0184621	-1.42825
ENSMUSG00000028792	0.321005	5.94338	3.40564	0.00241102	0.0185086	-2.60962
ENSMUSG00000058446	-0.2699	8.4623	-3.40457	0.00241732	0.0185472	-2.62269
ENSMUSG00000097346	0.875279	6.92651	3.404	0.00242066	0.018563	-2.4619
ENSMUSG00000017493	0.592065	8.1661	3.40342	0.00242406	0.0185794	-2.62139
ENSMUSG00000020238	-0.305785	7.5314	-3.40318	0.00242549	0.0185806	-2.64485
ENSMUSG00000055067	0.284721	4.63576	3.40251	0.00242942	0.018595	-2.47811
ENSMUSG00000019864	-0.487306	3.52413	-3.40224	0.00243101	0.018595	-2.23448
ENSMUSG00000089975	-1.76081	-1.65276	-3.40221	0.00243118	0.018595	-1.46009
ENSMUSG00000044724	2.44333	-2.42178	3.40166	0.00243446	0.0186093	-1.48157
ENSMUSG00000050592	-0.282049	9.03169	-3.40147	0.00243559	0.0186093	-2.60631
ENSMUSG00000032561	0.427894	6.30006	3.40086	0.00243921	0.0186272	-2.59363
ENSMUSG00000097635	-2.70297	-2.38271	-3.40004	0.00244406	0.0186545	-1.48656
ENSMUSG00000035578	1.14465	0.285359	3.39918	0.00244917	0.0186837	-1.50209
ENSMUSG00000067038	1.52184	4.88118	3.39812	0.00245547	0.018722	-2.49871
ENSMUSG00000051339	-0.90305	1.20318	-3.39784	0.00245715	0.018725	-1.93407
ENSMUSG00000091472	-1.80734	-1.58689	-3.39609	0.00246762	0.0187917	-1.48199
ENSMUSG00000027822	-0.356968	4.35851	-3.39595	0.00246847	0.0187917	-2.43179
ENSMUSG00000066800	-0.381058	6.81582	-3.39543	0.00247155	0.0188054	-2.6589
ENSMUSG00000036959	0.368965	4.37603	3.39477	0.00247551	0.0188257	-2.49923
ENSMUSG00000054619	0.77095	1.65439	3.39363	0.0024824	0.0188683	-1.96601
ENSMUSG00000021259	2.43424	-2.3297	3.39333	0.00248418	0.0188715	-1.54975
ENSMUSG00000087180	2.31124	-2.32923	3.39313	0.00248541	0.0188715	-1.46723
ENSMUSG00000044145	-0.722603	0.780652	-3.39146	0.00249551	0.0189384	-1.64803
ENSMUSG00000086652	-0.501072	3.609	-3.39048	0.00250142	0.0189654	-2.21183
ENSMUSG00000024079	-0.412811	4.45683	-3.39044	0.00250166	0.0189654	-2.57404
ENSMUSG00000040663	-0.357365	8.36784	-3.38811	0.00251586	0.0190534	-2.67503
ENSMUSG00000038280	-0.274593	5.87315	-3.38803	0.00251636	0.0190534	-2.63768
ENSMUSG00000074355	0.364999	2.59921	3.38789	0.00251717	0.0190534	-2.11208
ENSMUSG00000037461	-0.253946	5.66721	-3.38744	0.00251992	0.0190643	-2.65312
ENSMUSG00000032698	1.81151	0.147894	3.38717	0.0025216	0.0190672	-1.52282
ENSMUSG00000074052	-1.32794	0.0897871	-3.38547	0.00253201	0.0191308	-1.55548
ENSMUSG00000067702	-0.706339	0.894091	-3.38537	0.00253264	0.0191308	-1.74288
ENSMUSG00000036019	-1.153	-0.496574	-3.38438	0.00253872	0.0191669	-1.54248
ENSMUSG00000005312	0.3787	6.73969	3.38409	0.00254054	0.0191707	-2.69158
ENSMUSG00000020401	-0.456571	2.81172	-3.3836	0.00254351	0.0191833	-2.34812
ENSMUSG00000039814	-2.16225	-1.28465	-3.38215	0.00255251	0.0192412	-1.52411
ENSMUSG00000034593	0.606606	4.55752	3.38178	0.00255481	0.0192486	-2.50475
ENSMUSG00000091264	0.34705	4.04317	3.38121	0.00255832	0.0192651	-2.42159
ENSMUSG00000032641	-0.535637	2.39227	-3.38037	0.00256353	0.0192944	-1.95771
ENSMUSG00000001323	-0.505016	4.00502	-3.37895	0.00257239	0.0193512	-2.34096
ENSMUSG00000031790	-0.809738	2.21654	-3.37843	0.0025756	0.0193653	-1.90485
ENSMUSG00000085242	-2.20152	-1.20731	-3.37795	0.00257859	0.0193779	-1.48736
ENSMUSG00000067931	0.709474	1.67745	3.3776	0.0025808	0.0193845	-2.02024
ENSMUSG00000042423	0.293441	7.24703	3.37613	0.00259003	0.0194438	-2.71036
ENSMUSG00000074480	0.579858	3.59923	3.37526	0.00259548	0.0194747	-2.39782
ENSMUSG00000097321	-1.01825	1.0461	-3.3744	0.0026009	0.0195054	-1.72411
ENSMUSG00000030083	-0.545086	4.94416	-3.37154	0.002619	0.0196311	-2.56305
ENSMUSG00000020962	-0.335176	5.58921	-3.3713	0.00262054	0.0196326	-2.65222
ENSMUSG00000045822	-0.628546	2.94737	-3.37055	0.00262528	0.019658	-2.16072
ENSMUSG00000026228	1.90061	-2.41098	3.36971	0.00263067	0.0196883	-1.50971
ENSMUSG00000073471	0.483317	2.40281	3.36666	0.00265017	0.0198241	-2.24531
ENSMUSG00000003153	0.257783	6.43002	3.36551	0.00265754	0.0198646	-2.72854
ENSMUSG00000034663	0.32927	4.51859	3.36539	0.00265831	0.0198646	-2.57769
ENSMUSG00000030986	0.334419	4.35568	3.36435	0.00266502	0.0199046	-2.5398
ENSMUSG00000070461	0.621564	2.41469	3.36378	0.00266874	0.01991	-2.11446
ENSMUSG00000037336	0.843005	1.20158	3.36369	0.00266928	0.01991	-1.85313
ENSMUSG00000044678	1.23961	1.68994	3.36361	0.00266982	0.01991	-1.8682
ENSMUSG00000022742	0.29719	4.78817	3.36326	0.00267209	0.0199168	-2.58401
ENSMUSG00000003623	-0.214746	5.68507	-3.36275	0.00267536	0.0199309	-2.6982
ENSMUSG00000021222	-0.40877	4.63423	-3.36198	0.00268034	0.0199556	-2.50971
ENSMUSG00000056185	-0.469424	3.04689	-3.36182	0.0026814	0.0199556	-2.146
ENSMUSG00000038605	-0.373156	4.23336	-3.36037	0.00269084	0.0200157	-2.44094
ENSMUSG00000027281	-0.429018	3.73644	-3.35772	0.00270815	0.0201342	-2.43506
ENSMUSG00000079709	-1.19972	2.99956	-3.35697	0.00271307	0.0201605	-1.91972
ENSMUSG00000062545	-0.433619	5.12465	-3.3548	0.00272741	0.0202433	-2.66581
ENSMUSG00000033233	-0.700229	1.37803	-3.35466	0.00272828	0.0202433	-1.83356
ENSMUSG00000079614	-0.324272	5.81458	-3.35465	0.00272836	0.0202433	-2.72256
ENSMUSG00000051147	-0.474582	3.56889	-3.35417	0.00273155	0.0202521	-2.35621
ENSMUSG00000036398	0.396684	4.83574	3.35405	0.00273231	0.0202521	-2.60894
ENSMUSG00000026275	-0.250634	5.95288	-3.35297	0.00273948	0.0202758	-2.72554
ENSMUSG00000018677	-0.393869	4.33695	-3.35286	0.00274025	0.0202758	-2.54245
ENSMUSG00000046456	-2.16152	-2.08562	-3.35276	0.00274089	0.0202758	-1.59424
ENSMUSG00000030921	-0.221927	7.14618	-3.35247	0.00274278	0.0202758	-2.76415
ENSMUSG00000020986	-0.260254	4.67475	-3.35237	0.00274344	0.0202758	-2.60374
ENSMUSG00000035835	-0.64747	3.77445	-3.35232	0.00274383	0.0202758	-2.35713
ENSMUSG00000048581	-0.894487	1.831	-3.35179	0.0027473	0.0202912	-1.93251
ENSMUSG00000037306	0.535936	3.89731	3.35096	0.00275283	0.0203217	-2.21857
ENSMUSG00000031479	-0.223921	5.71392	-3.35018	0.00275805	0.02035	-2.72634
ENSMUSG00000039117	0.25045	6.04576	3.3494	0.00276326	0.0203782	-2.74237
ENSMUSG00000019373	-0.245149	5.54165	-3.348	0.00277263	0.0204369	-2.70206
ENSMUSG00000022668	-0.356957	4.5508	-3.34774	0.00277441	0.0204398	-2.57502
ENSMUSG00000041936	-0.823131	4.41471	-3.34712	0.00277858	0.0204602	-2.32193
ENSMUSG00000094796	-0.573204	3.24741	-3.34637	0.00278358	0.0204786	-2.29008
ENSMUSG00000004768	0.44869	3.69946	3.34633	0.00278388	0.0204786	-2.41544
ENSMUSG00000015452	0.618432	2.948	3.3448	0.00279416	0.0205439	-2.28375
ENSMUSG00000032202	0.325396	5.75444	3.34445	0.00279658	0.0205513	-2.76724
ENSMUSG00000037085	-0.667827	2.80297	-3.34399	0.00279965	0.0205636	-2.21085
ENSMUSG00000035299	0.734784	5.64037	3.34106	0.00281961	0.0206998	-2.74825
ENSMUSG00000063049	0.438348	3.77522	3.34026	0.00282505	0.0207293	-2.49133
ENSMUSG00000040327	0.543302	5.20119	3.33896	0.00283393	0.0207738	-2.70235
ENSMUSG00000020135	1.79433	-0.483861	3.33896	0.00283395	0.0207738	-1.63215
ENSMUSG00000022682	0.245241	6.05352	3.33867	0.0028359	0.0207777	-2.77958
ENSMUSG00000061132	1.36817	1.07469	3.3382	0.00283917	0.0207912	-1.79659
ENSMUSG00000066880	-0.400609	5.11817	-3.33737	0.00284489	0.0208149	-2.6584
ENSMUSG00000027834	0.453615	4.61683	3.33712	0.00284659	0.0208149	-2.62552
[truncated: 806 more rows]

## Sheet: PBL_Age18vs3_NZO
Gene.Ensembl	logFC	AveExpr	t	P.Value	adj.P.Val	B
ENSMUSG00000044786	2.02955	9.02891	19.2394	2.92726e-15	4.64e-11	24.5352
ENSMUSG00000053560	1.66479	6.73849	18.0479	1.1039e-14	8.74893e-11	23.5858
ENSMUSG00000040435	1.9851	5.87881	16.0183	1.27736e-13	6.74915e-10	21.2407
ENSMUSG00000020863	-1.38496	7.09871	-15.6378	2.08185e-13	8.24984e-10	20.7662
ENSMUSG00000052684	2.70168	5.25884	15.2823	3.31565e-13	1.05113e-09	20.2677
ENSMUSG00000052837	2.4574	8.39709	14.8178	6.17605e-13	1.63161e-09	19.6601
ENSMUSG00000097375	-2.90694	1.17	-13.846	2.39389e-12	5.42079e-09	16.4235
ENSMUSG00000004865	-1.46597	7.20274	-13.1654	6.47711e-12	1.20113e-08	17.4314
ENSMUSG00000072915	-1.51846	3.26561	-13.0813	7.34513e-12	1.20113e-08	17.2159
ENSMUSG00000089788	-1.42897	5.61322	-13.0605	7.57763e-12	1.20113e-08	17.2849
ENSMUSG00000028248	-1.11236	7.61566	-12.9468	8.99331e-12	1.29594e-08	17.104
ENSMUSG00000040459	-0.891209	5.89051	-12.6802	1.34997e-11	1.7832e-08	16.7156
ENSMUSG00000067928	-1.35606	3.64096	-12.4256	2.0023e-11	2.44142e-08	16.3024
ENSMUSG00000092274	-1.26262	9.36903	-12.3409	2.28583e-11	2.58805e-08	16.1304
ENSMUSG00000091575	-1.32775	4.78142	-12.2959	2.45353e-11	2.59273e-08	16.1248
ENSMUSG00000042063	-0.929518	4.51841	-12.0023	3.9095e-11	3.8731e-08	15.6641
ENSMUSG00000057894	-1.13638	5.11028	-11.8767	4.7848e-11	4.01858e-08	15.4649
ENSMUSG00000047945	1.20721	5.25441	11.8755	4.79397e-11	4.01858e-08	15.4627
ENSMUSG00000027677	-1.22683	6.64327	-11.8725	4.81692e-11	4.01858e-08	15.4584
ENSMUSG00000078899	-0.965483	5.84355	-11.7574	5.80444e-11	4.60031e-08	15.2701
ENSMUSG00000020994	-1.21665	6.85748	-11.5425	8.2525e-11	6.22907e-08	14.9253
ENSMUSG00000041459	-1.24501	7.63958	-11.1901	1.48501e-10	1.06995e-07	14.349
ENSMUSG00000036916	-0.90483	4.56035	-11.141	1.61314e-10	1.11173e-07	14.2667
ENSMUSG00000051451	-0.974619	6.042	-10.9889	2.08893e-10	1.37965e-07	13.9961
ENSMUSG00000003484	1.15139	7.23534	10.8734	2.54657e-10	1.61463e-07	13.8086
ENSMUSG00000095123	-1.28904	3.9347	-10.8497	2.65252e-10	1.61712e-07	13.7786
ENSMUSG00000018379	-1.06878	7.53889	-10.7326	3.24811e-10	1.86631e-07	13.573
ENSMUSG00000028034	-1.26912	6.35351	-10.724	3.29674e-10	1.86631e-07	13.5444
ENSMUSG00000027981	-1.1078	4.33671	-10.4625	5.21289e-10	2.8493e-07	13.1053
ENSMUSG00000085887	-1.03993	5.11366	-10.3426	6.44748e-10	3.40664e-07	12.8713
ENSMUSG00000097194	-1.91871	3.76831	-10.3218	6.69083e-10	3.42117e-07	12.8691
ENSMUSG00000021263	-1.57114	4.16251	-10.2624	7.44009e-10	3.6854e-07	12.7645
ENSMUSG00000029328	-1.03612	7.54767	-10.1045	9.88584e-10	4.7485e-07	12.4651
ENSMUSG00000021250	3.44406	7.72139	10.0531	1.08489e-09	5.0578e-07	12.3809
ENSMUSG00000020385	-0.764676	6.37065	-9.93476	1.34601e-09	6.09588e-07	12.1341
ENSMUSG00000047909	-0.801156	5.80973	-9.87649	1.49767e-09	6.59286e-07	12.0246
ENSMUSG00000046785	-1.07805	5.58309	-9.8617	1.53893e-09	6.59286e-07	11.9994
ENSMUSG00000033543	-0.65471	4.74763	-9.78871	1.76039e-09	7.15769e-07	11.8845
ENSMUSG00000081512	-1.33303	2.26228	-9.78849	1.76109e-09	7.15769e-07	11.8978
ENSMUSG00000072612	3.86492	1.52956	9.75384	1.87761e-09	7.26475e-07	10.4871
ENSMUSG00000036192	-2.52024	9.72369	-9.75341	1.87909e-09	7.26475e-07	11.8512
ENSMUSG00000029823	-0.956219	7.93162	-9.73223	1.95428e-09	7.37556e-07	11.797
ENSMUSG00000087497	-1.33408	2.2407	-9.66789	2.20234e-09	8.11845e-07	11.5833
ENSMUSG00000037266	-1.0068	9.24106	-9.64489	2.29873e-09	8.28119e-07	11.6565
ENSMUSG00000096802	1.67062	2.32441	9.6025	2.48802e-09	8.7639e-07	11.5094
ENSMUSG00000021327	-0.671945	5.92163	-9.50309	2.99799e-09	1.03307e-06	11.3281
ENSMUSG00000020069	-0.800074	5.30645	-9.45811	3.26317e-09	1.10052e-06	11.25
ENSMUSG00000031134	-0.801366	5.63333	-9.42529	3.47189e-09	1.14491e-06	11.1818
ENSMUSG00000032515	1.10465	5.6291	9.40739	3.59152e-09	1.14491e-06	11.1623
ENSMUSG00000089726	-1.7332	3.49221	-9.40446	3.61147e-09	1.14491e-06	11.2152
ENSMUSG00000019982	-1.51191	3.33671	-9.37901	3.79001e-09	1.17795e-06	11.1663
ENSMUSG00000054364	1.23865	6.76107	9.28474	4.53468e-09	1.3593e-06	10.9337
ENSMUSG00000017421	-0.741303	7.36419	-9.28355	4.54501e-09	1.3593e-06	10.9417
ENSMUSG00000027881	-1.00001	7.37481	-9.21997	5.13292e-09	1.5067e-06	10.8165
ENSMUSG00000041375	-0.692695	5.85662	-9.16392	5.7163e-09	1.64744e-06	10.68
ENSMUSG00000011256	0.6925	7.33928	9.11924	6.23029e-09	1.76351e-06	10.6218
ENSMUSG00000089989	-0.967809	5.68725	-9.08927	6.60163e-09	1.83583e-06	10.5379
ENSMUSG00000021796	1.87788	2.61669	9.03563	7.32454e-09	2.00175e-06	10.463
ENSMUSG00000097042	-0.802767	4.02055	-9.02621	7.45973e-09	2.00414e-06	10.4781
ENSMUSG00000090086	-0.754756	5.68673	-9.00135	7.82894e-09	2.06828e-06	10.3645
ENSMUSG00000098702	-1.48824	1.64009	-8.94257	8.77917e-09	2.28129e-06	10.0981
ENSMUSG00000079144	-1.09026	4.09694	-8.9237	9.10891e-09	2.3288e-06	10.2801
ENSMUSG00000085622	-1.3155	3.32252	-8.89309	9.67123e-09	2.42888e-06	10.2515
ENSMUSG00000012076	-0.785957	3.79811	-8.88598	9.80683e-09	2.42888e-06	10.2207
ENSMUSG00000022789	-0.611075	5.89837	-8.80918	1.14043e-08	2.78107e-06	9.98542
ENSMUSG00000021431	-0.779794	4.26101	-8.76432	1.24595e-08	2.94884e-06	9.96245
ENSMUSG00000021704	-1.16402	4.11878	-8.76413	1.24643e-08	2.94884e-06	9.96725
ENSMUSG00000027522	-0.564843	6.63072	-8.72504	1.34662e-08	3.09852e-06	9.82763
ENSMUSG00000066442	0.753168	3.27949	8.72423	1.3488e-08	3.09852e-06	9.92612
ENSMUSG00000078503	-1.69493	2.20584	-8.71007	1.38718e-08	3.13964e-06	9.828
ENSMUSG00000027215	0.555114	7.02942	8.70316	1.40631e-08	3.13964e-06	9.79688
ENSMUSG00000053113	1.66539	6.90533	8.60525	1.70886e-08	3.7621e-06	9.60719
ENSMUSG00000051550	-1.00913	3.69823	-8.53773	1.95603e-08	4.24726e-06	9.54104
ENSMUSG00000021500	-0.76162	7.2699	-8.52818	1.99386e-08	4.27089e-06	9.45244
ENSMUSG00000060989	-1.48727	3.81876	-8.49995	2.11018e-08	4.45981e-06	9.41661
ENSMUSG00000048960	-2.54073	0.117645	-8.48694	2.1661e-08	4.51774e-06	8.46701
ENSMUSG00000074056	-3.4748	-0.304691	-8.47025	2.24011e-08	4.61143e-06	7.92641
ENSMUSG00000000326	-2.0925	7.84741	-8.4578	2.29705e-08	4.64903e-06	9.34777
ENSMUSG00000035597	-0.936082	6.19637	-8.44608	2.35197e-08	4.64903e-06	9.26163
ENSMUSG00000045231	-1.45452	2.39536	-8.44061	2.37805e-08	4.64903e-06	9.33866
ENSMUSG00000024190	2.3124	7.96895	8.43515	2.40443e-08	4.64903e-06	9.2913
ENSMUSG00000037965	-0.71183	7.05317	-8.43395	2.41026e-08	4.64903e-06	9.25976
ENSMUSG00000086429	-1.1789	2.68675	-8.42482	2.45511e-08	4.64903e-06	9.33624
ENSMUSG00000063511	-0.825743	7.3391	-8.41631	2.49772e-08	4.64903e-06	9.23235
ENSMUSG00000035047	-0.583702	6.01868	-8.40534	2.55371e-08	4.64903e-06	9.17482
ENSMUSG00000071076	1.15129	7.70421	8.40517	2.5546e-08	4.64903e-06	9.21186
ENSMUSG00000067736	-0.963781	6.29805	-8.39555	2.60481e-08	4.64903e-06	9.1604
ENSMUSG00000065947	-0.963781	6.29805	-8.39555	2.60481e-08	4.64903e-06	9.1604
ENSMUSG00000053467	-1.07826	1.93465	-8.3945	2.61033e-08	4.64903e-06	9.19002
ENSMUSG00000035545	-0.908126	8.26502	-8.3805	2.68544e-08	4.72965e-06	9.19792
ENSMUSG00000028645	0.866138	5.51196	8.36293	2.78277e-08	4.84722e-06	9.1025
ENSMUSG00000086859	-0.856625	3.47198	-8.35029	2.85509e-08	4.91914e-06	9.18156
ENSMUSG00000003545	2.99789	4.2327	8.33549	2.94218e-08	4.98613e-06	9.16847
ENSMUSG00000028180	-0.751301	5.51854	-8.33304	2.95689e-08	4.98613e-06	9.02903
ENSMUSG00000025867	-1.38508	4.77997	-8.31761	3.05111e-08	5.09086e-06	9.01052
ENSMUSG00000027804	-0.831366	5.17104	-8.29958	3.16518e-08	5.22617e-06	8.97389
ENSMUSG00000035770	-0.483027	5.9679	-8.29409	3.20081e-08	5.23051e-06	8.94673
ENSMUSG00000007850	-1.02654	8.44206	-8.27709	3.31368e-08	5.35971e-06	8.99258
ENSMUSG00000009350	2.99015	-0.758355	8.24658	3.52665e-08	5.64655e-06	7.45042
ENSMUSG00000078889	-1.39979	2.93885	-8.24015	3.57334e-08	5.6641e-06	8.97945
ENSMUSG00000037818	-0.7905	3.29581	-8.23336	3.62331e-08	5.67391e-06	8.95981
ENSMUSG00000022217	-1.05799	2.48652	-8.22551	3.68194e-08	5.67391e-06	8.94632
ENSMUSG00000062014	-0.897565	6.67806	-8.22485	3.68692e-08	5.67391e-06	8.82167
ENSMUSG00000043953	1.83506	2.94435	8.21022	3.79905e-08	5.79026e-06	8.91329
ENSMUSG00000023009	-0.826548	4.13892	-8.18883	3.96932e-08	5.99216e-06	8.81072
ENSMUSG00000073485	-1.37234	1.1165	-8.17528	4.08131e-08	6.1031e-06	8.58393
ENSMUSG00000004896	-0.702059	5.13294	-8.1551	4.25407e-08	6.21294e-06	8.68422
ENSMUSG00000097154	-0.994405	2.36411	-8.15439	4.26027e-08	6.21294e-06	8.79121
ENSMUSG00000073455	-0.664095	4.27606	-8.15301	4.27235e-08	6.21294e-06	8.67278
ENSMUSG00000056708	0.895872	7.82942	8.1419	4.37112e-08	6.29878e-06	8.68614
ENSMUSG00000047694	-0.646558	4.94634	-8.13463	4.437e-08	6.33611e-06	8.6385
ENSMUSG00000031200	-1.01793	3.23546	-8.12496	4.52624e-08	6.37857e-06	8.73741
ENSMUSG00000071337	-0.807217	6.21546	-8.12272	4.54721e-08	6.37857e-06	8.59858
ENSMUSG00000072640	-0.82958	4.10484	-8.10388	4.72729e-08	6.5394e-06	8.63742
ENSMUSG00000090015	-1.06969	3.39039	-8.10213	4.74437e-08	6.5394e-06	8.69893
ENSMUSG00000030337	-0.840889	6.14562	-8.09233	4.84137e-08	6.60641e-06	8.53328
ENSMUSG00000086320	-1.68142	6.20032	-8.08884	4.87634e-08	6.60641e-06	8.53885
ENSMUSG00000019710	-0.556909	5.86336	-8.07206	5.04837e-08	6.7815e-06	8.48903
ENSMUSG00000011158	-0.563931	5.73331	-8.05454	5.23462e-08	6.97261e-06	8.45302
ENSMUSG00000026754	-0.593945	4.66091	-8.04584	5.3298e-08	7.02975e-06	8.47002
ENSMUSG00000039233	-0.496377	5.02996	-8.04255	5.36622e-08	7.02975e-06	8.44628
ENSMUSG00000020926	-1.99255	-0.387371	-8.00573	5.79185e-08	7.52513e-06	7.95315
ENSMUSG00000031239	-1.22951	3.00091	-7.96771	6.2681e-08	8.07769e-06	8.42912
ENSMUSG00000027669	-0.975801	2.73796	-7.9556	6.42825e-08	8.21727e-06	8.39066
ENSMUSG00000062822	-0.425209	5.98814	-7.93871	6.65845e-08	8.44345e-06	8.20892
ENSMUSG00000087153	-0.630758	5.13027	-7.92381	6.86867e-08	8.6409e-06	8.19493
ENSMUSG00000058571	-1.84061	1.21108	-7.90431	7.15415e-08	8.88513e-06	8.07826
ENSMUSG00000046351	-0.757631	4.32691	-7.89976	7.22251e-08	8.88513e-06	8.20256
ENSMUSG00000031146	0.746416	6.57975	7.8992	7.23097e-08	8.88513e-06	8.13945
ENSMUSG00000090626	-1.1076	3.53262	-7.87827	7.55446e-08	9.21121e-06	8.21636
ENSMUSG00000020868	-0.654444	4.23447	-7.86871	7.70724e-08	9.2818e-06	8.13833
ENSMUSG00000090509	-2.27469	-0.559607	-7.86522	7.76381e-08	9.2818e-06	7.04823
ENSMUSG00000097061	-0.763993	2.83097	-7.85712	7.89655e-08	9.2818e-06	8.20471
ENSMUSG00000097125	4.35826	1.21673	7.85686	7.90096e-08	9.2818e-06	7.24132
ENSMUSG00000030413	1.19369	5.9464	7.85661	7.90513e-08	9.2818e-06	8.04663
ENSMUSG00000031167	-0.733696	7.76816	-7.83886	8.20479e-08	9.51145e-06	8.0603
ENSMUSG00000061510	-2.05272	0.305989	-7.83794	8.22074e-08	9.51145e-06	7.43679
ENSMUSG00000027368	1.1749	5.34426	7.82763	8.40058e-08	9.6491e-06	8.01534
ENSMUSG00000055897	-0.587597	4.76819	-7.81849	8.56346e-08	9.76543e-06	7.99619
ENSMUSG00000020263	-0.607785	5.1021	-7.80769	8.75995e-08	9.91814e-06	7.94668
ENSMUSG00000024121	0.701395	6.41261	7.80217	8.86225e-08	9.9628e-06	7.92616
ENSMUSG00000024677	-1.00394	7.96758	-7.7599	9.68745e-08	1.07406e-05	7.908
ENSMUSG00000030365	-0.93476	7.50734	-7.75979	9.68961e-08	1.07406e-05	7.90866
ENSMUSG00000029298	-0.847287	6.42311	-7.75621	9.76294e-08	1.07467e-05	7.83296
ENSMUSG00000055322	1.68604	3.98254	7.75203	9.84941e-08	1.07671e-05	7.91556
ENSMUSG00000095403	-1.11679	6.31159	-7.74271	1.00452e-07	1.09059e-05	7.80676
ENSMUSG00000059005	-0.841361	8.8991	-7.73838	1.01373e-07	1.09311e-05	7.89284
ENSMUSG00000047986	-1.53704	3.00031	-7.7344	1.0223e-07	1.09313e-05	7.95767
ENSMUSG00000061410	1.98312	0.49761	7.73198	1.02755e-07	1.09313e-05	7.5539
ENSMUSG00000028782	-1.42854	0.45337	-7.72807	1.03606e-07	1.09484e-05	7.8773
ENSMUSG00000021134	-0.887519	8.89987	-7.70481	1.08829e-07	1.13342e-05	7.82818
ENSMUSG00000070385	-2.26109	0.667382	-7.70261	1.09338e-07	1.13342e-05	7.55698
ENSMUSG00000010608	-0.880109	8.07905	-7.70233	1.09402e-07	1.13342e-05	7.78514
ENSMUSG00000040323	1.01429	4.27656	7.65194	1.21735e-07	1.25215e-05	7.68863
ENSMUSG00000043964	0.540114	5.16693	7.64922	1.22442e-07	1.25215e-05	7.61861
ENSMUSG00000042202	-0.874504	5.07925	-7.64397	1.23813e-07	1.25805e-05	7.61245
ENSMUSG00000050714	-0.949174	3.43866	-7.63172	1.2708e-07	1.28072e-05	7.71202
ENSMUSG00000046006	0.763695	4.52306	7.62958	1.2766e-07	1.28072e-05	7.60992
ENSMUSG00000009079	-0.682388	7.86811	-7.5754	1.43274e-07	1.42833e-05	7.50229
ENSMUSG00000036572	-0.852224	5.09861	-7.54628	1.52465e-07	1.51045e-05	7.3983
ENSMUSG00000085385	-1.14838	4.15111	-7.54189	1.53905e-07	1.51294e-05	7.46694
ENSMUSG00000030157	-0.925074	6.32192	-7.53776	1.55269e-07	1.51294e-05	7.36458
ENSMUSG00000016495	-0.590282	5.76568	-7.53682	1.5558e-07	1.51294e-05	7.35522
ENSMUSG00000021974	-2.11909	0.807365	-7.51733	1.62207e-07	1.56777e-05	7.15463
ENSMUSG00000037049	0.468625	4.82897	7.51399	1.63372e-07	1.56946e-05	7.35326
ENSMUSG00000034160	-0.729111	8.83482	-7.46453	1.81658e-07	1.73461e-05	7.31467
ENSMUSG00000024276	-0.874249	5.61065	-7.46087	1.83093e-07	1.73784e-05	7.19504
ENSMUSG00000021147	-0.617233	6.20008	-7.45131	1.86895e-07	1.76338e-05	7.18128
ENSMUSG00000031370	-0.552943	4.85541	-7.44325	1.9016e-07	1.78356e-05	7.18856
ENSMUSG00000002058	0.674598	5.53228	7.41714	2.01157e-07	1.87561e-05	7.1058
ENSMUSG00000032621	-0.627077	5.43187	-7.40522	2.06394e-07	1.91319e-05	7.07648
ENSMUSG00000091509	-1.19809	2.46461	-7.3947	2.11129e-07	1.9457e-05	7.25752
ENSMUSG00000027122	-0.608534	4.26935	-7.39068	2.1297e-07	1.95133e-05	7.10832
ENSMUSG00000034163	-0.571395	6.62939	-7.3821	2.16952e-07	1.97638e-05	7.03854
ENSMUSG00000025357	-1.14211	8.23862	-7.36129	2.26929e-07	2.05546e-05	7.05964
ENSMUSG00000078765	-0.687157	4.98647	-7.35705	2.29018e-07	2.06259e-05	7.0098
ENSMUSG00000022651	1.8735	7.07995	7.33575	2.39821e-07	2.14768e-05	6.952
ENSMUSG00000039307	-0.465329	7.07185	-7.32338	2.46337e-07	2.19365e-05	6.92647
ENSMUSG00000031539	-0.541959	4.91212	-7.31532	2.50676e-07	2.21982e-05	6.9042
ENSMUSG00000048701	-0.473269	5.67482	-7.31187	2.52557e-07	2.22405e-05	6.86917
ENSMUSG00000032295	-0.545494	5.81432	-7.3009	2.58642e-07	2.26505e-05	6.84294
ENSMUSG00000029687	-0.54928	4.17848	-7.29684	2.60933e-07	2.26581e-05	6.9348
ENSMUSG00000039831	-1.73999	1.32437	-7.29568	2.61588e-07	2.26581e-05	6.97725
ENSMUSG00000028676	-0.792992	6.84709	-7.28898	2.65424e-07	2.28654e-05	6.83824
ENSMUSG00000020894	-0.596188	6.51461	-7.27798	2.71839e-07	2.32914e-05	6.8032
ENSMUSG00000026333	-0.786292	2.75751	-7.26995	2.76629e-07	2.35745e-05	6.98743
ENSMUSG00000025034	0.560904	6.24865	7.26191	2.81509e-07	2.38621e-05	6.75966
ENSMUSG00000038486	-1.46275	1.58804	-7.25832	2.83715e-07	2.38782e-05	6.95874
ENSMUSG00000029701	-0.612504	5.50514	-7.25671	2.84713e-07	2.38782e-05	6.75122
ENSMUSG00000053332	-0.583761	6.69343	-7.24705	2.90757e-07	2.42568e-05	6.74261
ENSMUSG00000022711	-0.436883	5.10751	-7.20624	3.1781e-07	2.63749e-05	6.65295
ENSMUSG00000002844	0.461575	5.69106	7.20315	3.19965e-07	2.64154e-05	6.63265
ENSMUSG00000075028	-0.489292	4.88097	-7.19444	3.26107e-07	2.66715e-05	6.64401
ENSMUSG00000027398	1.53035	8.57126	7.19205	3.27812e-07	2.66715e-05	6.7091
ENSMUSG00000039994	-0.825129	4.19309	-7.19163	3.28115e-07	2.66715e-05	6.67566
ENSMUSG00000006494	-0.923495	5.78318	-7.17046	3.43661e-07	2.76717e-05	6.56884
ENSMUSG00000021476	-0.633005	4.1505	-7.17012	3.4391e-07	2.76717e-05	6.62255
ENSMUSG00000038894	0.916282	4.60334	7.15542	3.55159e-07	2.84324e-05	6.60702
ENSMUSG00000070942	-1.34938	1.16399	-7.14692	3.61832e-07	2.88211e-05	6.69489
ENSMUSG00000051439	2.03758	4.64627	7.13351	3.72623e-07	2.94932e-05	6.53333
ENSMUSG00000026199	-0.529875	5.08587	-7.13184	3.73991e-07	2.94932e-05	6.49509
ENSMUSG00000026761	-0.624103	4.90401	-7.12716	3.77844e-07	2.96495e-05	6.49166
ENSMUSG00000097290	-0.876883	4.19865	-7.08908	4.108e-07	3.20363e-05	6.47439
ENSMUSG00000033760	-0.701925	5.02093	-7.08296	4.16362e-07	3.20363e-05	6.38633
ENSMUSG00000038128	-1.00454	4.2963	-7.08225	4.1701e-07	3.20363e-05	6.45741
ENSMUSG00000047146	-1.62352	2.32271	-7.08053	4.18594e-07	3.20363e-05	6.596
ENSMUSG00000042104	-0.8866	2.81511	-7.08031	4.18794e-07	3.20363e-05	6.57859
ENSMUSG00000078651	-0.79204	3.06786	-7.07858	4.20387e-07	3.20363e-05	6.56654
ENSMUSG00000039048	-0.416582	4.64068	-7.07273	4.25837e-07	3.22964e-05	6.40192
ENSMUSG00000001025	1.22498	6.78401	7.06497	4.33171e-07	3.26962e-05	6.34708
ENSMUSG00000025505	-0.635743	4.19627	-7.06041	4.37538e-07	3.28098e-05	6.41287
ENSMUSG00000030846	-0.463596	6.31651	-7.05661	4.41219e-07	3.28098e-05	6.30931
ENSMUSG00000043924	-1.5025	0.826613	-7.05653	4.41293e-07	3.28098e-05	6.54536
ENSMUSG00000097634	1.11299	4.2312	7.05462	4.43161e-07	3.28098e-05	6.40217
ENSMUSG00000019850	0.835502	6.12851	7.05106	4.46643e-07	3.28098e-05	6.29739
ENSMUSG00000031601	-0.429222	5.42164	-7.0506	4.47097e-07	3.28098e-05	6.29958
ENSMUSG00000028483	-0.775728	4.46233	-7.03453	4.6322e-07	3.38364e-05	6.31292
ENSMUSG00000050668	-0.599392	4.62532	-7.02853	4.69391e-07	3.407e-05	6.28485
ENSMUSG00000098206	-3.03214	-1.30522	-7.02725	4.70717e-07	3.407e-05	5.18612
ENSMUSG00000036067	1.09692	5.5669	7.01939	4.78956e-07	3.42986e-05	6.23764
ENSMUSG00000040325	-0.622299	6.26549	-7.01832	4.80091e-07	3.42986e-05	6.22397
ENSMUSG00000043090	-0.918046	5.19616	-7.01806	4.80366e-07	3.42986e-05	6.24834
ENSMUSG00000074075	1.97941	-0.770786	7.00323	4.96355e-07	3.52361e-05	5.27278
ENSMUSG00000045665	0.632468	4.90633	7.00133	4.98444e-07	3.52361e-05	6.21931
ENSMUSG00000058706	-0.545957	6.34077	-6.99977	5.00166e-07	3.52361e-05	6.18515
ENSMUSG00000048215	-1.51884	2.16152	-6.98494	5.16839e-07	3.62496e-05	6.38508
ENSMUSG00000034120	-0.552726	7.57182	-6.97656	5.26508e-07	3.64808e-05	6.18523
ENSMUSG00000050954	-0.617065	4.71035	-6.97644	5.26646e-07	3.64808e-05	6.17423
ENSMUSG00000079065	-1.0083	3.27697	-6.9761	5.27039e-07	3.64808e-05	6.32734
ENSMUSG00000002428	-0.443794	6.048	-6.95486	5.52419e-07	3.80713e-05	6.07947
ENSMUSG00000029720	-0.471688	7.39107	-6.94424	5.65583e-07	3.88097e-05	6.11101
ENSMUSG00000037997	-0.800276	5.02542	-6.93531	5.76896e-07	3.94154e-05	6.06221
ENSMUSG00000089756	-1.10072	3.63778	-6.93122	5.82152e-07	3.96038e-05	6.19319
ENSMUSG00000022194	-0.598097	6.62704	-6.92444	5.90982e-07	4.00327e-05	6.02591
ENSMUSG00000085289	1.92626	1.02314	6.9202	5.9657e-07	4.02393e-05	6.00832
ENSMUSG00000066880	-0.547139	5.0157	-6.91665	6.01285e-07	4.02586e-05	6.01064
ENSMUSG00000085603	-0.993381	5.3149	-6.91617	6.01936e-07	4.02586e-05	6.01207
ENSMUSG00000059772	-1.47305	6.99228	-6.91385	6.05041e-07	4.02962e-05	6.02813
ENSMUSG00000027770	-0.546404	5.56065	-6.90144	6.21952e-07	4.12492e-05	5.96159
ENSMUSG00000072739	-0.996532	2.32673	-6.8988	6.2562e-07	4.12724e-05	6.20893
ENSMUSG00000089978	-1.31411	2.18461	-6.89744	6.27509e-07	4.12724e-05	6.20758
ENSMUSG00000035585	0.618233	4.01607	6.88474	6.45485e-07	4.22793e-05	6.05382
ENSMUSG00000032501	1.21084	4.86808	6.85451	6.90439e-07	4.50377e-05	5.92769
ENSMUSG00000057147	-0.758077	3.7539	-6.84901	6.98946e-07	4.52785e-05	5.98969
ENSMUSG00000022668	-0.694888	3.81058	-6.84844	6.99845e-07	4.52785e-05	5.97074
ENSMUSG00000023284	-0.733152	3.25359	-6.82973	7.29664e-07	4.70159e-05	5.95768
ENSMUSG00000029062	-0.670042	7.04995	-6.82709	7.33975e-07	4.71022e-05	5.82385
ENSMUSG00000047036	-0.544509	5.86984	-6.8229	7.40876e-07	4.73533e-05	5.78333
ENSMUSG00000064360	-0.995727	7.22344	-6.81652	7.51519e-07	4.78407e-05	5.80722
ENSMUSG00000046807	-0.883685	2.83756	-6.81471	7.54553e-07	4.78417e-05	5.9886
ENSMUSG00000048107	1.16916	5.25896	6.81187	7.59357e-07	4.79544e-05	5.80108
ENSMUSG00000022884	-0.777194	8.89881	-6.80373	7.733e-07	4.85213e-05	5.8636
ENSMUSG00000056290	-1.30361	7.55119	-6.80259	7.75274e-07	4.85213e-05	5.80502
ENSMUSG00000037300	-0.608644	5.7968	-6.8013	7.77517e-07	4.85213e-05	5.7357
ENSMUSG00000055436	-0.724986	7.46888	-6.7991	7.81346e-07	4.85691e-05	5.78391
ENSMUSG00000000568	-0.755667	7.04395	-6.79677	7.85426e-07	4.8632e-05	5.75992
ENSMUSG00000031390	-0.891807	2.99482	-6.79164	7.94485e-07	4.90015e-05	5.93741
ENSMUSG00000022607	1.06356	3.50636	6.78907	7.99078e-07	4.90937e-05	5.90684
ENSMUSG00000036966	0.433096	5.24387	6.78042	8.14687e-07	4.98595e-05	5.70025
ENSMUSG00000085408	-1.57271	0.208939	-6.76726	8.39058e-07	5.10882e-05	5.59131
ENSMUSG00000028063	1.44036	4.97238	6.76526	8.42816e-07	5.10882e-05	5.7395
ENSMUSG00000072653	-1.04629	3.05741	-6.76441	8.44433e-07	5.10882e-05	5.87158
ENSMUSG00000000823	-0.753748	5.74986	-6.76252	8.4802e-07	5.11012e-05	5.64964
ENSMUSG00000016921	-0.683941	7.65661	-6.7609	8.51095e-07	5.11012e-05	5.70501
ENSMUSG00000004980	-0.868523	9.21316	-6.75808	8.56487e-07	5.11294e-05	5.78528
ENSMUSG00000030795	-1.08469	8.07528	-6.75729	8.58017e-07	5.11294e-05	5.73199
ENSMUSG00000029911	-0.584501	4.5397	-6.74625	8.79519e-07	5.22144e-05	5.67483
ENSMUSG00000097588	-1.18336	1.54517	-6.73535	9.01281e-07	5.31118e-05	5.85637
ENSMUSG00000025450	-0.763576	2.96419	-6.73495	9.02088e-07	5.31118e-05	5.80857
ENSMUSG00000042406	0.563844	7.08984	6.73332	9.05402e-07	5.31118e-05	5.60563
ENSMUSG00000033623	-0.377661	4.86691	-6.73202	9.08038e-07	5.31118e-05	5.61289
ENSMUSG00000026349	-0.588835	6.69175	-6.72268	9.2728e-07	5.4038e-05	5.57388
ENSMUSG00000055692	-0.953805	2.25737	-6.71656	9.40118e-07	5.45854e-05	5.81975
ENSMUSG00000036733	0.40088	5.7621	6.71379	9.45982e-07	5.46577e-05	5.53964
ENSMUSG00000055531	-0.703402	6.66852	-6.71272	9.4826e-07	5.46577e-05	5.55455
ENSMUSG00000040061	-0.536763	6.92585	-6.7079	9.58605e-07	5.48685e-05	5.55636
ENSMUSG00000031504	1.06747	2.46937	6.70779	9.58841e-07	5.48685e-05	5.79492
ENSMUSG00000097990	-1.08745	1.05337	-6.70145	9.72603e-07	5.54559e-05	5.74707
ENSMUSG00000021025	0.611628	6.94846	6.69805	9.80053e-07	5.56804e-05	5.52233
ENSMUSG00000035441	1.38649	3.6942	6.68928	9.99593e-07	5.65877e-05	5.65141
ENSMUSG00000031939	-0.738316	4.40675	-6.68551	1.00809e-06	5.68658e-05	5.56413
ENSMUSG00000009535	-0.474146	4.76029	-6.65839	1.07159e-06	6.02332e-05	5.45889
ENSMUSG00000053559	1.03186	2.96748	6.65344	1.08361e-06	6.06938e-05	5.66395
ENSMUSG00000079184	-0.660458	4.97303	-6.65158	1.08818e-06	6.07349e-05	5.43152
ENSMUSG00000019802	-0.513808	6.18577	-6.64879	1.09503e-06	6.0743e-05	5.3928
ENSMUSG00000021969	-0.564698	7.01621	-6.64841	1.09599e-06	6.0743e-05	5.42064
ENSMUSG00000084915	-1.16631	1.62368	-6.64293	1.1096e-06	6.12834e-05	5.64227
ENSMUSG00000022843	-1.10852	1.40165	-6.63652	1.12578e-06	6.1825e-05	5.58308
ENSMUSG00000002346	-0.968293	3.75181	-6.63596	1.12721e-06	6.1825e-05	5.49353
ENSMUSG00000058755	1.91878	4.1754	6.6295	1.14375e-06	6.25161e-05	5.53752
ENSMUSG00000029287	-1.07058	4.44211	-6.62372	1.15878e-06	6.31197e-05	5.41234
ENSMUSG00000009741	-0.460322	7.21769	-6.62082	1.1664e-06	6.31305e-05	5.36707
ENSMUSG00000078495	-0.996087	4.54559	-6.62061	1.16694e-06	6.31305e-05	5.44204
ENSMUSG00000028134	-0.56315	4.34925	-6.61701	1.17647e-06	6.34295e-05	5.38634
ENSMUSG00000036752	0.706641	7.08307	6.61411	1.18422e-06	6.36309e-05	5.34124
ENSMUSG00000038718	0.905134	3.1555	6.60823	1.20004e-06	6.4263e-05	5.46827
ENSMUSG00000080727	-1.25505	1.92154	-6.60363	1.2126e-06	6.47167e-05	5.57268
ENSMUSG00000074604	-1.31255	3.73063	-6.59585	1.23412e-06	6.48712e-05	5.44257
ENSMUSG00000032199	-0.883859	5.70399	-6.59561	1.2348e-06	6.48712e-05	5.28031
ENSMUSG00000069208	-0.792805	2.6916	-6.59551	1.23506e-06	6.48712e-05	5.53274
ENSMUSG00000087569	1.08921	3.60376	6.59519	1.23595e-06	6.48712e-05	5.48146
ENSMUSG00000087235	1.08921	3.60376	6.59519	1.23595e-06	6.48712e-05	5.48146
ENSMUSG00000071866	-0.727365	7.86929	-6.59181	1.24546e-06	6.51542e-05	5.33662
ENSMUSG00000002981	0.399669	6.371	6.58813	1.25587e-06	6.54829e-05	5.25809
ENSMUSG00000050709	-1.06981	1.99216	-6.58225	1.2727e-06	6.60692e-05	5.50928
ENSMUSG00000049091	0.928668	5.60385	6.58129	1.27545e-06	6.60692e-05	5.24602
ENSMUSG00000021413	-0.646146	6.9726	-6.57553	1.29219e-06	6.66307e-05	5.25241
ENSMUSG00000086047	-1.31823	0.986387	-6.57468	1.2947e-06	6.66307e-05	5.45441
ENSMUSG00000045767	-0.392741	6.57903	-6.56949	1.30999e-06	6.69513e-05	5.22372
ENSMUSG00000039205	-0.441903	6.05339	-6.56877	1.31212e-06	6.69513e-05	5.20752
ENSMUSG00000030386	-0.823174	3.49119	-6.56828	1.3136e-06	6.69513e-05	5.39914
ENSMUSG00000020070	-0.801057	4.77916	-6.56389	1.32672e-06	6.72741e-05	5.24658
ENSMUSG00000020464	-0.546423	4.6524	-6.56306	1.32922e-06	6.72741e-05	5.25501
ENSMUSG00000000600	-0.583897	5.40103	-6.56192	1.33266e-06	6.72741e-05	5.20023
ENSMUSG00000043833	-1.13942	1.53685	-6.55807	1.34432e-06	6.76472e-05	5.47688
ENSMUSG00000023495	0.919002	2.06192	6.55612	1.35027e-06	6.77316e-05	5.47289
ENSMUSG00000027358	2.02866	1.31605	6.54479	1.38544e-06	6.92764e-05	5.29373
ENSMUSG00000029482	0.714277	5.05205	6.53804	1.40679e-06	6.99583e-05	5.17279
ENSMUSG00000028069	-0.920606	3.6297	-6.53769	1.4079e-06	6.99583e-05	5.31521
ENSMUSG00000022257	1.33421	1.5053	6.53592	1.4136e-06	7.00217e-05	5.40311
ENSMUSG00000097142	1.10068	5.27684	6.53084	1.42997e-06	7.06122e-05	5.16171
ENSMUSG00000031618	1.42777	2.28916	6.52701	1.44248e-06	7.10084e-05	5.39624
ENSMUSG00000038884	-0.769681	4.52155	-6.51745	1.47411e-06	7.23411e-05	5.16189
ENSMUSG00000018924	2.21245	3.05243	6.51201	1.49246e-06	7.30153e-05	5.33636
ENSMUSG00000037475	-0.578345	6.84099	-6.50596	1.51314e-06	7.37992e-05	5.09026
ENSMUSG00000056418	-1.41479	2.60314	-6.50318	1.52271e-06	7.40383e-05	5.32666
ENSMUSG00000037204	0.589031	4.19218	6.49428	1.55385e-06	7.53215e-05	5.15288
ENSMUSG00000006462	2.35324	-0.136049	6.48724	1.57895e-06	7.63045e-05	4.67223
ENSMUSG00000060510	-0.636094	5.14796	-6.48259	1.59573e-06	7.68813e-05	5.03263
ENSMUSG00000029283	-0.778118	3.71341	-6.48059	1.603e-06	7.69974e-05	5.17623
ENSMUSG00000029713	0.414414	8.08491	6.47358	1.62879e-06	7.79999e-05	5.08056
ENSMUSG00000056260	-1.00183	5.92409	-6.47037	1.64074e-06	7.83357e-05	4.99424
ENSMUSG00000014873	-0.556741	4.37181	-6.46158	1.67392e-06	7.96794e-05	5.05269
ENSMUSG00000034349	-0.960966	7.57284	-6.45406	1.70285e-06	8.06473e-05	5.00669
ENSMUSG00000030614	-0.768615	3.52433	-6.45366	1.70442e-06	8.06473e-05	5.11966
ENSMUSG00000070462	0.59358	4.54846	6.44911	1.72218e-06	8.11544e-05	5.03195
ENSMUSG00000026031	-0.425354	7.13161	-6.44822	1.72567e-06	8.11544e-05	4.96714
ENSMUSG00000028680	1.36828	2.73871	6.447	1.7305e-06	8.11544e-05	5.22959
ENSMUSG00000012126	-0.746651	3.69075	-6.42959	1.80062e-06	8.41935e-05	5.05722
ENSMUSG00000050188	0.691802	3.55149	6.42605	1.8152e-06	8.44583e-05	5.0715
ENSMUSG00000002983	0.582813	5.27054	6.42564	1.81694e-06	8.44583e-05	4.90579
ENSMUSG00000030428	-2.2635	-0.912687	-6.41189	1.87486e-06	8.68958e-05	4.45293
ENSMUSG00000047583	-0.942938	1.9724	-6.40968	1.88436e-06	8.70817e-05	5.15434
ENSMUSG00000024014	0.808724	7.20279	6.40737	1.89435e-06	8.72886e-05	4.88027
ENSMUSG00000033906	-1.20117	2.78576	-6.40553	1.90234e-06	8.74029e-05	5.08966
ENSMUSG00000026034	-0.807547	8.23745	-6.39671	1.94105e-06	8.89237e-05	4.91186
ENSMUSG00000096996	-0.867409	2.18384	-6.39493	1.949e-06	8.89978e-05	5.12052
ENSMUSG00000057191	0.45177	6.9703	6.3938	1.95404e-06	8.89978e-05	4.83516
ENSMUSG00000042408	-0.701264	4.62718	-6.39257	1.95951e-06	8.89978e-05	4.87919
ENSMUSG00000050628	0.609527	5.79846	6.37929	2.01997e-06	9.14817e-05	4.77773
ENSMUSG00000020491	-0.726097	3.78146	-6.37436	2.04289e-06	9.22559e-05	4.87491
ENSMUSG00000031878	-0.584109	4.8818	-6.36599	2.08245e-06	9.37751e-05	4.78469
ENSMUSG00000049871	-0.843332	5.74605	-6.36353	2.0942e-06	9.38979e-05	4.74125
ENSMUSG00000076613	2.29082	1.45235	6.36294	2.09702e-06	9.38979e-05	4.93126
ENSMUSG00000032580	-0.614152	7.86968	-6.36159	2.10354e-06	9.39246e-05	4.81105
ENSMUSG00000022974	-0.431331	5.82124	-6.35798	2.121e-06	9.4438e-05	4.72445
ENSMUSG00000037355	-0.800242	5.4485	-6.35635	2.12894e-06	9.45261e-05	4.73075
ENSMUSG00000032534	-0.525781	4.74045	-6.35482	2.13639e-06	9.45919e-05	4.76762
ENSMUSG00000048277	0.636576	6.03376	6.35185	2.15098e-06	9.49727e-05	4.71514
ENSMUSG00000025221	-1.54319	0.37649	-6.34718	2.17413e-06	9.5728e-05	4.79399
ENSMUSG00000024186	-1.15195	2.54003	-6.34494	2.18534e-06	9.58144e-05	4.95809
ENSMUSG00000033439	-0.668576	3.79276	-6.3435	2.19254e-06	9.58144e-05	4.84451
ENSMUSG00000024725	0.393107	7.01575	6.34317	2.19422e-06	9.58144e-05	4.72147
ENSMUSG00000037032	0.954333	2.13304	6.33699	2.22552e-06	9.69141e-05	4.99365
ENSMUSG00000002109	-0.797784	4.95723	-6.33002	2.26142e-06	9.82078e-05	4.70662
ENSMUSG00000054135	-1.8274	-0.184982	-6.32824	2.27066e-06	9.83393e-05	4.66538
ENSMUSG00000027995	1.33039	5.4703	6.32288	2.29877e-06	9.92854e-05	4.66656
ENSMUSG00000040929	-0.739853	4.59039	-6.32091	2.30918e-06	9.93724e-05	4.70162
ENSMUSG00000030165	-1.07858	5.14158	-6.32013	2.31332e-06	9.93724e-05	4.64477
ENSMUSG00000076472	-1.94558	1.18116	-6.31665	2.33188e-06	9.98601e-05	4.92786
ENSMUSG00000027803	3.07515	1.97344	6.31565	2.33727e-06	9.98601e-05	4.9312
ENSMUSG00000019373	-0.34431	4.87153	-6.31165	2.35882e-06	0.000100434	4.65186
ENSMUSG00000031132	-1.33689	2.36043	-6.31081	2.36337e-06	0.000100434	4.92031
ENSMUSG00000066613	-0.96401	3.93608	-6.30963	2.36981e-06	0.000100438	4.80045
ENSMUSG00000061414	-0.998955	2.0303	-6.30722	2.38296e-06	0.000100523	4.9303
ENSMUSG00000046245	0.818535	6.37514	6.3063	2.38801e-06	0.000100523	4.61636
ENSMUSG00000061758	-0.618759	4.00062	-6.30578	2.39083e-06	0.000100523	4.74679
ENSMUSG00000024462	-0.560355	5.90699	-6.30265	2.4081e-06	0.000100981	4.59838
ENSMUSG00000033467	0.569538	5.18786	6.29678	2.4408e-06	0.000102082	4.62296
ENSMUSG00000026074	-0.374478	7.56073	-6.29087	2.47422e-06	0.000103208	4.62692
ENSMUSG00000038312	0.451886	5.67945	6.28639	2.49984e-06	0.000103834	4.56037
ENSMUSG00000086877	-1.31929	0.420362	-6.28595	2.50234e-06	0.000103834	4.74666
ENSMUSG00000059878	-0.464047	4.65702	-6.28304	2.51916e-06	0.000104129	4.59931
ENSMUSG00000066677	-1.28288	4.90081	-6.28245	2.52259e-06	0.000104129	4.66426
ENSMUSG00000002228	-0.758873	3.45739	-6.27609	2.55974e-06	0.000105388	4.65623
ENSMUSG00000090173	-0.813485	2.28459	-6.26939	2.59953e-06	0.000106749	4.78662
ENSMUSG00000087267	0.803507	2.78562	6.2654	2.62353e-06	0.000107456	4.76198
ENSMUSG00000018666	-0.544148	5.50055	-6.26291	2.63858e-06	0.00010753	4.51195
ENSMUSG00000037608	-0.58392	7.21506	-6.26286	2.63889e-06	0.00010753	4.54621
ENSMUSG00000047959	0.92673	4.87197	6.2517	2.70763e-06	0.000110048	4.55097
ENSMUSG00000053080	-1.35698	1.75785	-6.25006	2.71784e-06	0.00011018	4.77495
ENSMUSG00000041671	-0.469229	4.08249	-6.24616	2.74241e-06	0.000110893	4.59056
ENSMUSG00000020268	-0.88881	2.02606	-6.24058	2.77789e-06	0.000112042	4.74115
ENSMUSG00000056735	-1.01051	2.17705	-6.23784	2.79547e-06	0.000112464	4.77762
ENSMUSG00000097180	-1.13175	2.20246	-6.22885	2.85405e-06	0.00011453	4.7211
ENSMUSG00000017418	-0.747495	4.47247	-6.22741	2.86358e-06	0.000114623	4.51226
ENSMUSG00000022185	-0.55979	8.0642	-6.21906	2.91929e-06	0.000116558	4.48518
ENSMUSG00000027829	-0.424872	7.2521	-6.21523	2.94516e-06	0.000117296	4.43716
ENSMUSG00000079555	-0.825106	4.14374	-6.21088	2.97488e-06	0.000118183	4.50174
ENSMUSG00000064368	-1.34546	8.80848	-6.20921	2.98641e-06	0.000118344	4.523
ENSMUSG00000091227	-1.80488	0.401489	-6.2053	3.01345e-06	0.000119118	4.54409
ENSMUSG00000078622	-0.386719	6.35831	-6.19975	3.05237e-06	0.000120356	4.36659
ENSMUSG00000014504	-0.447139	4.32652	-6.17925	3.20046e-06	0.000125882	4.40119
ENSMUSG00000079363	-1.25856	6.03754	-6.1758	3.22611e-06	0.000126577	4.31338
ENSMUSG00000028793	0.724165	7.17515	6.17414	3.23848e-06	0.000126613	4.32517
ENSMUSG00000022969	0.422467	6.42648	6.17354	3.243e-06	0.000126613	4.30531
ENSMUSG00000074862	-0.499121	3.48089	-6.16746	3.28895e-06	0.000128091	4.46662
ENSMUSG00000057315	0.639344	3.59524	6.15955	3.34973e-06	0.000129795	4.44629
ENSMUSG00000035828	0.693297	4.03618	6.15879	3.35557e-06	0.000129795	4.43143
ENSMUSG00000035024	-0.520021	4.77031	-6.15858	3.35725e-06	0.000129795	4.30349
ENSMUSG00000039747	-0.478292	7.10906	-6.15604	3.37705e-06	0.000130242	4.29376
ENSMUSG00000021738	-0.495235	6.12575	-6.14873	3.43464e-06	0.000132142	4.24153
ENSMUSG00000079138	3.77477	-1.58841	6.14315	3.47934e-06	0.000133537	3.01069
ENSMUSG00000067768	-1.05441	4.1965	-6.13741	3.52598e-06	0.000135001	4.31289
ENSMUSG00000064128	-0.703117	3.46602	-6.11851	3.68387e-06	0.000140706	4.40221
ENSMUSG00000044867	-1.03285	3.89614	-6.11714	3.69561e-06	0.000140815	4.33369
ENSMUSG00000027854	-0.391257	5.72218	-6.11285	3.73253e-06	0.000141881	4.15653
ENSMUSG00000048271	-0.532383	7.47131	-6.11179	3.74179e-06	0.000141893	4.20777
ENSMUSG00000001127	-0.530131	6.65336	-6.10748	3.77935e-06	0.000142975	4.16103
ENSMUSG00000004842	-1.90591	0.67682	-6.10531	3.79844e-06	0.000143355	4.38679
ENSMUSG00000018481	-0.395018	5.92948	-6.10101	3.83652e-06	0.000144448	4.12836
ENSMUSG00000008200	-0.60389	7.51439	-6.09044	3.93184e-06	0.000147686	4.16216
ENSMUSG00000026728	0.641524	9.29375	6.08739	3.95985e-06	0.000148387	4.26932
ENSMUSG00000096687	-0.824784	2.09773	-6.08293	4.00112e-06	0.00014932	4.42754
ENSMUSG00000031600	-0.471715	5.30199	-6.08266	4.00359e-06	0.00014932	4.09512
ENSMUSG00000062929	-0.563942	4.01669	-6.0799	4.02933e-06	0.000149927	4.1903
ENSMUSG00000022231	2.34017	2.69194	6.07677	4.05875e-06	0.000150668	4.41787
ENSMUSG00000031562	-1.32406	0.590175	-6.07134	4.11033e-06	0.000152195	4.27071
ENSMUSG00000096931	-1.06474	1.90987	-6.07042	4.11909e-06	0.000152195	4.39409
ENSMUSG00000020516	-0.487644	5.60975	-6.05396	4.27991e-06	0.00015777	4.02185
ENSMUSG00000002948	-0.437706	6.27097	-6.0402	4.41922e-06	0.000162471	3.99077
ENSMUSG00000024457	-0.664361	7.08706	-6.03935	4.42796e-06	0.000162471	4.02561
ENSMUSG00000041921	-0.52215	4.60695	-6.03651	4.45733e-06	0.000163171	4.04126
ENSMUSG00000025010	-0.644281	4.58223	-6.03544	4.46838e-06	0.000163199	4.04095
ENSMUSG00000032528	-1.58885	4.7296	-6.02238	4.60648e-06	0.000167514	4.01446
ENSMUSG00000024045	-0.690153	7.41681	-6.02085	4.62297e-06	0.000167514	3.99387
ENSMUSG00000010392	-0.416986	5.60333	-6.02038	4.62794e-06	0.000167514	3.94244
ENSMUSG00000027778	-0.829448	4.99032	-6.0203	4.62881e-06	0.000167514	3.97363
ENSMUSG00000028292	-0.639676	3.5616	-6.01884	4.64467e-06	0.000167705	4.14158
ENSMUSG00000041460	-0.906388	2.53421	-6.00718	4.77265e-06	0.000171594	4.21035
ENSMUSG00000021772	-0.728414	3.33448	-6.00706	4.774e-06	0.000171594	4.13316
ENSMUSG00000038241	-0.453559	6.38173	-6.00445	4.80309e-06	0.000172248	3.91311
ENSMUSG00000005506	-0.582344	7.3686	-6.00116	4.84015e-06	0.000173082	3.94725
ENSMUSG00000026500	-0.952012	2.92008	-6.00045	4.84817e-06	0.000173082	4.17706
ENSMUSG00000078700	-0.947217	2.10511	-5.99511	4.9089e-06	0.00017485	4.2298
ENSMUSG00000053898	0.470144	5.20087	5.99417	4.91975e-06	0.00017485	3.90063
ENSMUSG00000003541	2.57555	2.89032	5.99094	4.95688e-06	0.000175775	4.19978
ENSMUSG00000085241	-0.689572	2.36515	-5.98723	5.00005e-06	0.000176707	4.19235
ENSMUSG00000039795	-0.609267	3.97551	-5.98677	5.00546e-06	0.000176707	3.99732
ENSMUSG00000037318	-0.755901	7.3929	-5.98173	5.06464e-06	0.000178399	3.90425
ENSMUSG00000051890	-1.25104	3.53364	-5.97105	5.19253e-06	0.000182498	4.00593
ENSMUSG00000031816	-0.547394	3.55973	-5.9667	5.24561e-06	0.000183956	4.00816
ENSMUSG00000022604	-0.944084	5.19772	-5.9617	5.30724e-06	0.000185706	3.82942
ENSMUSG00000024287	-0.620253	4.93108	-5.94952	5.46056e-06	0.000190573	3.80902
ENSMUSG00000039917	-0.533786	3.86223	-5.94875	5.47035e-06	0.000190573	3.92995
ENSMUSG00000094777	1.18499	3.71913	5.94776	5.48304e-06	0.000190596	3.98329
ENSMUSG00000020680	-0.735749	6.46943	-5.94372	5.53515e-06	0.000191986	3.77094
ENSMUSG00000027901	-0.633426	5.91709	-5.94063	5.57526e-06	0.000192891	3.75499
ENSMUSG00000040840	-1.01764	2.1054	-5.93984	5.58556e-06	0.000192891	4.11665
ENSMUSG00000027799	2.3794	2.74486	5.93507	5.64829e-06	0.000194633	4.07743
ENSMUSG00000061950	0.32537	6.05754	5.9311	5.70105e-06	0.000196025	3.73175
ENSMUSG00000029267	-0.544094	5.27565	-5.92528	5.77926e-06	0.000198284	3.73335
ENSMUSG00000078894	-0.490808	3.32809	-5.92406	5.79569e-06	0.000198418	3.92155
ENSMUSG00000027397	-0.6623	6.33545	-5.92249	5.81702e-06	0.000198719	3.71588
ENSMUSG00000020362	-0.441364	6.98748	-5.92022	5.84814e-06	0.000199352	3.73885
ENSMUSG00000023274	-1.27471	6.1174	-5.9193	5.86073e-06	0.000199353	3.71998
ENSMUSG00000053192	-0.681267	3.43019	-5.9133	5.94368e-06	0.000201741	3.90361
ENSMUSG00000031662	0.409921	5.63806	5.90721	6.0291e-06	0.000204204	3.68173
ENSMUSG00000029173	-0.453745	4.19022	-5.90478	6.06347e-06	0.00020493	3.77318
ENSMUSG00000020074	-0.443735	6.35037	-5.90372	6.0786e-06	0.000205004	3.6729
ENSMUSG00000029684	-0.564736	4.66146	-5.89748	6.16814e-06	0.000207531	3.7086
ENSMUSG00000028211	-0.517528	7.63212	-5.89668	6.17973e-06	0.000207531	3.71796
ENSMUSG00000032425	-0.512759	5.42744	-5.8949	6.20556e-06	0.000207958	3.66128
ENSMUSG00000001248	-0.751778	7.69557	-5.89079	6.2656e-06	0.000208948	3.71252
ENSMUSG00000076928	-1.17854	4.99261	-5.89071	6.26679e-06	0.000208948	3.66202
ENSMUSG00000021120	-0.602588	3.34881	-5.89018	6.27463e-06	0.000208948	3.85672
ENSMUSG00000094828	-1.43629	0.299242	-5.8838	6.36919e-06	0.000211446	3.83792
ENSMUSG00000045551	1.89464	4.36917	5.88332	6.37633e-06	0.000211446	3.77712
ENSMUSG00000024560	-0.402432	5.9464	-5.88046	6.4193e-06	0.00021203	3.61167
ENSMUSG00000020723	-1.14921	0.114087	-5.88037	6.42069e-06	0.00021203	3.91123
ENSMUSG00000028191	0.485464	6.64681	5.87612	6.48494e-06	0.000213707	3.6217
ENSMUSG00000068854	-0.804307	3.10734	-5.87254	6.53963e-06	0.000214612	3.89074
ENSMUSG00000040044	-0.589424	5.52455	-5.87209	6.54658e-06	0.000214612	3.59441
ENSMUSG00000029192	0.445721	7.22194	5.87167	6.55304e-06	0.000214612	3.63604
ENSMUSG00000013160	0.524864	6.09469	5.86829	6.60526e-06	0.000215876	3.58584
ENSMUSG00000066621	-0.819072	6.81875	-5.85859	6.75735e-06	0.000220393	3.58593
ENSMUSG00000038650	0.629736	5.78747	5.85618	6.79577e-06	0.000221191	3.55828
ENSMUSG00000042349	-0.780764	6.19733	-5.8533	6.84187e-06	0.000222234	3.56172
ENSMUSG00000059142	-0.941253	4.46039	-5.84982	6.89798e-06	0.000223599	3.59851
ENSMUSG00000027365	-0.460029	6.72613	-5.84781	6.93076e-06	0.000224203	3.55559
ENSMUSG00000068882	-0.576385	6.60813	-5.84541	6.96995e-06	0.000225011	3.54637
ENSMUSG00000069911	1.39152	0.487763	5.84298	7.0098e-06	0.000225838	3.84443
ENSMUSG00000016933	-0.929263	6.18002	-5.83884	7.07832e-06	0.000227137	3.5218
ENSMUSG00000043263	-0.622258	7.38977	-5.83881	7.07879e-06	0.000227137	3.52679
ENSMUSG00000023272	0.585152	3.9832	5.83716	7.10632e-06	0.00022756	3.64679
ENSMUSG00000085028	-0.837443	4.70669	-5.83244	7.18561e-06	0.000229635	3.54762
ENSMUSG00000085438	-0.421615	8.00574	-5.82816	7.25822e-06	0.000231205	3.56855
ENSMUSG00000057666	0.577798	8.23944	5.82743	7.27073e-06	0.000231205	3.53864
ENSMUSG00000020376	0.488997	6.61235	5.82698	7.27849e-06	0.000231205	3.50221
ENSMUSG00000044037	-1.68944	5.902	-5.82506	7.31143e-06	0.000231543	3.50323
ENSMUSG00000016526	1.40701	2.30589	5.82466	7.31833e-06	0.000231543	3.85851
ENSMUSG00000020228	-0.346158	5.5284	-5.82267	7.35262e-06	0.000231804	3.48009
ENSMUSG00000056144	-0.760837	6.30168	-5.82249	7.35583e-06	0.000231804	3.48086
ENSMUSG00000052270	1.38959	5.15557	5.82008	7.3976e-06	0.000232657	3.49811
ENSMUSG00000020495	0.470917	4.50803	5.81637	7.46244e-06	0.000234232	3.55287
ENSMUSG00000019897	-0.551869	4.8455	-5.80674	7.63341e-06	0.000239125	3.4773
ENSMUSG00000039997	-0.671375	7.72543	-5.80338	7.69408e-06	0.00024055	3.47767
ENSMUSG00000027985	-1.69241	6.19502	-5.79981	7.75892e-06	0.0002421	3.4438
ENSMUSG00000008734	-2.17634	0.0530729	-5.79672	7.81569e-06	0.000243392	3.32664
ENSMUSG00000020523	-0.319253	5.47829	-5.79351	7.875e-06	0.000244758	3.41341
ENSMUSG00000010097	-0.625628	7.70935	-5.79049	7.93124e-06	0.000246024	3.47318
ENSMUSG00000030393	-1.50172	0.064336	-5.78896	7.95983e-06	0.000246428	3.64013
ENSMUSG00000032030	-0.414365	5.04185	-5.78068	8.11655e-06	0.00025079	3.40758
ENSMUSG00000028393	0.728397	3.37692	5.77958	8.13773e-06	0.000250956	3.57208
ENSMUSG00000076431	-1.33265	2.4495	-5.77634	8.20009e-06	0.000252388	3.75653
ENSMUSG00000025145	-0.403946	4.69536	-5.77285	8.2678e-06	0.000253979	3.42014
ENSMUSG00000042492	0.43333	6.36664	5.76315	8.45901e-06	0.00025935	3.34265
ENSMUSG00000072762	-0.881641	3.67235	-5.76111	8.49987e-06	0.000259699	3.52531
ENSMUSG00000031723	1.25627	3.63156	5.76026	8.51698e-06	0.000259699	3.53791
ENSMUSG00000041935	-0.737403	6.51779	-5.76013	8.51957e-06	0.000259699	3.34111
ENSMUSG00000020180	-0.446521	4.85819	-5.75762	8.57021e-06	0.000260742	3.35812
ENSMUSG00000078903	-0.696576	3.97259	-5.75408	8.64201e-06	0.000262422	3.43794
ENSMUSG00000039242	-0.416784	5.11326	-5.75023	8.72081e-06	0.000264309	3.32427
ENSMUSG00000029416	0.57369	6.10061	5.74756	8.77609e-06	0.000265162	3.30057
ENSMUSG00000030934	0.518484	5.90917	5.74677	8.79248e-06	0.000265162	3.29886
ENSMUSG00000062761	-0.57401	4.79201	-5.74577	8.81315e-06	0.000265162	3.33811
ENSMUSG00000057842	-0.629327	4.27735	-5.74564	8.81587e-06	0.000265162	3.40073
ENSMUSG00000024780	-0.493467	4.52176	-5.7413	8.90656e-06	0.000267382	3.35932
ENSMUSG00000064345	-1.2293	9.74492	-5.74028	8.92821e-06	0.000267526	3.481
ENSMUSG00000048191	-0.888192	3.18505	-5.73792	8.97807e-06	0.000268512	3.49909
ENSMUSG00000067873	-0.569207	5.52467	-5.73425	9.05614e-06	0.000270337	3.27369
ENSMUSG00000037408	0.805052	4.78308	5.73304	9.08211e-06	0.000270385	3.32805
ENSMUSG00000046329	-0.621851	4.10513	-5.73258	9.09186e-06	0.000270385	3.37488
ENSMUSG00000078879	-0.888236	2.33374	-5.72895	9.17009e-06	0.000271708	3.61275
ENSMUSG00000093452	-1.38528	1.22059	-5.72893	9.17062e-06	0.000271708	3.64181
ENSMUSG00000021708	1.30057	3.10567	5.72515	9.25278e-06	0.00027363	3.56932
ENSMUSG00000001687	0.422167	6.95957	5.72213	9.31917e-06	0.00027508	3.27112
ENSMUSG00000090935	-0.439666	5.19631	-5.71936	9.38019e-06	0.000276367	3.25035
ENSMUSG00000025766	-0.978214	2.73555	-5.71488	9.4801e-06	0.000278792	3.56595
ENSMUSG00000021715	-0.596272	3.50751	-5.70833	9.62809e-06	0.00028262	3.42124
ENSMUSG00000086725	-0.934343	2.05876	-5.70181	9.77771e-06	0.000286482	3.57185
ENSMUSG00000021540	-0.538445	5.757	-5.70028	9.81305e-06	0.000286986	3.18704
ENSMUSG00000031309	-0.462395	7.17485	-5.69942	9.83309e-06	0.000287043	3.2298
ENSMUSG00000031659	-0.493746	8.46051	-5.68979	1.00595e-05	0.000293111	3.28423
ENSMUSG00000042677	0.533574	5.55962	5.68654	1.01373e-05	0.0002947	3.16318
ENSMUSG00000026922	0.731724	4.17299	5.68596	1.01512e-05	0.0002947	3.27368
ENSMUSG00000022674	-0.521289	4.24685	-5.68241	1.02369e-05	0.000296644	3.24844
ENSMUSG00000020691	-0.533031	3.90985	-5.68118	1.02667e-05	0.000296834	3.30935
ENSMUSG00000045664	0.887824	3.42021	5.68059	1.02809e-05	0.000296834	3.36757
ENSMUSG00000041754	1.00535	4.46284	5.67881	1.03244e-05	0.000297549	3.22871
ENSMUSG00000030336	-1.09075	5.44515	-5.6649	1.06699e-05	0.000306949	3.1143
ENSMUSG00000035000	-0.819081	5.96496	-5.66186	1.0747e-05	0.000308046	3.10061
ENSMUSG00000022179	0.958015	2.93038	5.66166	1.07522e-05	0.000308046	3.31694
ENSMUSG00000032423	-0.636684	6.91559	-5.66111	1.07664e-05	0.000308046	3.12643
ENSMUSG00000024885	0.684203	5.36191	5.65953	1.08067e-05	0.000308644	3.09833
ENSMUSG00000003762	0.515374	3.78378	5.65855	1.08316e-05	0.000308798	3.26081
ENSMUSG00000005936	0.33319	7.24361	5.65628	1.08901e-05	0.000309908	3.12903
ENSMUSG00000033446	-0.653061	5.02927	-5.65396	1.09501e-05	0.000311059	3.09517
ENSMUSG00000001995	0.679044	5.04825	5.65025	1.10469e-05	0.000312953	3.1089
ENSMUSG00000074102	2.11859	1.37264	5.64989	1.10563e-05	0.000312953	3.4118
ENSMUSG00000031537	-0.428578	8.08795	-5.64263	1.12481e-05	0.000317814	3.1442
ENSMUSG00000019818	-0.459171	7.82331	-5.64076	1.12981e-05	0.000318659	3.12078
ENSMUSG00000017713	-0.915485	2.27421	-5.63853	1.13582e-05	0.000319784	3.42407
ENSMUSG00000024219	0.432212	5.38566	5.63324	1.15013e-05	0.00032324	3.03752
ENSMUSG00000021621	-0.469017	4.23868	-5.63209	1.15328e-05	0.000323553	3.14194
ENSMUSG00000097320	-0.919034	1.81201	-5.62678	1.16791e-05	0.000326532	3.40862
ENSMUSG00000003206	0.760022	4.02388	5.62673	1.16803e-05	0.000326532	3.14258
ENSMUSG00000085882	-1.41088	1.55986	-5.62199	1.18124e-05	0.000329644	3.30582
ENSMUSG00000072235	0.692551	6.99084	5.62044	1.18559e-05	0.000330004	3.02063
ENSMUSG00000045411	-0.831599	6.01476	-5.61988	1.18717e-05	0.000330004	2.99949
ENSMUSG00000009772	0.552472	6.12646	5.61931	1.18877e-05	0.000330004	2.99612
ENSMUSG00000038418	2.99479	4.23661	5.61625	1.19745e-05	0.000330912	3.2293
ENSMUSG00000074733	-0.710246	5.08704	-5.61542	1.19979e-05	0.000330912	3.00752
ENSMUSG00000053175	0.82433	5.42619	5.61454	1.20231e-05	0.000330912	3.0072
ENSMUSG00000078866	-0.528785	4.29415	-5.61436	1.20282e-05	0.000330912	3.0776
ENSMUSG00000037552	-0.417775	6.36277	-5.61357	1.20509e-05	0.000330912	2.98832
ENSMUSG00000035448	1.82533	2.89149	5.61292	1.20694e-05	0.000330912	3.25523
ENSMUSG00000032640	0.507221	6.33096	5.61286	1.20711e-05	0.000330912	2.9863
ENSMUSG00000026705	-0.311591	5.87239	-5.61229	1.20874e-05	0.000330912	2.97635
ENSMUSG00000044807	-0.853691	3.03794	-5.60735	1.223e-05	0.000333771	3.22791
ENSMUSG00000005883	-0.816939	2.62837	-5.60721	1.2234e-05	0.000333771	3.20188
ENSMUSG00000048027	0.905275	2.76441	5.60265	1.23673e-05	0.000336829	3.30029
ENSMUSG00000021495	-0.500315	6.75758	-5.59627	1.25562e-05	0.000341387	2.95552
ENSMUSG00000045730	0.766179	6.63968	5.59431	1.26147e-05	0.000342295	2.95499
ENSMUSG00000056071	1.49805	9.94933	5.59304	1.26528e-05	0.000342295	3.15398
ENSMUSG00000071715	0.508361	7.13435	5.59299	1.26544e-05	0.000342295	2.98891
ENSMUSG00000002504	1.04755	2.03393	5.58939	1.27629e-05	0.000344641	3.09035
ENSMUSG00000053414	1.51707	1.41654	5.58815	1.28007e-05	0.000344879	3.04463
ENSMUSG00000041477	-0.562863	4.22408	-5.58767	1.28152e-05	0.000344879	3.02359
ENSMUSG00000027893	-0.431767	6.30985	-5.58629	1.28574e-05	0.000345429	2.92544
ENSMUSG00000020974	-0.939445	1.77797	-5.57827	1.31047e-05	0.000351477	3.31061
ENSMUSG00000041961	-1.06312	3.53333	-5.57262	1.32817e-05	0.000355623	3.09513
ENSMUSG00000025423	-0.421059	5.0095	-5.5666	1.34734e-05	0.000359271	2.89927
ENSMUSG00000090186	0.928198	5.63864	5.56633	1.3482e-05	0.000359271	2.87683
ENSMUSG00000094626	-1.20065	1.60545	-5.56574	1.3501e-05	0.000359271	3.28278
ENSMUSG00000024867	1.23158	3.50394	5.5655	1.35087e-05	0.000359271	3.11212
ENSMUSG00000027589	-0.40404	6.16158	-5.56478	1.35316e-05	0.000359279	2.86671
ENSMUSG00000097052	-0.807443	2.26118	-5.55782	1.37575e-05	0.000364254	3.21095
ENSMUSG00000040276	-0.887709	4.17867	-5.5573	1.37747e-05	0.000364254	2.96117
ENSMUSG00000028261	-0.618394	3.50315	-5.5569	1.37879e-05	0.000364254	3.06406
ENSMUSG00000032308	-0.535622	5.11907	-5.55468	1.38606e-05	0.000365566	2.86354
ENSMUSG00000024772	0.42542	6.94607	5.55161	1.39623e-05	0.000367635	2.86487
ENSMUSG00000008318	0.706319	5.95168	5.54548	1.41675e-05	0.00037242	2.8229
ENSMUSG00000027176	-0.556948	4.41018	-5.54276	1.42594e-05	0.000374215	2.89548
ENSMUSG00000071793	-0.552397	5.376	-5.53895	1.43893e-05	0.000376664	2.81296
ENSMUSG00000024235	0.444609	5.01032	5.53863	1.44003e-05	0.000376664	2.83795
ENSMUSG00000084806	-0.860591	1.67605	-5.53669	1.4467e-05	0.000377788	3.22042
ENSMUSG00000053347	-0.768735	4.65688	-5.53504	1.45241e-05	0.000378137	2.86996
ENSMUSG00000062198	-0.769721	2.85945	-5.53492	1.45281e-05	0.000378137	3.11414
ENSMUSG00000020869	0.315519	5.46957	5.53292	1.45976e-05	0.000378981	2.7983
ENSMUSG00000057554	-0.333277	5.94895	-5.53261	1.46084e-05	0.000378981	2.7866
ENSMUSG00000022090	0.458796	5.05195	5.52983	1.47051e-05	0.000380868	2.80287
ENSMUSG00000020806	0.396385	6.2093	5.52718	1.47984e-05	0.000382657	2.77697
ENSMUSG00000029446	-0.586205	2.7839	-5.52516	1.48698e-05	0.000383879	3.11077
ENSMUSG00000076612	2.78933	0.516973	5.51901	1.5089e-05	0.000388903	2.96513
ENSMUSG00000079427	0.617956	3.35828	5.51359	1.52851e-05	0.000393318	3.01627
ENSMUSG00000033192	0.860722	5.94192	5.50789	1.54942e-05	0.000397848	2.73507
ENSMUSG00000056501	1.81839	4.44257	5.5073	1.5516e-05	0.000397848	2.90866
ENSMUSG00000001998	-0.47778	4.61498	-5.50675	1.55364e-05	0.000397848	2.79728
ENSMUSG00000096472	0.896228	5.69832	5.50595	1.55661e-05	0.000397965	2.73316
ENSMUSG00000004561	-0.548594	5.0682	-5.5036	1.56536e-05	0.000399558	2.73908
ENSMUSG00000044709	0.550401	4.4876	5.4978	1.58714e-05	0.000404466	2.80468
ENSMUSG00000089998	-1.57027	0.22979	-5.49461	1.59927e-05	0.000406902	3.08323
ENSMUSG00000033530	0.470128	5.15008	5.49031	1.61575e-05	0.000410047	2.70592
ENSMUSG00000021866	0.473196	7.22137	5.49004	1.6168e-05	0.000410047	2.72958
ENSMUSG00000020227	0.735737	5.34741	5.48699	1.62861e-05	0.000412381	2.71118
ENSMUSG00000034612	0.724678	5.06963	5.48554	1.63422e-05	0.000413143	2.7139
ENSMUSG00000027073	3.51185	-2.13125	5.47577	1.6728e-05	0.000422221	2.07832
ENSMUSG00000071713	0.978357	7.80065	5.47198	1.68796e-05	0.000425371	2.74052
ENSMUSG00000028403	-0.39442	5.7921	-5.45944	1.73926e-05	0.00043697	2.61216
ENSMUSG00000045140	-0.66391	3.12079	-5.4593	1.73985e-05	0.00043697	2.8722
ENSMUSG00000034912	-0.787682	2.3429	-5.45872	1.74226e-05	0.00043697	2.97646
ENSMUSG00000004567	-0.364428	4.81782	-5.45677	1.7504e-05	0.000438265	2.65582
ENSMUSG00000024544	-0.778309	2.38842	-5.45599	1.75365e-05	0.000438265	2.99343
ENSMUSG00000045690	-0.910456	2.21066	-5.4555	1.75571e-05	0.000438265	2.99942
ENSMUSG00000079111	0.375597	4.33946	5.45071	1.77592e-05	0.000442611	2.7073
ENSMUSG00000038671	-0.431073	5.58513	-5.44578	1.79693e-05	0.000446691	2.58424
ENSMUSG00000084790	-0.727424	1.89977	-5.44555	1.79793e-05	0.000446691	3.00391
ENSMUSG00000025982	-0.603472	9.26942	-5.44241	1.81147e-05	0.000449352	2.74804
ENSMUSG00000042133	-0.574978	6.56339	-5.44079	1.81851e-05	0.000450393	2.58604
ENSMUSG00000097785	-2.46968	-0.214272	-5.43889	1.82675e-05	0.000451431	2.39792
ENSMUSG00000052291	-0.859746	1.99396	-5.43852	1.82839e-05	0.000451431	2.96738
ENSMUSG00000032093	-1.07155	5.99884	-5.43766	1.83216e-05	0.000451656	2.56942
ENSMUSG00000088835	-1.13208	1.97348	-5.43699	1.83507e-05	0.000451672	2.97597
ENSMUSG00000096401	-0.579833	5.78782	-5.43631	1.83806e-05	0.000451708	2.55874
ENSMUSG00000097149	-1.33348	0.509246	-5.434	1.84825e-05	0.000452644	2.97099
ENSMUSG00000052563	-0.957412	2.72798	-5.43375	1.84936e-05	0.000452644	2.82329
ENSMUSG00000079562	0.364822	6.08151	5.4335	1.85044e-05	0.000452644	2.55126
ENSMUSG00000027168	-1.38308	0.508396	-5.42948	1.8683e-05	0.000456309	2.92722
ENSMUSG00000045248	0.631235	3.67645	5.42848	1.87279e-05	0.000456701	2.77843
ENSMUSG00000042742	-0.532423	5.0703	-5.42648	1.88174e-05	0.00045818	2.55169
ENSMUSG00000086753	-1.22773	1.29772	-5.42484	1.88917e-05	0.00045834	2.96891
ENSMUSG00000028621	-0.841671	2.7284	-5.42481	1.88931e-05	0.00045834	2.89136
ENSMUSG00000028165	-0.310609	5.38463	-5.42442	1.89107e-05	0.00045834	2.53736
ENSMUSG00000062627	-0.52756	6.0404	-5.41855	1.91777e-05	0.000464102	2.51644
ENSMUSG00000079700	1.77286	-0.0450937	5.41718	1.92407e-05	0.000464414	2.79377
ENSMUSG00000078502	-1.16312	5.29928	-5.41646	1.92739e-05	0.000464414	2.51939
ENSMUSG00000026107	-0.643387	6.24548	-5.41636	1.92785e-05	0.000464414	2.52354
ENSMUSG00000045038	0.578374	5.65065	5.41556	1.93156e-05	0.000464599	2.52865
ENSMUSG00000031949	-0.681157	2.88958	-5.41176	1.94919e-05	0.000468131	2.82168
ENSMUSG00000024942	0.345468	7.29108	5.40907	1.96177e-05	0.000470438	2.54682
ENSMUSG00000068587	1.75236	4.16443	5.40762	1.96856e-05	0.000471354	2.61938
ENSMUSG00000055240	-0.453509	4.69041	-5.40636	1.97451e-05	0.000472067	2.53678
ENSMUSG00000049504	-0.398348	5.11868	-5.40296	1.99065e-05	0.000474877	2.50769
ENSMUSG00000023904	0.485168	3.89064	5.40262	1.99226e-05	0.000474877	2.65862
ENSMUSG00000035171	-0.655508	4.84084	-5.40002	2.00471e-05	0.000477127	2.52778
ENSMUSG00000040928	-0.543244	5.56254	-5.39808	2.01402e-05	0.000478625	2.47227
ENSMUSG00000085795	0.739062	4.44976	5.39701	2.01917e-05	0.00047913	2.56507
ENSMUSG00000046841	0.701334	5.54277	5.39557	2.02617e-05	0.000479718	2.46926
ENSMUSG00000026023	-1.02203	1.57141	-5.39525	2.0277e-05	0.000479718	2.89552
ENSMUSG00000086130	-0.388055	5.91479	-5.3946	2.03089e-05	0.000479757	2.45697
ENSMUSG00000040618	0.483526	5.19874	5.39247	2.04125e-05	0.000481487	2.49804
ENSMUSG00000029012	-0.510372	3.95647	-5.38805	2.06298e-05	0.000485889	2.60205
ENSMUSG00000063273	-0.609375	6.24592	-5.37777	2.11437e-05	0.000497253	2.42163
ENSMUSG00000075042	-0.632497	1.88105	-5.37295	2.13893e-05	0.000502284	2.77745
ENSMUSG00000025016	-0.425881	7.58213	-5.36801	2.16437e-05	0.000507506	2.46122
ENSMUSG00000097379	-1.21704	1.0356	-5.36285	2.19133e-05	0.000512911	2.82049
ENSMUSG00000032309	-0.348397	4.93742	-5.36236	2.19389e-05	0.000512911	2.42144
ENSMUSG00000059742	-0.827858	2.39909	-5.36051	2.20365e-05	0.000514434	2.77318
ENSMUSG00000049988	0.894861	5.33474	5.35824	2.21565e-05	0.000516476	2.39049
ENSMUSG00000049606	-0.391912	5.3984	-5.35505	2.23266e-05	0.000519675	2.37361
ENSMUSG00000015757	-0.384973	6.24904	-5.35229	2.24749e-05	0.000521892	2.36143
ENSMUSG00000035234	-0.698439	3.33278	-5.35205	2.24877e-05	0.000521892	2.57539
ENSMUSG00000035798	-0.492973	5.24136	-5.3451	2.28656e-05	0.000529887	2.35839
ENSMUSG00000071652	0.482058	4.63602	5.34366	2.29446e-05	0.000530941	2.42802
ENSMUSG00000097536	-1.01585	2.3155	-5.34086	2.30992e-05	0.000533739	2.6973
ENSMUSG00000024299	-0.438365	6.35752	-5.33948	2.31758e-05	0.000534085	2.33286
ENSMUSG00000046598	-1.09757	2.53187	-5.33937	2.31815e-05	0.000534085	2.70584
ENSMUSG00000042106	1.30024	1.59563	5.33741	2.32912e-05	0.000535833	2.77173
ENSMUSG00000057375	0.406714	4.84527	5.33466	2.34451e-05	0.000538592	2.35779
ENSMUSG00000032525	-0.49506	7.45155	-5.33247	2.35687e-05	0.000540648	2.36718
ENSMUSG00000037095	2.38035	5.48695	5.32656	2.39053e-05	0.000547577	2.3444
ENSMUSG00000076674	-1.51733	0.931228	-5.32111	2.42196e-05	0.000553975	2.73632
ENSMUSG00000092569	-1.78882	-1.02715	-5.31739	2.44366e-05	0.000556927	2.20309
ENSMUSG00000099250	-2.81647	3.36918	-5.31696	2.44619e-05	0.000556927	2.53195
ENSMUSG00000099021	-2.81647	3.36918	-5.31696	2.44619e-05	0.000556927	2.53195
ENSMUSG00000097577	-1.013	1.04961	-5.31636	2.44974e-05	0.000556927	2.72241
ENSMUSG00000040703	-1.02584	3.05339	-5.31577	2.45319e-05	0.000556927	2.41447
ENSMUSG00000067220	-1.65052	1.03303	-5.31525	2.45627e-05	0.000556927	2.70492
ENSMUSG00000096952	-0.901197	1.73423	-5.31423	2.46231e-05	0.000556927	2.71337
ENSMUSG00000028367	0.736461	6.14047	5.31411	2.46297e-05	0.000556927	2.27188
ENSMUSG00000064137	-1.76101	1.41342	-5.313	2.46956e-05	0.000557622	2.67349
ENSMUSG00000090272	-0.757776	4.96518	-5.31041	2.48496e-05	0.000560301	2.60644
ENSMUSG00000097277	-0.821669	2.097	-5.30516	2.5165e-05	0.000566606	2.65685
ENSMUSG00000008393	0.855275	6.01485	5.30347	2.52674e-05	0.000568104	2.24634
ENSMUSG00000032637	-0.420441	8.07636	-5.30223	2.53426e-05	0.000568568	2.33202
ENSMUSG00000020024	0.508232	4.57232	5.30195	2.53598e-05	0.000568568	2.28853
ENSMUSG00000042265	1.4643	5.42071	5.30084	2.54271e-05	0.000568958	2.2847
ENSMUSG00000023990	0.45061	5.79611	5.30035	2.54572e-05	0.000568958	2.23354
ENSMUSG00000071369	0.432313	6.90476	5.29982	2.54896e-05	0.000568958	2.26654
ENSMUSG00000016150	-1.70757	-0.611234	-5.29931	2.55207e-05	0.000568958	2.42683
ENSMUSG00000073788	1.37774	0.991862	5.2985	2.55702e-05	0.000569261	2.68615
ENSMUSG00000030403	0.355995	8.01343	5.29687	2.56707e-05	0.000570697	2.3143
ENSMUSG00000021893	-0.424471	6.20438	-5.29611	2.57176e-05	0.000570939	2.22364
ENSMUSG00000009633	1.1827	3.06649	5.29448	2.58184e-05	0.000572373	2.5627
ENSMUSG00000064262	-0.888578	7.85355	-5.29254	2.59394e-05	0.000574253	2.29415
ENSMUSG00000022965	0.537687	6.5003	5.29095	2.60382e-05	0.000575636	2.21997
ENSMUSG00000026502	-0.406983	4.72763	-5.2819	2.6611e-05	0.000587433	2.26094
ENSMUSG00000064354	-0.870297	11.0848	-5.28135	2.66459e-05	0.000587433	2.47675
ENSMUSG00000028890	0.412216	5.13601	5.2798	2.67452e-05	0.000588803	2.21696
ENSMUSG00000027245	-0.570613	3.69133	-5.27667	2.69474e-05	0.000591164	2.3425
ENSMUSG00000042073	1.22314	1.70234	5.27656	2.69543e-05	0.000591164	2.63191
ENSMUSG00000021798	2.16134	-1.62443	5.27641	2.69643e-05	0.000591164	2.28779
ENSMUSG00000057649	-0.409497	5.34336	-5.27571	2.70095e-05	0.000591337	2.18475
ENSMUSG00000014349	0.333781	6.22547	5.27178	2.72658e-05	0.000595535	2.16498
ENSMUSG00000034083	-0.428268	4.52638	-5.27162	2.72764e-05	0.000595535	2.23987
ENSMUSG00000067942	-0.492104	4.58332	-5.27093	2.73214e-05	0.000595696	2.23293
ENSMUSG00000006273	0.458136	7.30064	5.26805	2.75112e-05	0.000599012	2.20488
ENSMUSG00000002458	0.307575	6.45038	5.26612	2.76392e-05	0.000600195	2.15978
ENSMUSG00000050428	0.520948	4.15361	5.26609	2.76413e-05	0.000600195	2.30176
ENSMUSG00000017485	-0.667992	7.81337	-5.26524	2.76976e-05	0.000600594	2.2207
ENSMUSG00000024498	-0.541643	5.82552	-5.263	2.78474e-05	0.000603001	2.14241
ENSMUSG00000029208	-0.679787	4.28405	-5.26205	2.79113e-05	0.000603001	2.24058
ENSMUSG00000083563	-0.770463	3.85466	-5.26188	2.79227e-05	0.000603001	2.26693
ENSMUSG00000024232	1.95803	0.219713	5.2607	2.80016e-05	0.000603883	2.41341
ENSMUSG00000095362	-0.898829	2.37151	-5.25749	2.82186e-05	0.000607736	2.54183
ENSMUSG00000097217	-1.16307	0.134138	-5.25438	2.84303e-05	0.000611464	2.47331
ENSMUSG00000042724	0.55079	5.45384	5.24873	2.88199e-05	0.000618384	2.12669
ENSMUSG00000075705	0.76469	8.20935	5.24858	2.88301e-05	0.000618384	2.23425
ENSMUSG00000014353	-0.377758	4.88597	-5.24641	2.89809e-05	0.000620778	2.14956
ENSMUSG00000008348	0.548136	9.38105	5.24572	2.90289e-05	0.000620968	2.27125
ENSMUSG00000057181	-0.613827	3.92969	-5.2445	2.91144e-05	0.000621957	2.25681
ENSMUSG00000021816	-0.488258	6.06421	-5.24314	2.92095e-05	0.00062315	2.0955
ENSMUSG00000057229	-0.595218	5.79342	-5.24248	2.9256e-05	0.000623295	2.09634
ENSMUSG00000024384	-0.537998	6.2445	-5.24193	2.9295e-05	0.000623295	2.0965
ENSMUSG00000046062	0.294447	7.79502	5.23962	2.94583e-05	0.000625351	2.16132
ENSMUSG00000041763	-0.349755	6.29165	-5.23944	2.94705e-05	0.000625351	2.08956
ENSMUSG00000026791	0.659071	2.11071	5.23749	2.96094e-05	0.000627458	2.52659
ENSMUSG00000033632	-0.45414	3.64794	-5.23331	2.99087e-05	0.000632955	2.28233
ENSMUSG00000071267	-0.777465	4.25131	-5.22982	3.0161e-05	0.000637442	2.17097
ENSMUSG00000022696	-1.12121	6.04171	-5.22895	3.02243e-05	0.000637501	2.07058
ENSMUSG00000028266	0.610756	5.51562	5.22865	3.02462e-05	0.000637501	2.06478
ENSMUSG00000020156	-0.594982	5.67231	-5.22812	3.02844e-05	0.000637501	2.0617
ENSMUSG00000040441	2.30289	-0.614123	5.22675	3.03846e-05	0.000638762	1.95124
ENSMUSG00000025086	-0.84206	3.31412	-5.22588	3.04485e-05	0.000639257	2.3569
ENSMUSG00000071748	-0.56945	4.53683	-5.22467	3.05371e-05	0.000640269	2.11893
ENSMUSG00000050592	-0.803805	6.73636	-5.22157	3.07658e-05	0.000644212	2.06235
ENSMUSG00000026548	1.56077	2.4316	5.2206	3.0838e-05	0.000644872	2.40008
ENSMUSG00000026864	0.434582	8.03932	5.21994	3.08869e-05	0.000645044	2.13014
ENSMUSG00000006360	0.868906	6.43198	5.21792	3.10377e-05	0.000647339	2.04839
ENSMUSG00000039556	-0.799509	3.12154	-5.21658	3.11375e-05	0.000648569	2.3014
ENSMUSG00000047293	1.38486	1.70239	5.21503	3.12545e-05	0.000649702	2.48897
ENSMUSG00000028330	-0.403255	5.57733	-5.21477	3.12739e-05	0.000649702	2.02941
ENSMUSG00000035851	-0.623381	7.29504	-5.21234	3.14577e-05	0.000652665	2.07127
ENSMUSG00000097731	-3.31913	-2.06099	-5.21175	3.15021e-05	0.000652731	1.58284
ENSMUSG00000025937	-0.438239	3.87292	-5.21005	3.16314e-05	0.000654555	2.15803
ENSMUSG00000036281	-0.517038	5.21531	-5.20169	3.2275e-05	0.000666996	2.01858
ENSMUSG00000042625	-0.440091	7.42971	-5.20115	3.23168e-05	0.000666996	2.04818
ENSMUSG00000024472	-0.370832	6.00107	-5.19654	3.26773e-05	0.000673098	1.98206
ENSMUSG00000040940	-0.670342	9.71955	-5.19629	3.26973e-05	0.000673098	2.1943
ENSMUSG00000035901	0.553055	7.70139	5.19563	3.27492e-05	0.00067329	2.06254
ENSMUSG00000049109	-1.24127	5.06061	-5.19286	3.29685e-05	0.000676923	2.02049
ENSMUSG00000068463	-1.24204	0.88409	-5.19086	3.31277e-05	0.000679311	2.43936
ENSMUSG00000042579	-0.910863	2.41196	-5.18534	3.35716e-05	0.000687523	2.34645
ENSMUSG00000095909	-1.52092	-0.898061	-5.18288	3.37709e-05	0.000690713	2.1268
ENSMUSG00000078780	1.1707	5.10484	5.18011	3.39974e-05	0.000694387	1.96298
ENSMUSG00000076490	-0.976095	5.09606	-5.17961	3.40382e-05	0.000694387	1.96417
ENSMUSG00000008763	-0.303205	6.10116	-5.17716	3.42397e-05	0.000697455	1.93499
ENSMUSG00000029179	-0.447521	3.80538	-5.17658	3.42878e-05	0.000697455	2.12512
ENSMUSG00000079457	1.04726	3.8598	5.17568	3.43623e-05	0.000697455	2.036
ENSMUSG00000058979	-0.546086	4.88996	-5.17565	3.43645e-05	0.000697455	1.97328
ENSMUSG00000016940	-0.471862	4.82291	-5.17466	3.44468e-05	0.000698231	1.97835
ENSMUSG00000003778	-0.429613	6.36854	-5.17247	3.46296e-05	0.00070104	1.93104
ENSMUSG00000005682	-0.416409	6.0517	-5.17179	3.46862e-05	0.000701289	1.92221
ENSMUSG00000082588	-0.848172	2.78786	-5.16881	3.4936e-05	0.000704763	2.23685
ENSMUSG00000097026	-1.08333	2.03861	-5.16869	3.49469e-05	0.000704763	2.36738
ENSMUSG00000070501	-0.982064	4.68164	-5.16767	3.50329e-05	0.000705599	1.99386
ENSMUSG00000044340	0.415196	4.32178	5.16554	3.52132e-05	0.000708331	2.03681
ENSMUSG00000020647	0.3932	6.56214	5.16153	3.55555e-05	0.000714003	1.91523
ENSMUSG00000028010	-0.698246	3.17046	-5.16118	3.55853e-05	0.000714003	2.19617
ENSMUSG00000025159	-0.468739	5.9772	-5.15917	3.57579e-05	0.00071656	1.89238
ENSMUSG00000005687	-0.362868	5.16322	-5.15802	3.58577e-05	0.000717652	1.91158
ENSMUSG00000028411	-0.427814	3.68643	-5.15722	3.59268e-05	0.000718128	2.08763
ENSMUSG00000031153	-0.363015	6.65419	-5.15226	3.63596e-05	0.000724802	1.89421
ENSMUSG00000073491	-1.36425	3.89841	-5.15188	3.63921e-05	0.000724802	2.31749
ENSMUSG00000072763	-0.778213	3.47469	-5.15182	3.63978e-05	0.000724802	2.09345
ENSMUSG00000036918	0.353112	7.88115	5.15036	3.65258e-05	0.000726437	1.96183
ENSMUSG00000038535	-0.70753	4.92736	-5.14952	3.66e-05	0.000727	1.92198
ENSMUSG00000074419	0.686615	4.47281	5.14878	3.66654e-05	0.000727388	1.88704
ENSMUSG00000043091	0.740203	5.22198	5.1481	3.67255e-05	0.00072767	1.90889
ENSMUSG00000000982	1.5094	2.2353	5.1452	3.69834e-05	0.000731864	2.3197
ENSMUSG00000022228	-0.3995	6.29904	-5.14313	3.71689e-05	0.000734618	1.8618
ENSMUSG00000026407	2.65126	0.477628	5.13949	3.74972e-05	0.000739754	2.30411
ENSMUSG00000041801	1.51574	2.89129	5.13873	3.75654e-05	0.000739754	2.14145
ENSMUSG00000037526	-0.471983	3.87181	-5.138	3.76318e-05	0.000739754	1.97523
ENSMUSG00000044103	1.40346	5.57527	5.13768	3.76614e-05	0.000739754	1.86384
ENSMUSG00000079426	0.373772	6.75389	5.13742	3.76852e-05	0.000739754	1.8616
ENSMUSG00000029836	-0.552816	5.93794	-5.13716	3.77087e-05	0.000739754	1.83957
ENSMUSG00000027706	-0.353867	6.57578	-5.13567	3.78441e-05	0.000740808	1.84902
ENSMUSG00000023150	-0.661987	7.72476	-5.13554	3.78559e-05	0.000740808	1.90287
ENSMUSG00000000120	1.60626	2.45969	5.13302	3.80868e-05	0.000743994	2.2841
ENSMUSG00000019996	-0.99447	3.70386	-5.13274	3.81126e-05	0.000743994	2.0503
ENSMUSG00000025001	-0.717986	3.23671	-5.13099	3.82738e-05	0.000746221	2.07772
ENSMUSG00000038766	-0.532091	7.9129	-5.12892	3.84657e-05	0.000749041	1.90409
ENSMUSG00000028809	-0.415938	7.38969	-5.12802	3.85497e-05	0.000749424	1.87261
ENSMUSG00000052310	0.438074	5.56726	5.12769	3.85799e-05	0.000749424	1.82221
ENSMUSG00000074829	-0.763785	3.56835	-5.12657	3.86848e-05	0.00074983	2.01195
ENSMUSG00000026012	-1.02807	5.94466	-5.12646	3.86954e-05	0.00074983	1.82049
ENSMUSG00000063524	0.495944	7.54851	5.12533	3.88008e-05	0.000750381	1.83648
ENSMUSG00000089917	-0.309056	5.40489	-5.12514	3.88185e-05	0.000750381	1.81937
ENSMUSG00000056643	1.59456	0.00694195	5.12401	3.8925e-05	0.00075143	2.1752
ENSMUSG00000021519	-0.412129	4.92499	-5.12355	3.89676e-05	0.00075143	1.835
ENSMUSG00000072568	-0.586868	4.51075	-5.12185	3.91282e-05	0.00075361	1.90088
ENSMUSG00000073412	0.651543	5.28112	5.12084	3.92237e-05	0.000754532	1.80485
ENSMUSG00000033826	-0.798265	5.86073	-5.1194	3.93606e-05	0.000756248	1.8091
ENSMUSG00000039740	-0.463934	4.27686	-5.11555	3.97277e-05	0.000762377	1.89687
ENSMUSG00000049130	1.22666	6.07068	5.11199	4.00716e-05	0.000768046	1.79204
ENSMUSG00000021366	0.366981	6.50903	5.1107	4.01959e-05	0.00076882	1.78144
ENSMUSG00000067599	-1.00448	4.14778	-5.11057	4.02089e-05	0.00076882	1.82798
ENSMUSG00000025579	0.354911	5.00756	5.10967	4.02963e-05	0.000769562	1.80437
ENSMUSG00000029245	-1.53004	0.91464	-5.10868	4.03923e-05	0.000770405	2.25696
ENSMUSG00000064341	-0.97045	10.2942	-5.10822	4.04376e-05	0.000770405	2.0209
ENSMUSG00000029869	-1.06	2.51097	-5.1074	4.05176e-05	0.000771003	2.10632
ENSMUSG00000002111	0.602555	7.60154	5.10586	4.06691e-05	0.000772957	1.84234
ENSMUSG00000046442	-0.735554	2.41771	-5.10208	4.10424e-05	0.000779117	2.15729
ENSMUSG00000023004	0.408943	7.37414	5.09908	4.13408e-05	0.000783843	1.79447
ENSMUSG00000003380	0.558304	6.22761	5.09855	4.13931e-05	0.000783897	1.74879
ENSMUSG00000066037	-0.568815	6.4782	-5.09607	4.16422e-05	0.000787674	1.75392
ENSMUSG00000030178	-1.17961	3.85507	-5.09193	4.2061e-05	0.000794647	1.85478
ENSMUSG00000046223	0.574358	5.87669	5.08656	4.26102e-05	0.000804065	1.71949
ENSMUSG00000027751	-0.491684	5.93106	-5.0851	4.27606e-05	0.000805004	1.71355
ENSMUSG00000059897	-0.7552	2.65886	-5.0851	4.27615e-05	0.000805004	2.0934
ENSMUSG00000021200	1.85857	-1.21262	5.08162	4.31228e-05	0.000810179	1.66181
ENSMUSG00000060441	-0.511015	5.82411	-5.08146	4.31387e-05	0.000810179	1.70496
ENSMUSG00000024670	-0.939077	5.83963	-5.0798	4.33123e-05	0.000812477	1.70621
ENSMUSG00000025058	0.522833	4.53678	5.07881	4.34163e-05	0.000813052	1.79876
ENSMUSG00000032267	-0.802626	5.31188	-5.07853	4.34455e-05	0.000813052	1.71127
ENSMUSG00000058446	-0.529591	7.33072	-5.07432	4.38897e-05	0.000820395	1.74556
ENSMUSG00000053289	-0.510404	5.06289	-5.07342	4.39854e-05	0.000821217	1.71435
ENSMUSG00000079845	-0.968817	3.13679	-5.06801	4.45651e-05	0.00083106	1.95472
ENSMUSG00000029422	-0.465029	6.56967	-5.0628	4.51295e-05	0.000840597	1.67302
ENSMUSG00000087138	-0.931393	1.46431	-5.0604	4.53926e-05	0.000844505	2.14335
ENSMUSG00000058670	-2.84786	-1.90349	-5.05917	4.55285e-05	0.000846039	1.58343
ENSMUSG00000046434	-0.781485	7.94655	-5.05666	4.58056e-05	0.000850193	1.73665
ENSMUSG00000034254	0.34268	5.54333	5.055	4.59897e-05	0.000852464	1.65305
ENSMUSG00000064030	-0.607492	4.66317	-5.05399	4.61018e-05	0.000852464	1.71594
ENSMUSG00000024387	0.319613	5.71216	5.05361	4.61446e-05	0.000852464	1.6394
ENSMUSG00000078919	-0.47355	4.11261	-5.05314	4.61968e-05	0.000852464	1.76189
ENSMUSG00000039485	-0.686764	3.30814	-5.05314	4.61969e-05	0.000852464	1.90147
ENSMUSG00000046753	-0.559297	3.40642	-5.05002	4.65472e-05	0.00085793	1.87702
ENSMUSG00000059588	-0.554169	4.74618	-5.04896	4.66668e-05	0.000859136	1.67199
ENSMUSG00000043962	-0.572232	8.01159	-5.04839	4.67306e-05	0.000859312	1.72154
ENSMUSG00000095832	-0.505885	5.56064	-5.04694	4.68948e-05	0.000860808	1.62443
ENSMUSG00000023903	1.3348	4.10141	5.04672	4.69206e-05	0.000860808	1.74198
ENSMUSG00000098428	2.6778	1.98585	5.04576	4.70297e-05	0.000861812	2.11887
ENSMUSG00000063232	3.34951	-2.56005	5.04428	4.71979e-05	0.000863897	1.19421
ENSMUSG00000057058	-0.885108	5.43694	-5.04309	4.73341e-05	0.000865389	1.6208
ENSMUSG00000027201	-0.594654	4.68901	-5.04003	4.76864e-05	0.000870535	1.65696
ENSMUSG00000029203	-0.396428	4.96808	-5.03944	4.77537e-05	0.000870535	1.63758
ENSMUSG00000029068	-0.513439	8.08737	-5.03905	4.77991e-05	0.000870535	1.71784
ENSMUSG00000028608	-0.439455	4.52176	-5.03825	4.78917e-05	0.000870535	1.67156
ENSMUSG00000000409	-0.888101	7.23233	-5.03754	4.79744e-05	0.000870535	1.66025
ENSMUSG00000020280	-0.449888	3.85962	-5.03737	4.79942e-05	0.000870535	1.76999
ENSMUSG00000014195	-0.551404	7.69499	-5.03732	4.8e-05	0.000870535	1.67347
ENSMUSG00000029415	-0.337662	5.66285	-5.03617	4.81333e-05	0.000871956	1.59689
ENSMUSG00000031174	-0.774462	2.05225	-5.03418	4.83663e-05	0.000875177	2.05401
ENSMUSG00000031985	-0.373005	5.87695	-5.03278	4.85303e-05	0.000875912	1.58671
ENSMUSG00000051154	-0.482788	4.48185	-5.03242	4.85721e-05	0.000875912	1.6715
ENSMUSG00000028521	-0.545254	3.24898	-5.03234	4.85817e-05	0.000875912	1.877
ENSMUSG00000021377	-0.465685	6.8632	-5.03195	4.8628e-05	0.000875912	1.61507
ENSMUSG00000062604	-0.591871	6.05197	-5.02561	4.93795e-05	0.000888438	1.57131
ENSMUSG00000037339	-0.408188	4.94063	-5.02327	4.9661e-05	0.00089249	1.60464
ENSMUSG00000024975	-0.606147	7.3546	-5.02077	4.99616e-05	0.000896875	1.61866
ENSMUSG00000041966	-0.446183	4.88984	-5.01969	5.00934e-05	0.000898225	1.59469
ENSMUSG00000015247	0.411701	4.52597	5.01806	5.02909e-05	0.000900746	1.62719
ENSMUSG00000068923	0.756735	5.07785	5.01222	5.10069e-05	0.00091254	1.5669
ENSMUSG00000024737	0.83089	5.55665	5.00755	5.15869e-05	0.000921875	1.53535
ENSMUSG00000044496	0.417411	5.9634	5.00481	5.19315e-05	0.000926123	1.52021
ENSMUSG00000032412	-0.642376	7.98645	-5.00473	5.19414e-05	0.000926123	1.63071
ENSMUSG00000069743	-1.76971	-0.949627	-5.0027	5.2197e-05	0.000929635	1.73868
ENSMUSG00000003283	0.74423	7.3149	5.00116	5.2392e-05	0.000931438	1.58065
ENSMUSG00000085651	-1.88292	-1.97529	-5.00052	5.24736e-05	0.000931438	1.3721
ENSMUSG00000001472	-0.341263	7.80788	-5.00015	5.25204e-05	0.000931438	1.58695
ENSMUSG00000002668	-0.347741	6.87921	-4.99988	5.25549e-05	0.000931438	1.54135
ENSMUSG00000037706	0.575354	5.85889	4.99959	5.25921e-05	0.000931438	1.51989
ENSMUSG00000021666	-0.423966	5.00139	-4.99901	5.26662e-05	0.00093171	1.54324
ENSMUSG00000040721	-0.616597	4.85077	-4.9981	5.27821e-05	0.000932719	1.53689
ENSMUSG00000074127	-1.39527	-1.19715	-4.99426	5.32748e-05	0.000940246	1.65907
ENSMUSG00000022000	-0.365343	6.42478	-4.99386	5.33267e-05	0.000940246	1.50617
ENSMUSG00000038119	-0.99767	2.92263	-4.98928	5.39227e-05	0.000949661	1.90496
ENSMUSG00000021701	1.44475	2.60054	4.98883	5.39805e-05	0.000949661	1.9515
ENSMUSG00000001833	-0.443327	6.8512	-4.98812	5.40744e-05	0.000950259	1.51004
ENSMUSG00000075270	-1.47426	-0.233459	-4.98405	5.46097e-05	0.000958603	1.8512
ENSMUSG00000085566	-0.5789	3.40888	-4.98298	5.47514e-05	0.000960026	1.71948
ENSMUSG00000026576	-0.843295	5.09076	-4.98091	5.50267e-05	0.000963788	1.47734
ENSMUSG00000079614	-0.382646	5.31853	-4.98019	5.51229e-05	0.000964408	1.47462
ENSMUSG00000069237	-0.593698	5.01026	-4.97941	5.52281e-05	0.000965183	1.48574
ENSMUSG00000076680	-2.09702	2.41771	-4.9789	5.52961e-05	0.000965307	1.82998
ENSMUSG00000040659	0.574357	6.89049	4.97735	5.55039e-05	0.000967869	1.49436
ENSMUSG00000039496	-1.46961	-0.313127	-4.97615	5.56653e-05	0.000968717	1.79896
ENSMUSG00000020705	-0.443638	6.51703	-4.97608	5.56748e-05	0.000968717	1.46311
ENSMUSG00000024042	0.95634	6.71414	4.97511	5.58069e-05	0.000969951	1.46486
ENSMUSG00000096054	1.69894	1.64181	4.9742	5.59291e-05	0.00097101	1.95332
ENSMUSG00000063894	-0.811988	4.5305	-4.97131	5.6323e-05	0.000976779	1.50179
ENSMUSG00000028062	-0.426728	4.51735	-4.96771	5.68168e-05	0.000984265	1.50646
ENSMUSG00000038780	-0.417692	5.36211	-4.96617	5.70286e-05	0.000986848	1.43369
ENSMUSG00000034544	-0.44768	4.20742	-4.96573	5.70904e-05	0.000986848	1.54333
ENSMUSG00000050088	-0.349743	4.92471	-4.9641	5.73167e-05	0.000989681	1.45303
ENSMUSG00000035726	-0.483221	6.66921	-4.95037	5.9257e-05	0.00102207	1.40762
ENSMUSG00000050310	-0.536415	6.51036	-4.94805	5.95907e-05	0.00102618	1.39403
ENSMUSG00000045078	0.391626	6.10441	4.94782	5.9625e-05	0.00102618	1.38234
ENSMUSG00000016181	-0.500399	4.34571	-4.94717	5.97187e-05	0.00102668	1.50181
ENSMUSG00000055872	-1.80497	-0.612535	-4.94589	5.99038e-05	0.00102875	1.74485
ENSMUSG00000057706	-0.804451	3.23588	-4.94505	6.00264e-05	0.00102877	1.68281
ENSMUSG00000092418	2.47167	-1.99139	4.94499	6.00346e-05	0.00102877	1.11545
ENSMUSG00000039835	-1.78245	-0.202905	-4.94425	6.01432e-05	0.00102951	1.81118
ENSMUSG00000050908	-0.998715	1.6637	-4.94037	6.07123e-05	0.00103813	1.85813
ENSMUSG00000030681	0.608879	5.98223	4.93452	6.15797e-05	0.00105183	1.35292
ENSMUSG00000028673	0.386841	6.29199	4.93328	6.17646e-05	0.00105385	1.35554
ENSMUSG00000042203	-0.473832	5.15107	-4.93186	6.19784e-05	0.00105637	1.36245
ENSMUSG00000031311	-0.382959	7.37178	-4.9299	6.22735e-05	0.00106026	1.38885
ENSMUSG00000027185	-0.460619	5.1066	-4.9276	6.26229e-05	0.00106506	1.36044
ENSMUSG00000022386	-0.632513	3.14263	-4.92503	6.30149e-05	0.00106997	1.64083
ENSMUSG00000024991	-0.57019	8.25625	-4.92482	6.30468e-05	0.00106997	1.44292
ENSMUSG00000028060	-0.372045	6.17264	-4.92426	6.31326e-05	0.00107028	1.32654
ENSMUSG00000029389	-0.466414	4.6619	-4.92325	6.3287e-05	0.00107175	1.39897
ENSMUSG00000022564	0.928754	8.20841	4.92244	6.34114e-05	0.00107271	1.44161
ENSMUSG00000038696	0.335021	5.29494	4.92199	6.34814e-05	0.00107275	1.33848
ENSMUSG00000020823	0.716602	6.76899	4.9205	6.37103e-05	0.0010734	1.34434
ENSMUSG00000035027	0.412464	5.94316	4.92001	6.37874e-05	0.0010734	1.31533
ENSMUSG00000026083	-0.452899	6.95174	-4.9199	6.3804e-05	0.0010734	1.35049
ENSMUSG00000039219	-0.513421	6.97903	-4.91968	6.38378e-05	0.0010734	1.34611
ENSMUSG00000021302	-0.386276	4.61649	-4.91928	6.39007e-05	0.0010734	1.40973
ENSMUSG00000033972	-0.64928	3.83375	-4.91911	6.39261e-05	0.0010734	1.50178
ENSMUSG00000011148	0.557085	4.9008	4.91795	6.41074e-05	0.00107531	1.38362
ENSMUSG00000029290	-0.606875	3.98819	-4.91573	6.44538e-05	0.00107998	1.46654
ENSMUSG00000039976	-0.720542	2.2124	-4.91452	6.46423e-05	0.00108131	1.72374
ENSMUSG00000097899	2.44387	-1.57662	4.91435	6.46697e-05	0.00108131	1.25928
ENSMUSG00000071796	-0.631431	5.52873	-4.90949	6.54366e-05	0.00109298	1.29357
ENSMUSG00000035107	-0.775123	2.855	-4.90846	6.56015e-05	0.00109458	1.58917
ENSMUSG00000079852	-0.935647	3.98668	-4.90162	6.66995e-05	0.00111173	1.33882
ENSMUSG00000085037	-0.457161	2.87672	-4.90025	6.69218e-05	0.0011138	1.58358
ENSMUSG00000007036	0.301768	5.12181	4.89999	6.69644e-05	0.0011138	1.29216
ENSMUSG00000017478	-0.328776	6.2791	-4.89886	6.71479e-05	0.00111568	1.26689
ENSMUSG00000008384	0.70752	4.02964	4.89768	6.73406e-05	0.00111771	1.44668
ENSMUSG00000089810	-0.347329	2.98873	-4.89718	6.74232e-05	0.00111791	1.59343
ENSMUSG00000086502	-0.723349	2.17219	-4.89523	6.77431e-05	0.00112204	1.69991
ENSMUSG00000039208	0.782202	5.26025	4.89223	6.82371e-05	0.00112746	1.2694
ENSMUSG00000054099	-0.619977	2.85938	-4.89174	6.8319e-05	0.00112746	1.56663
ENSMUSG00000050357	-0.732012	5.92458	-4.89129	6.83944e-05	0.00112746	1.24784
ENSMUSG00000074182	-0.717759	3.06813	-4.89127	6.83965e-05	0.00112746	1.53441
ENSMUSG00000002625	-0.465175	6.16942	-4.89088	6.84622e-05	0.00112746	1.24565
ENSMUSG00000022635	-0.371861	4.27676	-4.89058	6.85124e-05	0.00112746	1.36217
ENSMUSG00000054414	-0.381746	5.5322	-4.88983	6.86367e-05	0.00112746	1.24284
ENSMUSG00000022774	-0.528326	4.39104	-4.88982	6.86392e-05	0.00112746	1.34429
ENSMUSG00000012483	-0.588553	2.8684	-4.88644	6.92038e-05	0.00113556	1.58831
ENSMUSG00000092627	3.2118	-1.14573	4.88126	7.00806e-05	0.00114799	1.13552
ENSMUSG00000021661	-0.355896	4.50852	-4.88111	7.01061e-05	0.00114799	1.29183
ENSMUSG00000021819	-0.384188	6.56537	-4.87907	7.04549e-05	0.00115251	1.22567
ENSMUSG00000030780	-0.511061	3.91248	-4.8757	7.10338e-05	0.00116078	1.36989
ENSMUSG00000052707	-0.435808	7.61736	-4.87324	7.14604e-05	0.00116639	1.27397
ENSMUSG00000054770	-0.543228	4.40134	-4.87287	7.15243e-05	0.00116639	1.29513
ENSMUSG00000003123	0.42057	5.24965	4.87099	7.18519e-05	0.00116909	1.21198
ENSMUSG00000060771	-0.452268	3.51008	-4.87067	7.19077e-05	0.00116909	1.38311
ENSMUSG00000001017	-0.508306	6.96933	-4.87065	7.1911e-05	0.00116909	1.22735
ENSMUSG00000034110	0.664355	1.9263	4.86925	7.21551e-05	0.00117186	1.66845
ENSMUSG00000048251	-1.20792	5.98128	-4.86746	7.2471e-05	0.00117578	1.19794
ENSMUSG00000045193	-0.725574	6.0758	-4.86697	7.25559e-05	0.00117596	1.19108
ENSMUSG00000029406	-0.646832	6.07626	-4.86597	7.27336e-05	0.00117763	1.18625
ENSMUSG00000090069	1.3344	2.23253	4.86378	7.31217e-05	0.00118163	1.67895
ENSMUSG00000044026	-1.14766	2.66802	-4.86373	7.313e-05	0.00118163	1.54222
ENSMUSG00000032328	-0.405617	6.86857	-4.85739	7.42661e-05	0.00119877	1.19424
ENSMUSG00000032249	-0.388697	7.50907	-4.85623	7.44749e-05	0.00120092	1.22549
ENSMUSG00000028577	-0.263639	5.68543	-4.8549	7.47177e-05	0.00120245	1.15751
ENSMUSG00000029920	-0.439782	4.62723	-4.85487	7.47216e-05	0.00120245	1.22378
ENSMUSG00000030283	-1.36467	4.11477	-4.85207	7.52333e-05	0.00120945	1.3196
ENSMUSG00000039115	-2.05617	-1.3006	-4.84971	7.56662e-05	0.00121518	1.23573
ENSMUSG00000044966	-0.876669	0.986883	-4.84747	7.60783e-05	0.00122056	1.67292
ENSMUSG00000008999	0.963651	1.04262	4.84609	7.6335e-05	0.00122261	1.6416
ENSMUSG00000059423	-0.48298	3.43604	-4.84595	7.636e-05	0.00122261	1.36311
ENSMUSG00000058260	-0.806992	2.79427	-4.84414	7.66964e-05	0.00122675	1.4274
ENSMUSG00000020664	-0.319966	5.46942	-4.8436	7.67974e-05	0.00122713	1.13554
ENSMUSG00000034659	0.456391	4.9571	4.84158	7.71755e-05	0.00123193	1.16988
ENSMUSG00000040272	-0.436431	3.55576	-4.84018	7.74383e-05	0.00123488	1.3585
ENSMUSG00000039148	-0.433436	6.5332	-4.83698	7.80449e-05	0.00124316	1.12412
ENSMUSG00000071172	-0.491785	7.63054	-4.83661	7.81139e-05	0.00124316	1.18194
ENSMUSG00000046056	-1.87995	-0.282451	-4.83314	7.87757e-05	0.00125243	1.24133
ENSMUSG00000022620	0.337493	4.63195	4.83128	7.91335e-05	0.00125686	1.17
ENSMUSG00000045268	-0.678276	2.66056	-4.83068	7.92498e-05	0.00125732	1.48436
ENSMUSG00000037509	-0.39691	3.27246	-4.82995	7.93892e-05	0.00125732	1.34378
ENSMUSG00000023267	-1.55271	0.739594	-4.82989	7.94007e-05	0.00125732	1.63375
ENSMUSG00000006736	0.522055	4.5373	4.82631	8.00948e-05	0.00126705	1.16783
ENSMUSG00000028484	-0.580352	6.32709	-4.82456	8.0437e-05	0.00127119	1.0943
ENSMUSG00000037904	1.19118	1.1447	4.81929	8.14754e-05	0.00128632	1.61007
ENSMUSG00000049044	-1.24009	4.26133	-4.81695	8.19408e-05	0.00129238	1.24236
ENSMUSG00000074417	0.893367	5.56827	4.81585	8.21587e-05	0.00129453	1.06978
ENSMUSG00000043795	-0.708477	5.08965	-4.81517	8.22949e-05	0.00129539	1.07484
ENSMUSG00000031362	-0.98048	2.69934	-4.81216	8.28999e-05	0.00130333	1.41193
ENSMUSG00000097136	1.79724	-0.535929	4.81185	8.29638e-05	0.00130333	1.44626
ENSMUSG00000030815	-0.294229	5.62688	-4.81046	8.32448e-05	0.00130569	1.05299
ENSMUSG00000004099	-0.474993	6.66436	-4.81029	8.32786e-05	0.00130569	1.06704
ENSMUSG00000038065	-0.885354	2.68278	-4.80975	8.3388e-05	0.00130611	1.42993
ENSMUSG00000031885	-0.490465	6.67239	-4.8086	8.36215e-05	0.00130847	1.06497
ENSMUSG00000072258	-0.549494	3.16874	-4.80776	8.37932e-05	0.00130987	1.32647
ENSMUSG00000035236	-0.623898	5.12469	-4.80586	8.41807e-05	0.00131463	1.0646
ENSMUSG00000018474	-0.694694	7.91515	-4.80362	8.46413e-05	0.00132052	1.12338
ENSMUSG00000097373	2.96886	-3.06229	4.80191	8.49942e-05	0.00132381	0.616409
ENSMUSG00000044952	0.670035	2.29036	4.80179	8.5019e-05	0.00132381	1.48955
ENSMUSG00000038872	0.958246	3.91083	4.80123	8.5134e-05	0.0013243	1.17871
ENSMUSG00000037935	-0.365467	6.18597	-4.80028	8.53318e-05	0.00132607	1.0261
ENSMUSG00000096719	2.62367	3.18163	4.79923	8.55501e-05	0.00132816	1.37386
ENSMUSG00000035596	0.605178	6.86303	4.79747	8.59184e-05	0.00133258	1.04584
ENSMUSG00000046982	-0.402403	4.99415	-4.79353	8.6745e-05	0.00134408	1.05634
ENSMUSG00000014867	0.297409	6.97296	4.79123	8.72329e-05	0.00134926	1.03503
ENSMUSG00000014543	1.19669	3.6654	4.79115	8.72493e-05	0.00134926	1.04876
ENSMUSG00000005148	1.36379	0.545668	4.79007	8.74777e-05	0.00135024	1.53033
ENSMUSG00000010047	0.72082	1.62364	4.79005	8.7483e-05	0.00135024	1.52885
ENSMUSG00000024856	0.586267	6.81719	4.78787	8.79489e-05	0.00135611	1.01684
ENSMUSG00000045775	-1.68568	1.21859	-4.78638	8.82687e-05	0.00135972	1.53505
ENSMUSG00000043065	-0.569107	4.49399	-4.78375	8.88354e-05	0.00136712	1.06183
ENSMUSG00000036661	0.610438	6.57522	4.78297	8.90033e-05	0.00136837	0.997614
ENSMUSG00000036745	2.20593	1.06682	4.78126	8.93739e-05	0.00137073	1.52368
ENSMUSG00000091014	-1.69968	0.538602	-4.7811	8.94088e-05	0.00137073	1.49346
ENSMUSG00000025500	-0.830518	1.72872	-4.78107	8.94161e-05	0.00137073	1.5065
ENSMUSG00000057551	-0.430558	4.35213	-4.78059	8.95212e-05	0.00137102	1.08287
ENSMUSG00000056054	1.43069	8.03466	4.77994	8.96625e-05	0.00137185	1.06298
ENSMUSG00000041096	-0.474212	4.83012	-4.77532	9.0677e-05	0.00138604	1.01585
ENSMUSG00000074867	-1.097	2.07518	-4.77377	9.10197e-05	0.00138994	1.42871
ENSMUSG00000063659	-0.456978	6.24255	-4.7715	9.15239e-05	0.00139629	0.956736
ENSMUSG00000026222	-0.425337	8.66766	-4.76914	9.20518e-05	0.00140299	1.09217
ENSMUSG00000034452	2.35745	-1.33239	4.76584	9.27932e-05	0.00141293	1.19107
ENSMUSG00000024420	1.76233	0.581035	4.76321	9.3389e-05	0.00142064	1.46816
ENSMUSG00000024793	-0.937066	3.01257	-4.76245	9.35628e-05	0.00142192	1.18407
ENSMUSG00000026098	-0.765879	2.61736	-4.76206	9.36525e-05	0.00142192	1.3716
ENSMUSG00000029859	1.18794	1.9988	4.76108	9.38747e-05	0.00142302	1.39765
ENSMUSG00000062931	-0.869808	2.2684	-4.76096	9.39043e-05	0.00142302	1.37811
ENSMUSG00000040663	-0.779457	6.68085	-4.75862	9.44388e-05	0.00142975	0.936739
ENSMUSG00000030203	0.743943	6.06286	4.75811	9.45564e-05	0.00143016	0.927736
ENSMUSG00000026632	-0.703909	2.31192	-4.75544	9.51735e-05	0.00143813	1.36805
ENSMUSG00000074698	-0.431847	6.95205	-4.75408	9.5489e-05	0.00144152	0.944322
ENSMUSG00000058388	-0.357633	4.56393	-4.75312	9.5714e-05	0.00144232	0.993583
ENSMUSG00000004931	0.368719	3.81201	4.75307	9.5724e-05	0.00144232	1.11948
ENSMUSG00000017493	-1.09369	6.0474	-4.75094	9.62229e-05	0.00144808	0.913338
ENSMUSG00000032355	-1.37379	-0.319985	-4.75043	9.6342e-05	0.00144808	1.34647
ENSMUSG00000031314	-0.495609	6.49554	-4.75027	9.63806e-05	0.00144808	0.918704
ENSMUSG00000086924	-2.0227	-1.71855	-4.74947	9.65687e-05	0.00144898	1.00883
ENSMUSG00000031242	-0.440584	4.53738	-4.74924	9.66228e-05	0.00144898	0.976454
ENSMUSG00000028703	0.342987	4.38363	4.74849	9.67988e-05	0.00145024	1.00972
ENSMUSG00000064367	-0.948951	10.6637	-4.7479	9.69384e-05	0.00145096	1.18477
ENSMUSG00000055833	-0.988465	0.137635	-4.74672	9.72171e-05	0.00145376	1.44132
ENSMUSG00000037007	-0.585337	3.85709	-4.74604	9.73775e-05	0.00145389	1.08199
ENSMUSG00000059183	-0.528355	3.96126	-4.74591	9.74094e-05	0.00145389	1.06945
ENSMUSG00000032407	-0.538684	6.19043	-4.74443	9.7761e-05	0.00145777	0.893782
ENSMUSG00000034832	-0.426839	6.90675	-4.74139	9.84881e-05	0.00146605	0.904121
ENSMUSG00000023020	0.509407	3.80087	4.74133	9.85015e-05	0.00146605	1.10232
ENSMUSG00000019777	-0.395675	5.06611	-4.73984	9.88594e-05	0.00147	0.90856
ENSMUSG00000043372	0.996332	1.70272	4.73942	9.89607e-05	0.00147013	1.33026
ENSMUSG00000026415	-0.960205	2.65042	-4.73875	9.91228e-05	0.00147116	1.18066
ENSMUSG00000037278	0.671948	1.88061	4.73729	9.94768e-05	0.00147503	1.37271
ENSMUSG00000092417	0.423131	4.31304	4.73671	9.96165e-05	0.00147572	1.01026
ENSMUSG00000055013	0.952936	4.2108	4.73564	9.98764e-05	0.0014774	0.93181
ENSMUSG00000036054	-0.413672	5.6179	-4.73517	9.99917e-05	0.0014774	0.871126
ENSMUSG00000039005	0.802033	4.75928	4.73509	0.00010001	0.0014774	0.924131
ENSMUSG00000020451	-0.499188	5.57113	-4.7342	0.000100227	0.00147924	0.87117
ENSMUSG00000035293	-0.566502	4.30446	-4.73365	0.000100361	0.00147984	0.966091
ENSMUSG00000078202	-0.765675	3.45795	-4.73116	0.000100972	0.00148723	1.0653
ENSMUSG00000074629	-0.969459	1.32239	-4.73084	0.00010105	0.00148723	1.40167
ENSMUSG00000005465	-0.784063	6.16282	-4.72927	0.00010144	0.00149158	0.85711
ENSMUSG00000098715	-0.835403	2.3411	-4.72746	0.000101887	0.00149496	1.30781
ENSMUSG00000097294	-1.53329	-0.199321	-4.72698	0.000102006	0.00149496	1.31051
ENSMUSG00000074024	-0.773468	2.04826	-4.72677	0.000102059	0.00149496	1.33629
ENSMUSG00000041598	0.638825	4.42327	4.72645	0.000102139	0.00149496	0.936758
ENSMUSG00000073374	-1.50501	1.20835	-4.72644	0.000102141	0.00149496	1.40194
ENSMUSG00000051166	-0.762598	4.54739	-4.72596	0.00010226	0.00149532	0.895912
ENSMUSG00000048379	-0.482061	6.23956	-4.72419	0.000102702	0.0015004	0.845067
ENSMUSG00000097015	-1.54142	-0.298677	-4.72155	0.000103365	0.00150861	1.31
ENSMUSG00000063439	0.568903	3.83993	4.72102	0.000103498	0.00150861	1.01609
ENSMUSG00000086335	-2.68521	-2.65844	-4.72082	0.00010355	0.00150861	0.665055
ENSMUSG00000028779	0.647294	4.96694	4.71989	0.000103783	0.00150959	0.885067
ENSMUSG00000031516	-0.344586	4.76907	-4.71949	0.000103884	0.00150959	0.876221
ENSMUSG00000036853	-0.687846	2.4476	-4.71942	0.000103902	0.00150959	1.16689
ENSMUSG00000043279	-0.384228	7.39844	-4.71871	0.000104083	0.00151082	0.8827
ENSMUSG00000014837	-0.692065	1.96145	-4.71497	0.000105035	0.00152298	1.32764
ENSMUSG00000063108	-0.540879	5.29483	-4.71467	0.000105114	0.00152298	0.830593
ENSMUSG00000044442	-0.581726	3.62371	-4.7143	0.000105209	0.00152298	1.00423
ENSMUSG00000095028	1.00867	6.15346	4.71335	0.000105451	0.0015251	0.828351
ENSMUSG00000004730	0.903377	5.9815	4.71277	0.000105602	0.00152579	0.820289
ENSMUSG00000090104	-0.711922	6.05814	-4.71207	0.00010578	0.00152579	0.813499
ENSMUSG00000060377	-0.750299	4.60235	-4.71204	0.000105788	0.00152579	0.88631
ENSMUSG00000066760	-0.359698	6.12698	-4.71109	0.000106033	0.00152794	0.811443
ENSMUSG00000025240	-0.322503	5.43672	-4.70645	0.00010724	0.00154393	0.802247
ENSMUSG00000080717	-0.710637	1.26813	-4.70459	0.000107728	0.00154885	1.34334
ENSMUSG00000035621	0.512954	7.34713	4.7044	0.000107778	0.00154885	0.850983
ENSMUSG00000087141	-0.935307	4.31081	-4.7025	0.000108276	0.00155368	0.906944
ENSMUSG00000025759	-0.354857	3.44165	-4.70238	0.00010831	0.00155368	1.033
ENSMUSG00000035671	0.599022	4.92332	4.7016	0.000108516	0.00155523	0.831804
ENSMUSG00000023927	-1.03431	7.39437	-4.70108	0.000108653	0.00155579	0.837449
ENSMUSG00000045176	0.533926	4.97697	4.69985	0.000108979	0.00155906	0.8173
ENSMUSG00000087672	-1.213	-0.0165632	-4.69503	0.000110267	0.00157606	1.2601
ENSMUSG00000033111	-0.624832	3.45624	-4.69339	0.000110709	0.00158095	0.991368
ENSMUSG00000038539	0.778172	3.79061	4.6924	0.000110976	0.00158334	0.912212
ENSMUSG00000071456	-0.938538	2.91934	-4.69179	0.000111141	0.00158426	1.10311
ENSMUSG00000027907	0.783483	7.79569	4.68928	0.000111824	0.00159257	0.842972
ENSMUSG00000039630	-0.514164	8.94821	-4.68866	0.000111994	0.00159355	0.923321
ENSMUSG00000026634	-0.308533	6.24415	-4.68674	0.000112518	0.00159957	0.753379
ENSMUSG00000003190	-0.486274	3.42377	-4.68603	0.000112713	0.00160091	1.01948
ENSMUSG00000073436	-0.478254	4.39842	-4.68545	0.000112873	0.00160174	0.904729
ENSMUSG00000057110	-0.470316	7.37505	-4.68481	0.000113048	0.00160279	0.806468
ENSMUSG00000094176	-0.992534	0.111738	-4.68189	0.000113856	0.00161281	1.29704
ENSMUSG00000061028	-0.340587	5.02454	-4.68074	0.000114176	0.00161589	0.765433
ENSMUSG00000020547	-0.526544	4.27573	-4.67897	0.000114671	0.00162146	0.850546
ENSMUSG00000001496	-1.32444	0.138881	-4.6781	0.000114915	0.00162345	1.29314
ENSMUSG00000067653	-0.597972	2.79967	-4.67696	0.000115233	0.00162375	1.10686
ENSMUSG00000044501	-0.898159	3.8871	-4.67694	0.000115239	0.00162375	0.947043
ENSMUSG00000031129	-0.417621	4.17387	-4.67692	0.000115243	0.00162375	0.879774
ENSMUSG00000024068	-0.283762	5.20799	-4.67476	0.000115854	0.00163091	0.743761
ENSMUSG00000048756	0.353089	7.07984	4.67112	0.000116886	0.00164397	0.749935
ENSMUSG00000038319	-1.43643	0.22829	-4.66981	0.000117261	0.00164779	1.24263
ENSMUSG00000030142	1.46029	5.47928	4.66937	0.000117387	0.00164809	0.739482
ENSMUSG00000020601	-1.0054	5.97806	-4.66883	0.000117542	0.00164826	0.712669
ENSMUSG00000085586	-0.693965	2.20731	-4.66857	0.000117615	0.00164826	1.11072
ENSMUSG00000041272	-0.901383	3.35039	-4.66824	0.00011771	0.00164826	0.97134
ENSMUSG00000035495	-0.297753	4.96555	-4.66739	0.000117954	0.00164878	0.744183
ENSMUSG00000044730	-0.454603	4.15167	-4.66738	0.000117956	0.00164878	0.853173
ENSMUSG00000040446	-0.508893	3.7183	-4.66696	0.000118077	0.00164903	0.916567
ENSMUSG00000040651	-0.540504	6.38794	-4.66546	0.000118511	0.00165362	0.707712
ENSMUSG00000051977	-0.508751	3.86029	-4.66496	0.000118655	0.00165418	0.876363
ENSMUSG00000040102	-0.729151	4.95455	-4.66355	0.000119065	0.00165844	0.757438
ENSMUSG00000097777	-0.710342	1.1083	-4.66306	0.000119206	0.00165895	1.21935
ENSMUSG00000005262	-0.318019	5.33946	-4.66146	0.000119671	0.00166395	0.699573
ENSMUSG00000037364	-0.420196	7.03632	-4.66018	0.000120048	0.00166773	0.727571
ENSMUSG00000037940	-0.566921	5.76695	-4.65931	0.000120301	0.00166979	0.683892
ENSMUSG00000097469	-1.48338	0.581608	-4.65697	0.00012099	0.00167704	1.24437
ENSMUSG00000042784	-1.19162	0.456689	-4.65682	0.000121036	0.00167704	1.21705
ENSMUSG00000046985	-0.333069	6.06508	-4.65587	0.000121315	0.00167919	0.675319
ENSMUSG00000033159	0.234185	6.55577	4.65541	0.000121452	0.00167919	0.685165
ENSMUSG00000049517	-0.591437	8.18356	-4.65522	0.000121509	0.00167919	0.78252
ENSMUSG00000028256	-0.593792	2.27872	-4.65476	0.000121646	0.00167962	1.12317
ENSMUSG00000000759	-0.276737	5.74869	-4.65393	0.000121892	0.00168064	0.6704
ENSMUSG00000062743	-0.704742	3.81803	-4.65379	0.000121931	0.00168064	0.809483
ENSMUSG00000037287	-0.525605	5.56896	-4.65198	0.000122471	0.0016866	0.667957
ENSMUSG00000031788	0.804082	3.94097	4.65067	0.000122863	0.00168969	0.729352
ENSMUSG00000001520	-0.88989	1.54287	-4.65052	0.000122908	0.00168969	1.21588
ENSMUSG00000097055	-0.66138	1.53978	-4.64949	0.000123217	0.00169121	1.19441
ENSMUSG00000028333	-0.470629	7.17231	-4.64944	0.000123232	0.00169121	0.709231
ENSMUSG00000029765	1.2146	6.3121	4.64817	0.000123616	0.00169502	0.670398
ENSMUSG00000011305	1.63144	-0.456253	4.6439	0.000124909	0.00171126	1.20565
ENSMUSG00000087165	-1.04133	0.771776	-4.64126	0.000125718	0.00171936	1.21107
ENSMUSG00000039810	0.406911	4.70485	4.64091	0.000125825	0.00171936	0.721305
ENSMUSG00000030579	0.576918	8.11171	4.64083	0.000125849	0.00171936	0.746987
ENSMUSG00000079477	0.286442	7.66846	4.63969	0.000126199	0.00171936	0.710781
ENSMUSG00000076461	-0.991348	1.15889	-4.63964	0.000126215	0.00171936	1.17877
ENSMUSG00000087396	-1.02984	2.15845	-4.6396	0.000126227	0.00171936	1.09254
ENSMUSG00000070934	0.34624	5.12838	4.6395	0.000126259	0.00171936	0.675742
ENSMUSG00000051730	-0.614632	2.90953	-4.63815	0.000126676	0.00172355	0.971684
ENSMUSG00000021891	-0.352625	3.87573	-4.63764	0.000126831	0.00172419	0.807953
ENSMUSG00000032217	-0.291847	6.55054	-4.63627	0.000127256	0.00172848	0.641959
ENSMUSG00000073982	0.529393	7.39037	4.63531	0.000127554	0.00173105	0.687561
ENSMUSG00000019210	0.371892	5.59737	4.63155	0.000128732	0.00174554	0.618728
ENSMUSG00000049339	0.34918	5.93978	4.62944	0.000129395	0.00175302	0.61096
ENSMUSG00000024197	0.562418	4.41641	4.62709	0.00013014	0.00176161	0.694741
ENSMUSG00000045502	1.6392	3.60754	4.62446	0.000130976	0.00177085	0.869202
ENSMUSG00000025171	0.707813	3.18033	4.62357	0.000131261	0.00177085	0.9168
ENSMUSG00000025223	-0.519404	7.39362	-4.6231	0.000131413	0.00177085	0.647685
ENSMUSG00000064356	-1.61502	5.93445	-4.62305	0.000131427	0.00177085	0.61611
ENSMUSG00000026771	-0.348478	4.82922	-4.62284	0.000131496	0.00177085	0.615722
ENSMUSG00000031258	-0.714126	5.20014	-4.62264	0.000131559	0.00177085	0.616467
ENSMUSG00000049421	-0.490084	5.55945	-4.6225	0.000131605	0.00177085	0.602107
ENSMUSG00000051397	1.60658	3.70324	4.62131	0.000131988	0.00177451	0.82688
ENSMUSG00000022945	-0.652948	2.21469	-4.61872	0.000132825	0.00178424	1.06035
ENSMUSG00000005763	-0.923116	5.84024	-4.61825	0.000132976	0.00178476	0.588888
ENSMUSG00000021756	-0.657404	7.39555	-4.61612	0.000133671	0.00179257	0.667599
ENSMUSG00000030852	-0.967813	0.758119	-4.61317	0.000134637	0.001804	1.14695
ENSMUSG00000070425	-0.644683	4.73814	-4.61191	0.000135049	0.00180679	0.649964
ENSMUSG00000042228	0.385809	8.82439	4.61184	0.000135073	0.00180679	0.724351
ENSMUSG00000032293	-0.408343	6.4603	-4.61046	0.000135531	0.00181138	0.575371
ENSMUSG00000085434	-2.02414	-1.54573	-4.60991	0.000135712	0.00181228	0.765237
ENSMUSG00000025432	2.62626	1.67217	4.60908	0.000135987	0.00181442	1.02822
ENSMUSG00000002393	0.859577	2.66261	4.60763	0.00013647	0.00181934	0.964822
ENSMUSG00000071637	1.42393	5.24964	4.60291	0.000138051	0.0018383	0.580986
ENSMUSG00000028071	-0.800789	5.13678	-4.60237	0.000138233	0.0018383	0.589768
ENSMUSG00000042489	-0.902651	0.642114	-4.60235	0.000138241	0.0018383	1.11455
ENSMUSG00000021384	0.638201	5.0903	4.6018	0.000138424	0.00183919	0.586627
ENSMUSG00000026989	-1.69431	2.63665	-4.60095	0.000138711	0.00184146	0.960698
ENSMUSG00000076465	-1.40682	0.133268	-4.59745	0.000139901	0.00185383	1.10616
ENSMUSG00000032946	-0.333873	8.77855	-4.59719	0.000139992	0.00185383	0.679827
ENSMUSG00000086732	-2.67977	-1.36946	-4.59718	0.000139993	0.00185383	0.961242
ENSMUSG00000024939	0.563995	4.506	4.59404	0.000141072	0.00186655	0.612606
ENSMUSG00000026358	1.19195	1.52985	4.59267	0.000141543	0.00187044	1.09552
[truncated: 3,048 more rows]

## Sheet: PBL_Age18vs3_B6
Gene.Ensembl	logFC	AveExpr	t	P.Value	adj.P.Val	B
[truncated: 2,088 more rows]

## Sheet: MEMORY_Age18vs3_B6
Gene.Ensembl	logFC	AveExpr	t	P.Value	adj.P.Val	B
[truncated: 6,114 more rows]

[truncated: 3 more sheets: NAIVE_Age18vs3_NZO, MEMORY_Age18vs3_NZO, SPLEEN_Age18vs3_B6]
